# Supplementary material for: Association between expression of random gene sets and survival is evident in multiple cancer types and may be explained by sub-classification
Source: PubMed Central journal article supplement (PMC5839591; doi:10.1371/journal.pcbi.1006026), 2018-02-22

# Histogram for pVals for ACC

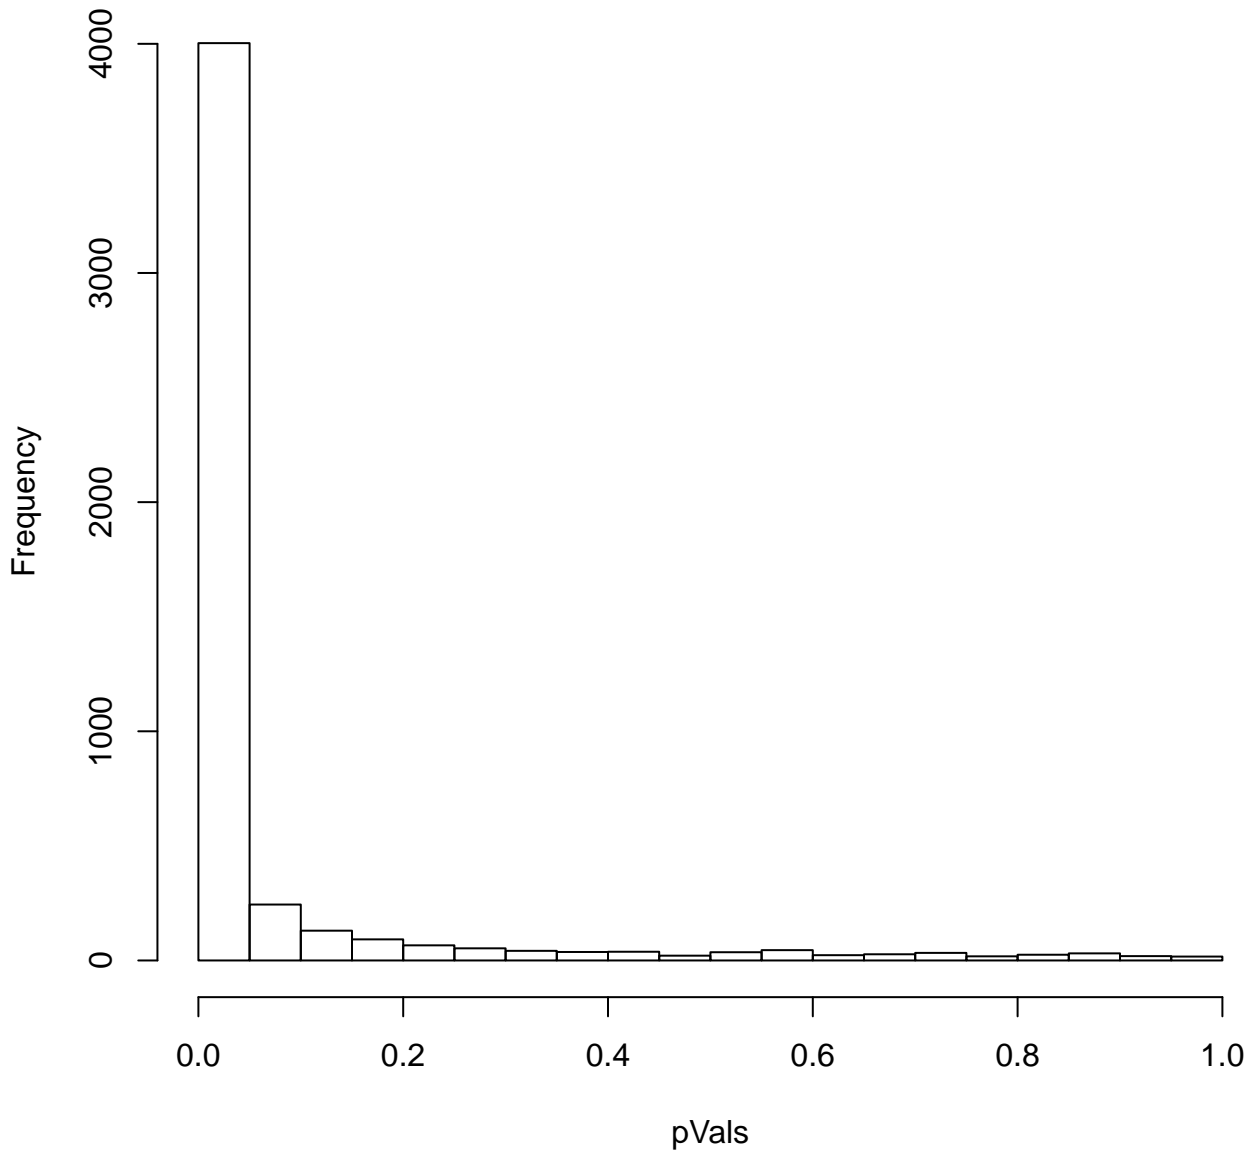

quantile plot for ACC

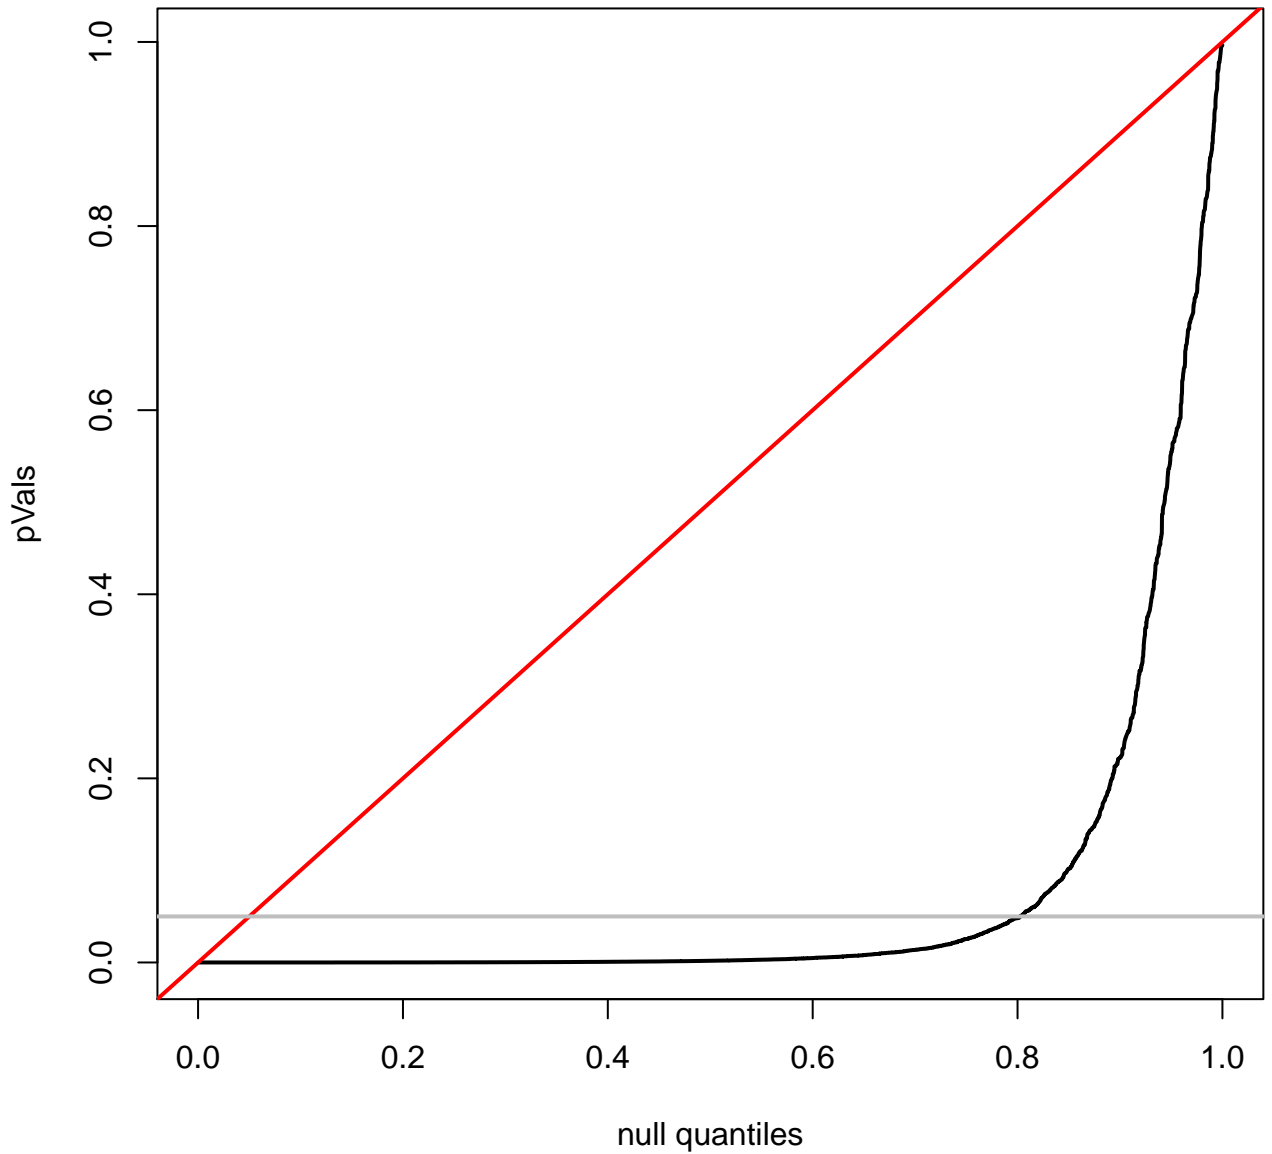

quantile plot for ACC  
(log-scale)

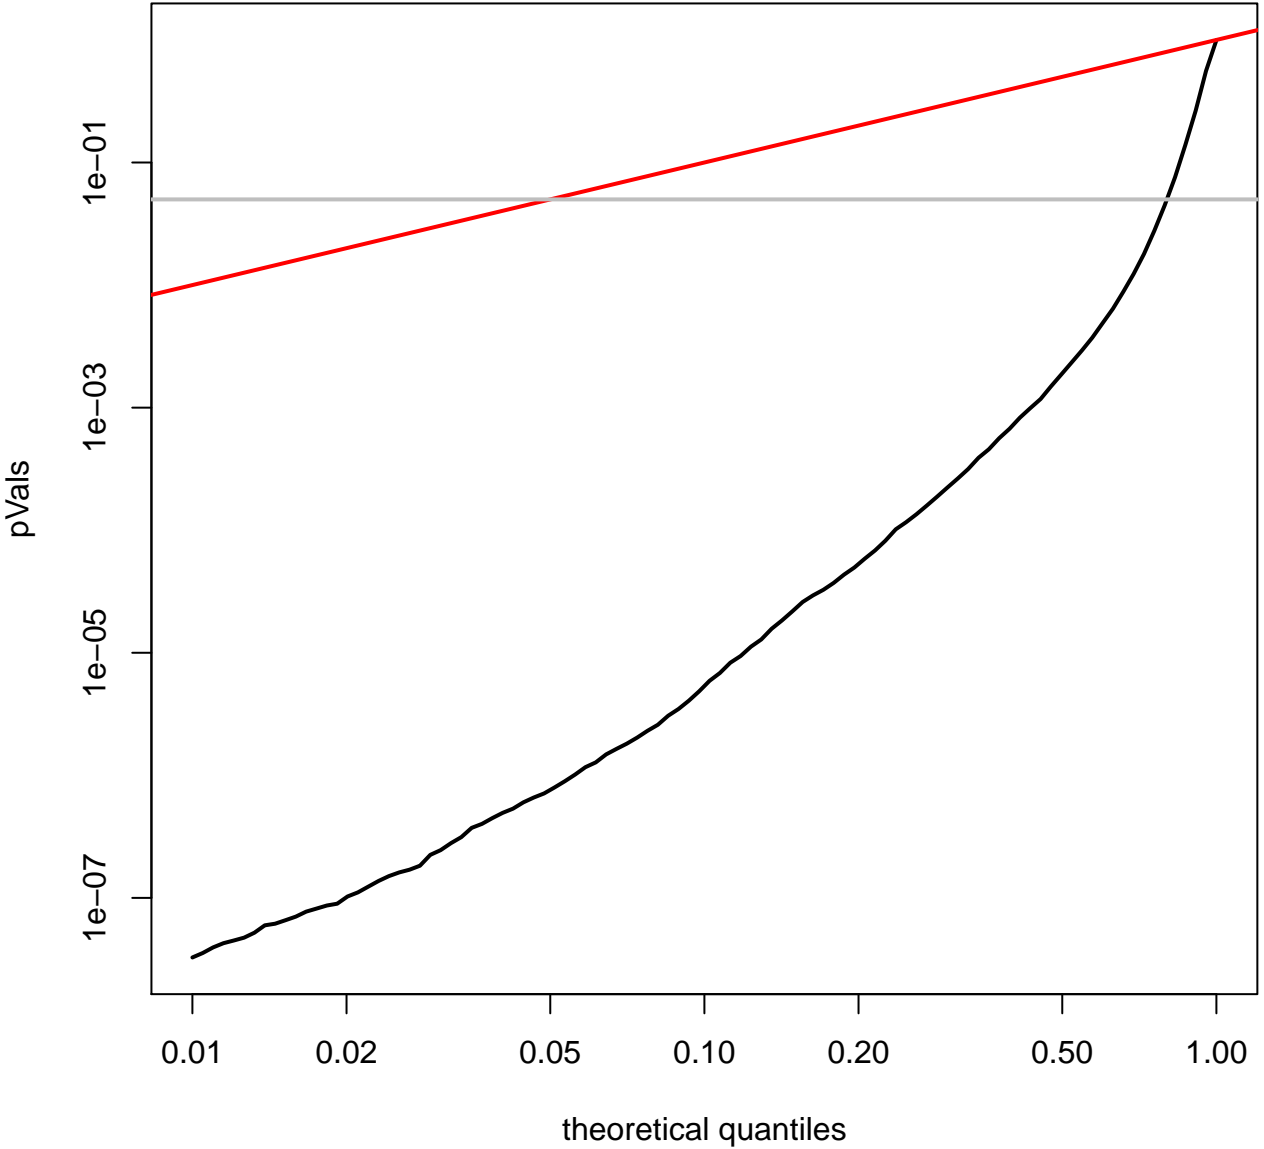

# Cumulative p-value distribution for ACC

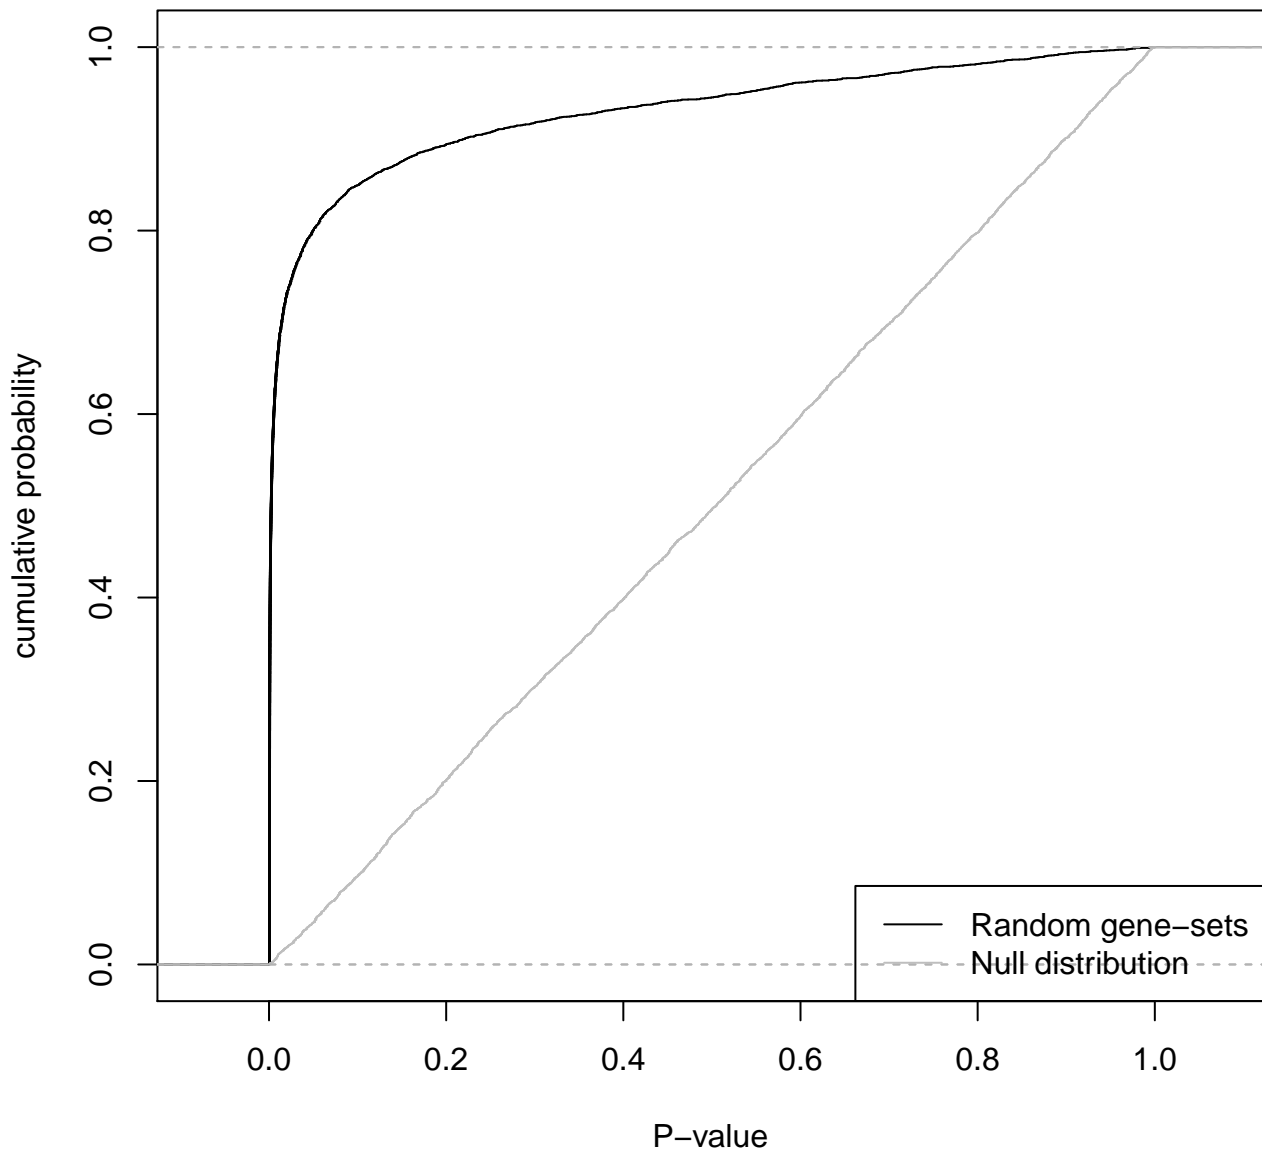

# Histogram for pVals for BLCA

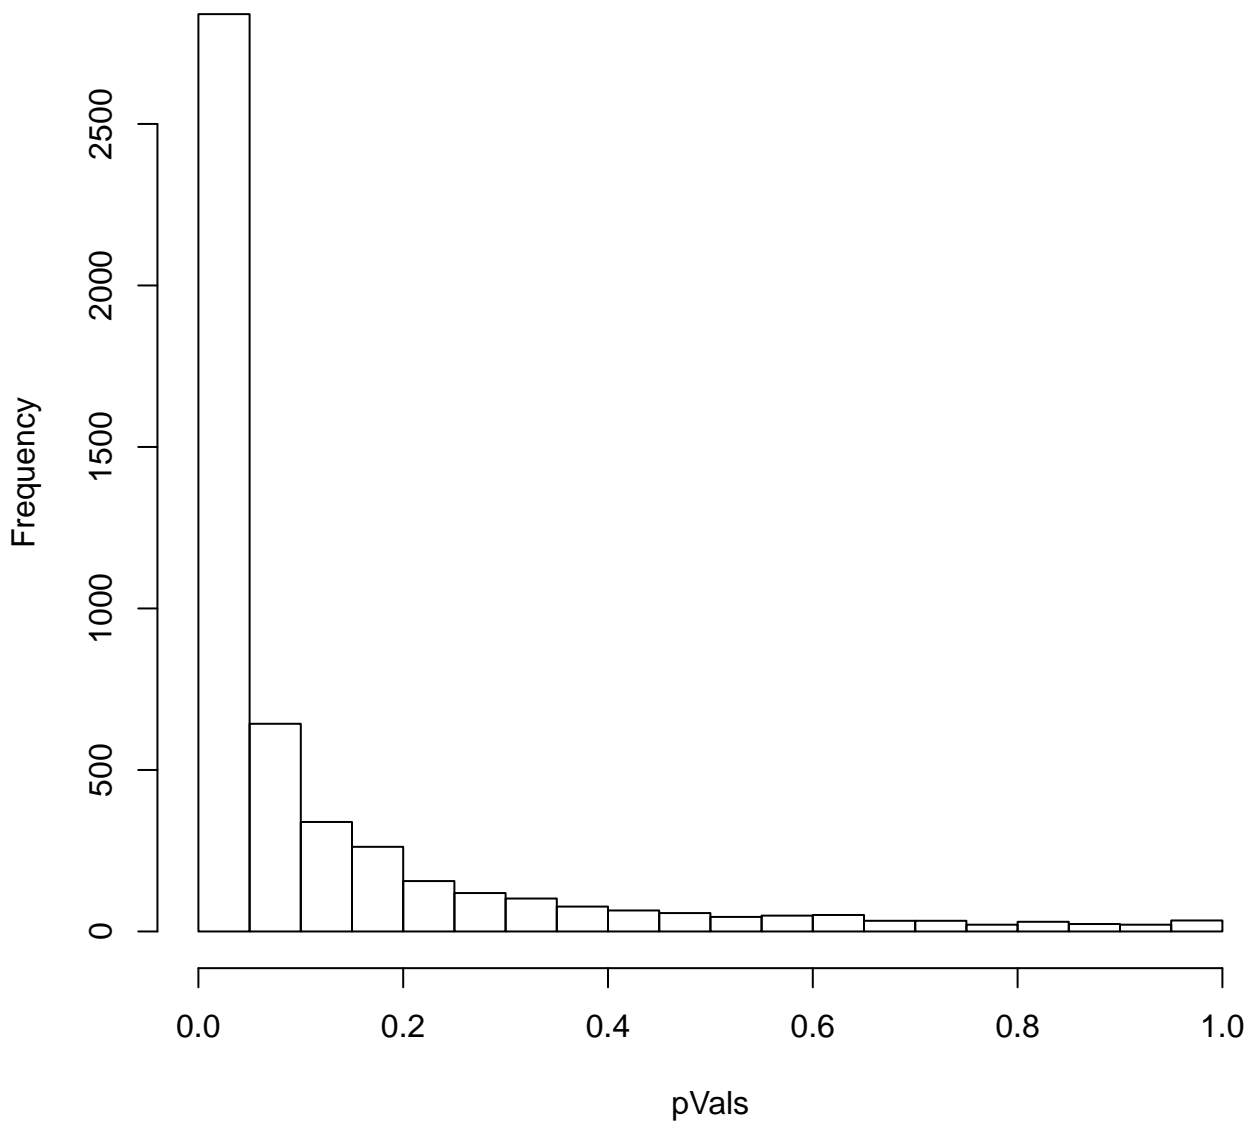

quantile plot for BLCA

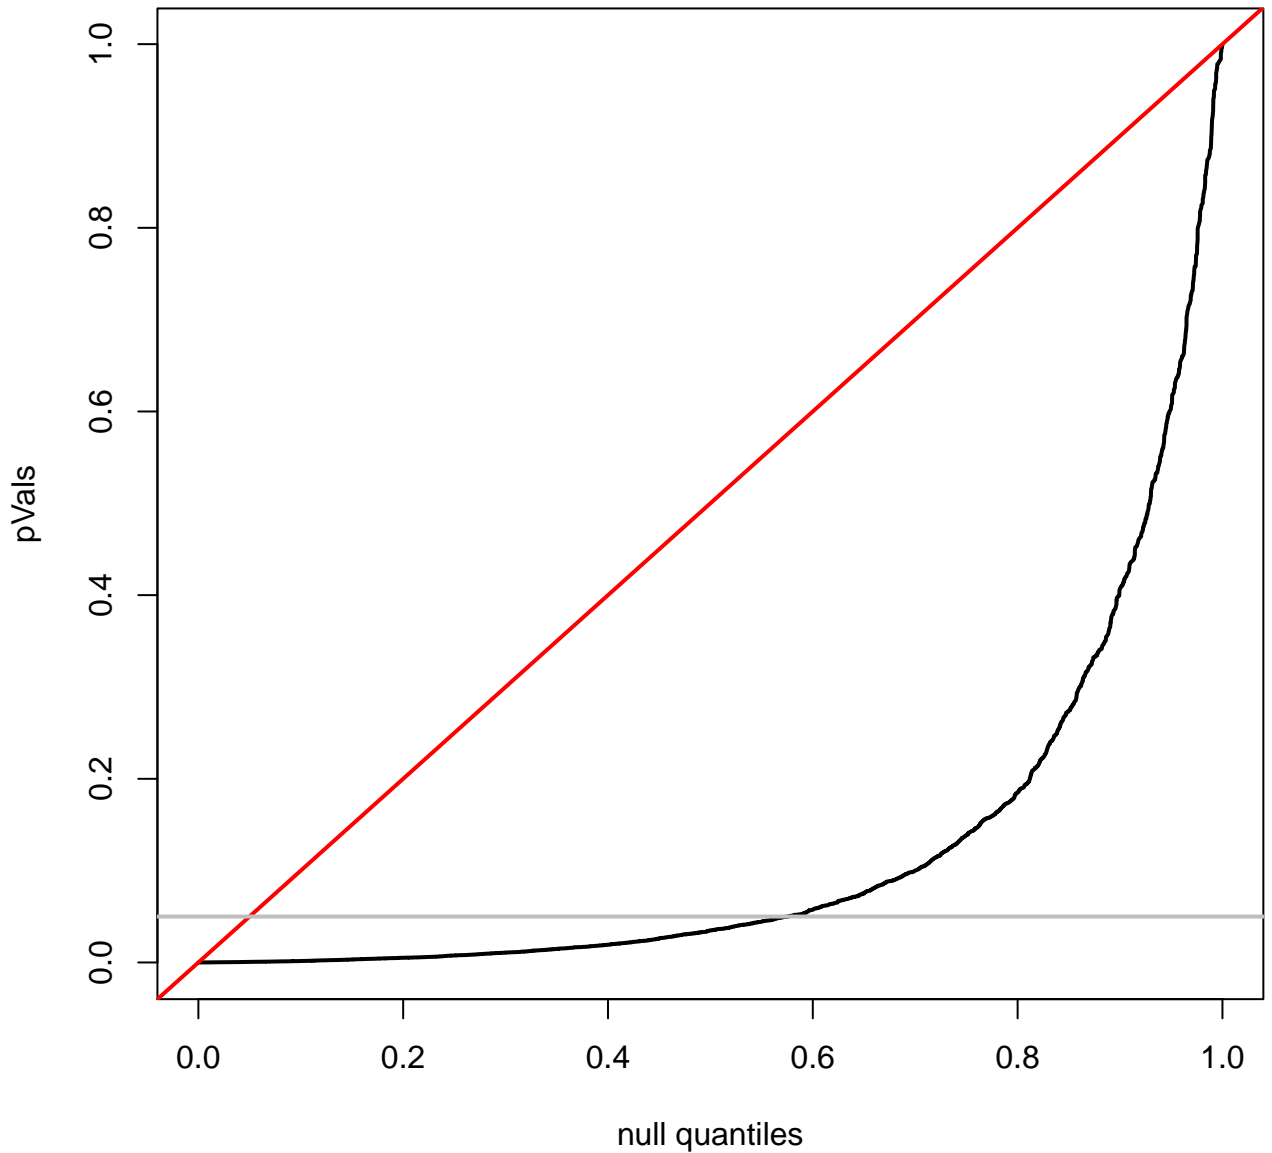

quantile plot for BLCA  
(log-scale)

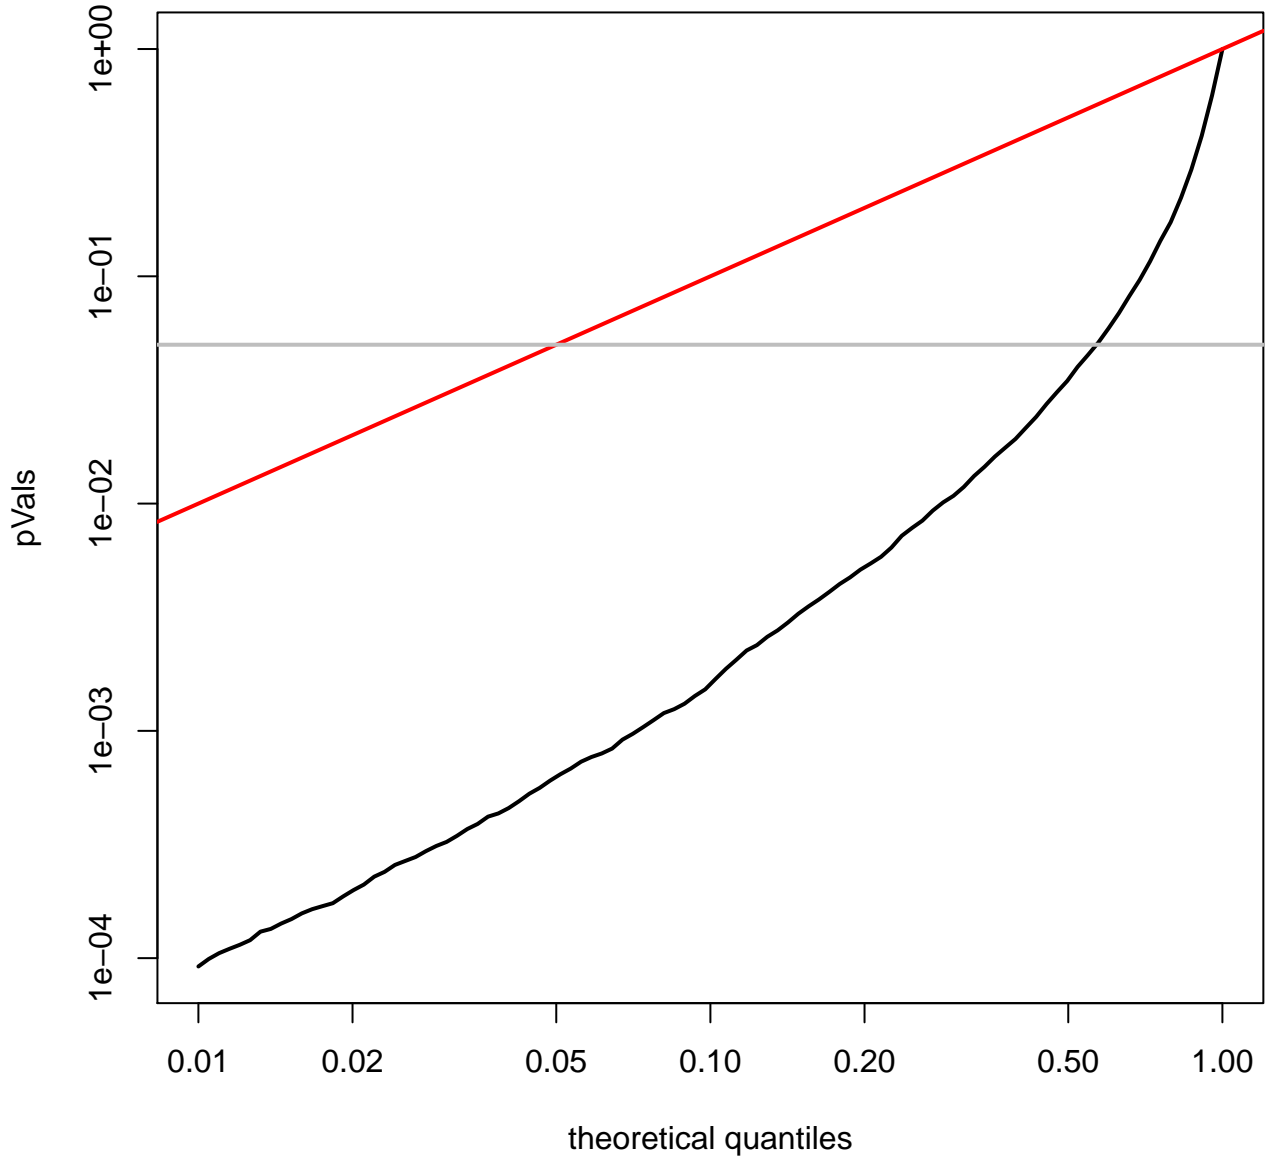

# Cumulative p-value distribution for BLCA

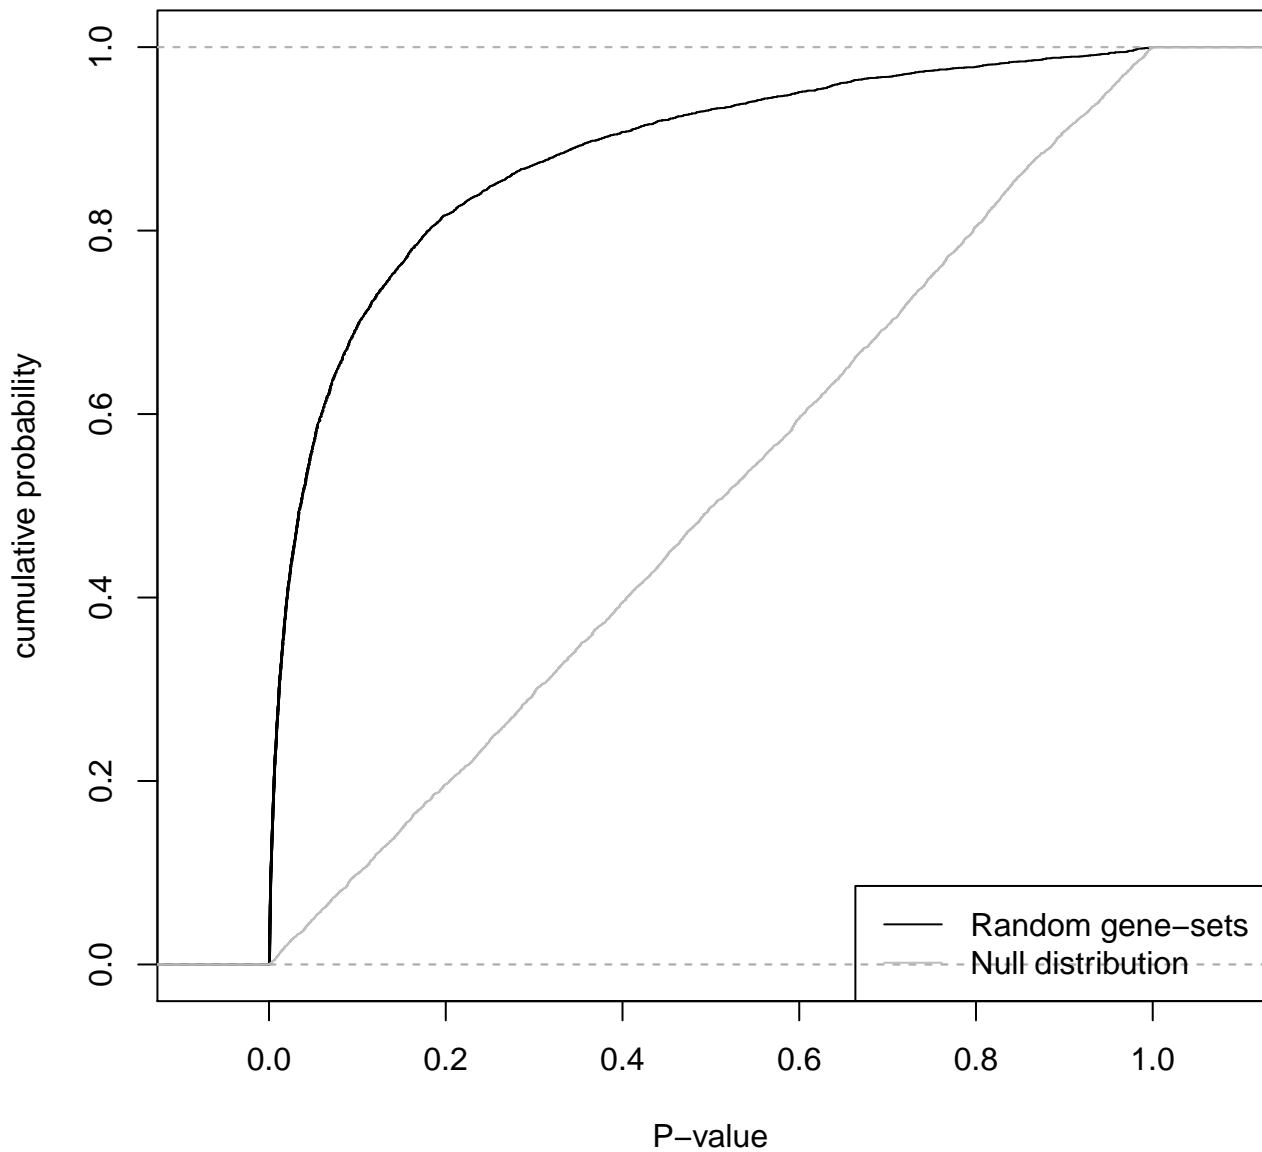



# Histogram for pVals for BRCA

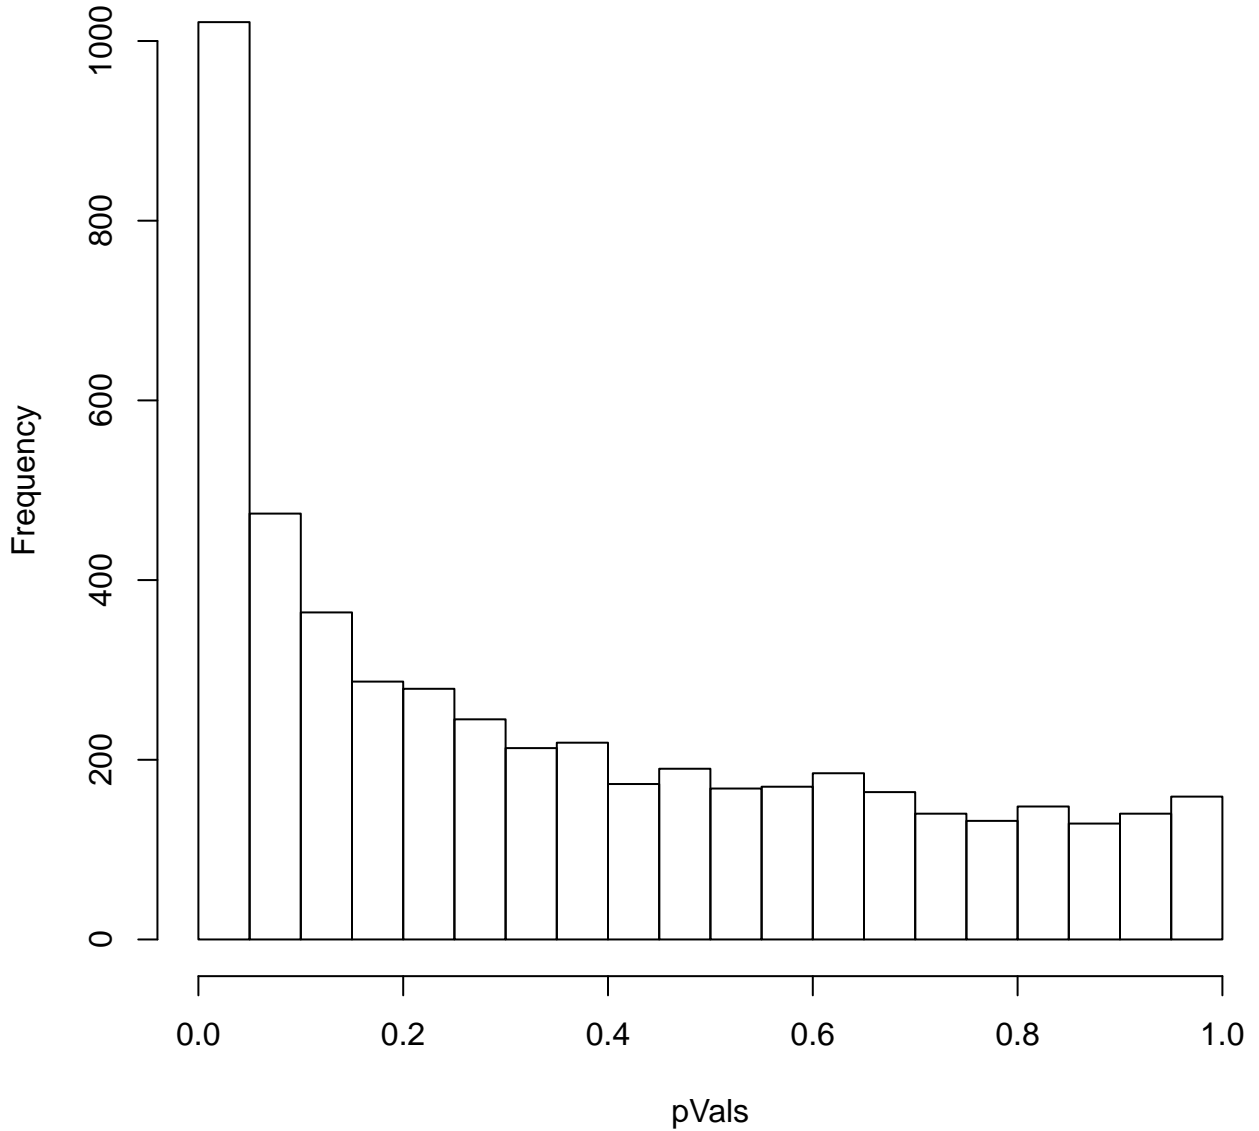

quantile plot for BRCA

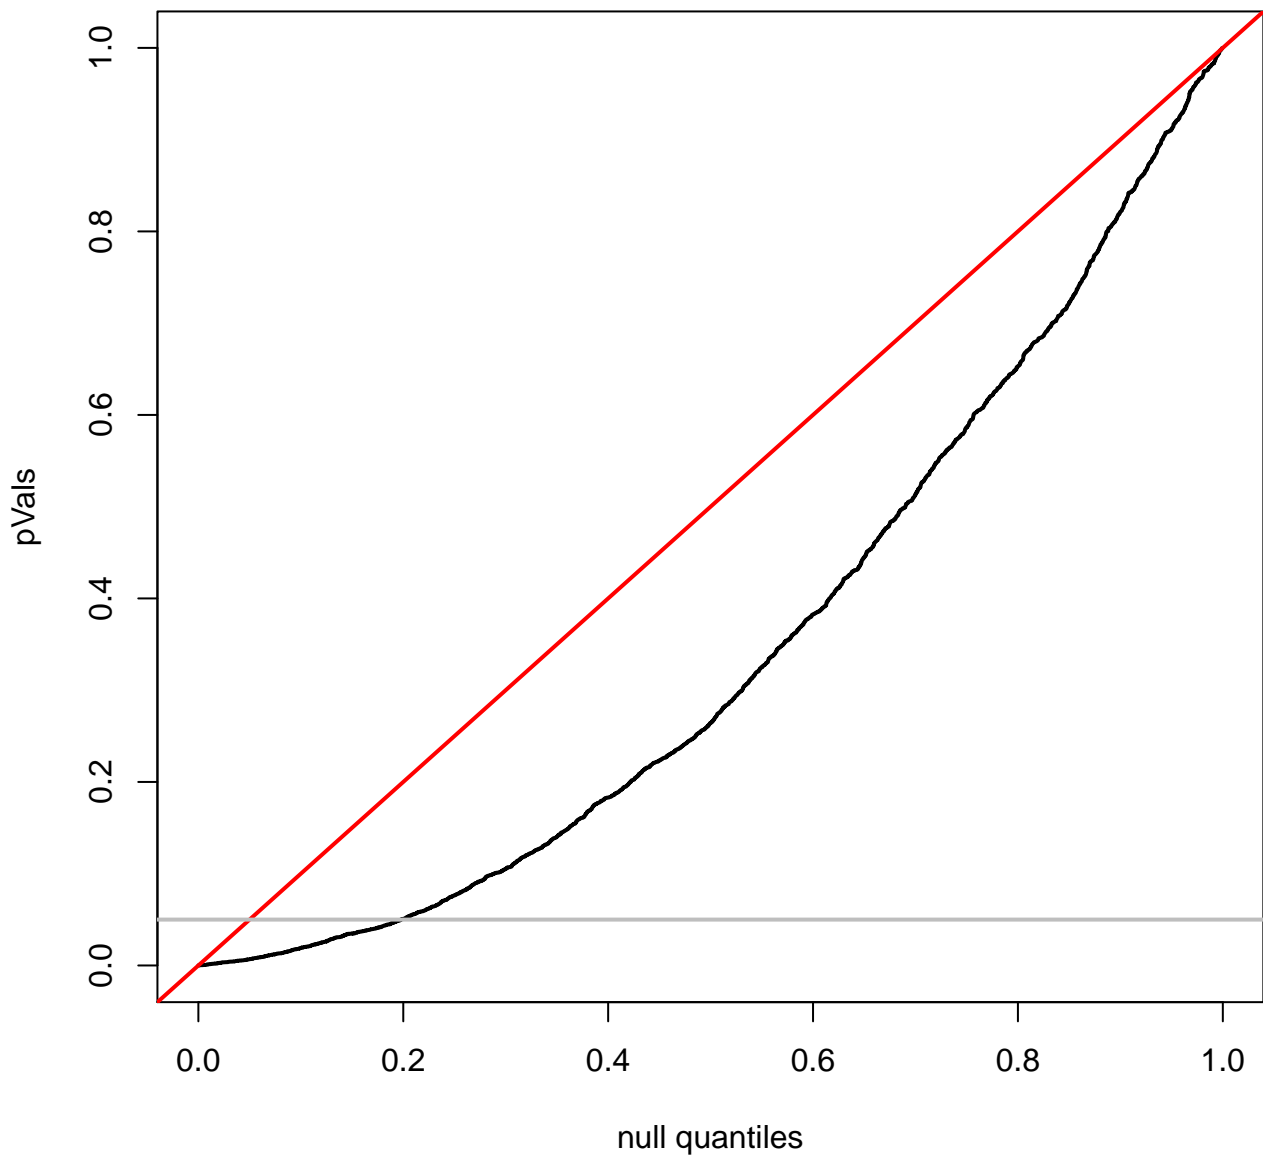

quantile plot for BRCA  
(log-scale)

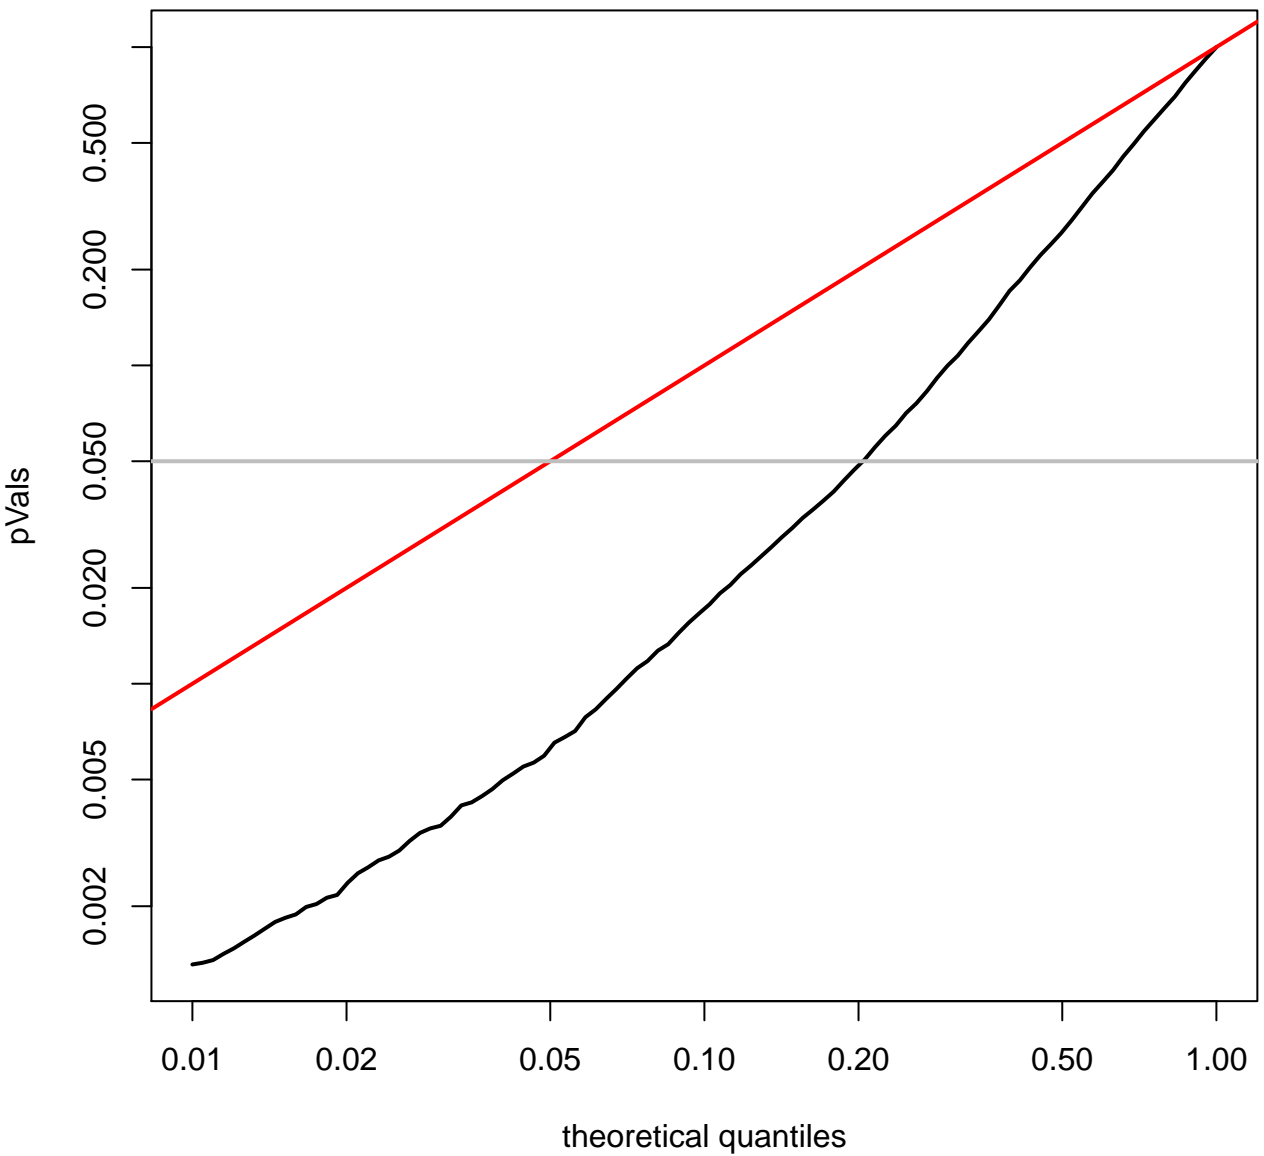

# Cumulative p-value distribution for BRCA

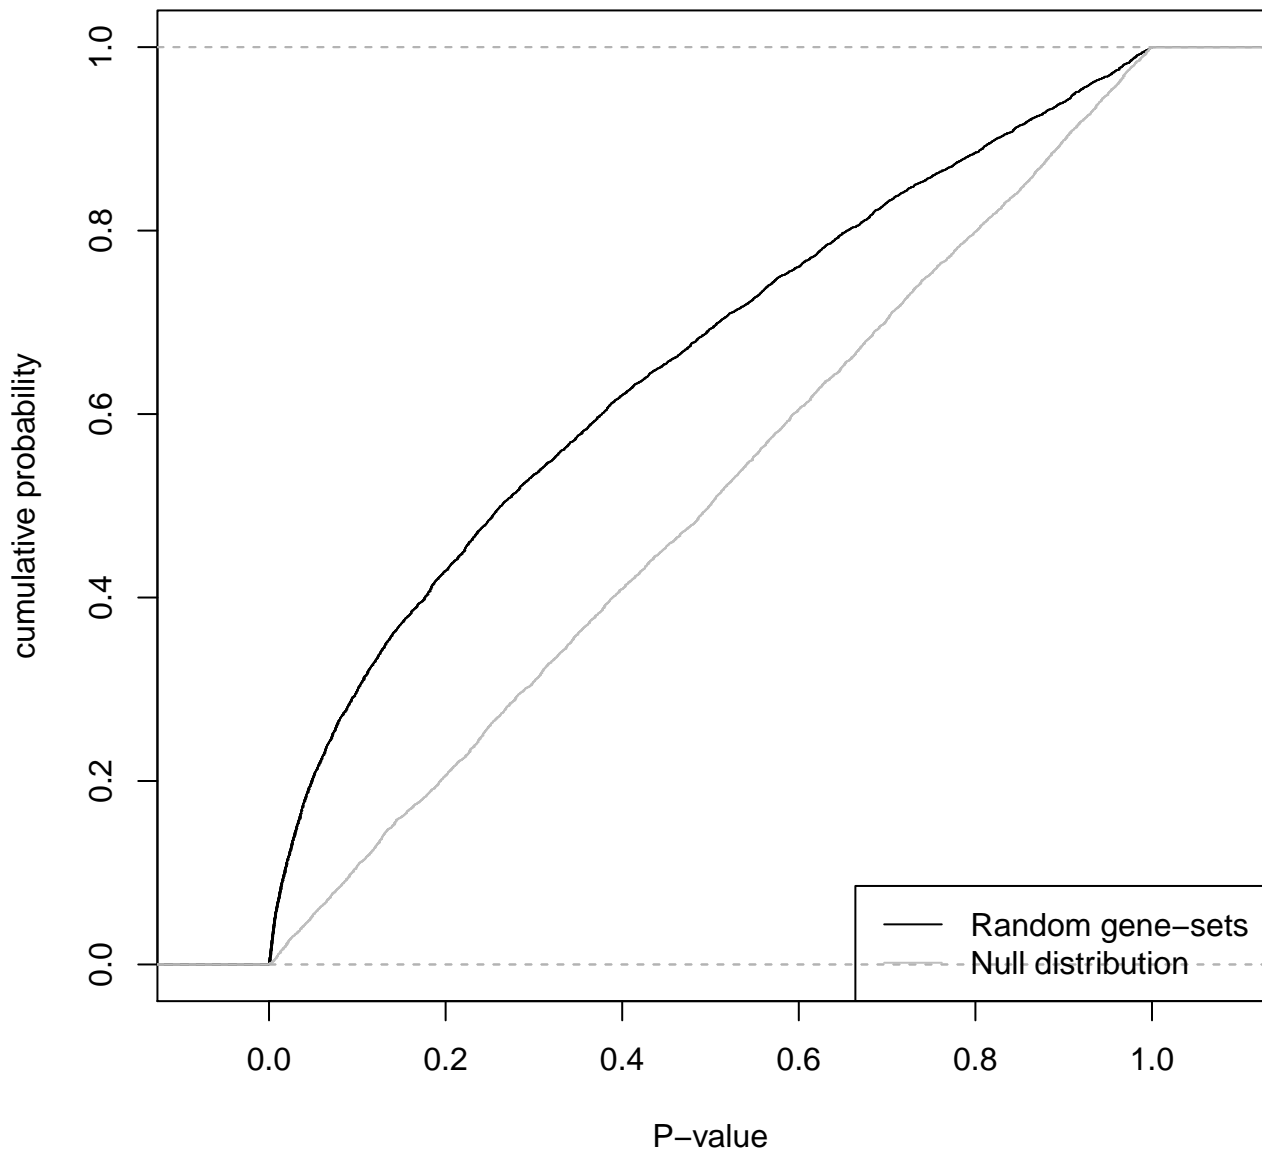

# Histogram for pVals for CESC

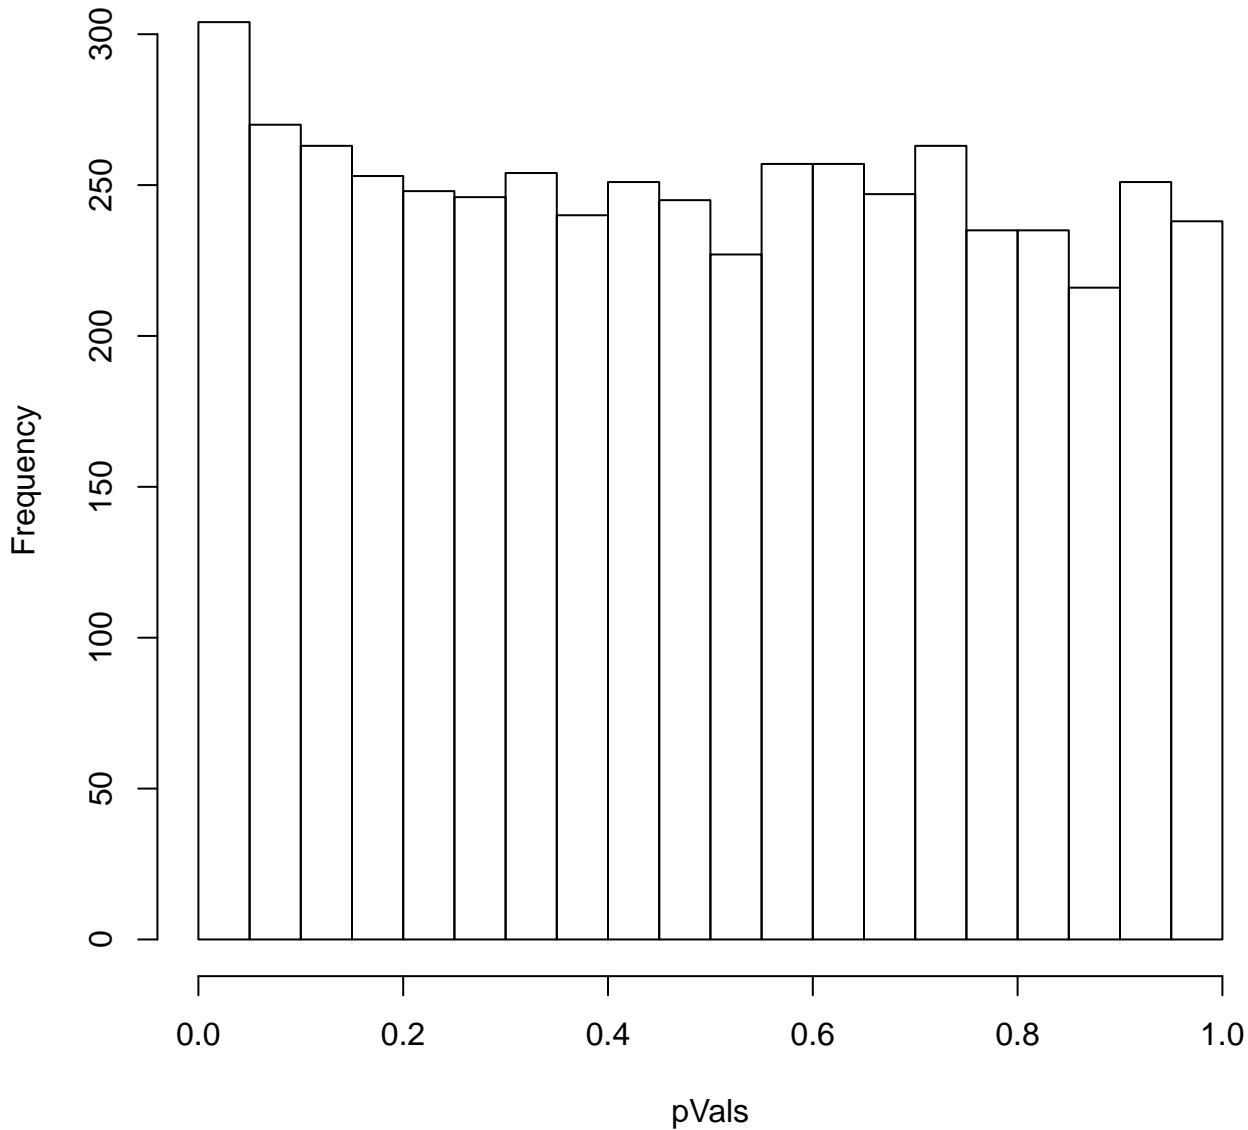

quantile plot for CESC

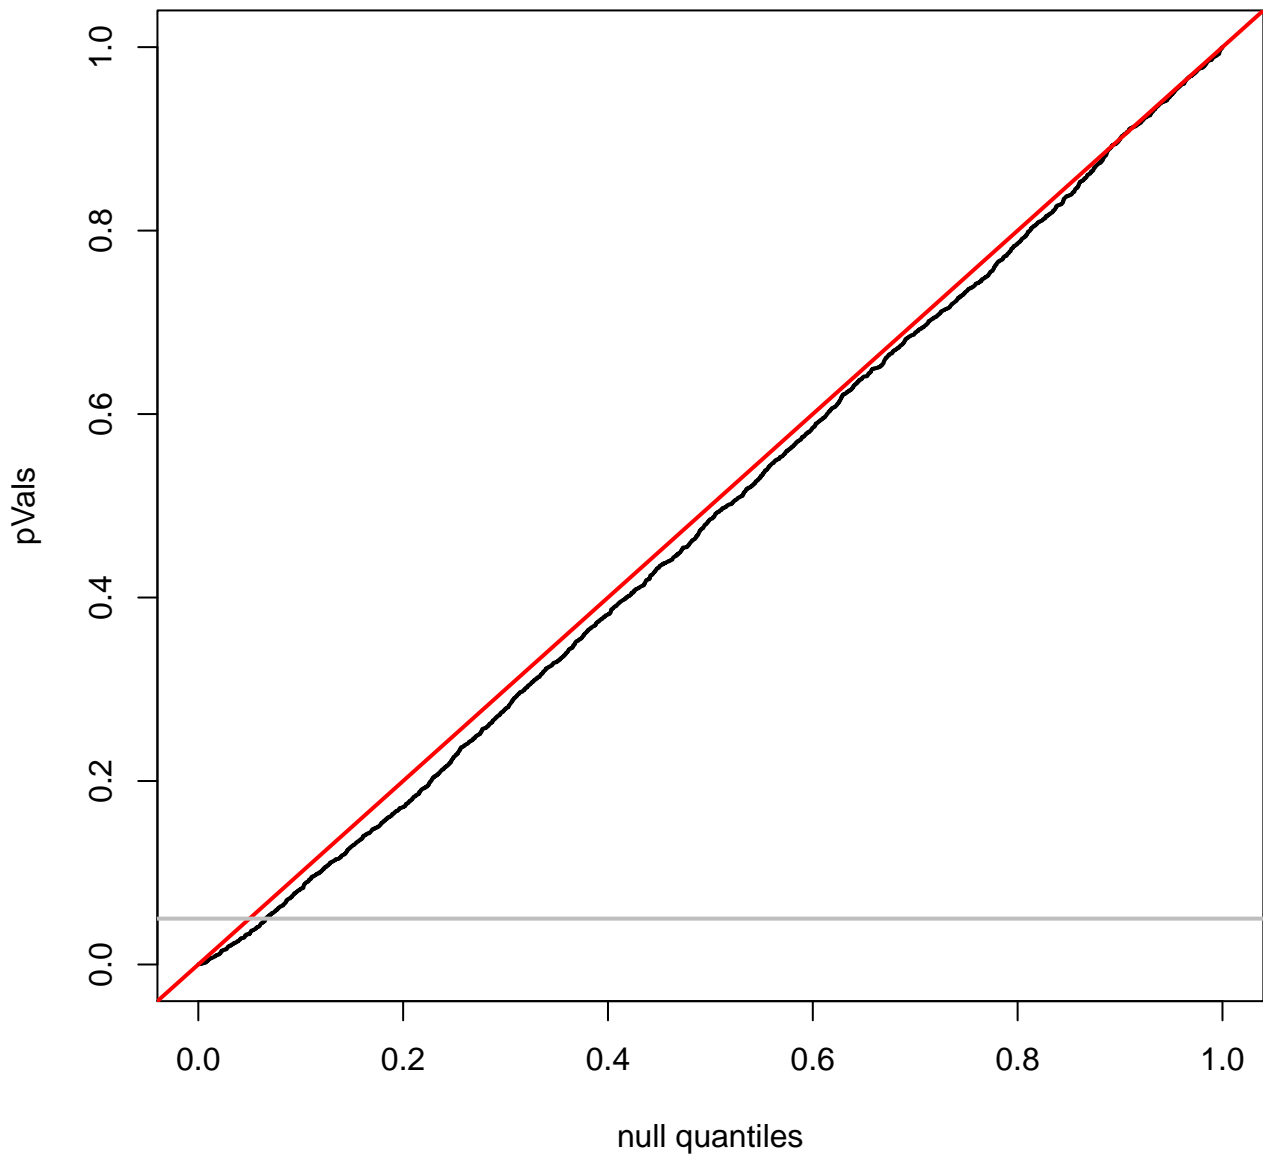

quantile plot for CESC  
(log-scale)

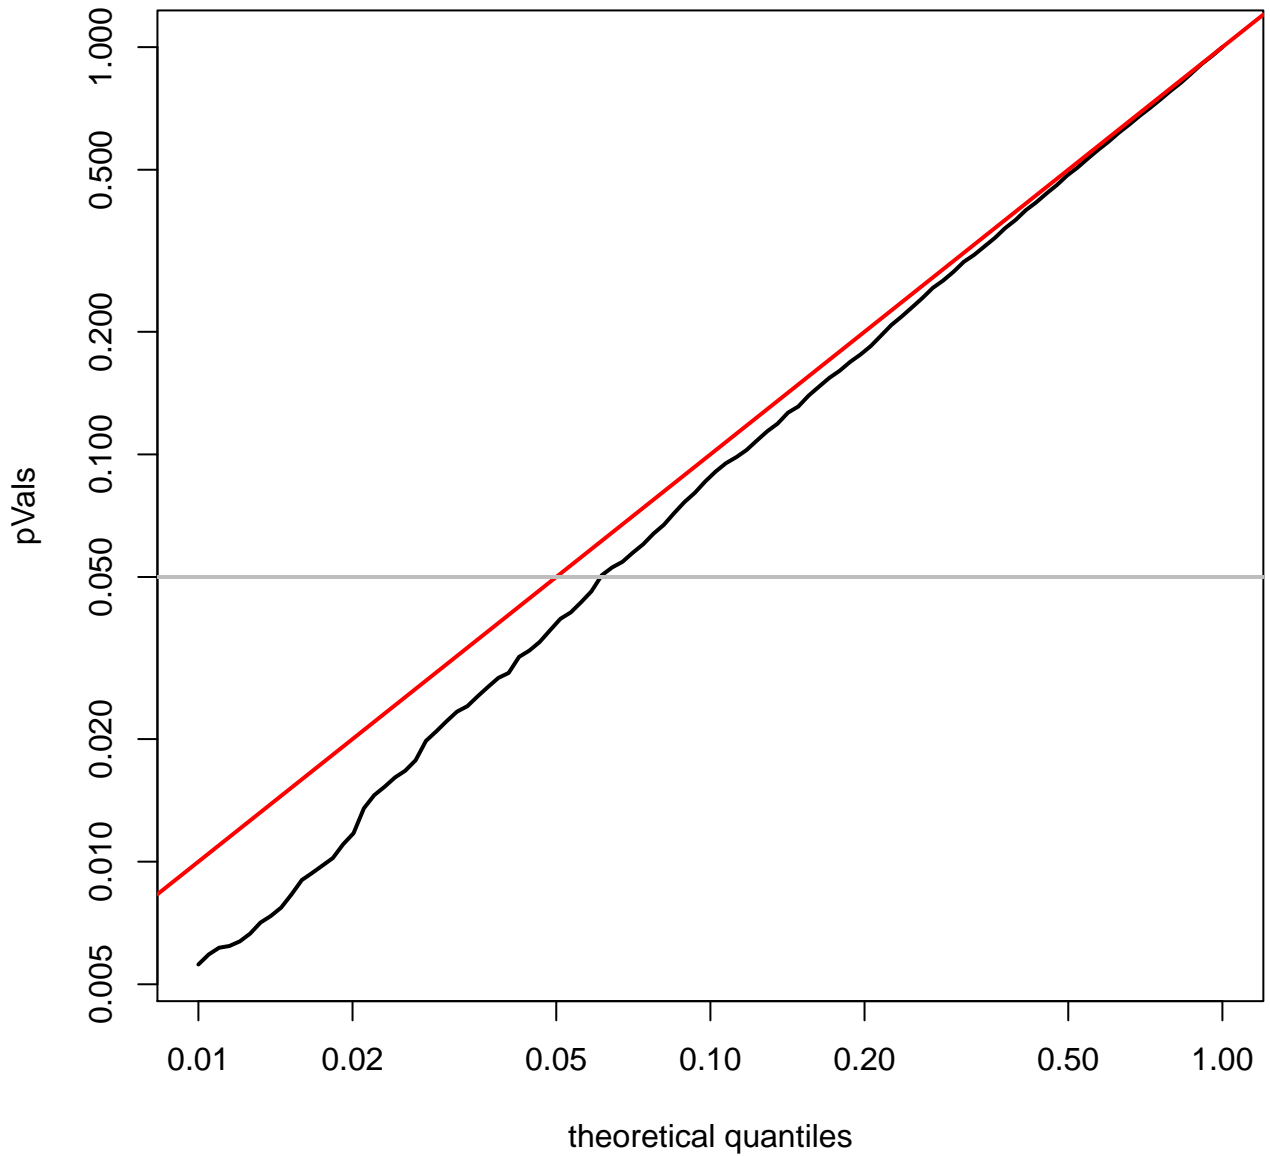

# Cumulative p-value distribution for CESC

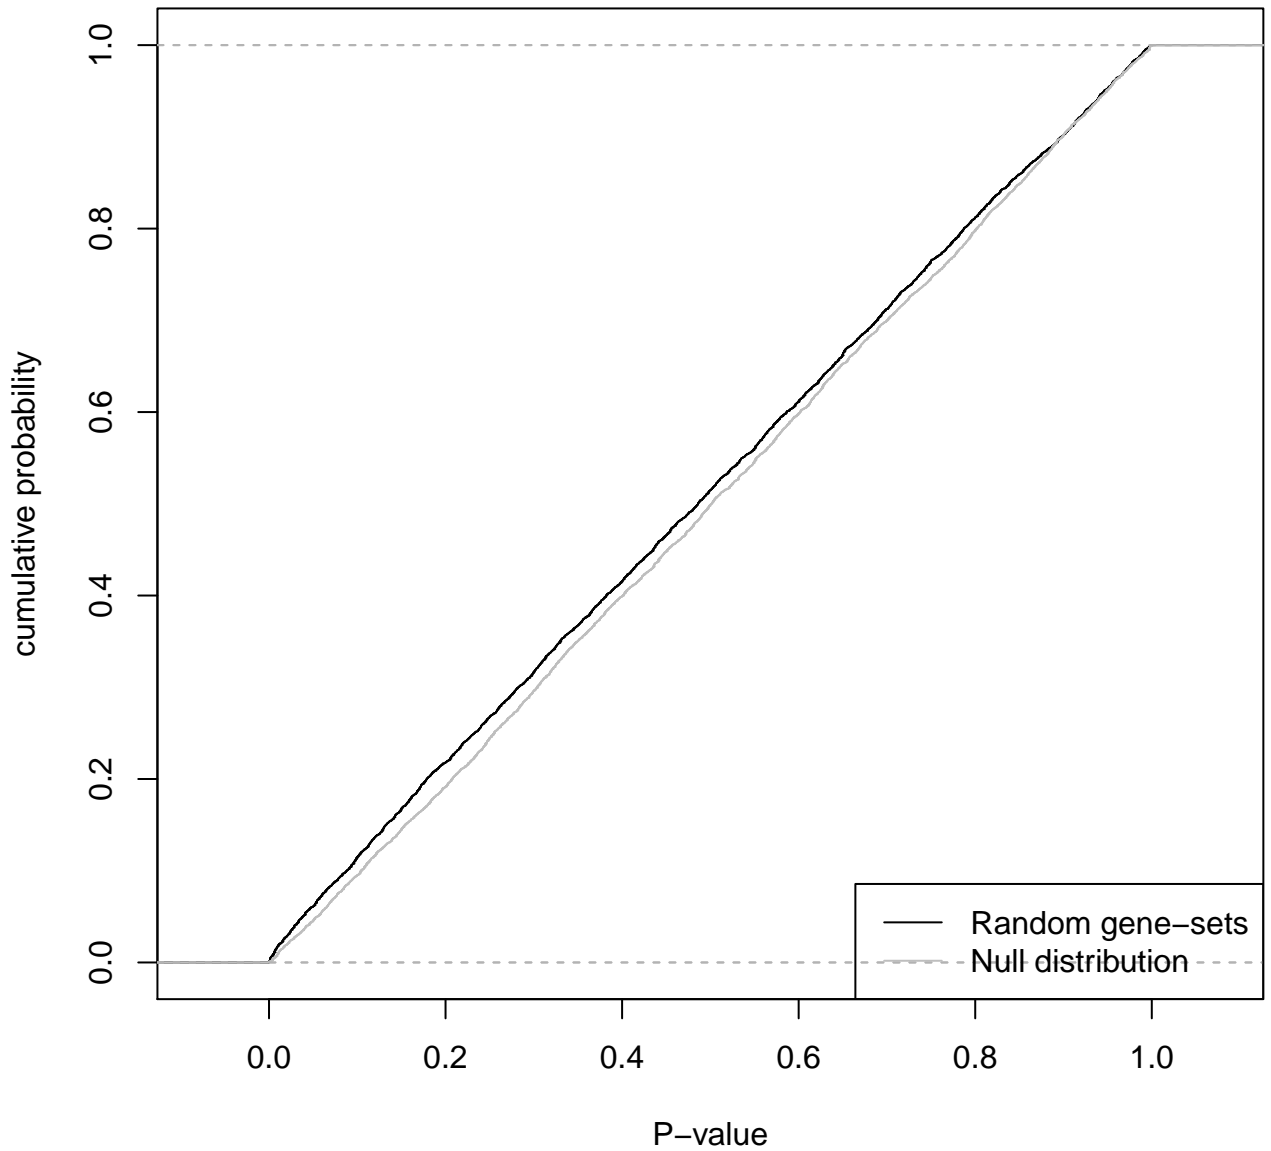



### Histogram for pVals for CHOL

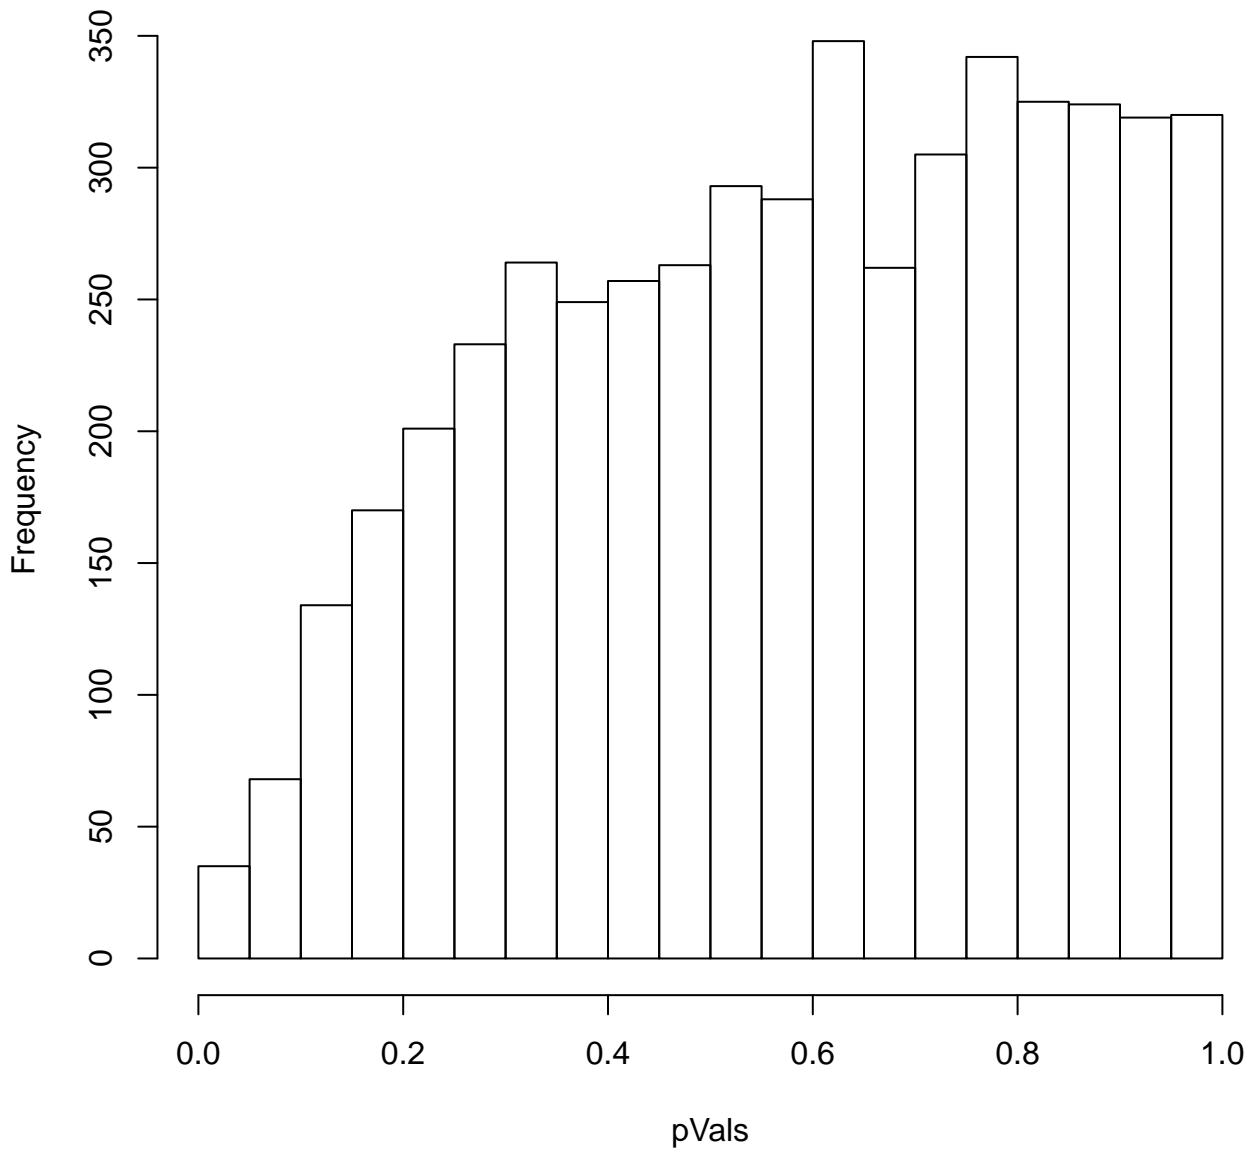

quantile plot for CHOL

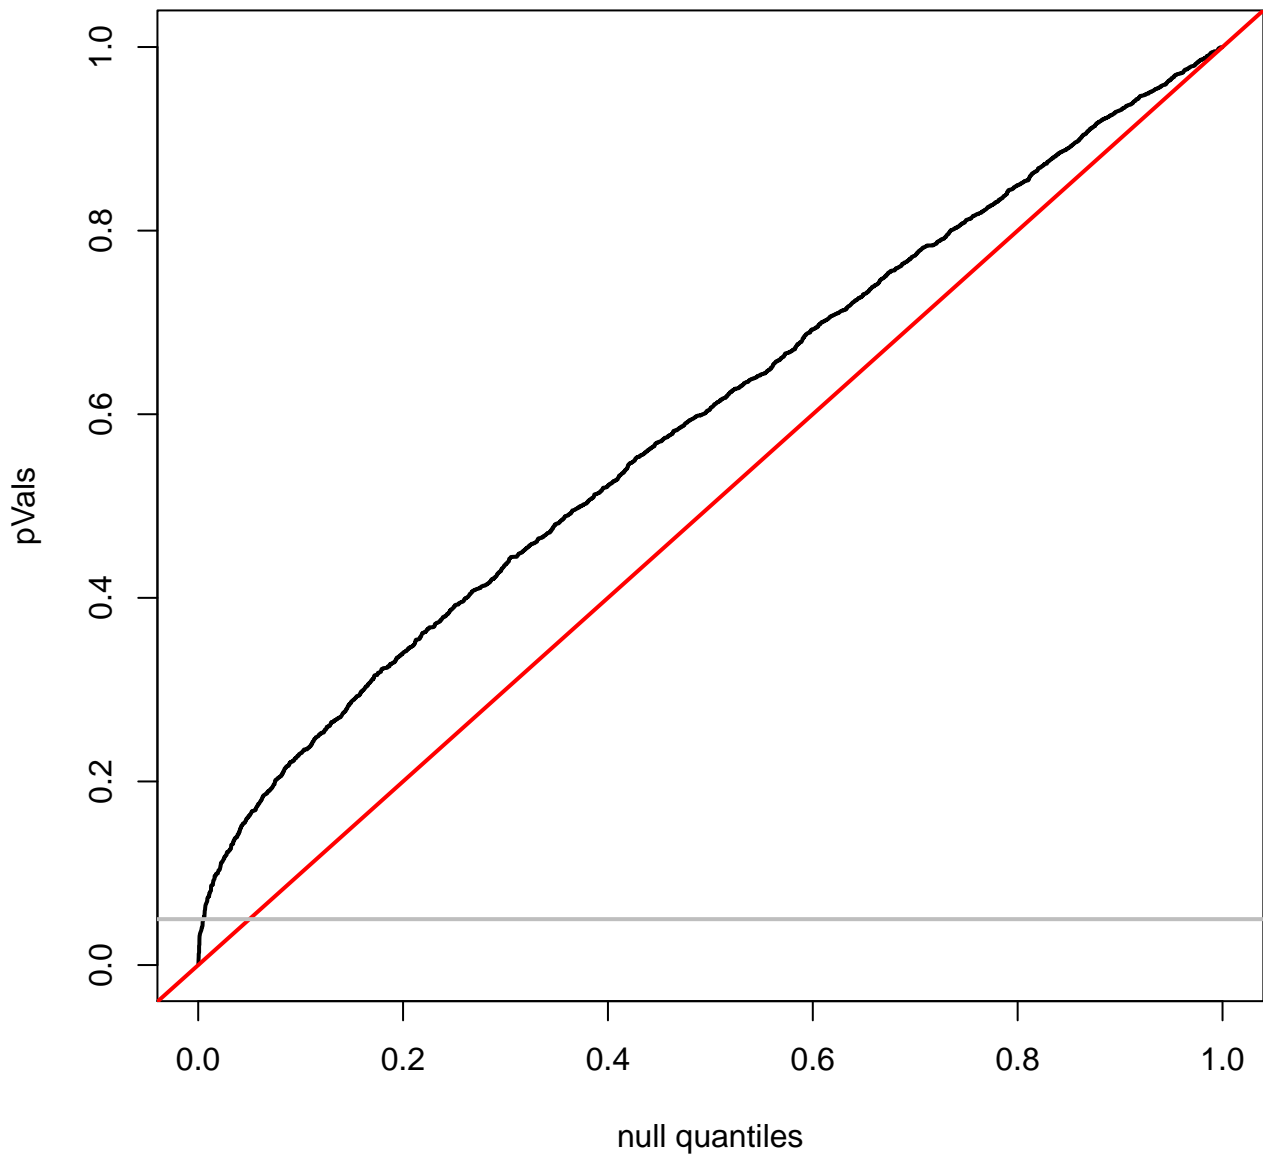

quantile plot for CHOL  
(log-scale)

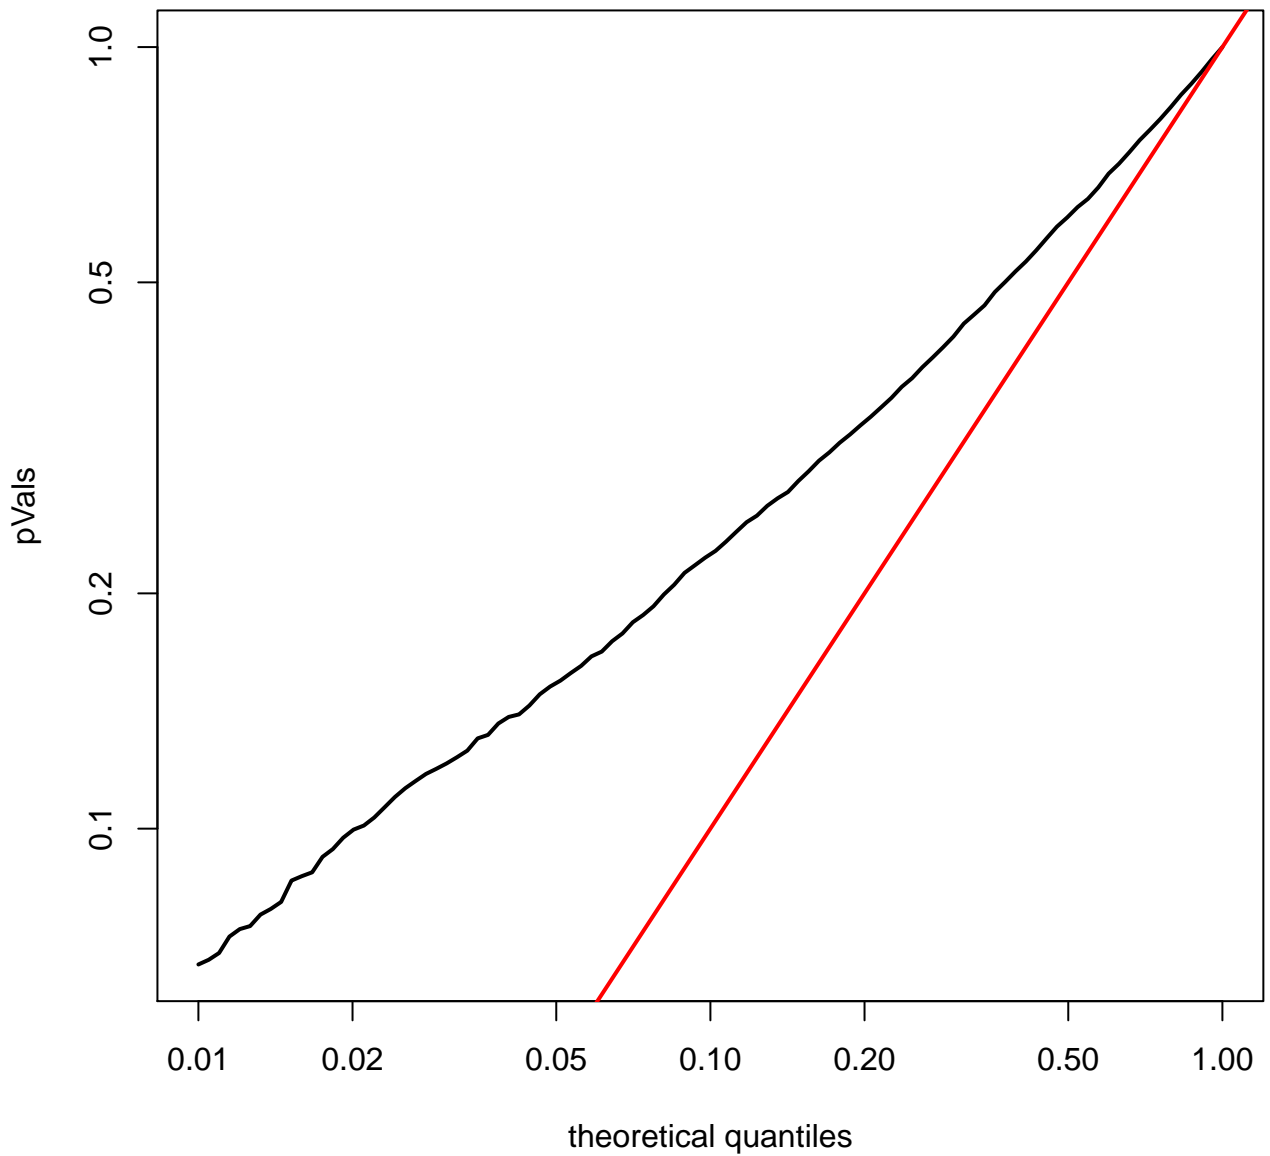

# Cumulative p-value distribution for CHOL

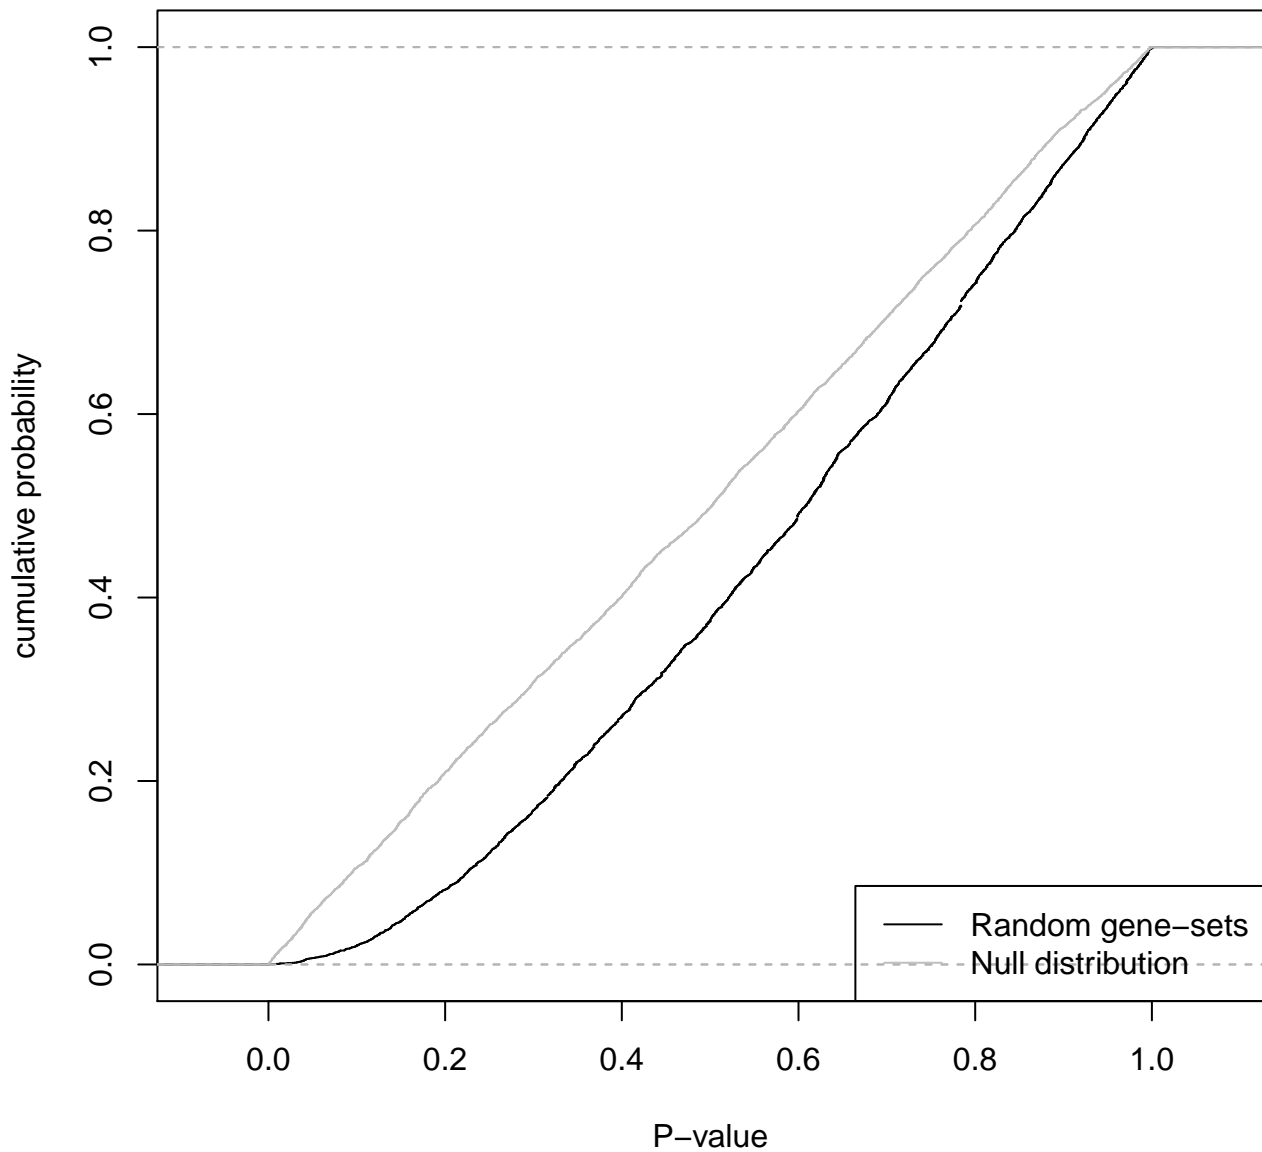

# Histogram for pVals for COAD

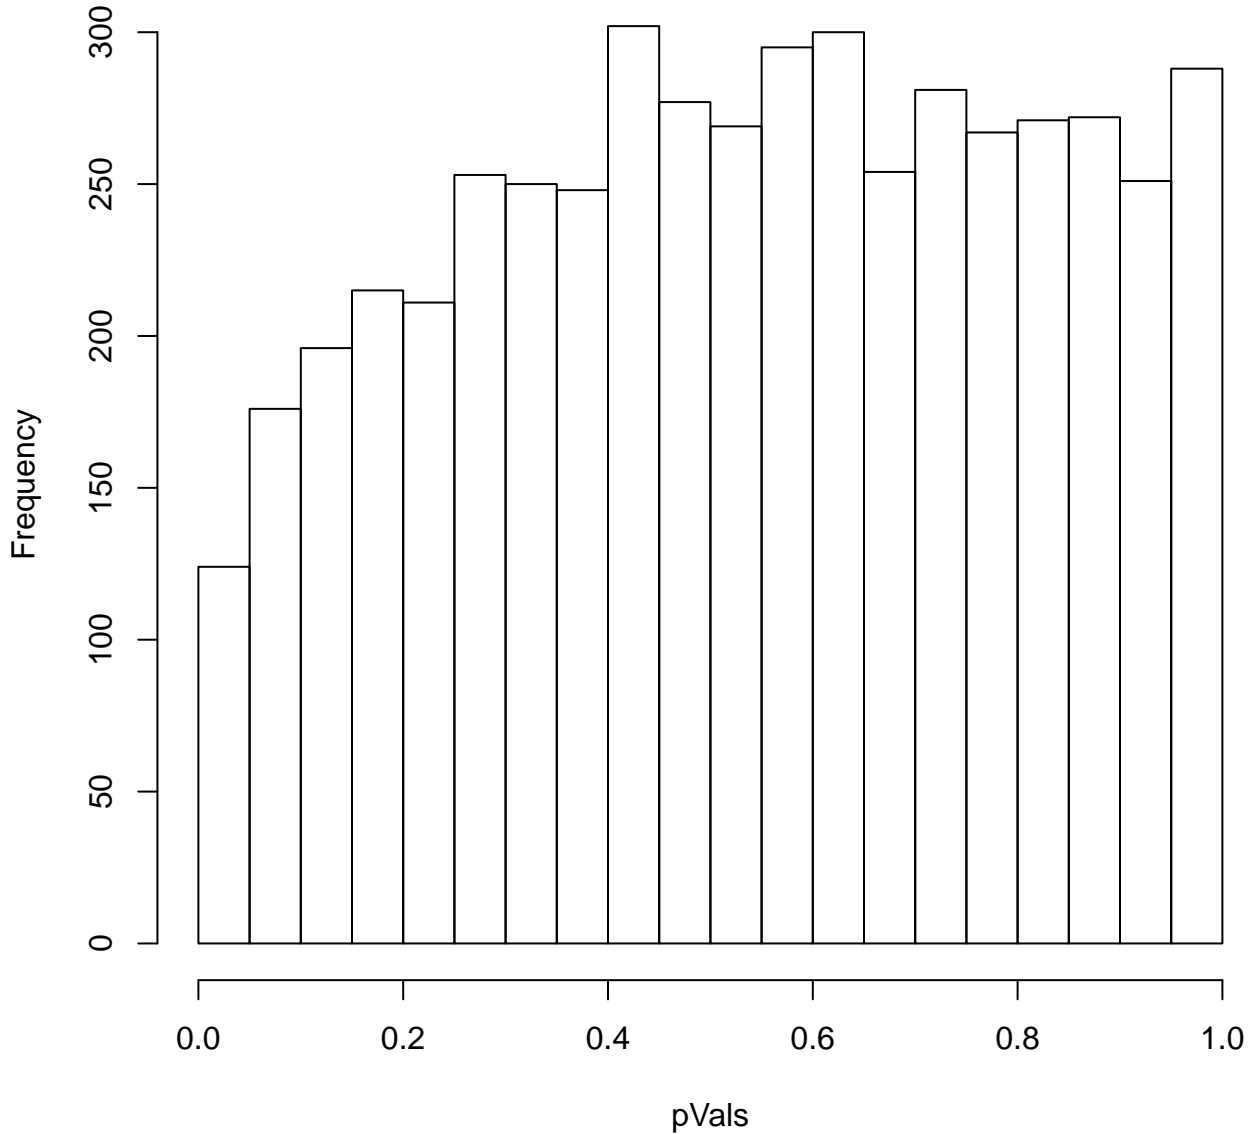

quantile plot for COAD

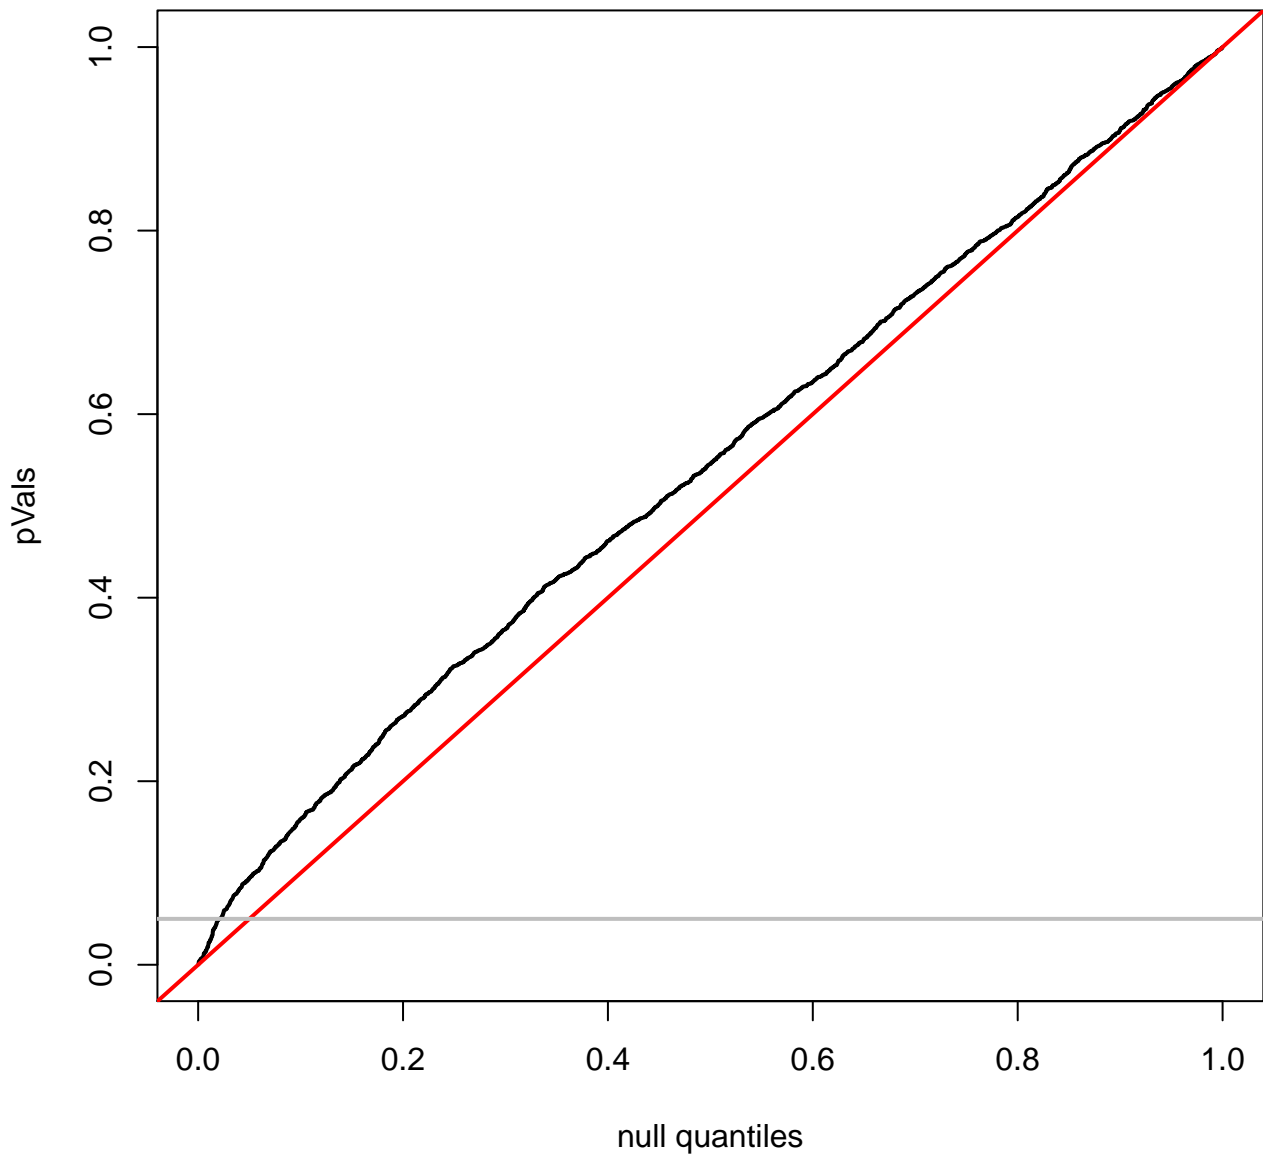

quantile plot for COAD  
(log-scale)

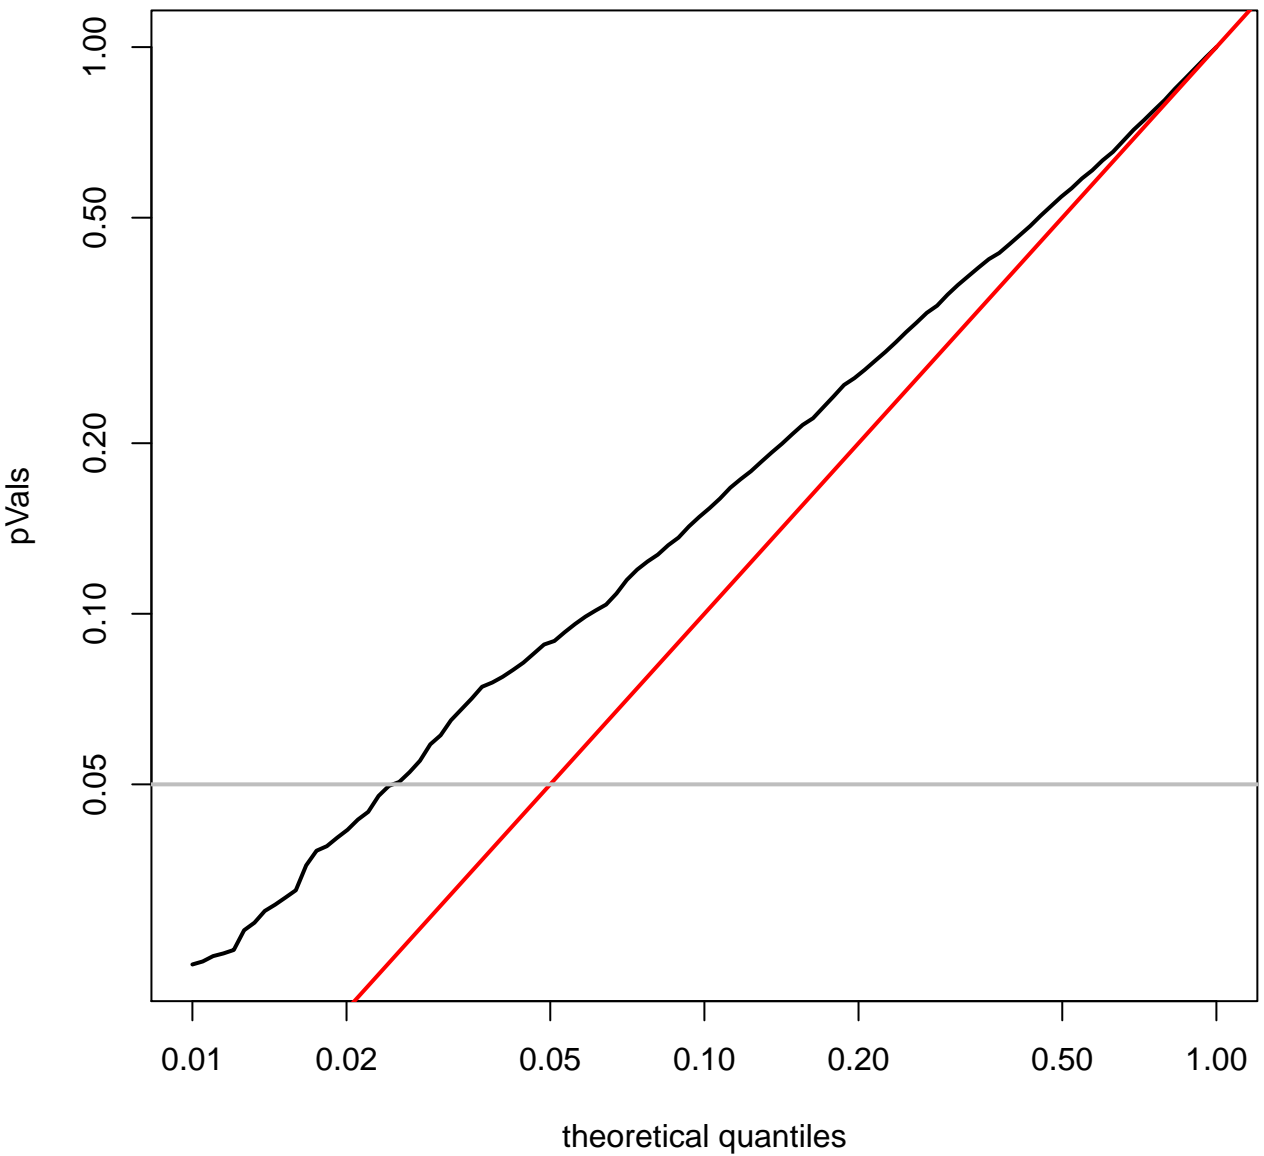

# Cumulative p-value distribution for COAD

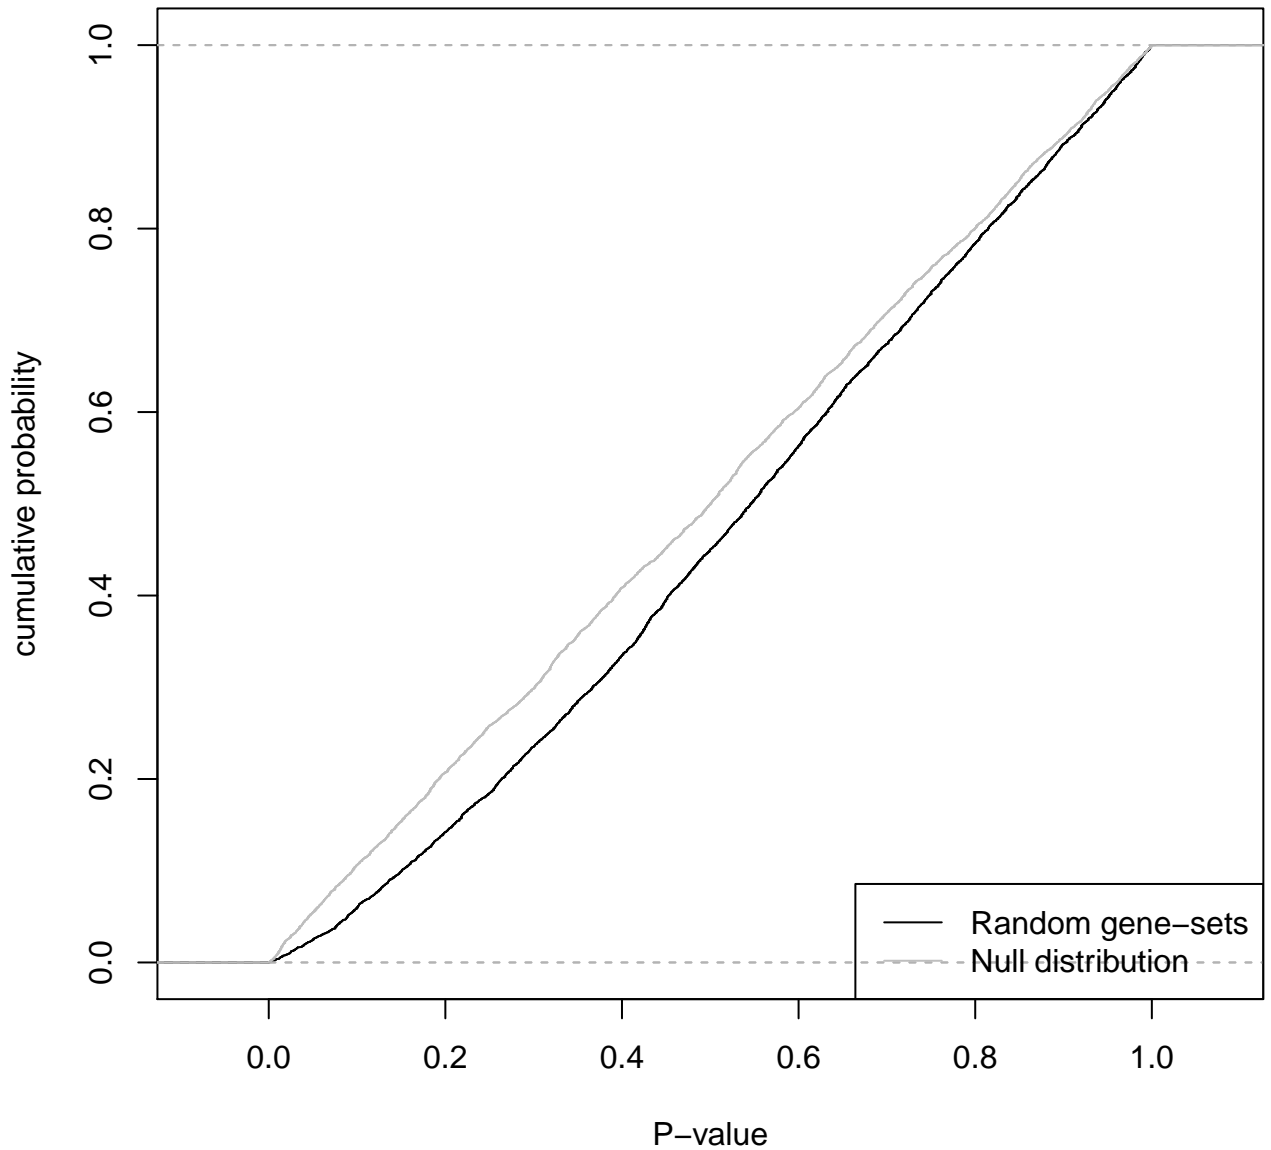



# Histogram for pVals for COADREAD

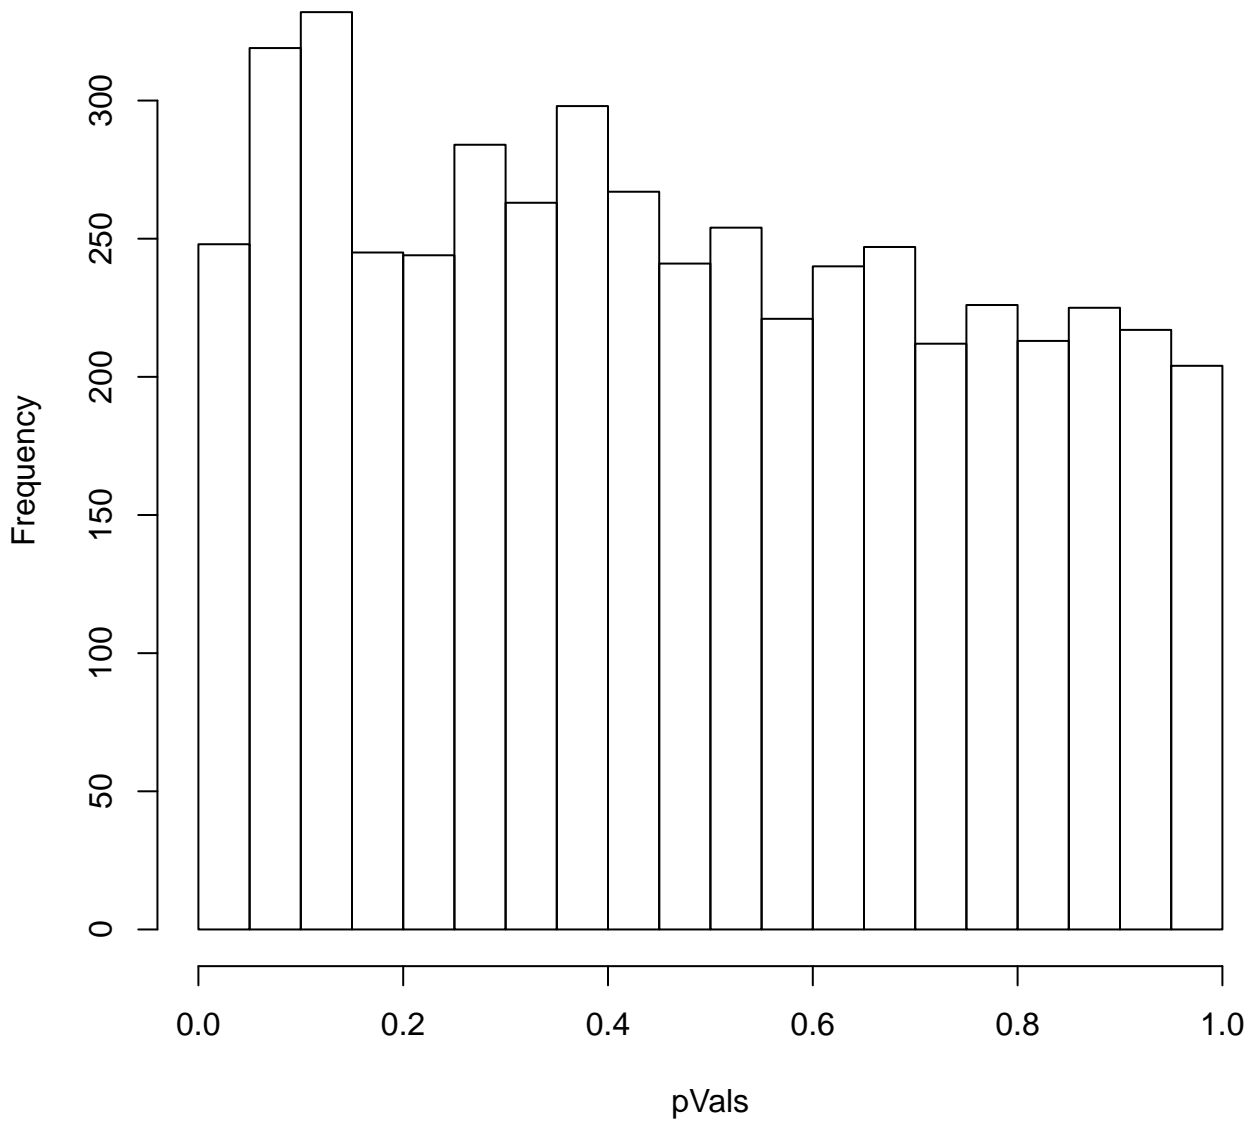

quantile plot for COADREAD

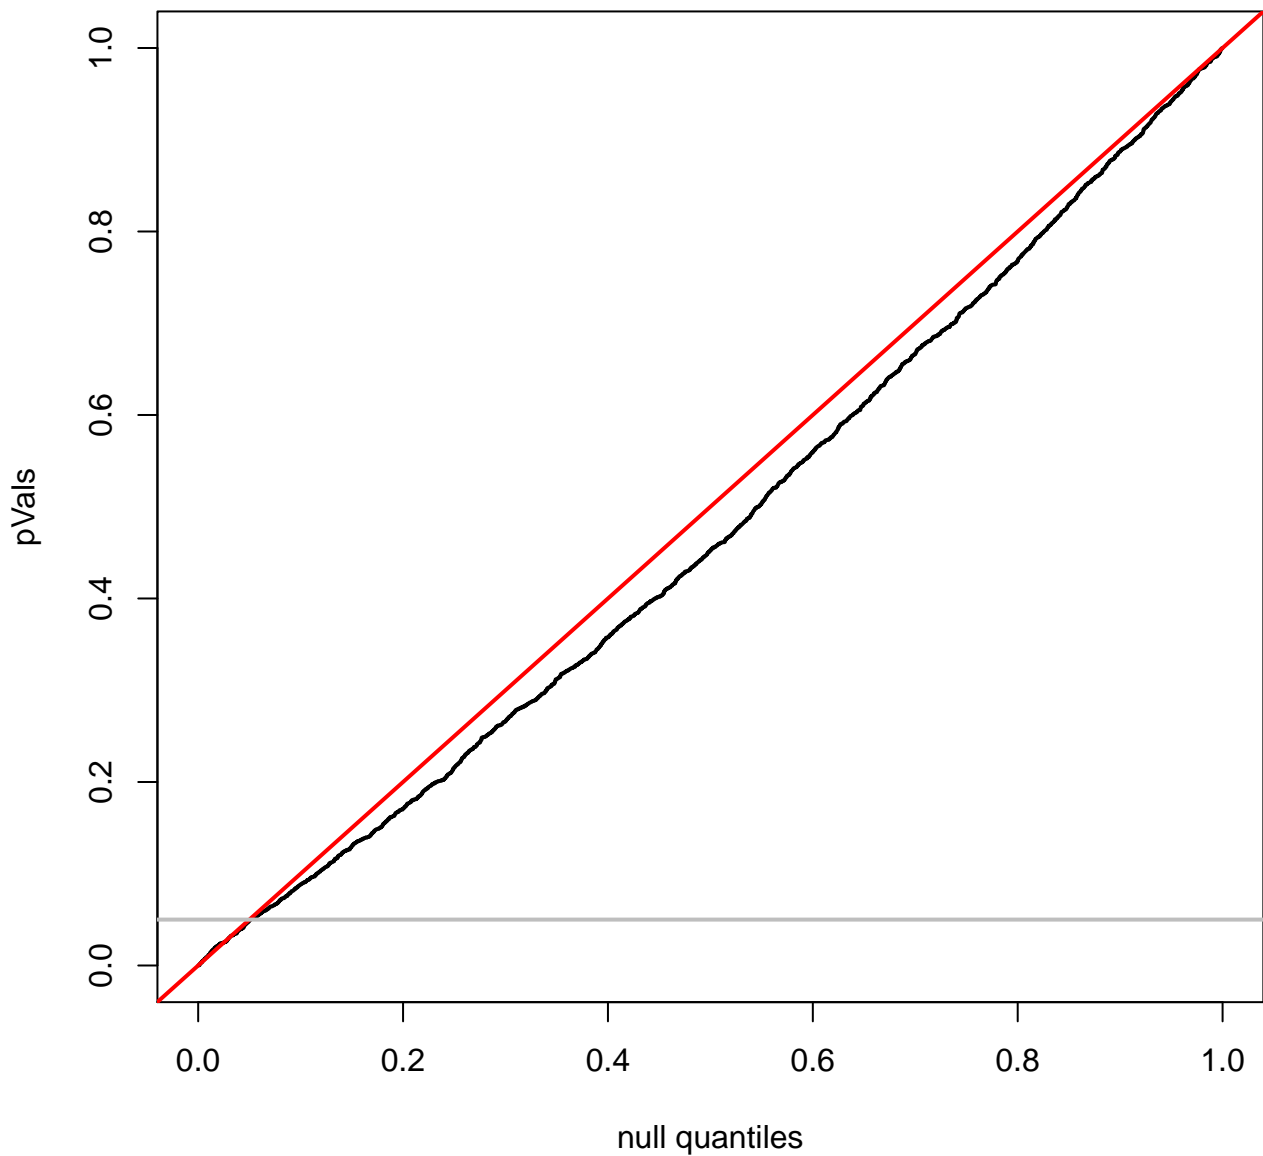

quantile plot for COADREAD  
(log-scale)

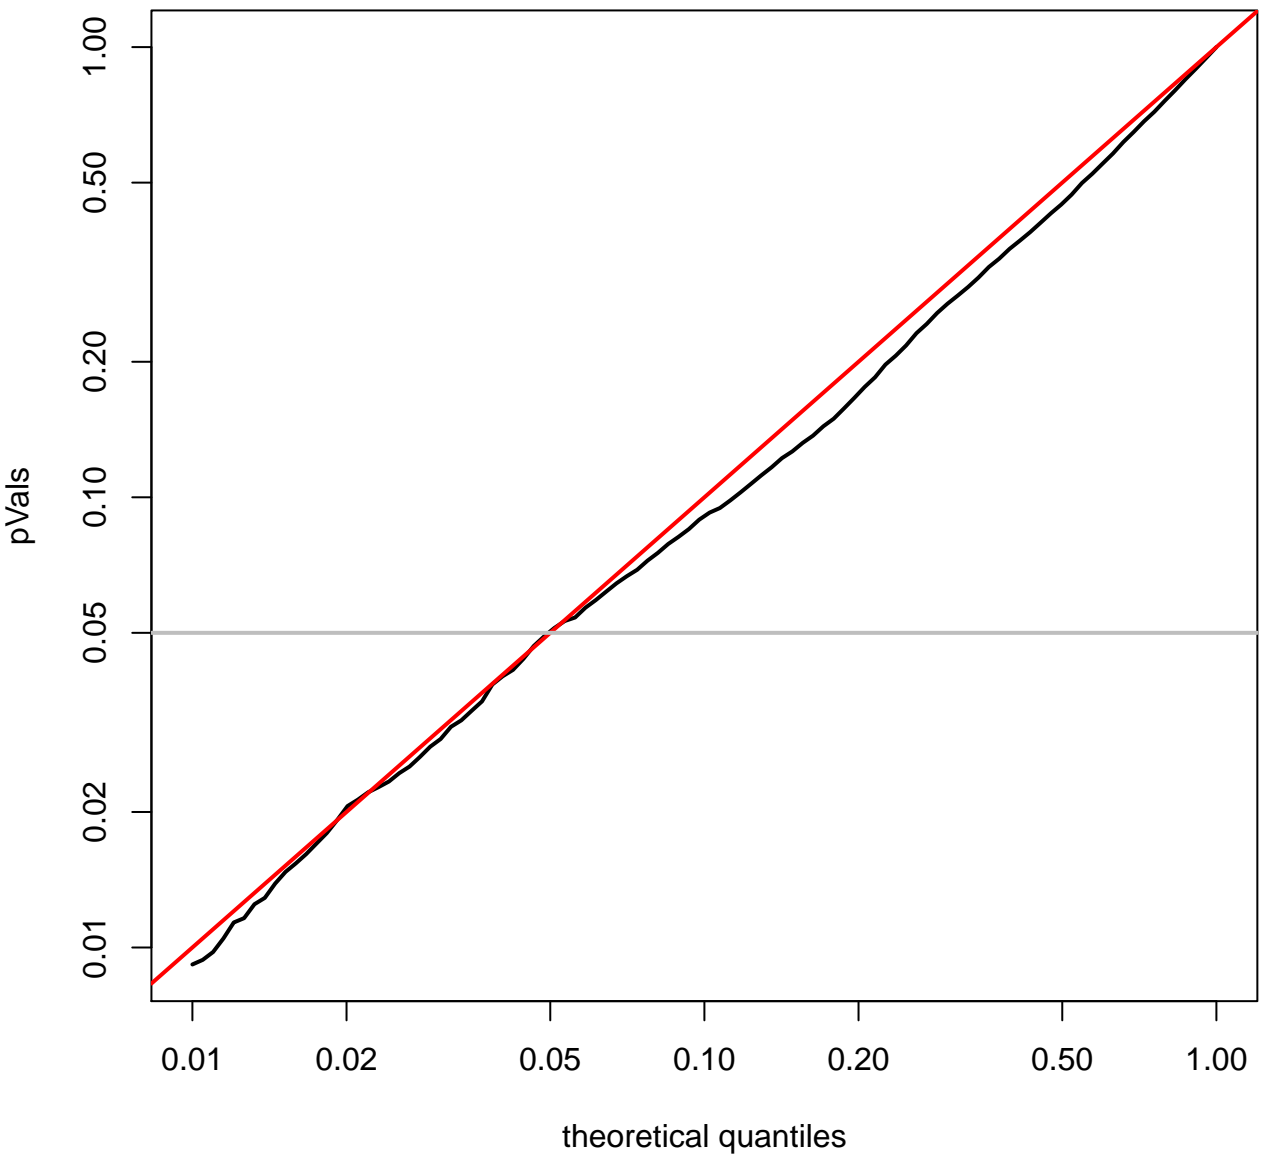

# Cumulative p-value distribution for COADREAD

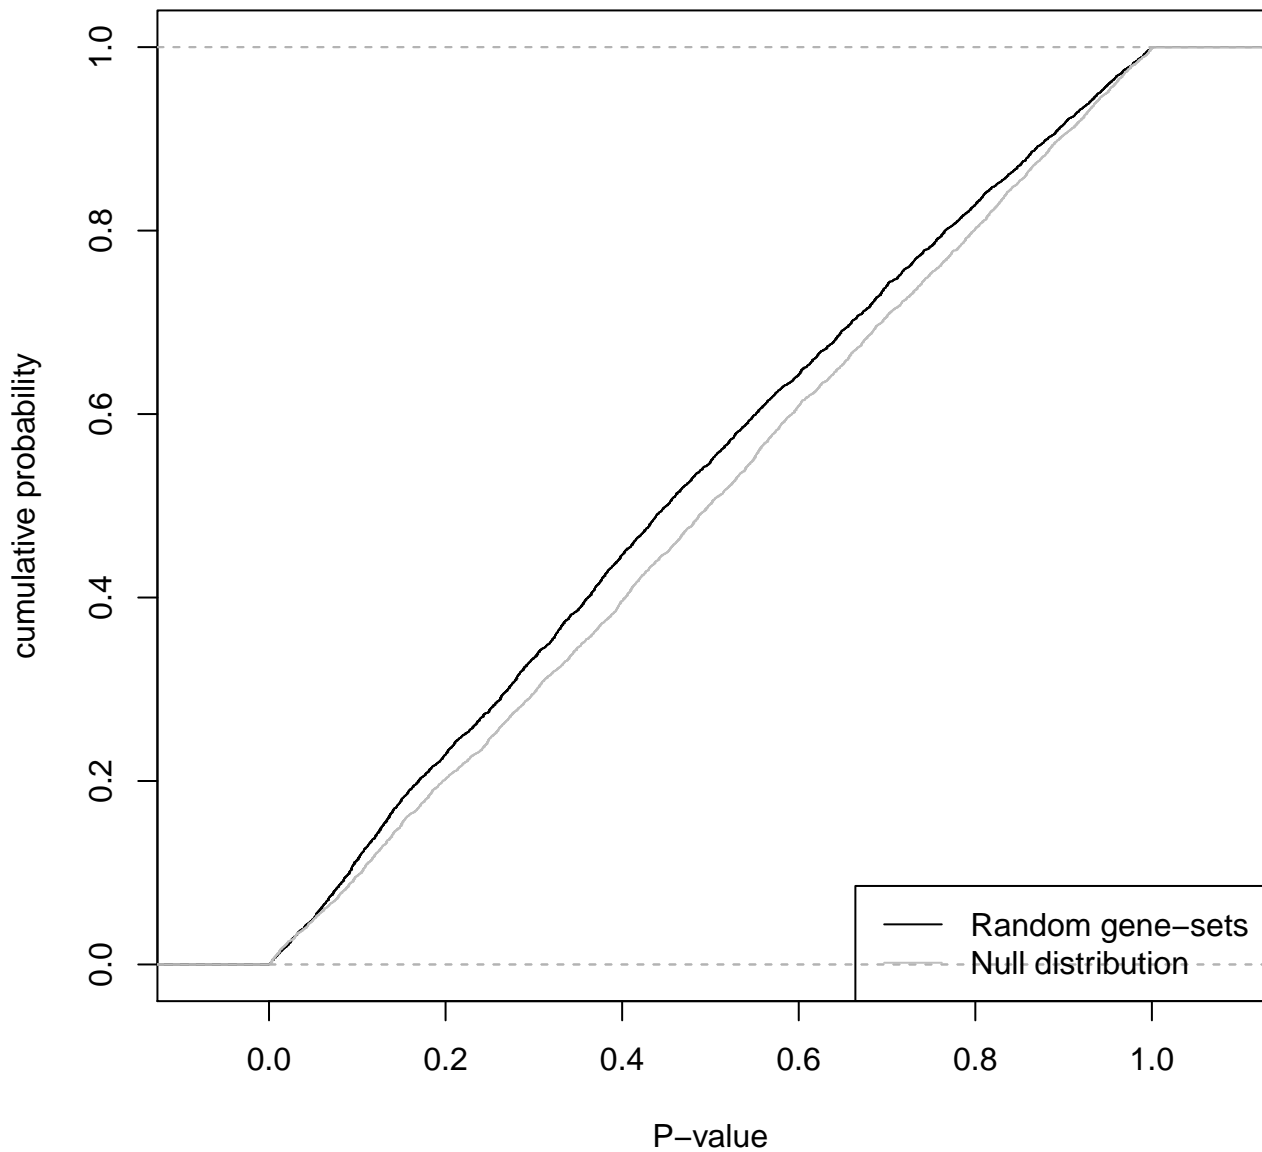

# Histogram for pVals for DLBC

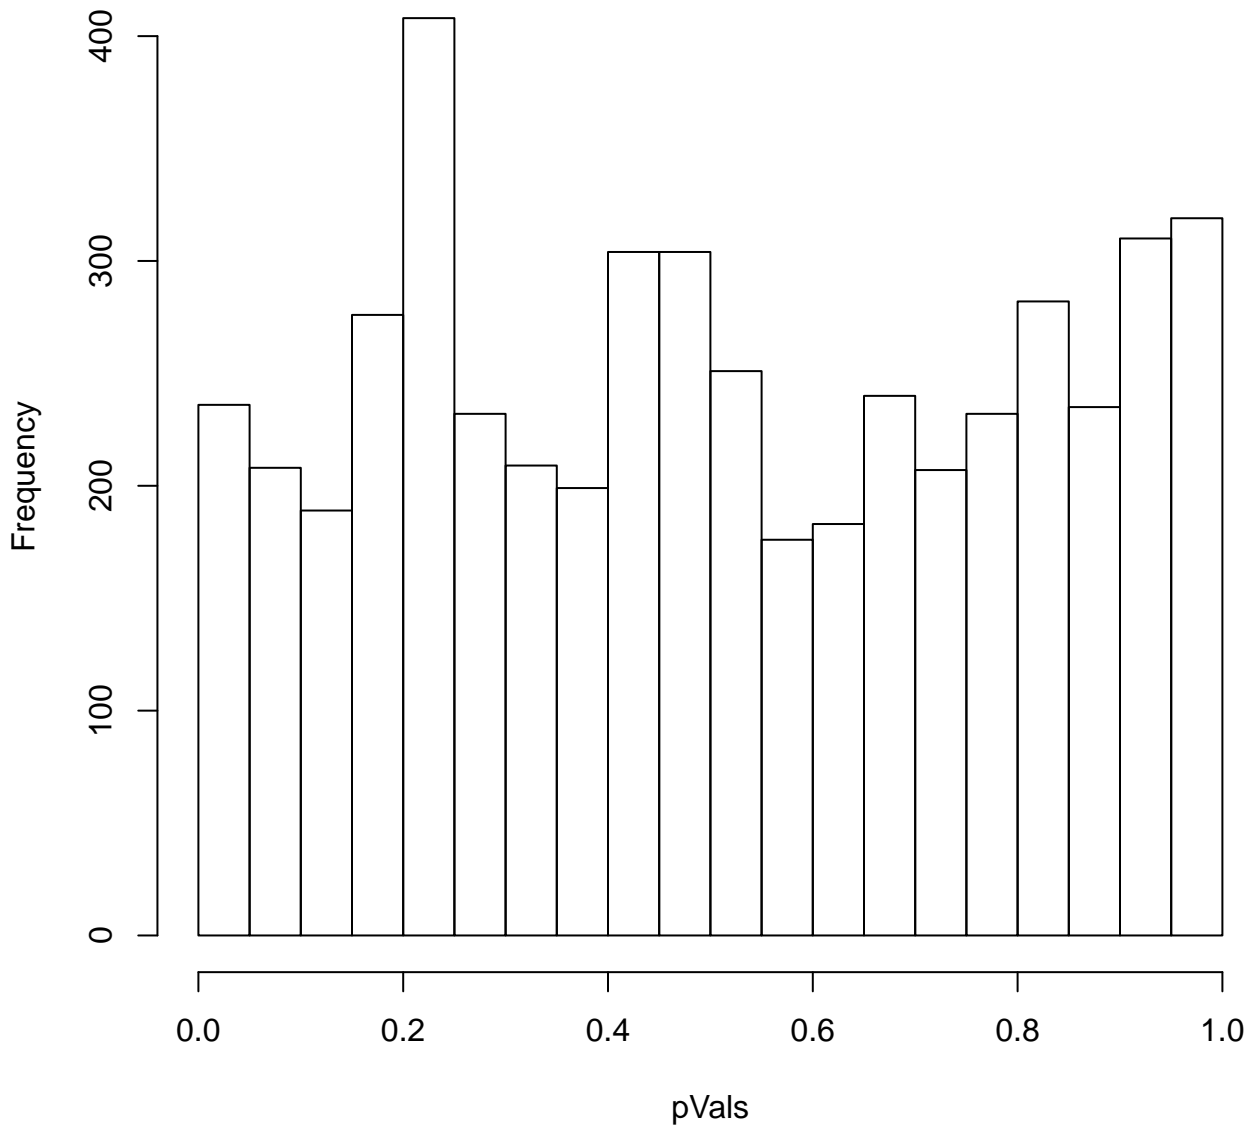

quantile plot for DLBC

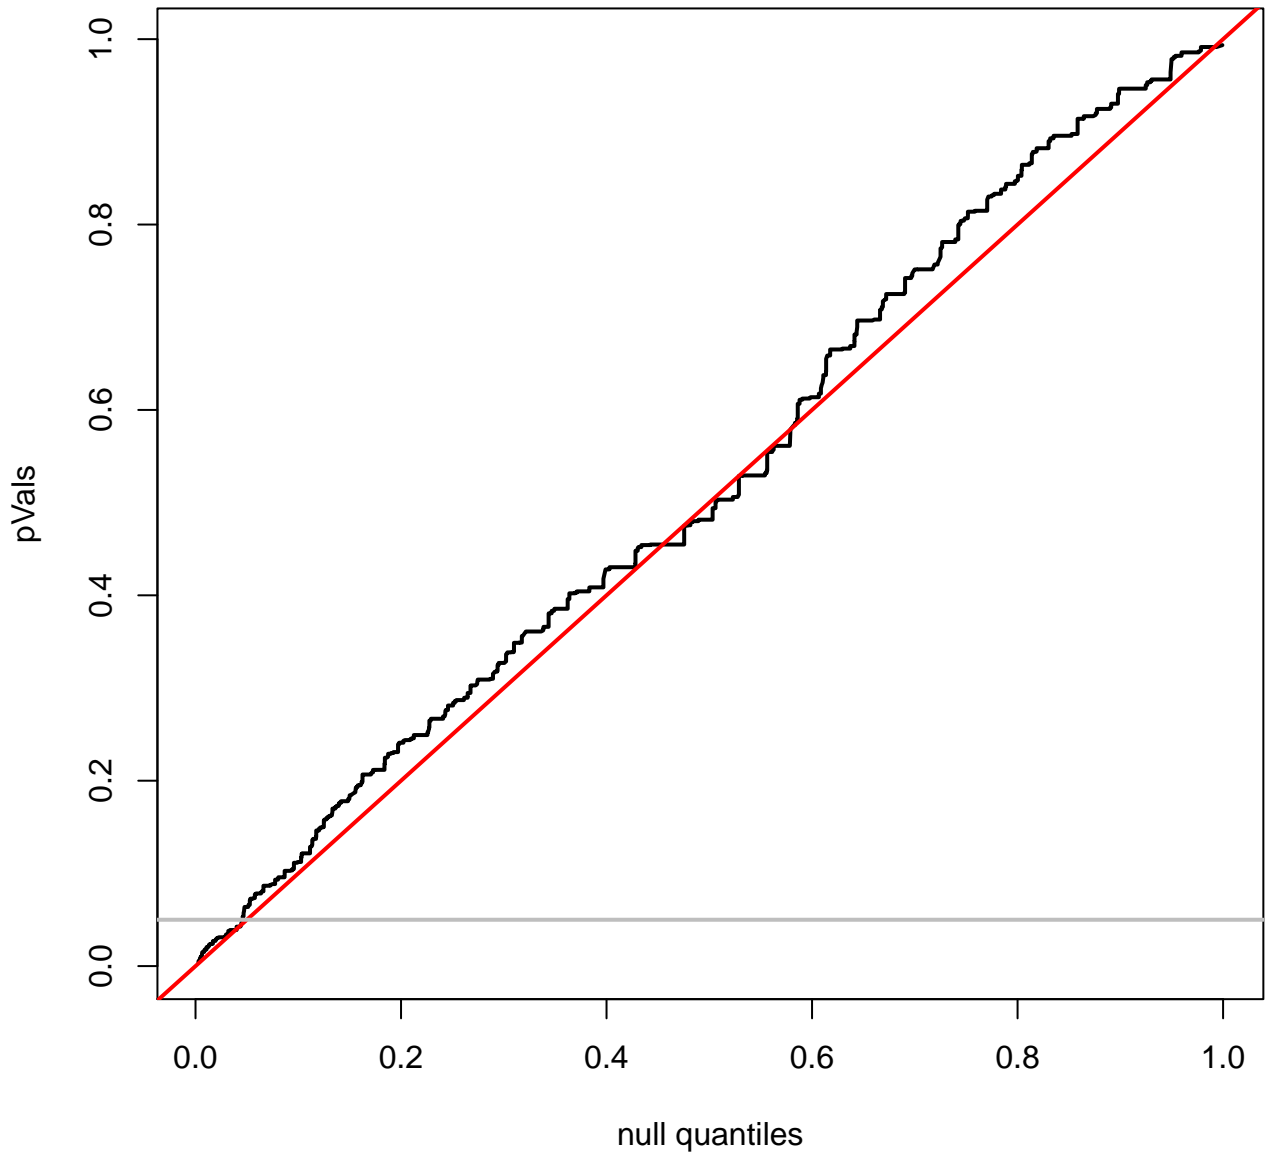

quantile plot for DLBC  
(log-scale)

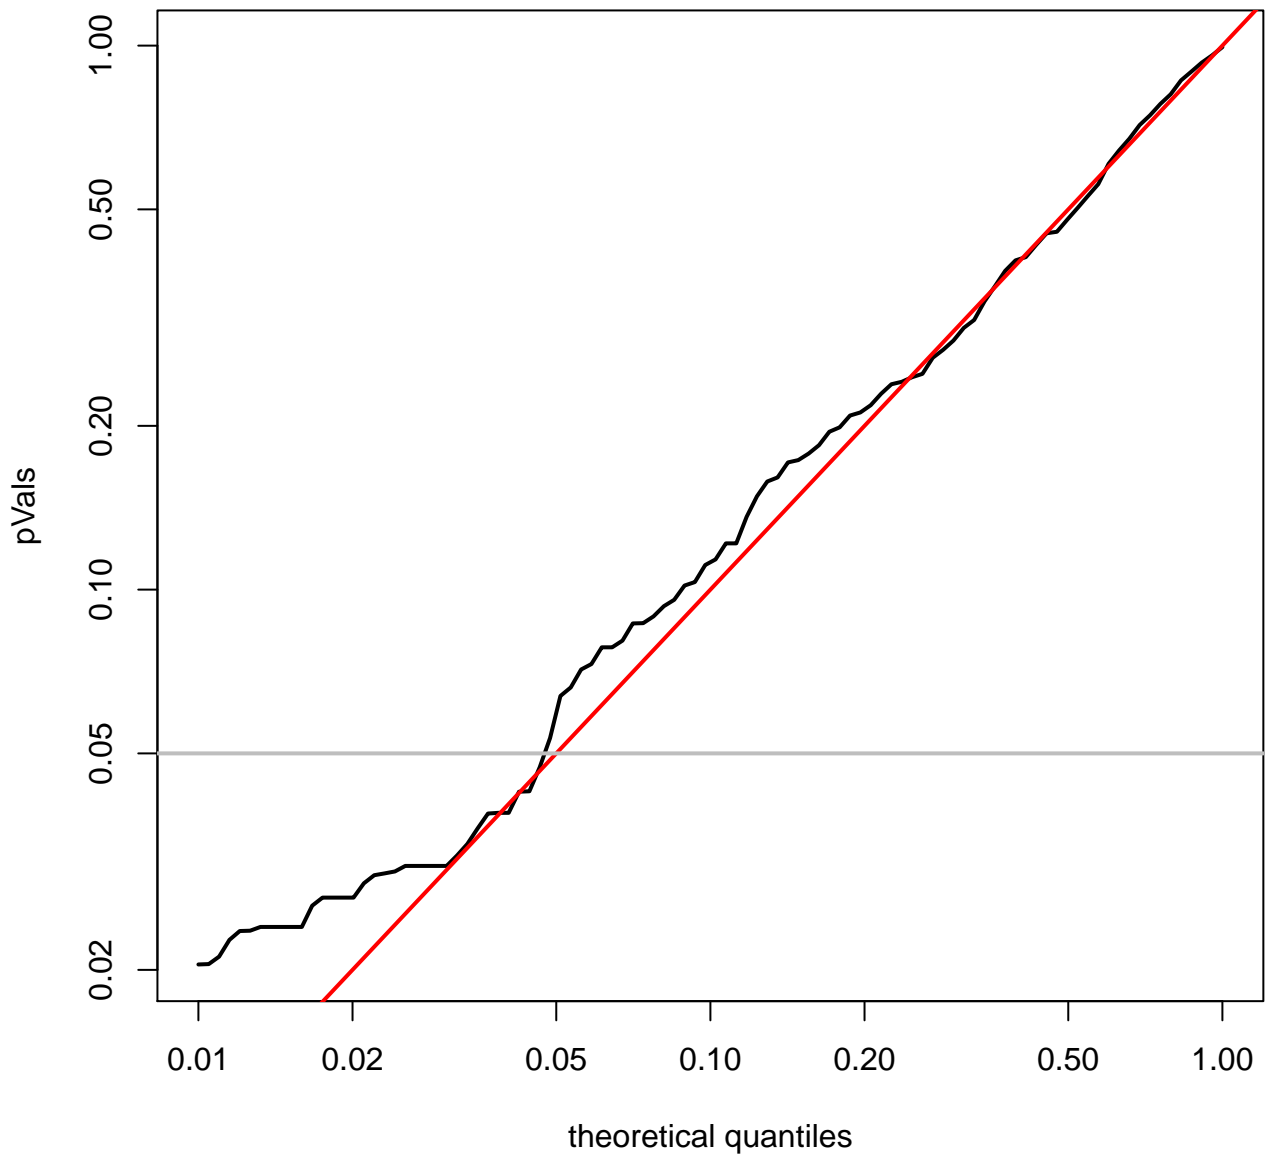

# Cumulative p-value distribution for DLBC

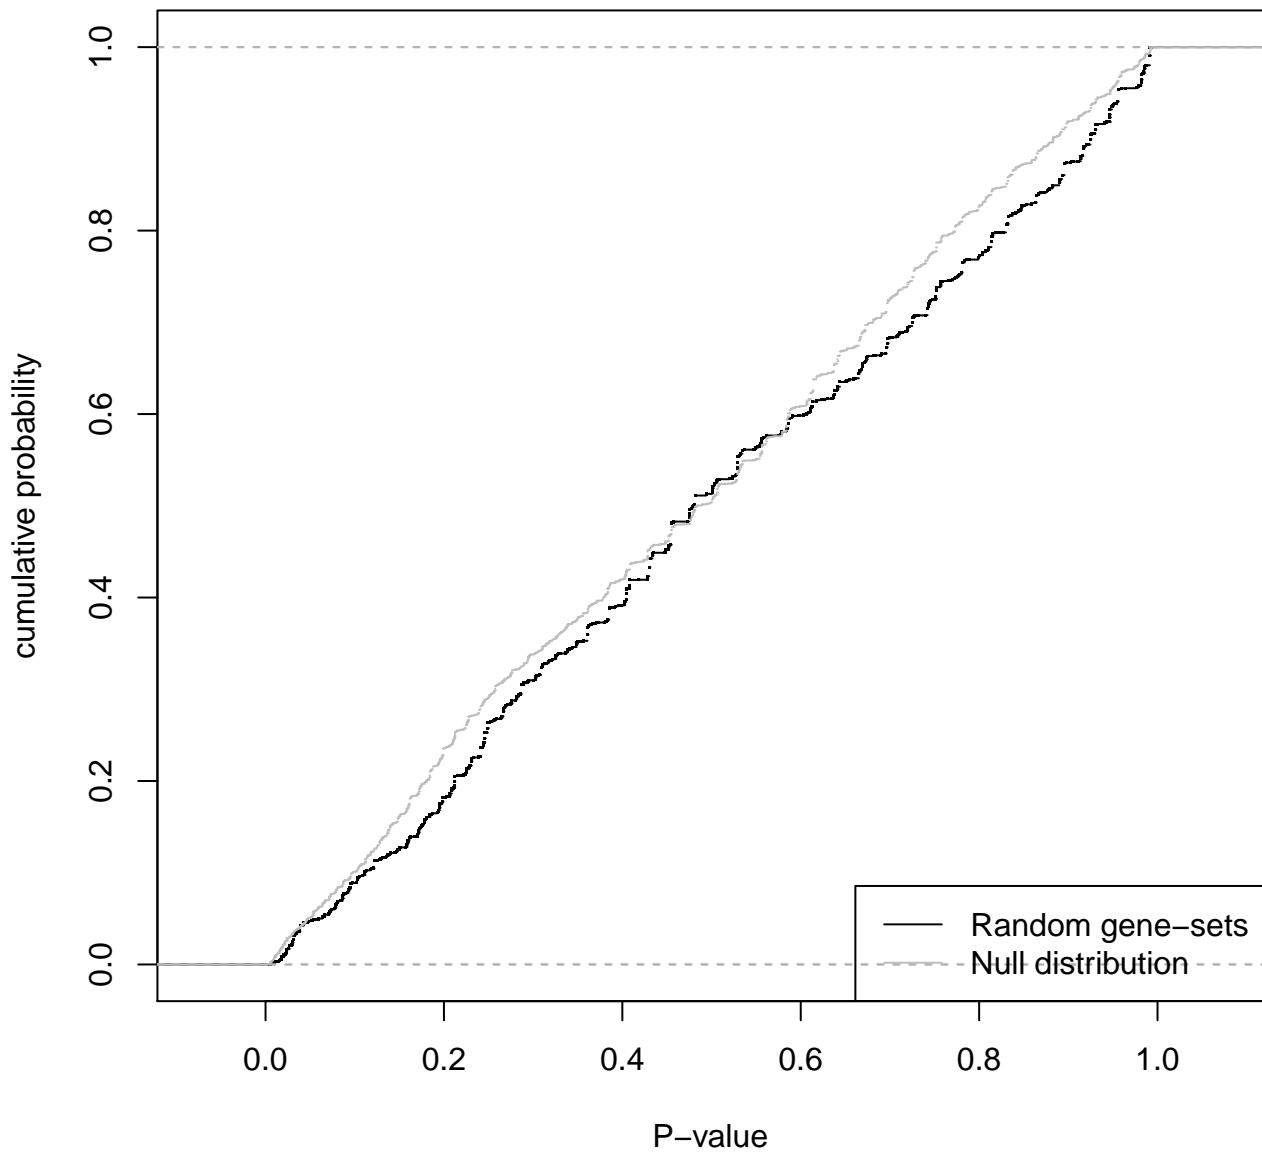



# Histogram for pVals for ESCA

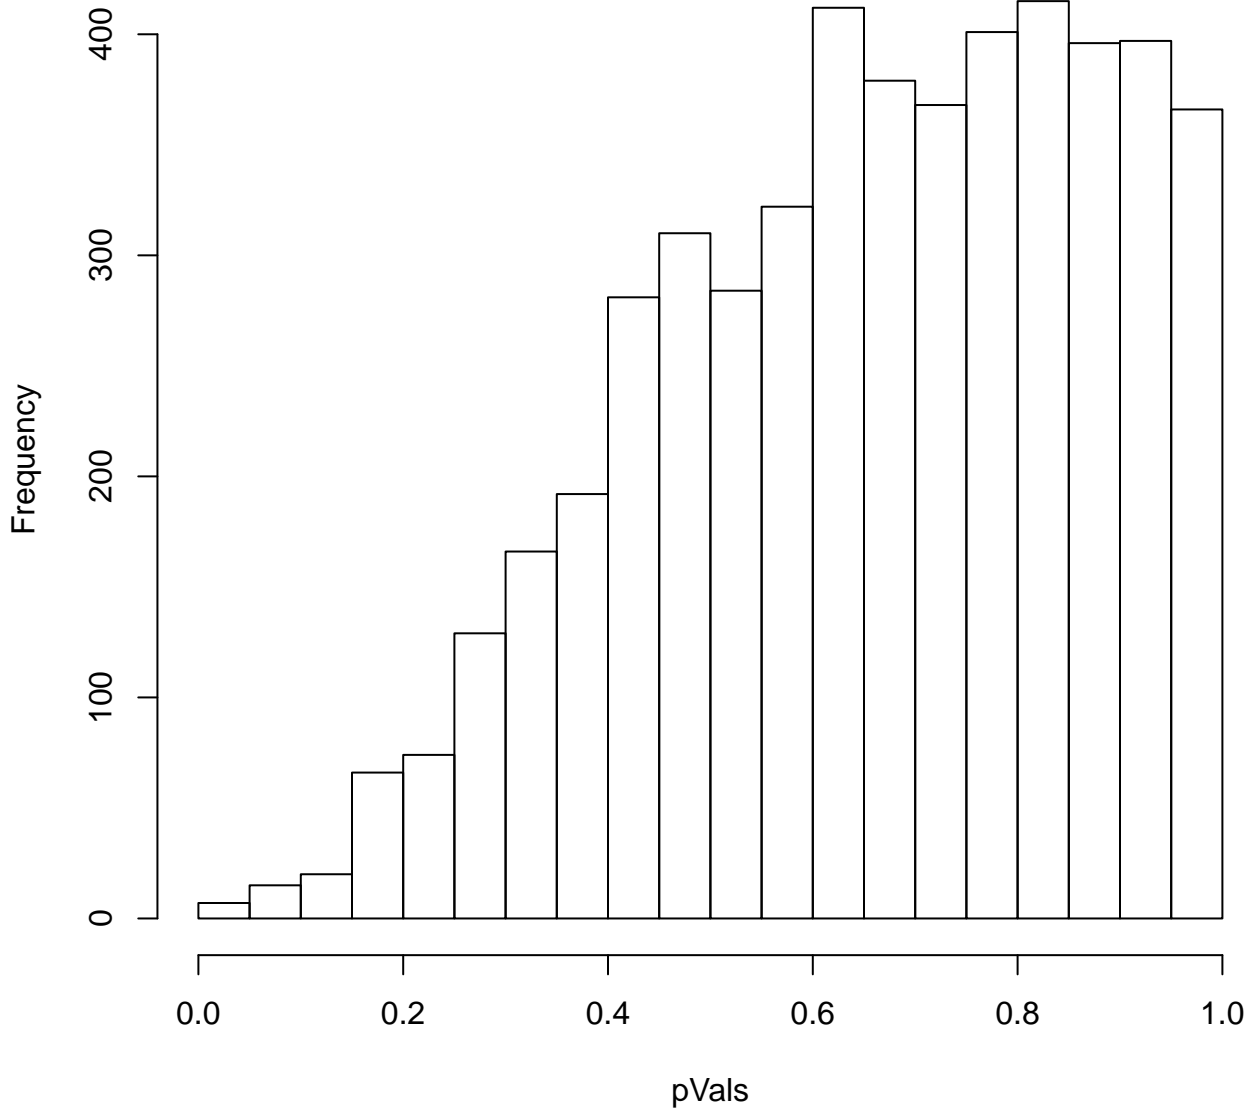

quantile plot for ESCA

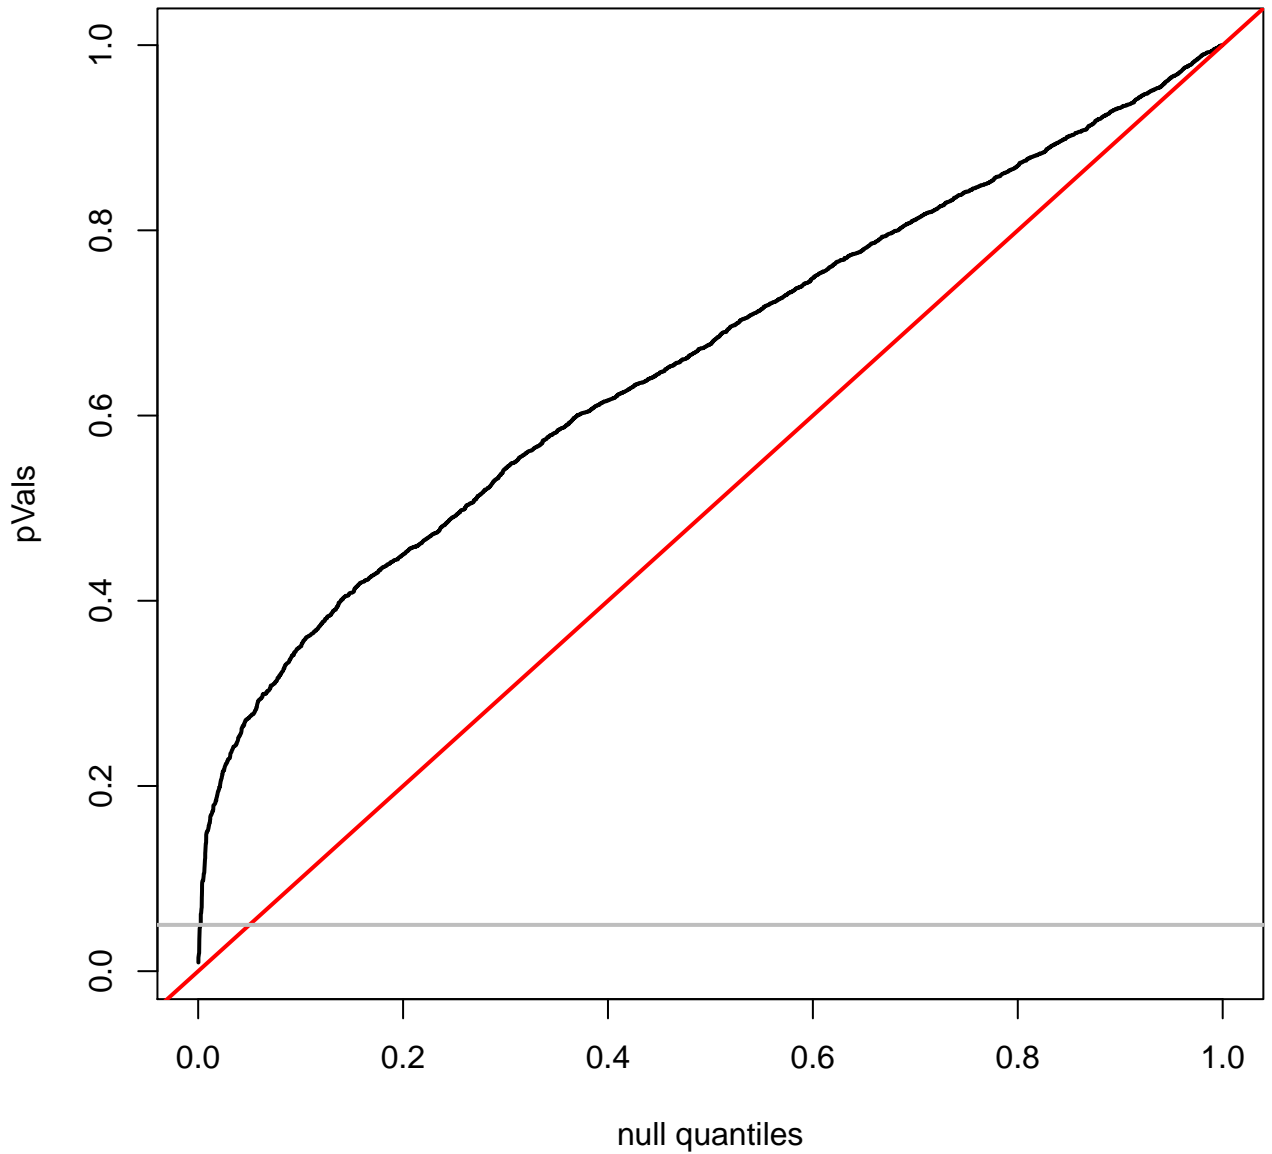

quantile plot for ESCA  
(log-scale)

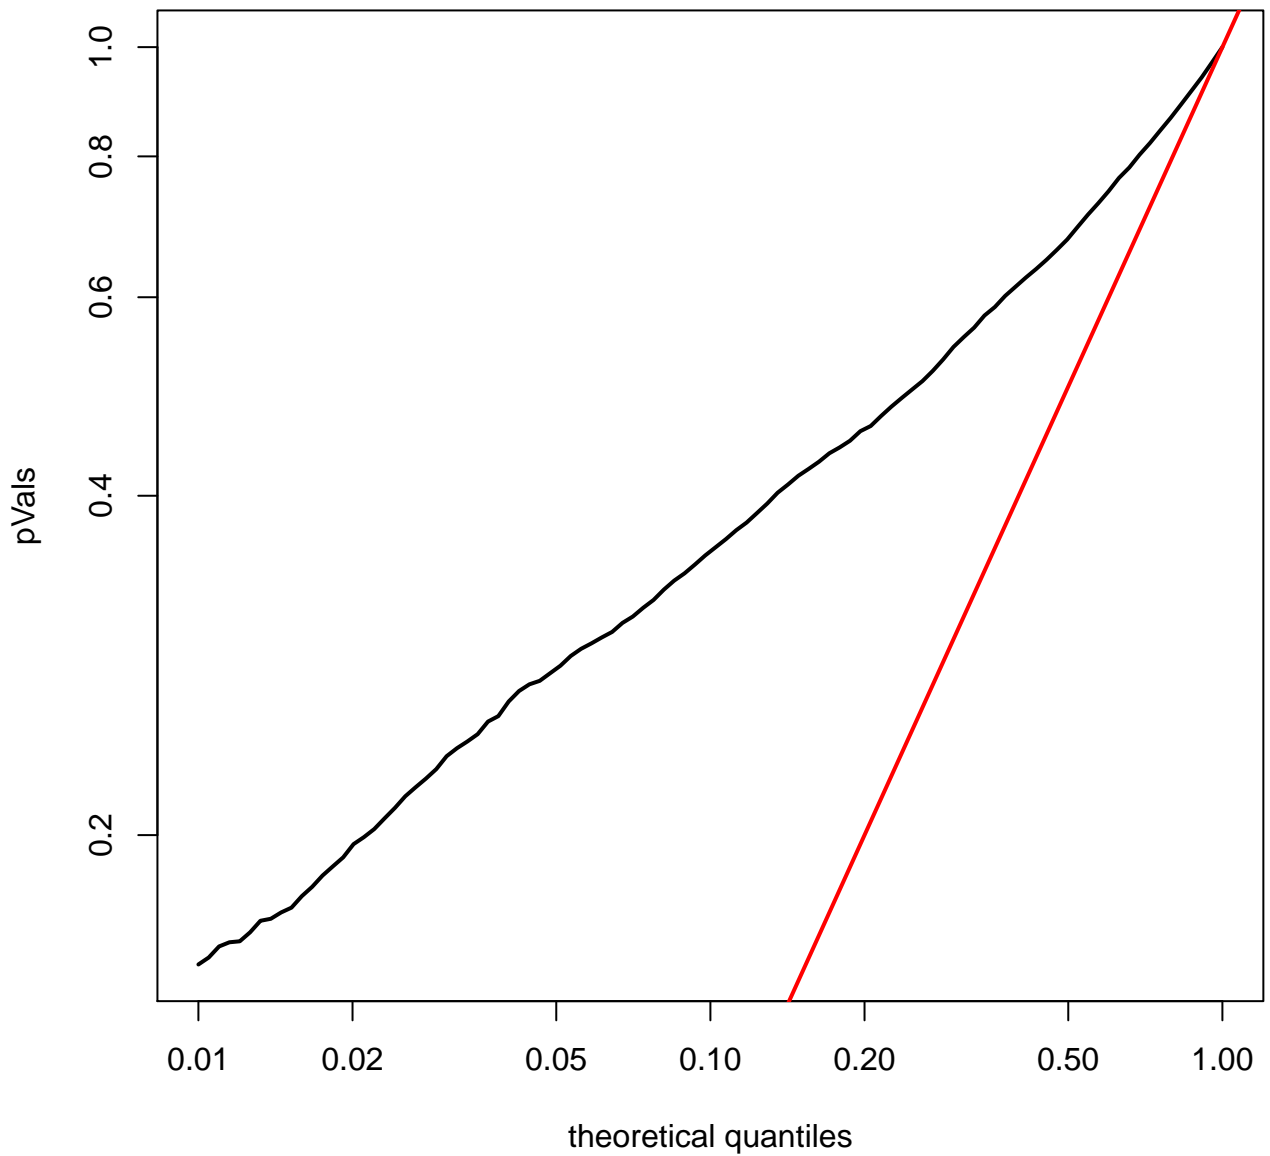

# Cumulative p-value distribution for ESCA

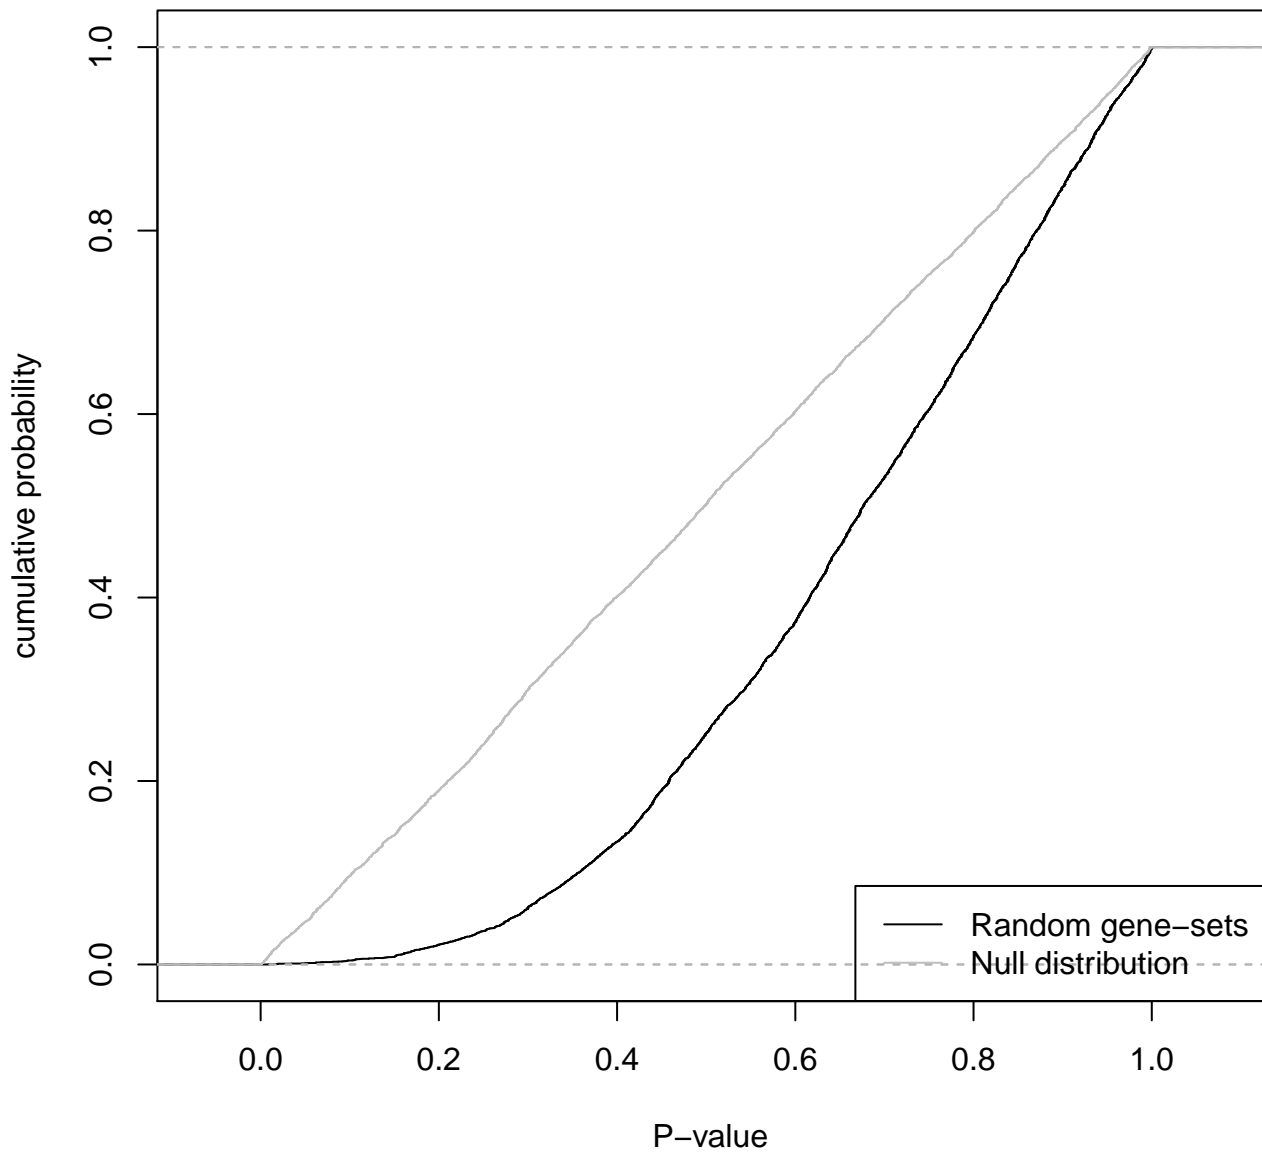

# Histogram for pVals for GBM

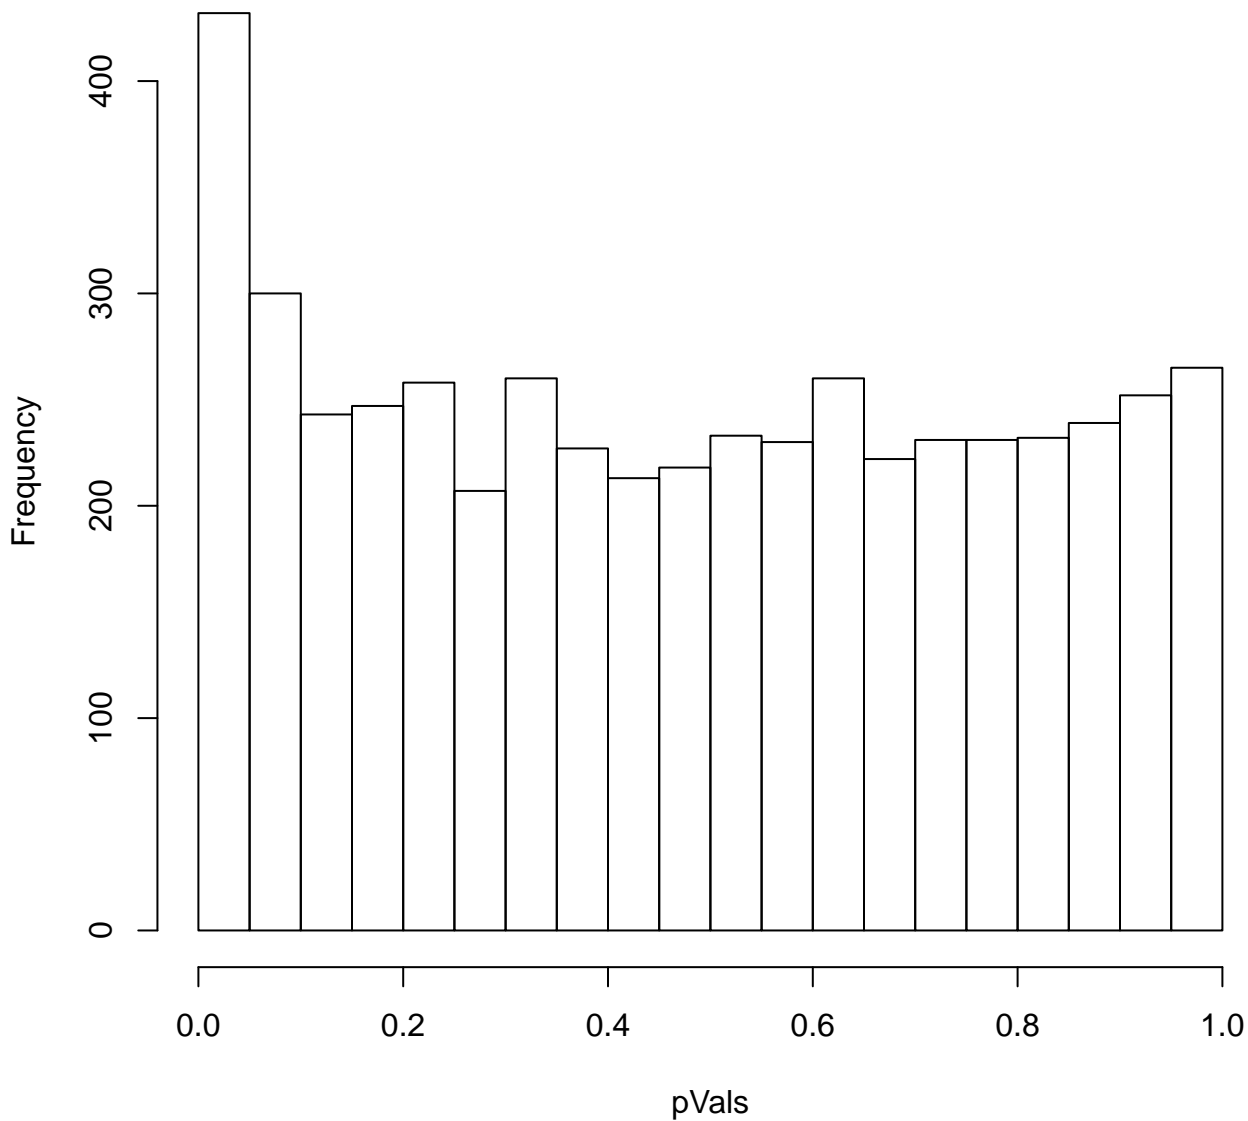

quantile plot for GBM

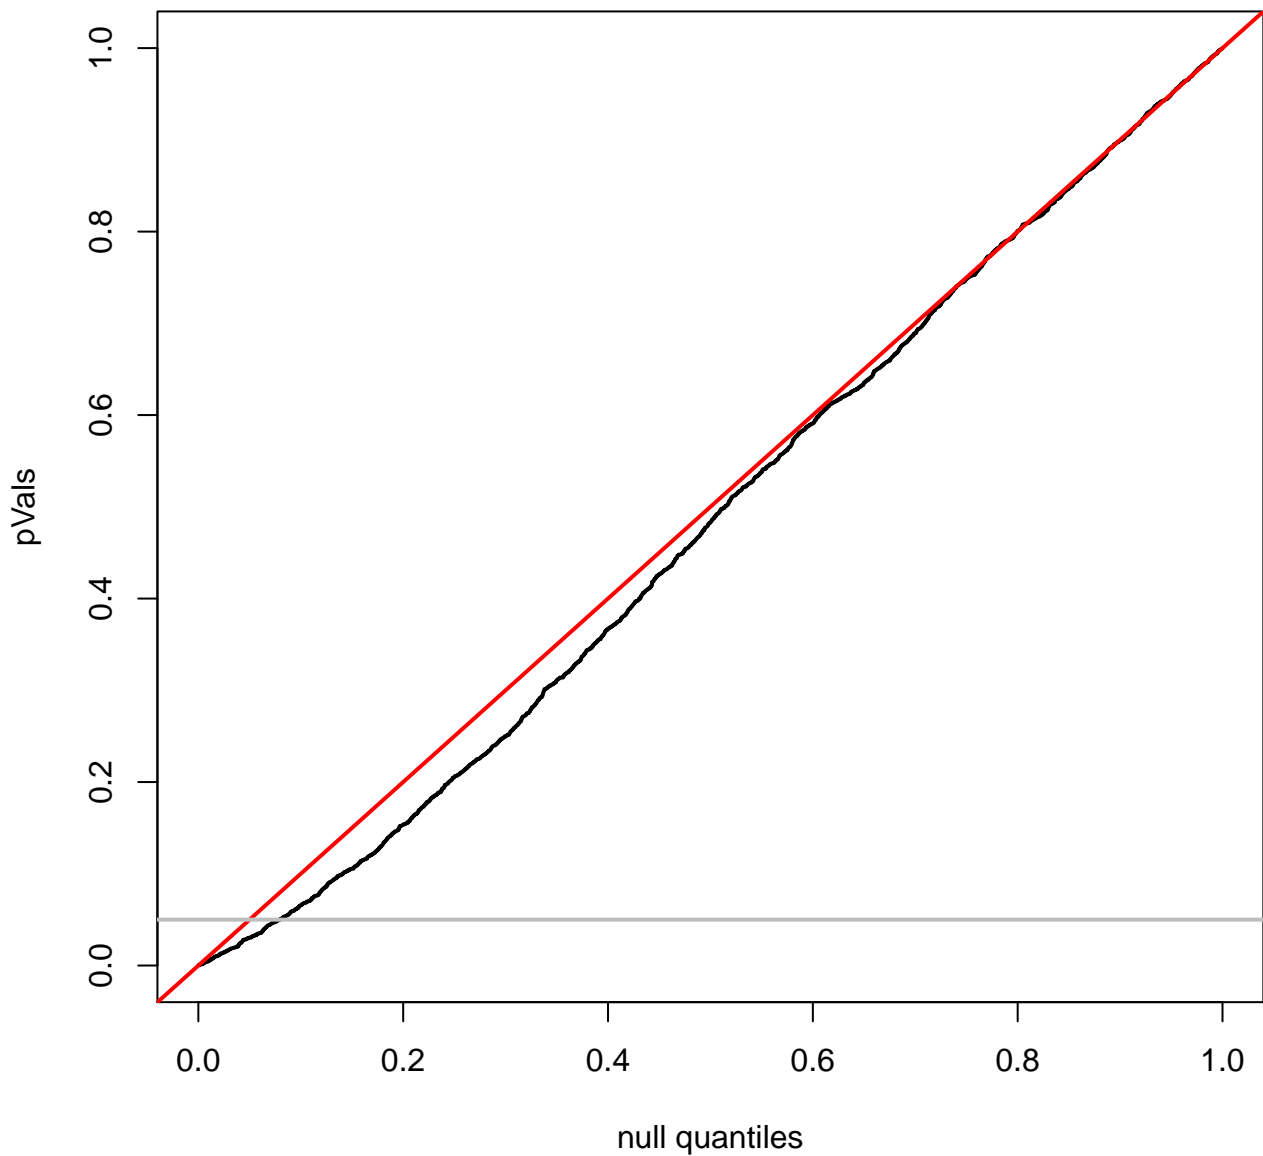

quantile plot for GBM  
(log-scale)

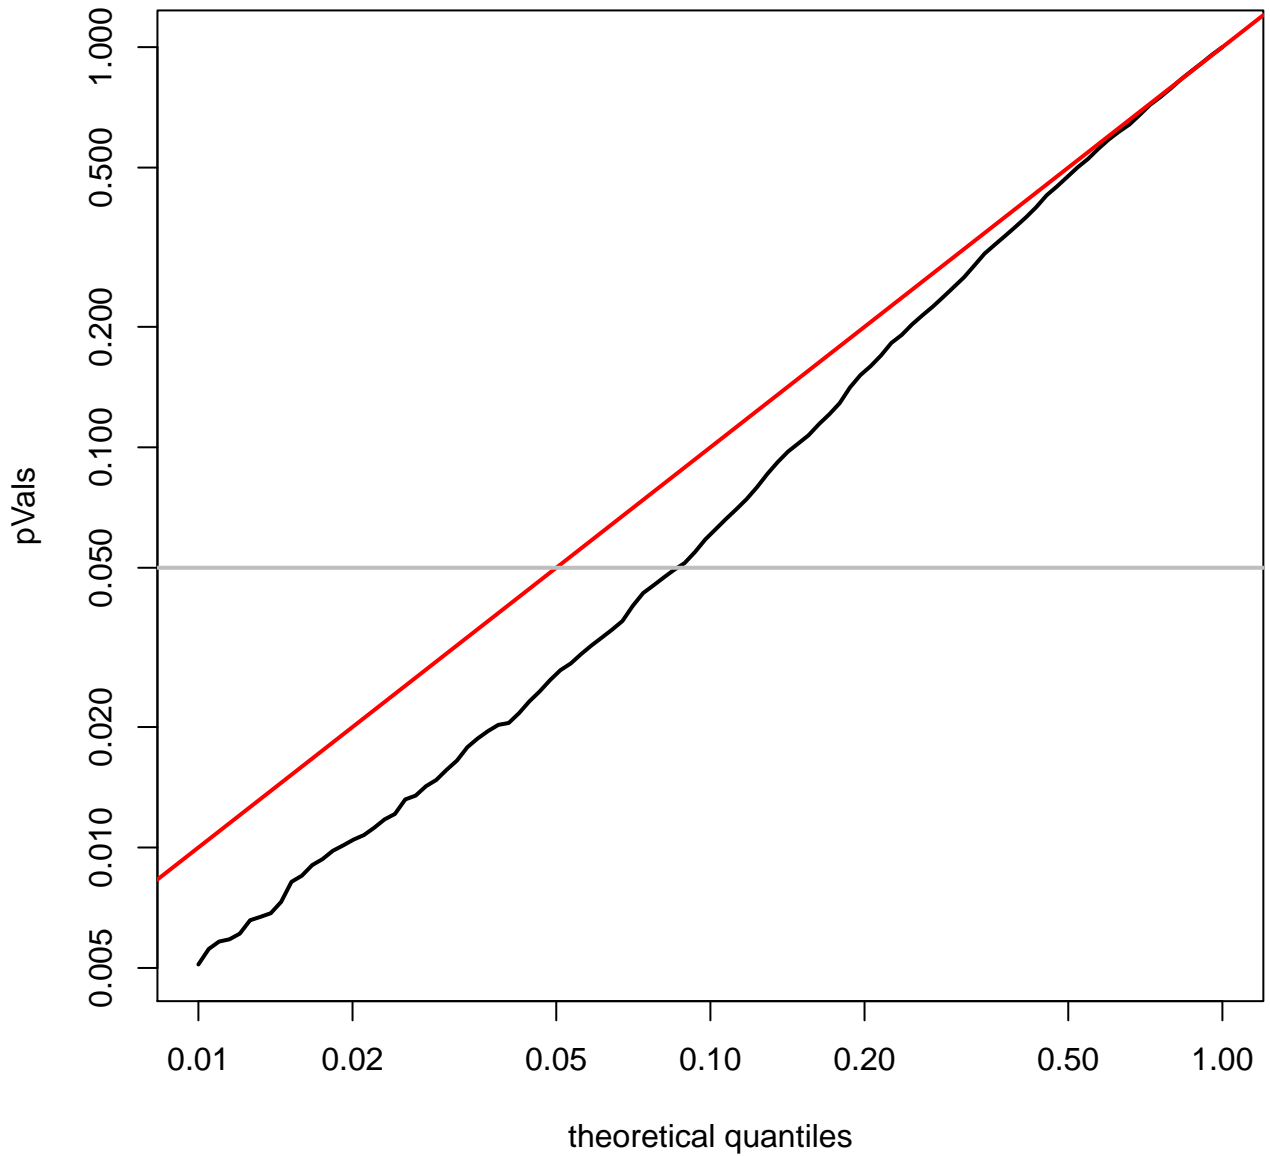

# Cumulative p-value distribution for GBM

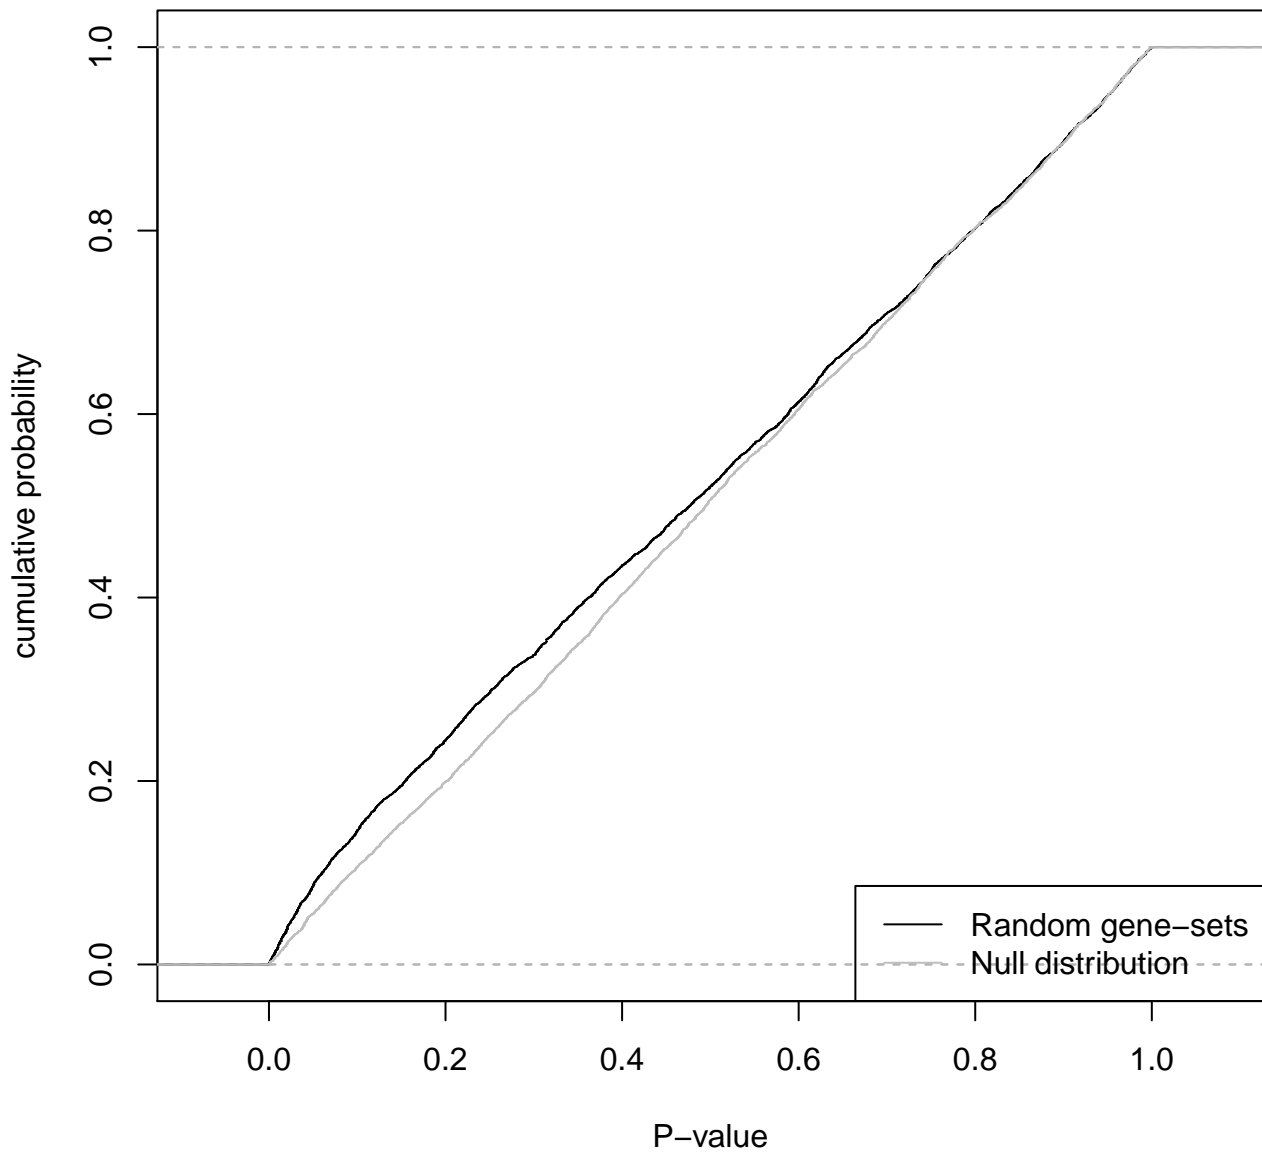



# Histogram for pVals for GBMLGG

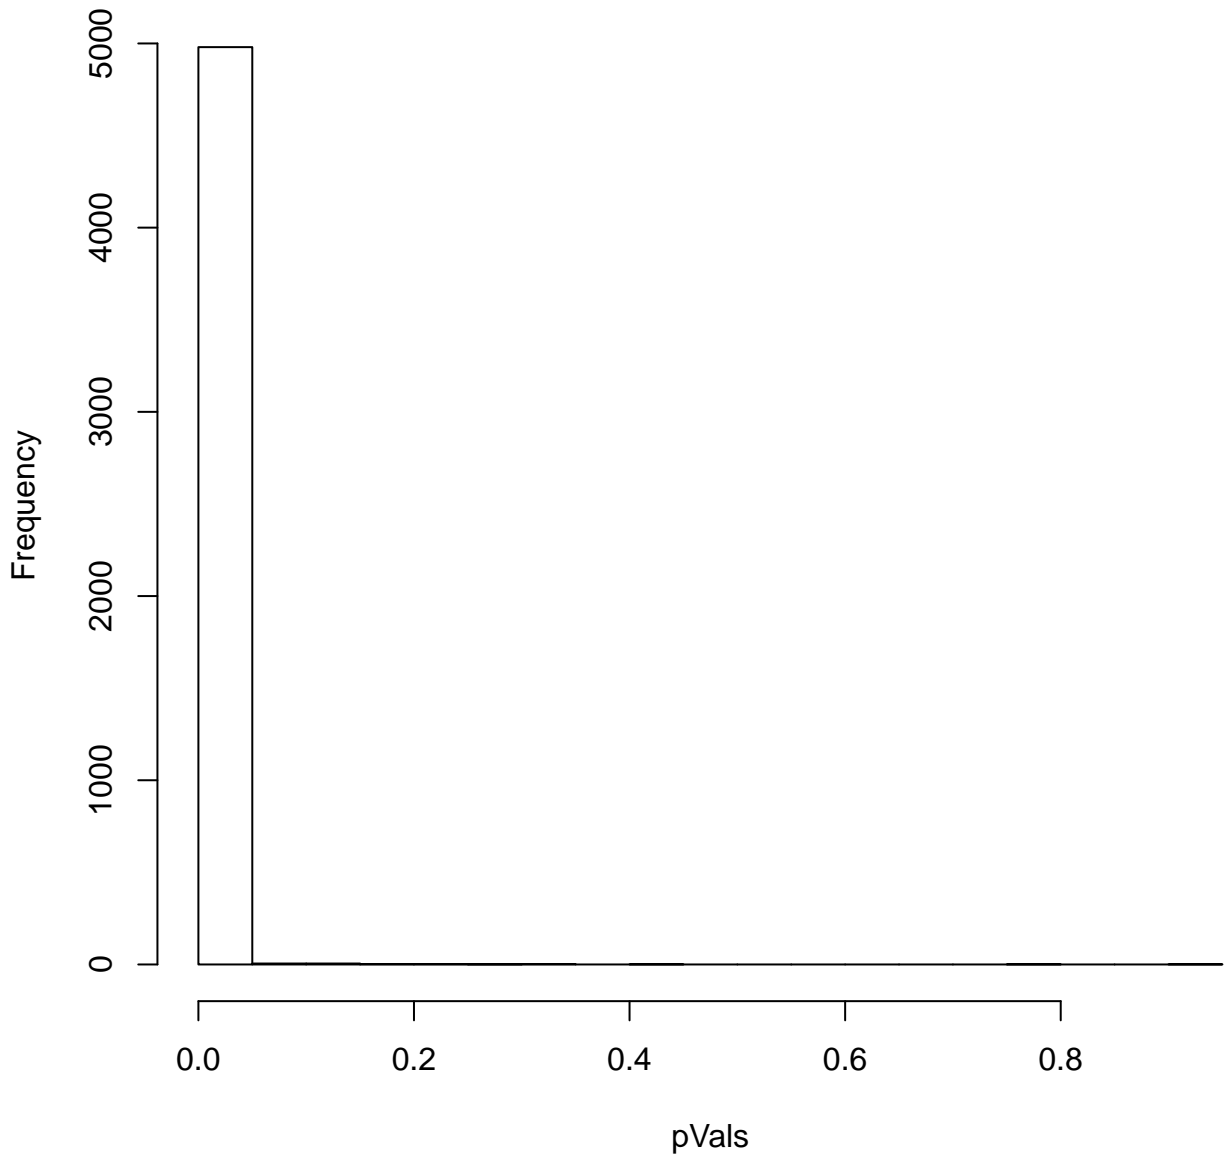

quantile plot for GBMLGG

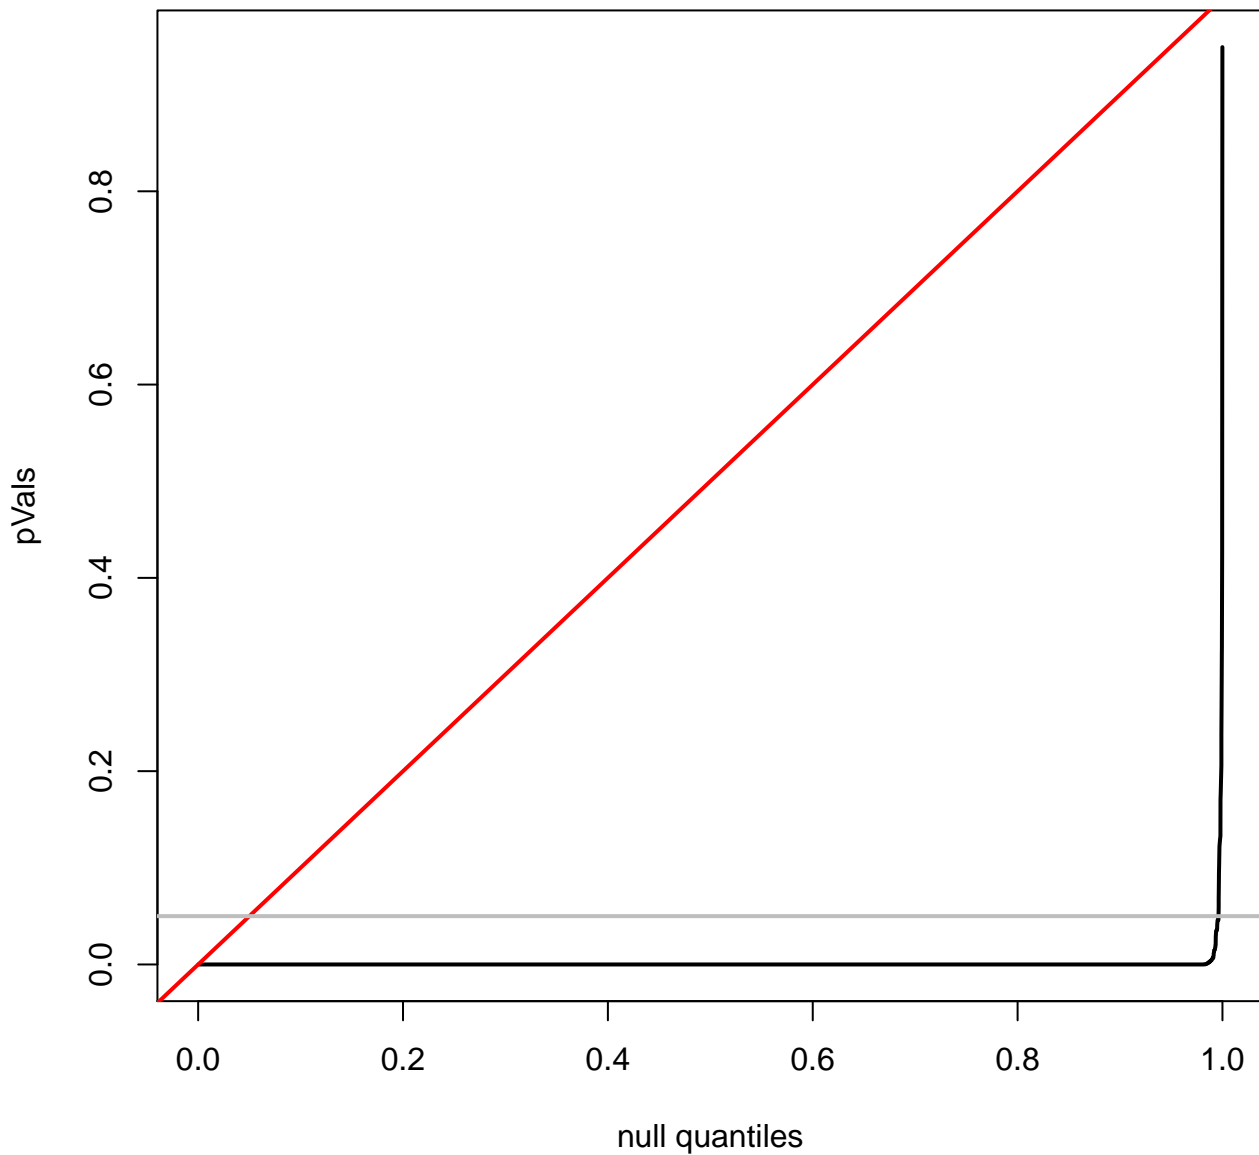

quantile plot for GBMLGG  
(log-scale)

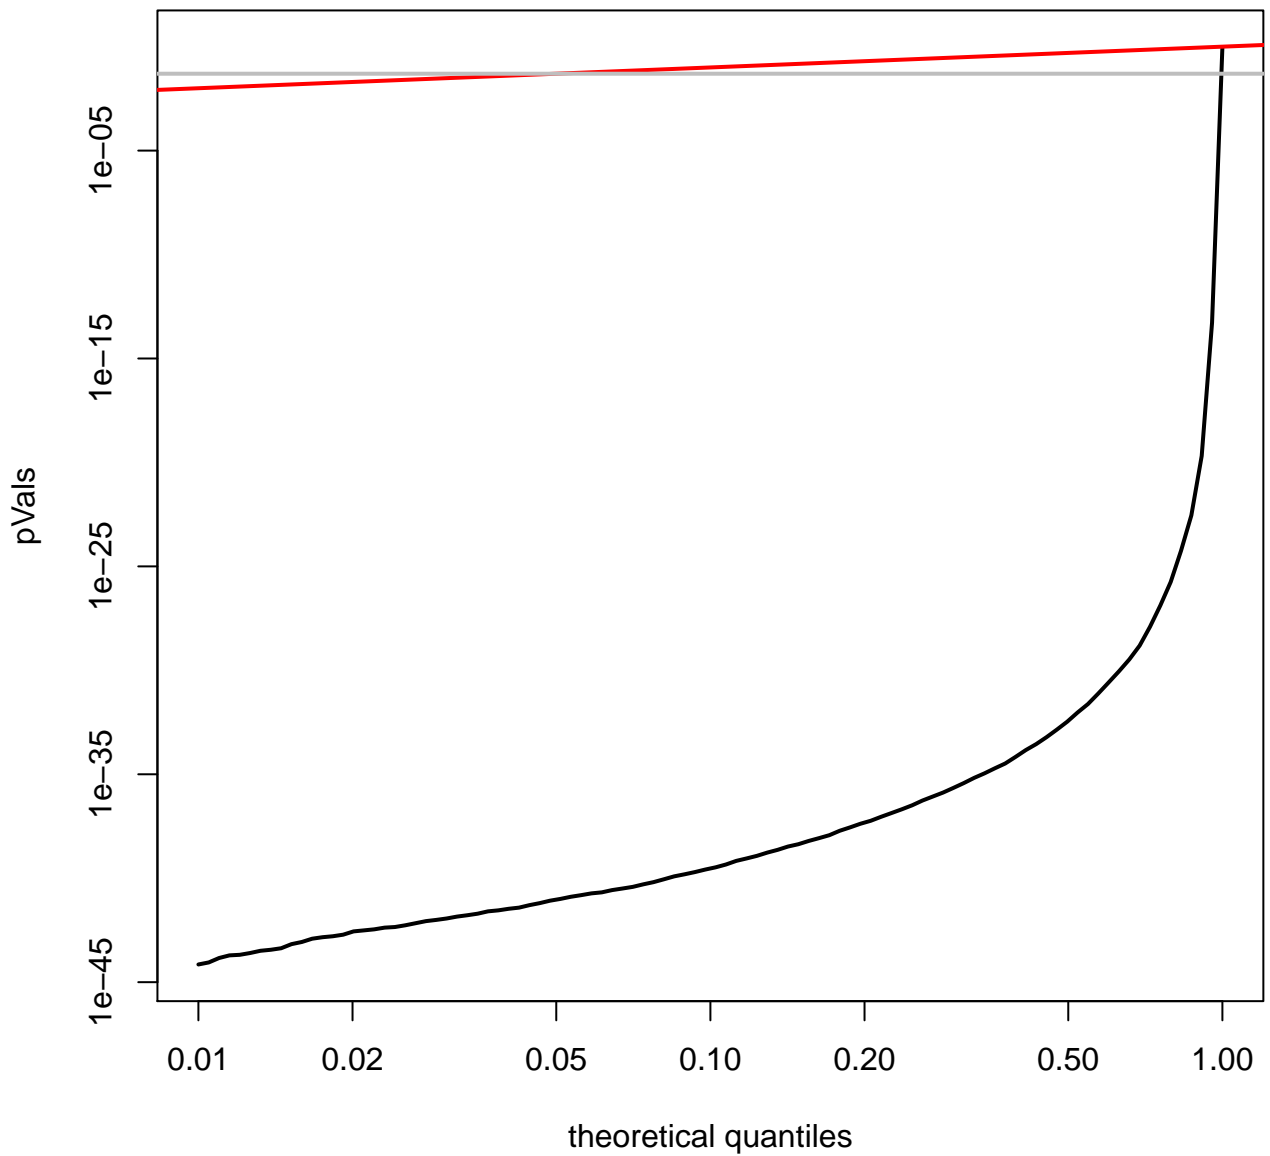

# Cumulative p-value distribution for GBMLGG

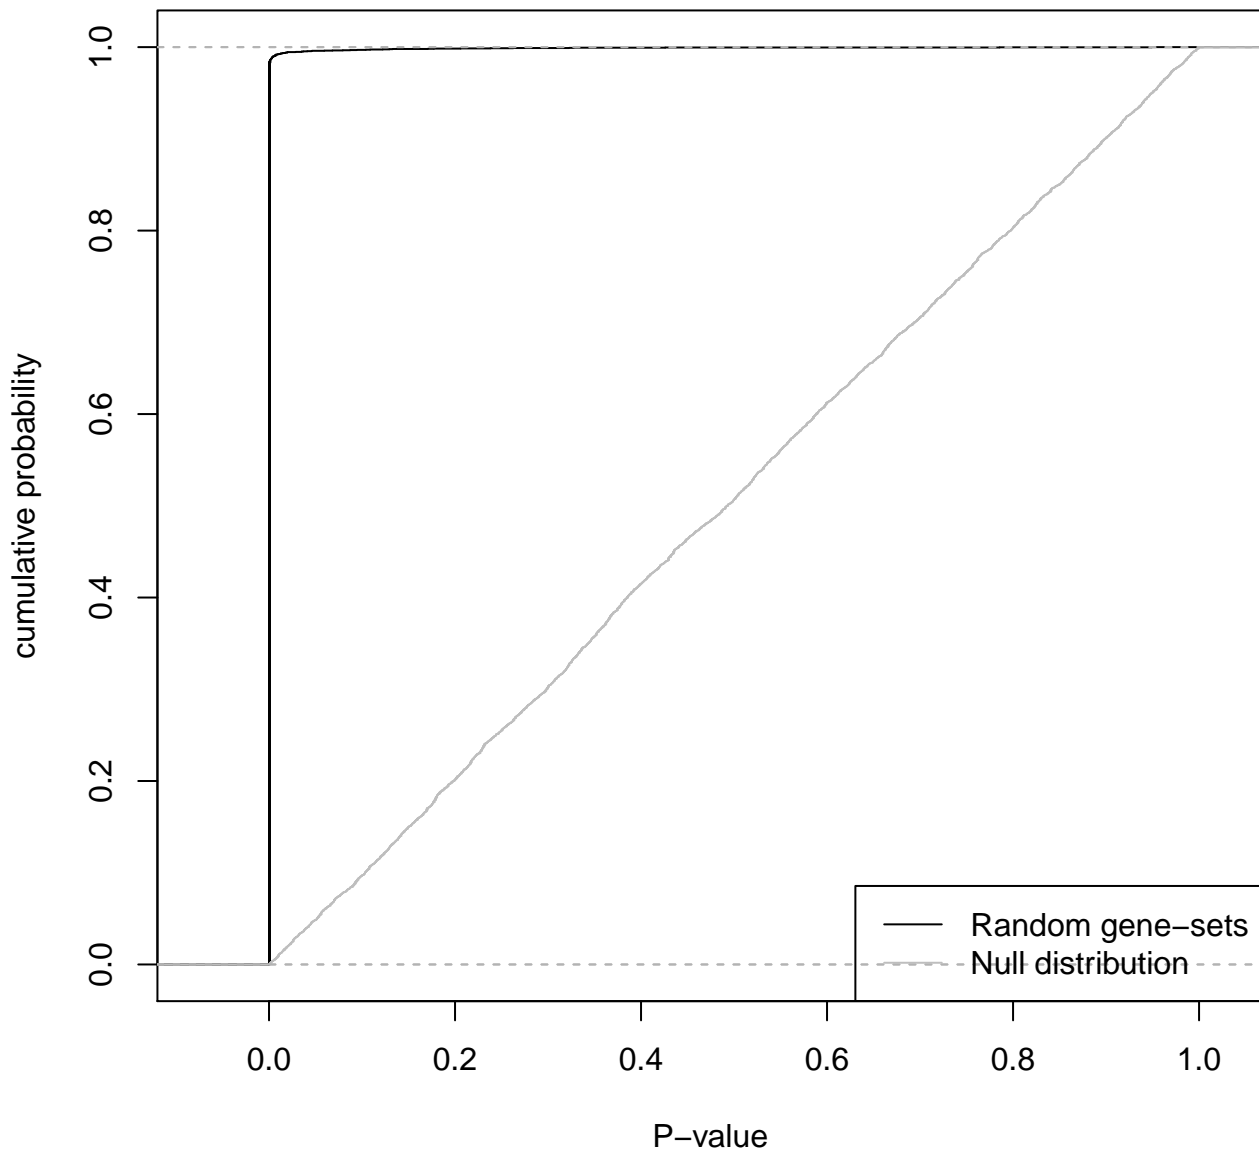

# Histogram for pVals for HNSC

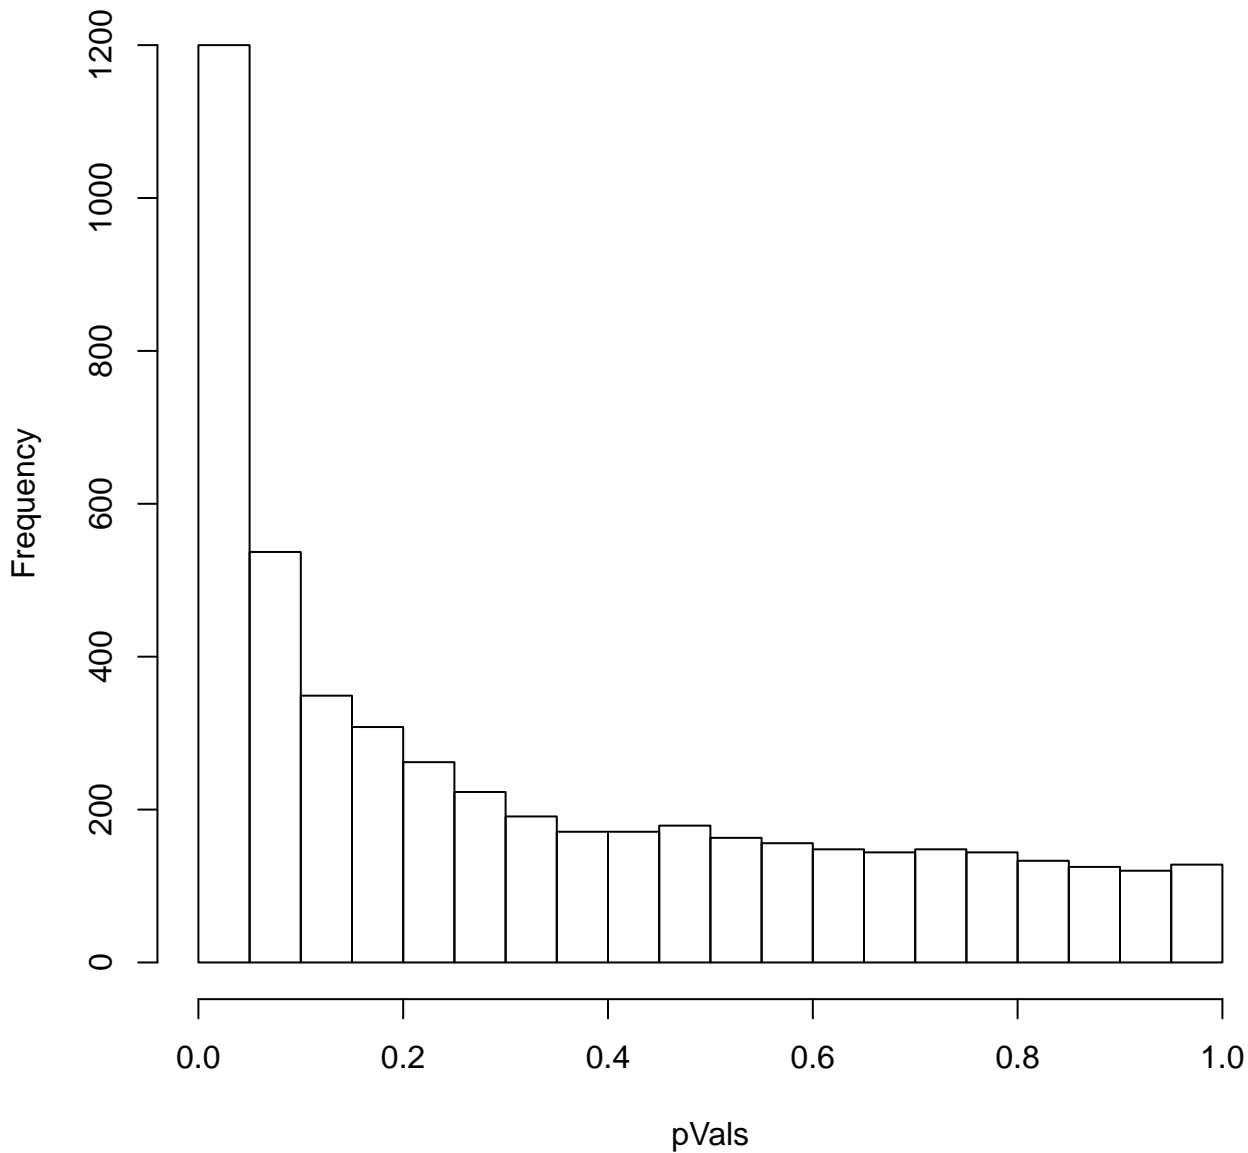

quantile plot for HNSC

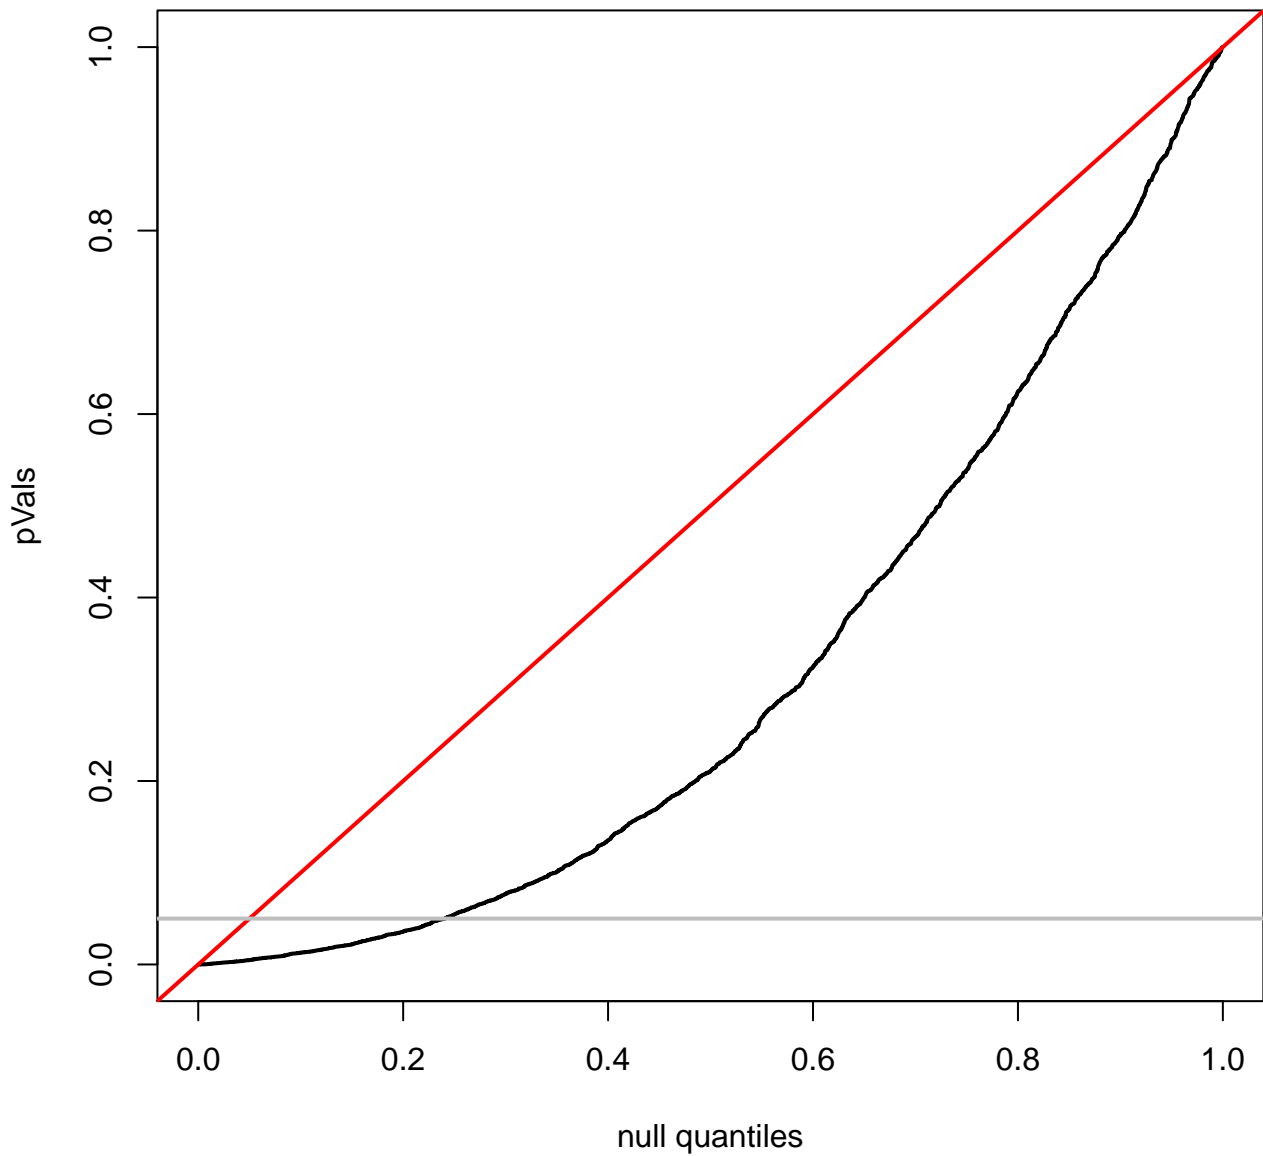

quantile plot for HNSC  
(log-scale)

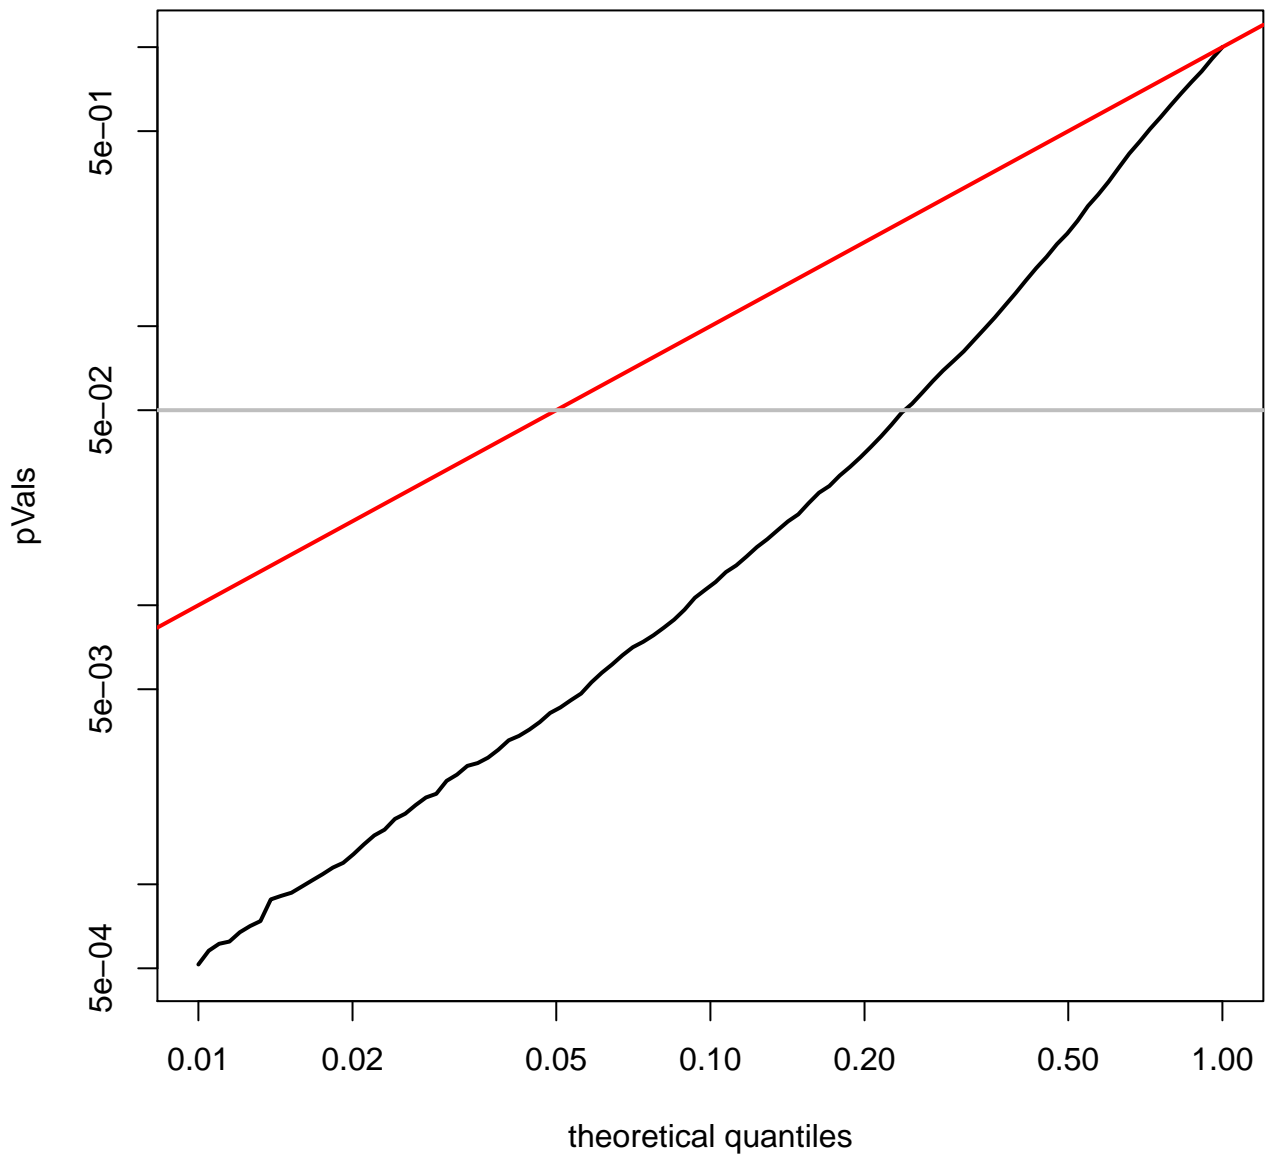

# Cumulative p-value distribution for HNSC

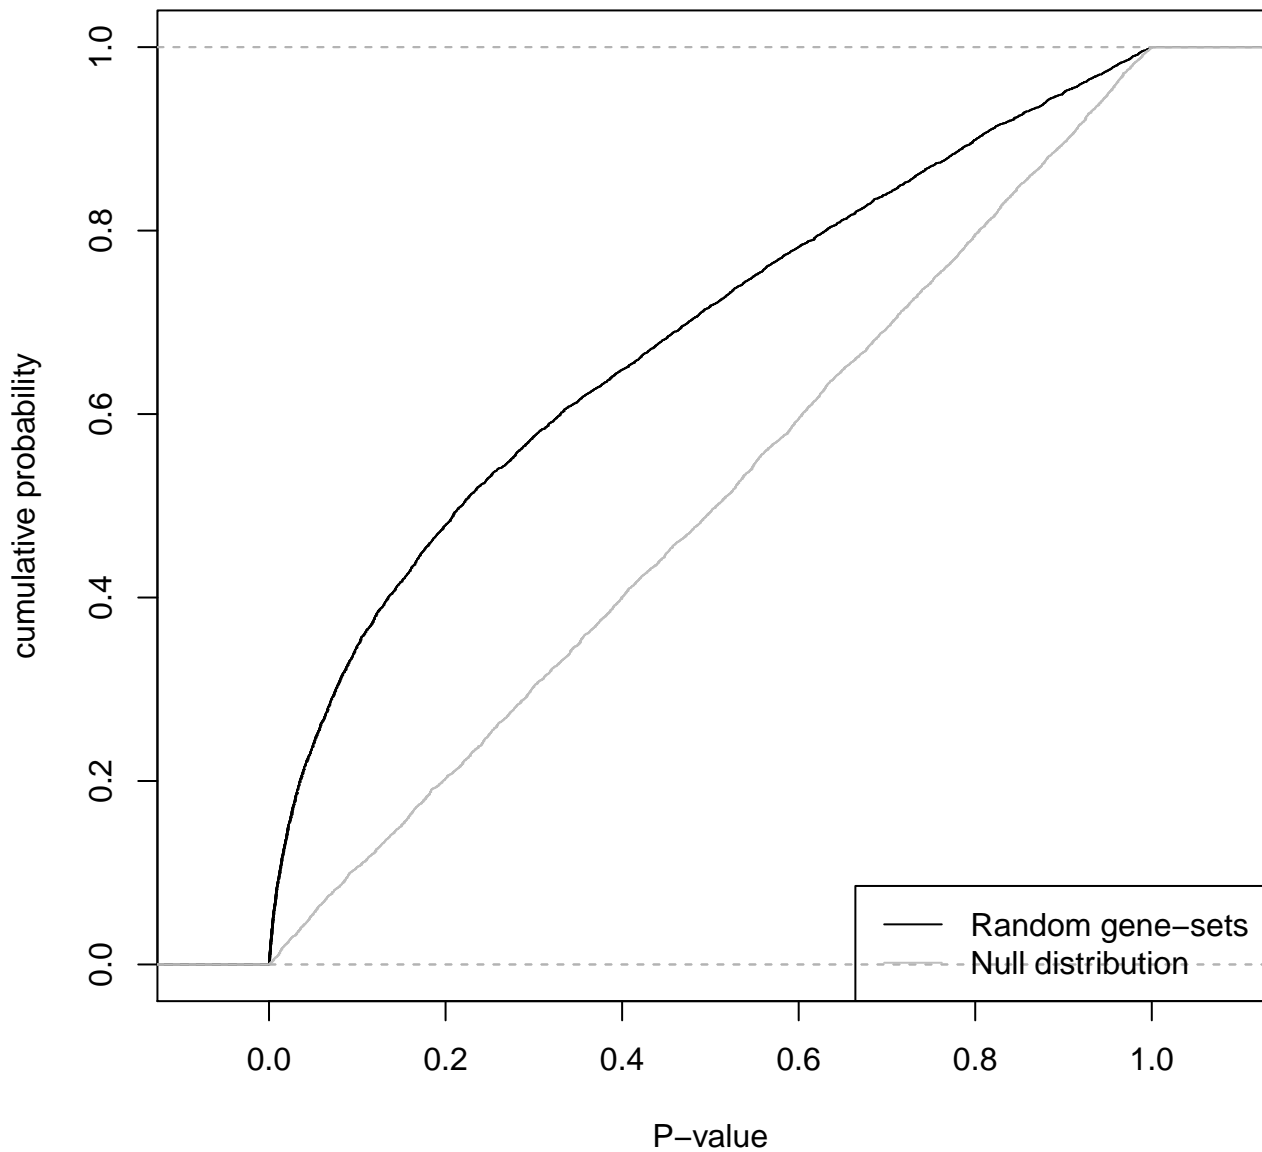



# Histogram for pVals for KICH

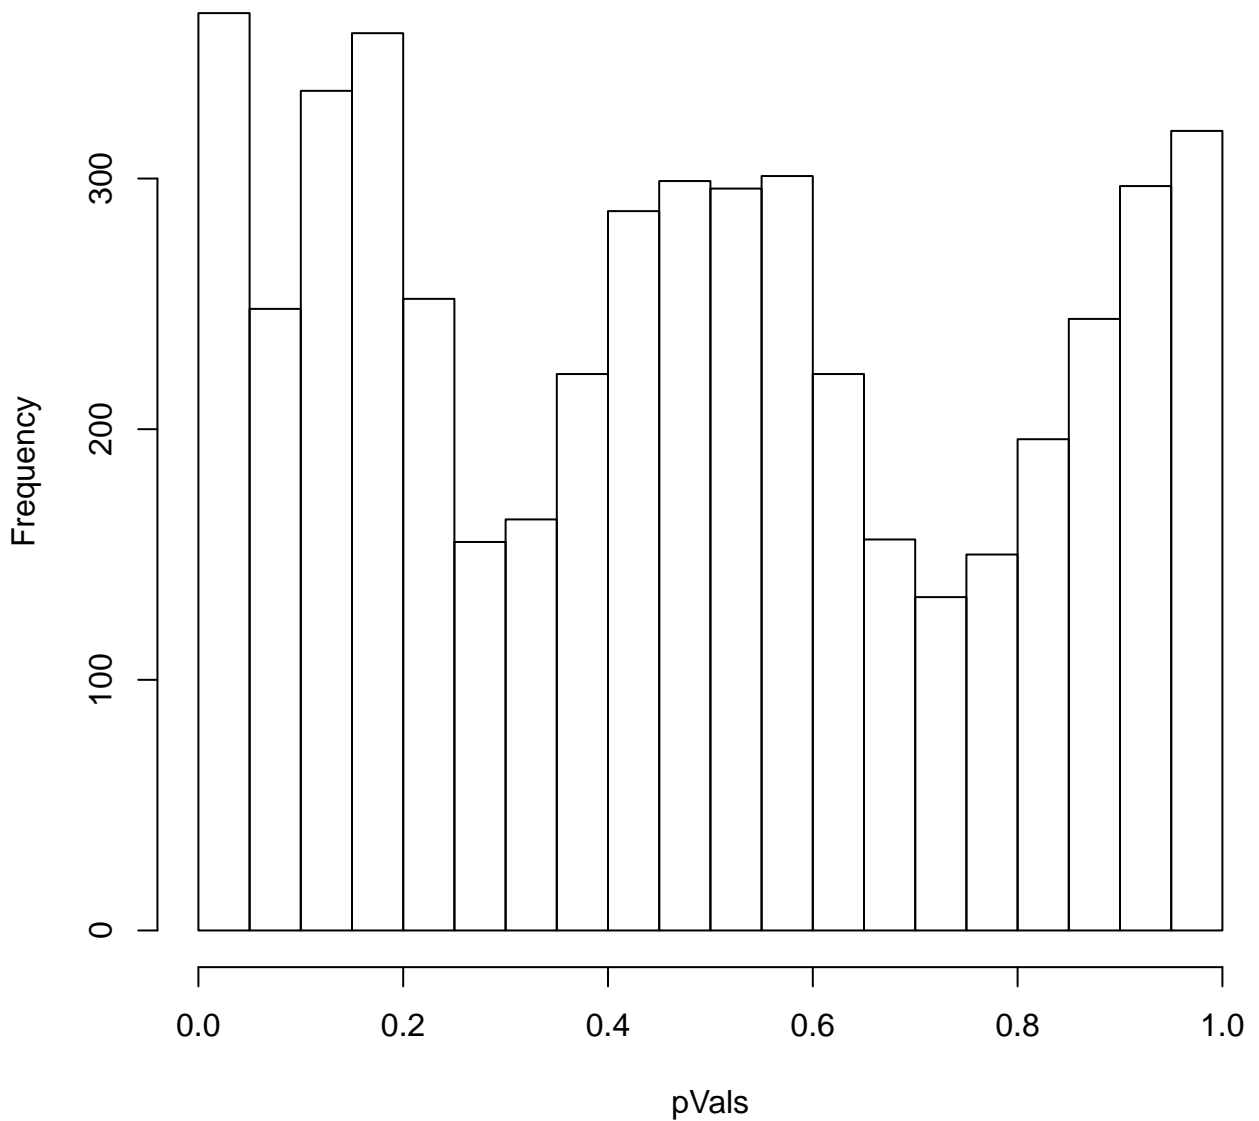

quantile plot for KICH

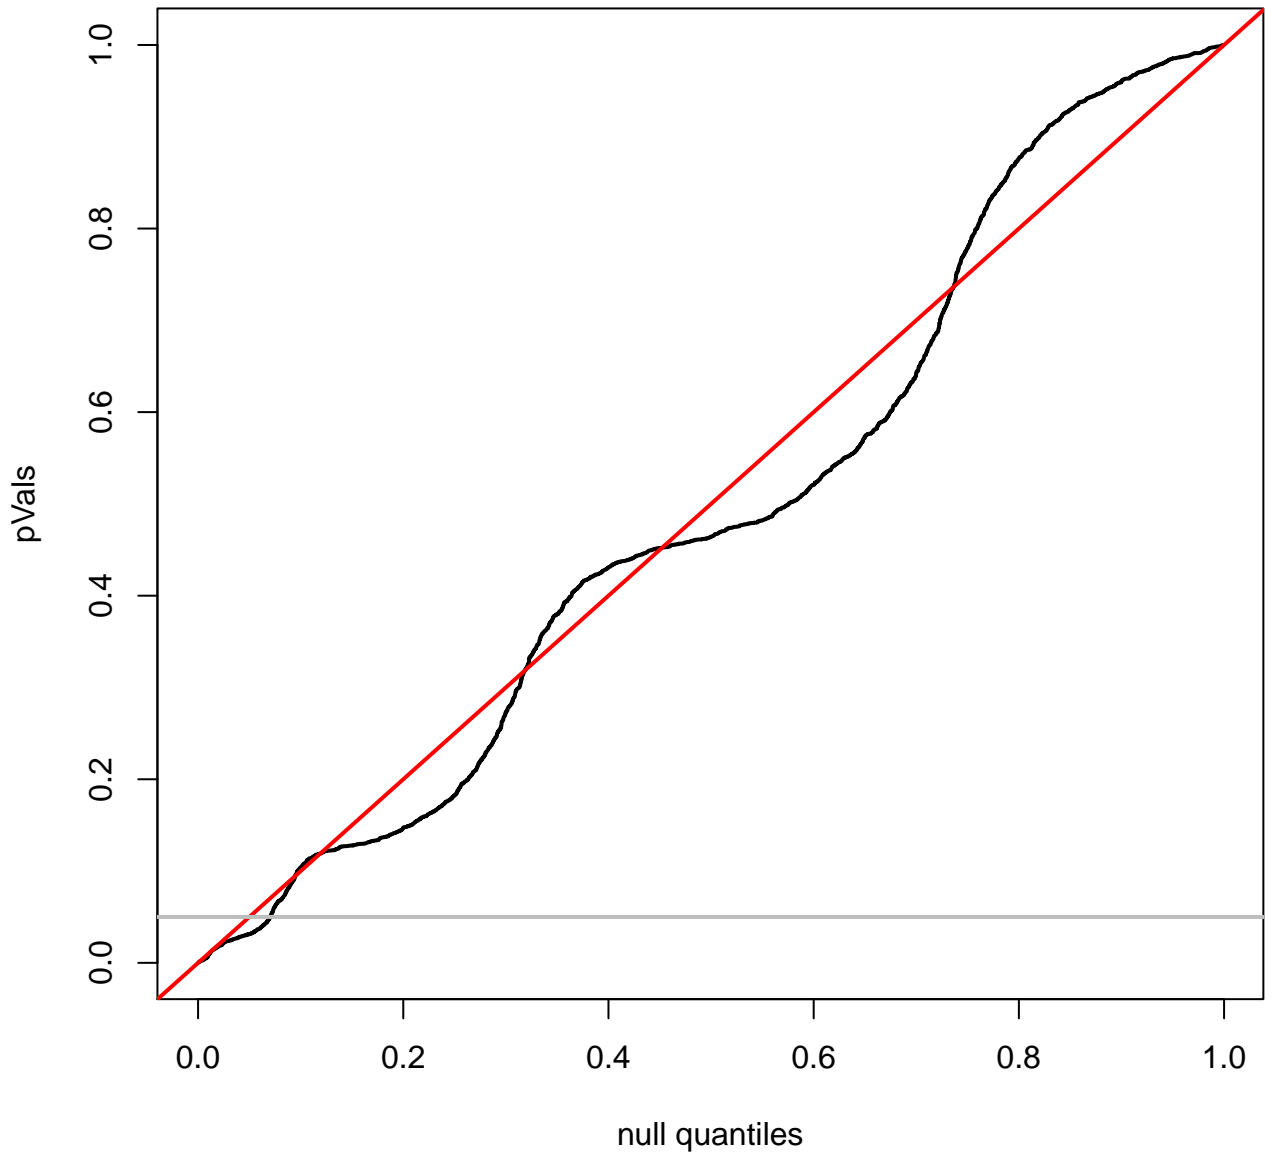

quantile plot for KICH  
(log-scale)

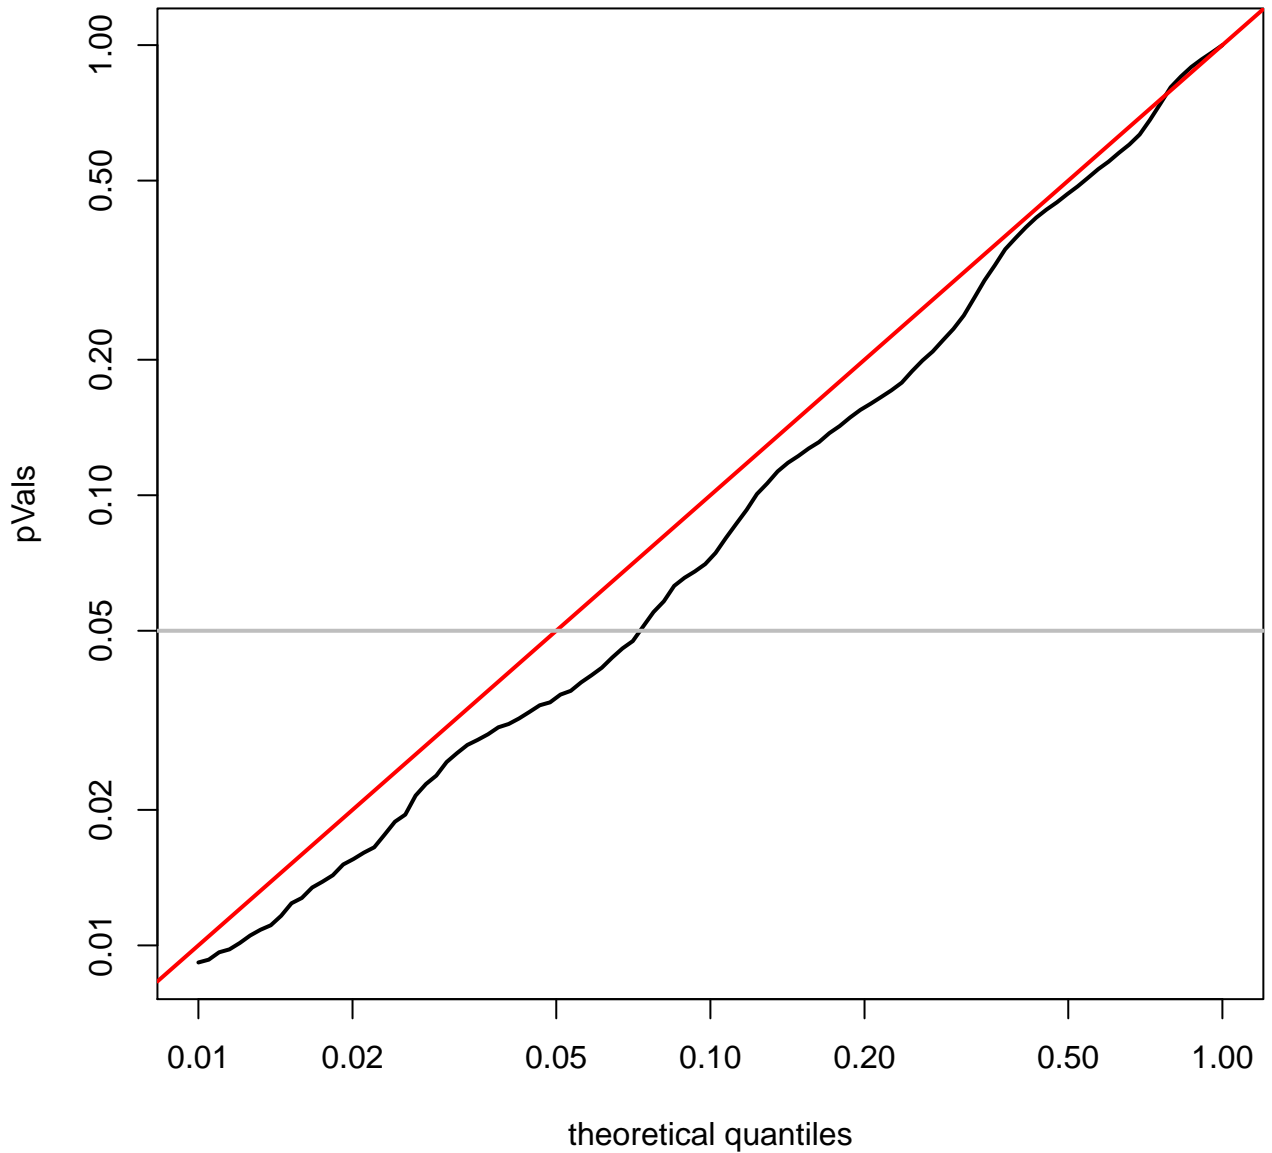

# Cumulative p-value distribution for KICH

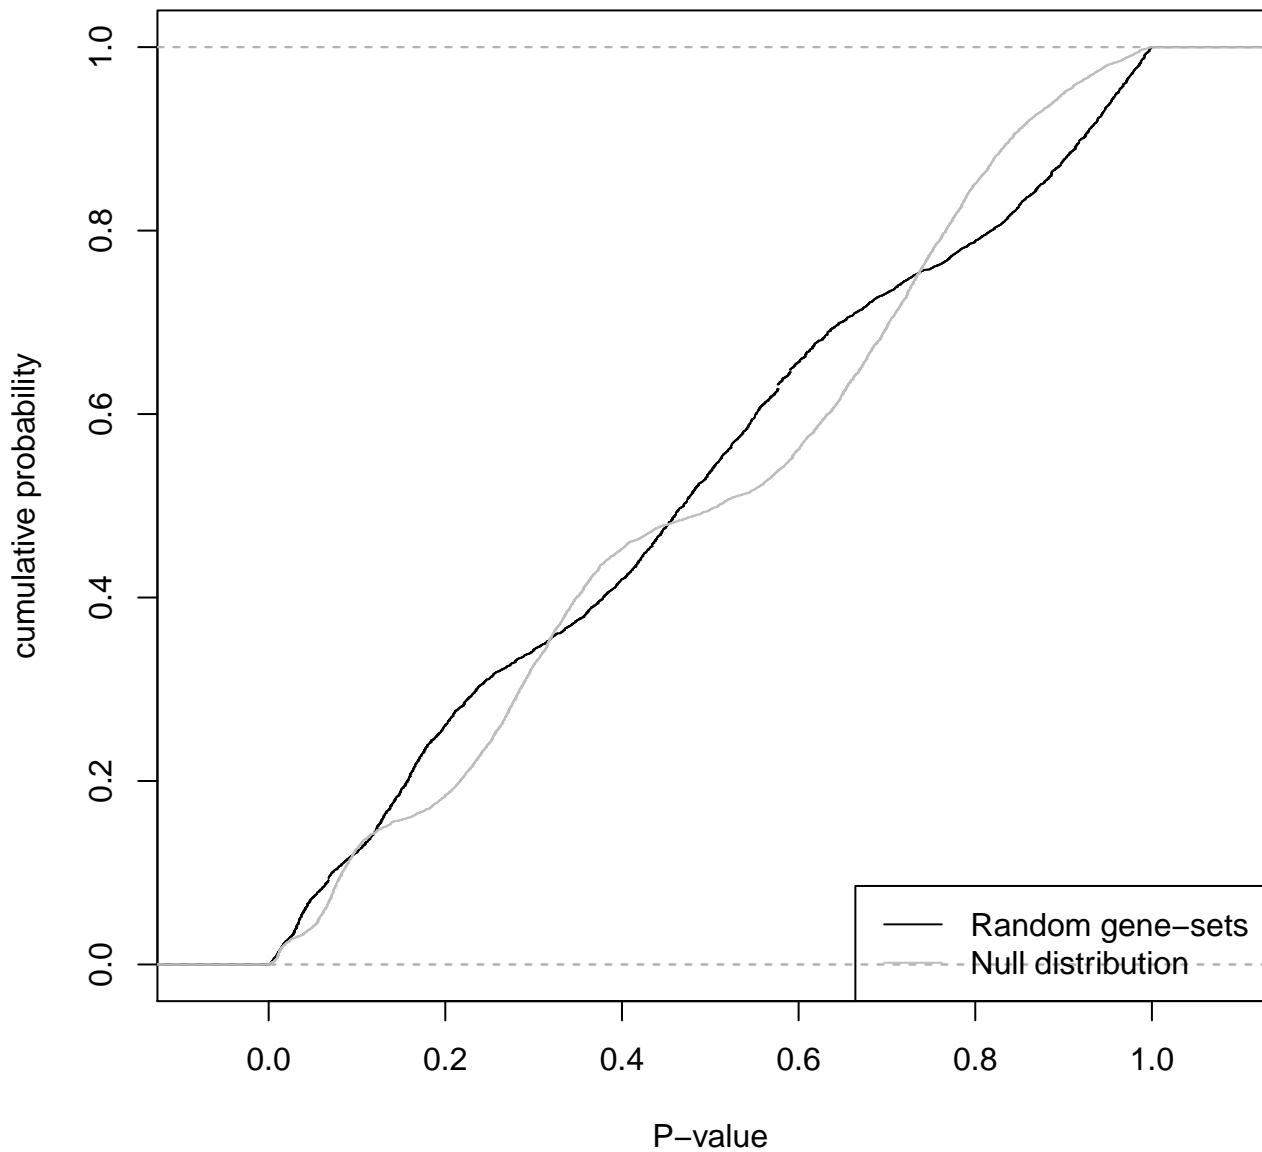

# Histogram for pVals for KIPAN

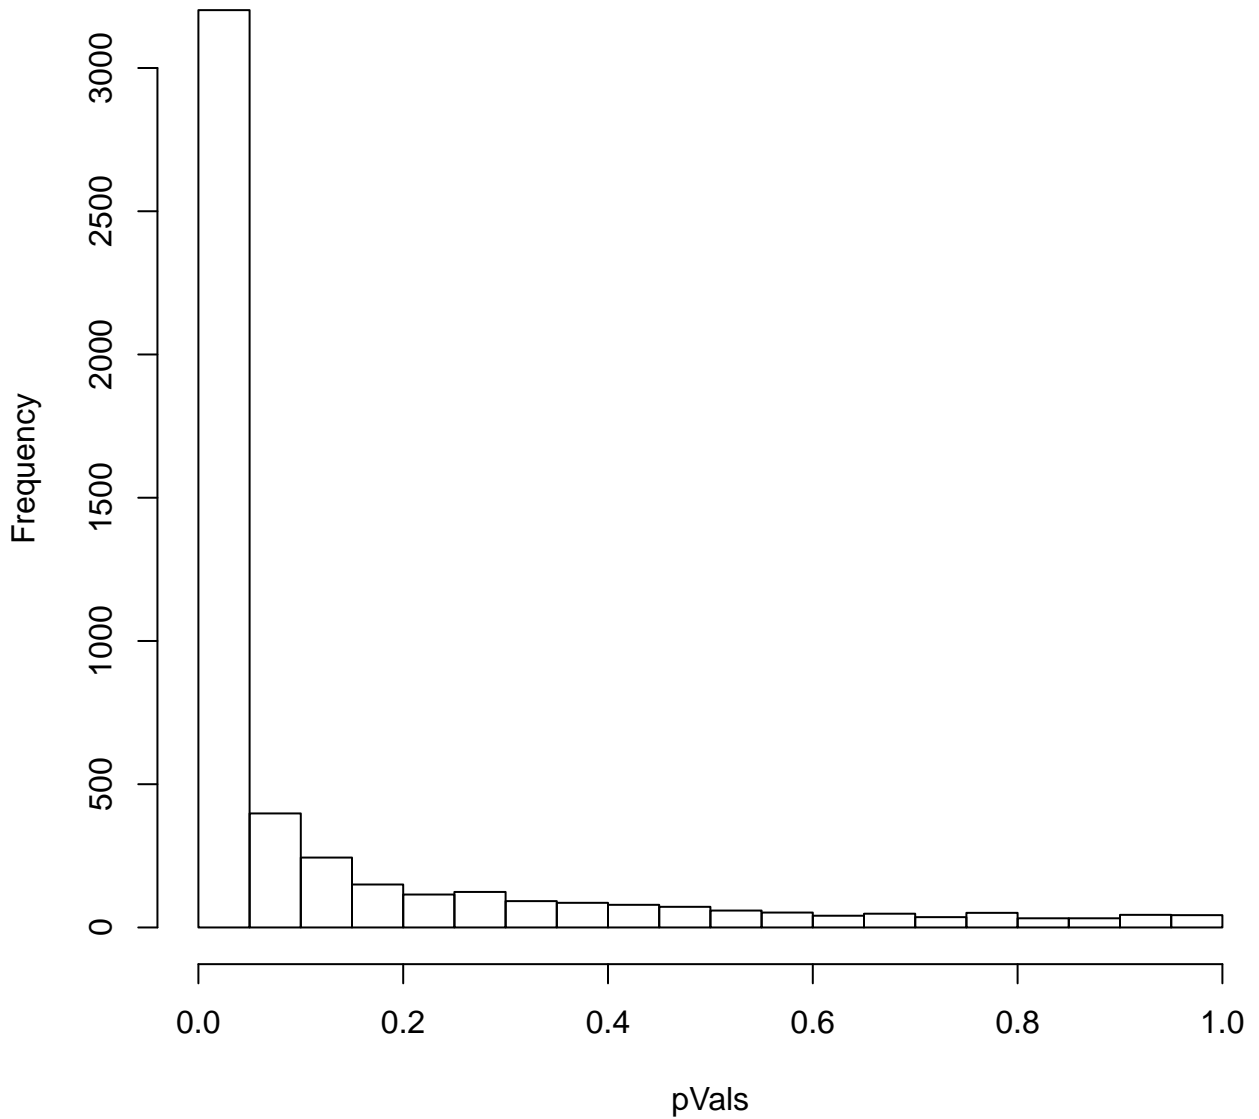

# quantile plot for KIPAN

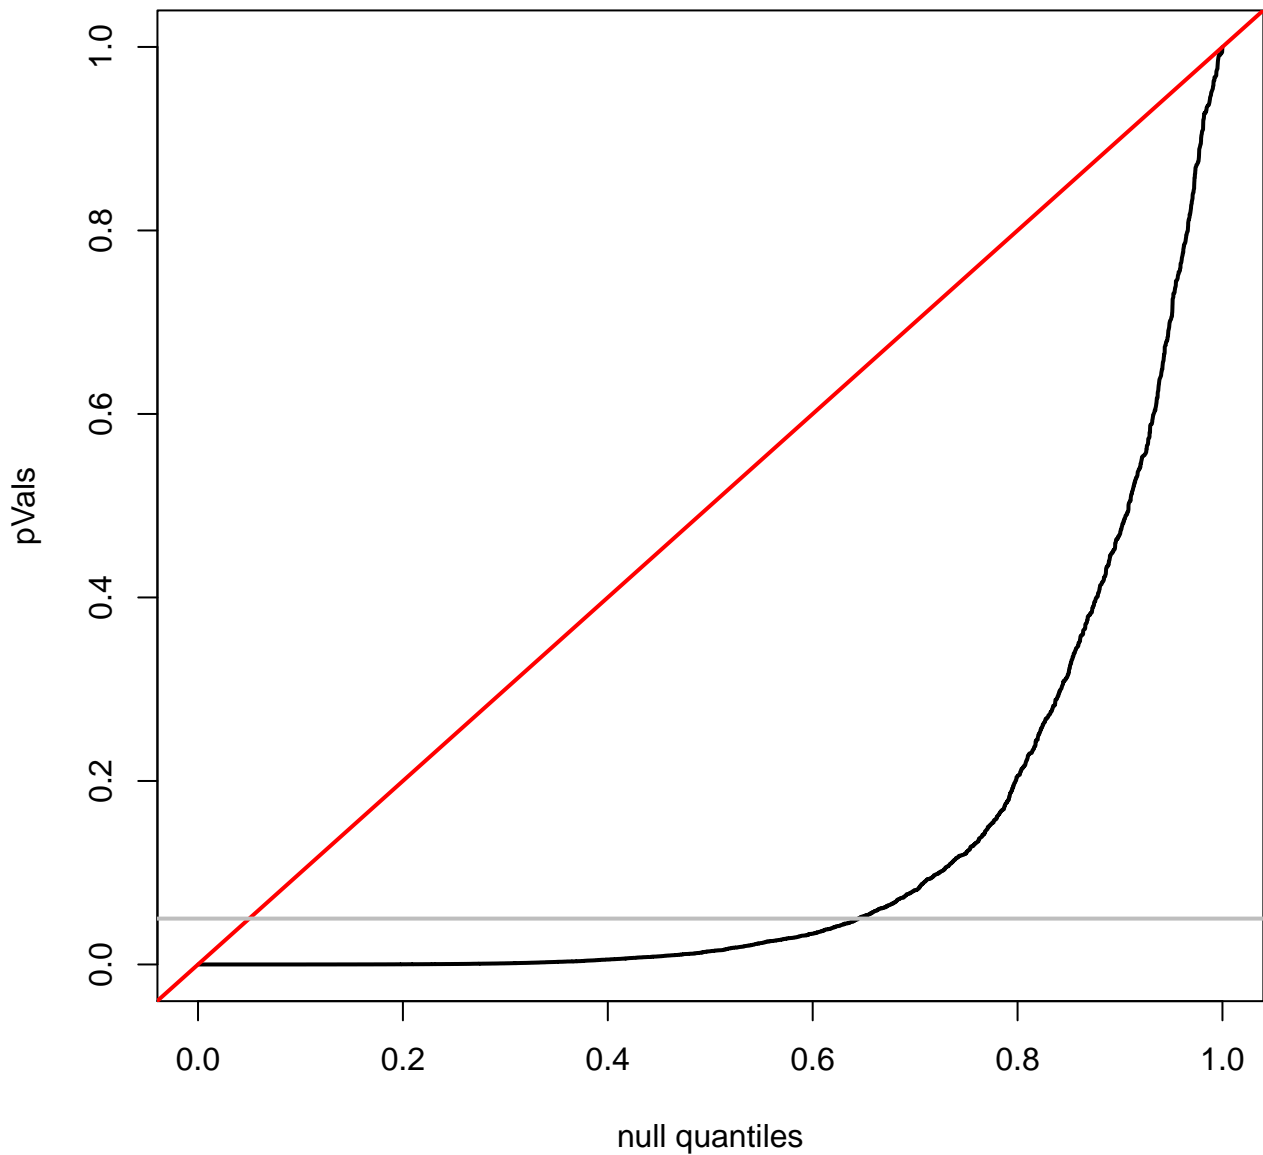

quantile plot for KIPAN  
(log-scale)

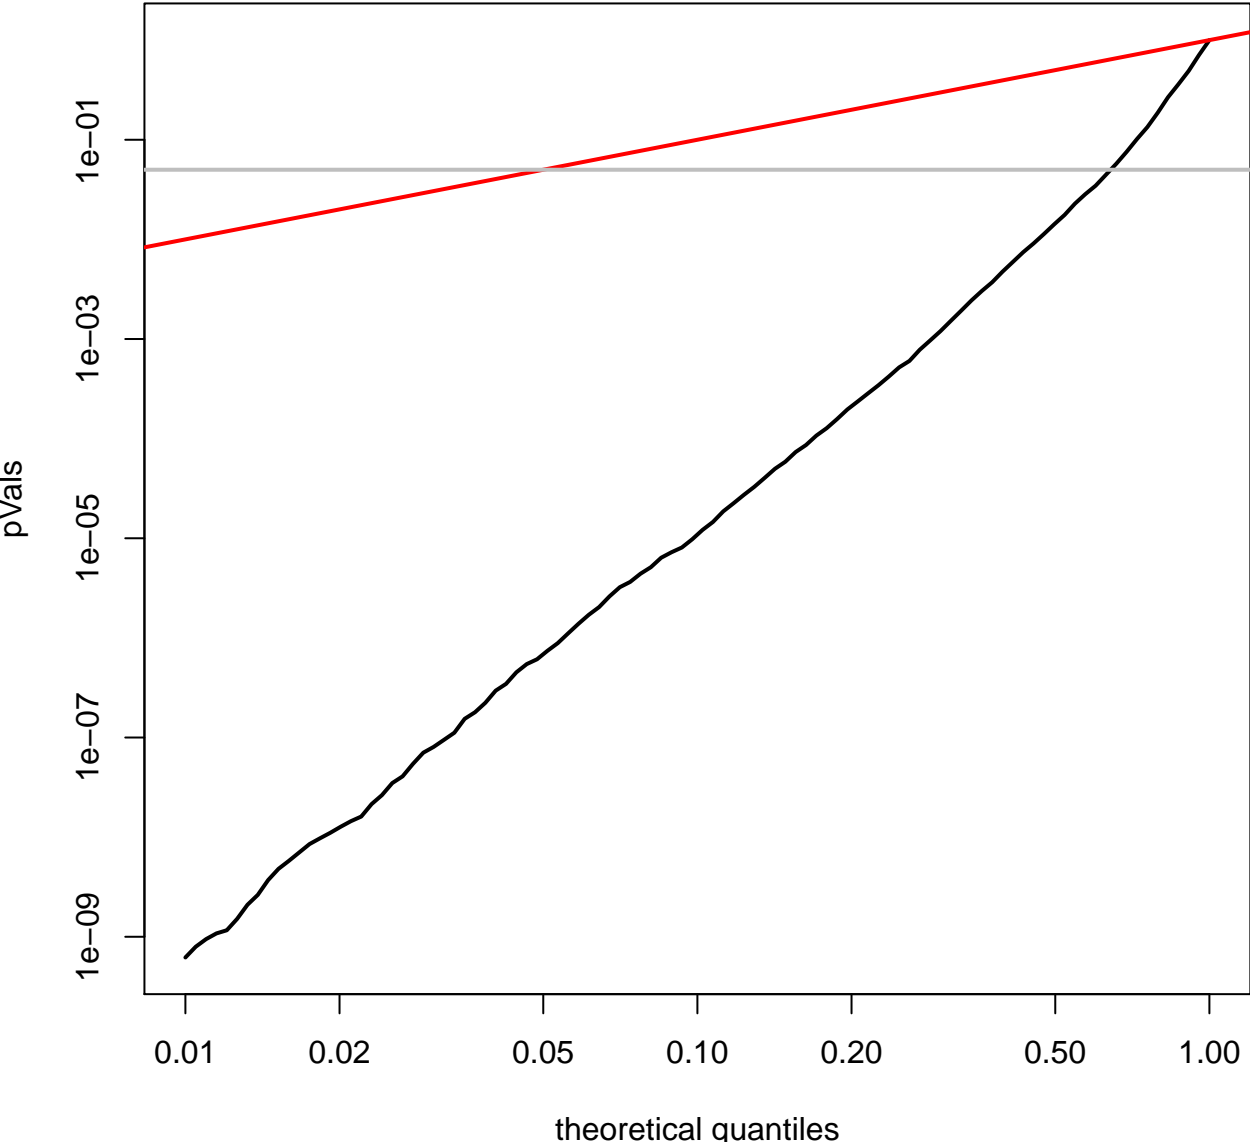

# Cumulative p-value distribution for KIPAN

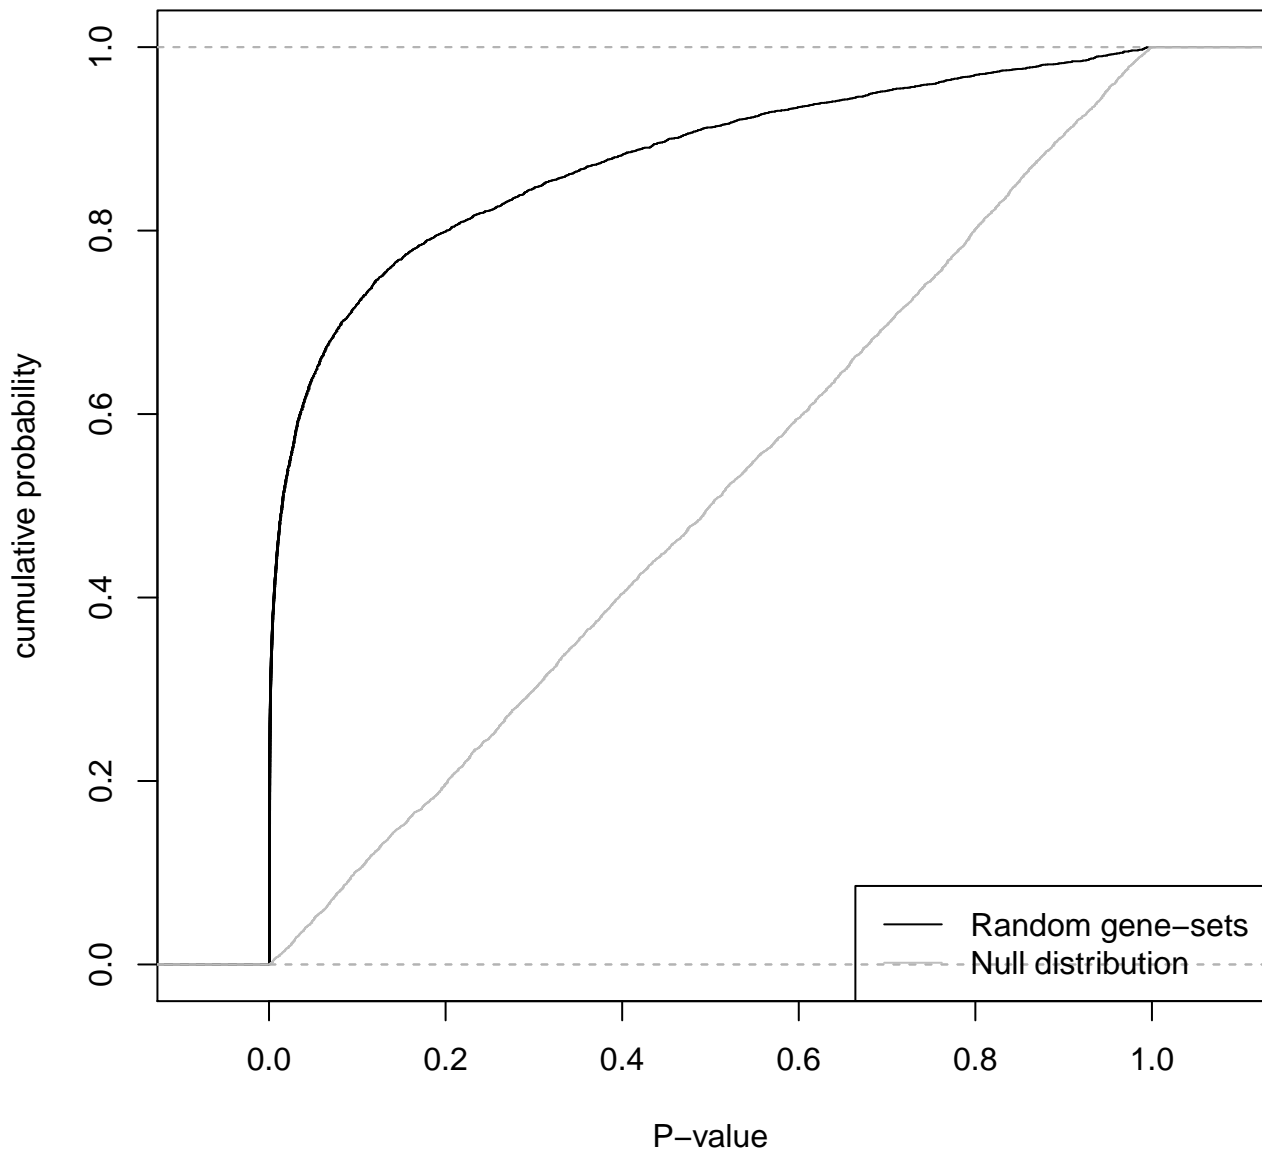



# Histogram for pVals for KIRC

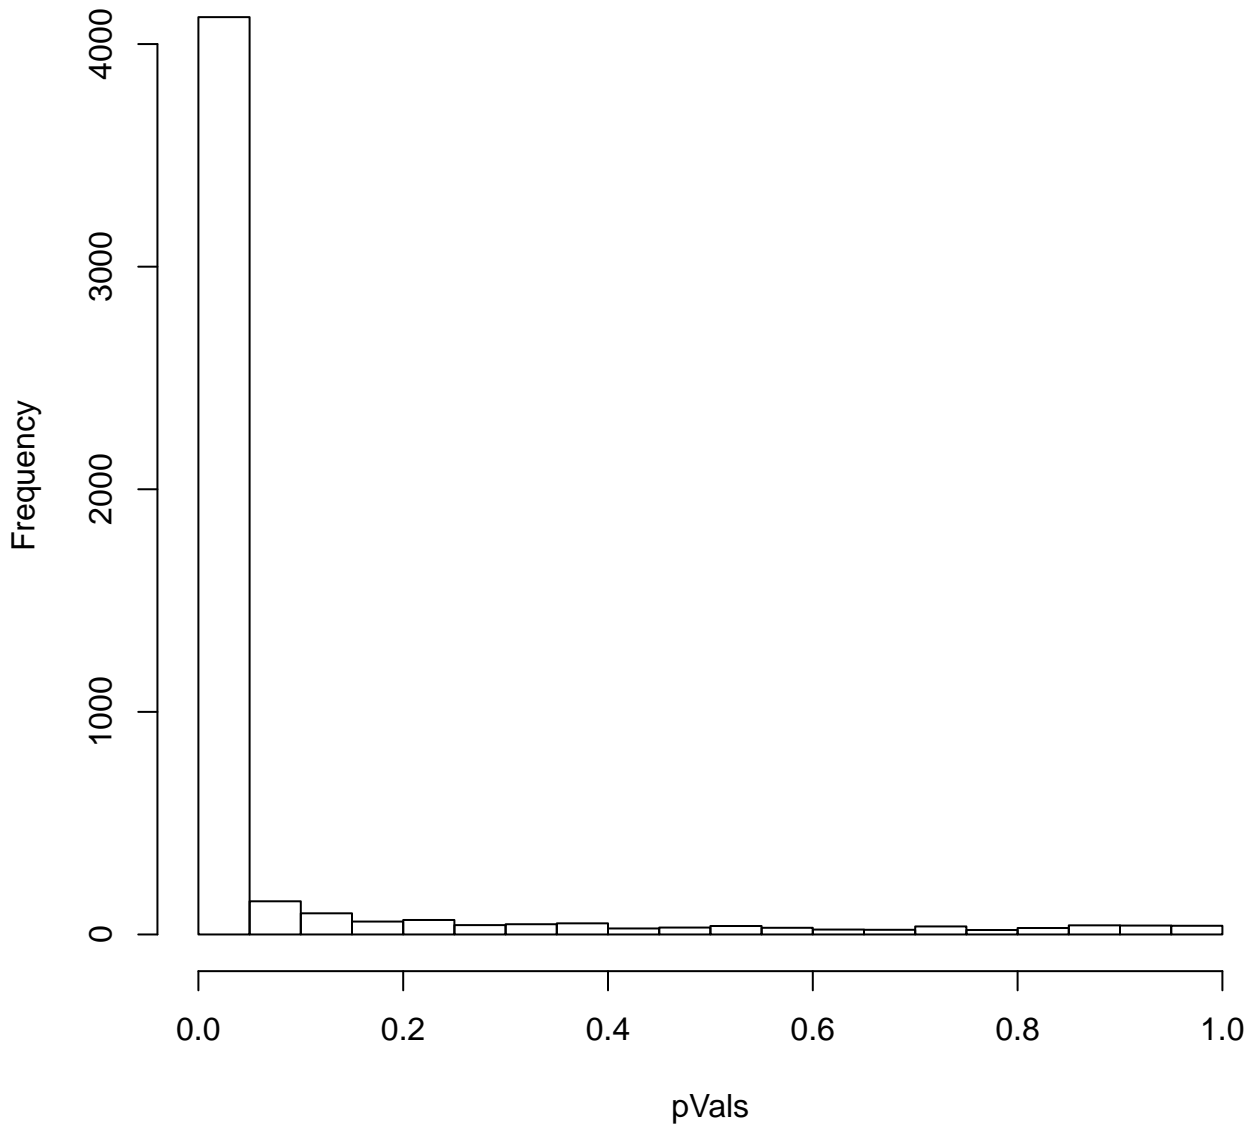

quantile plot for KIRC

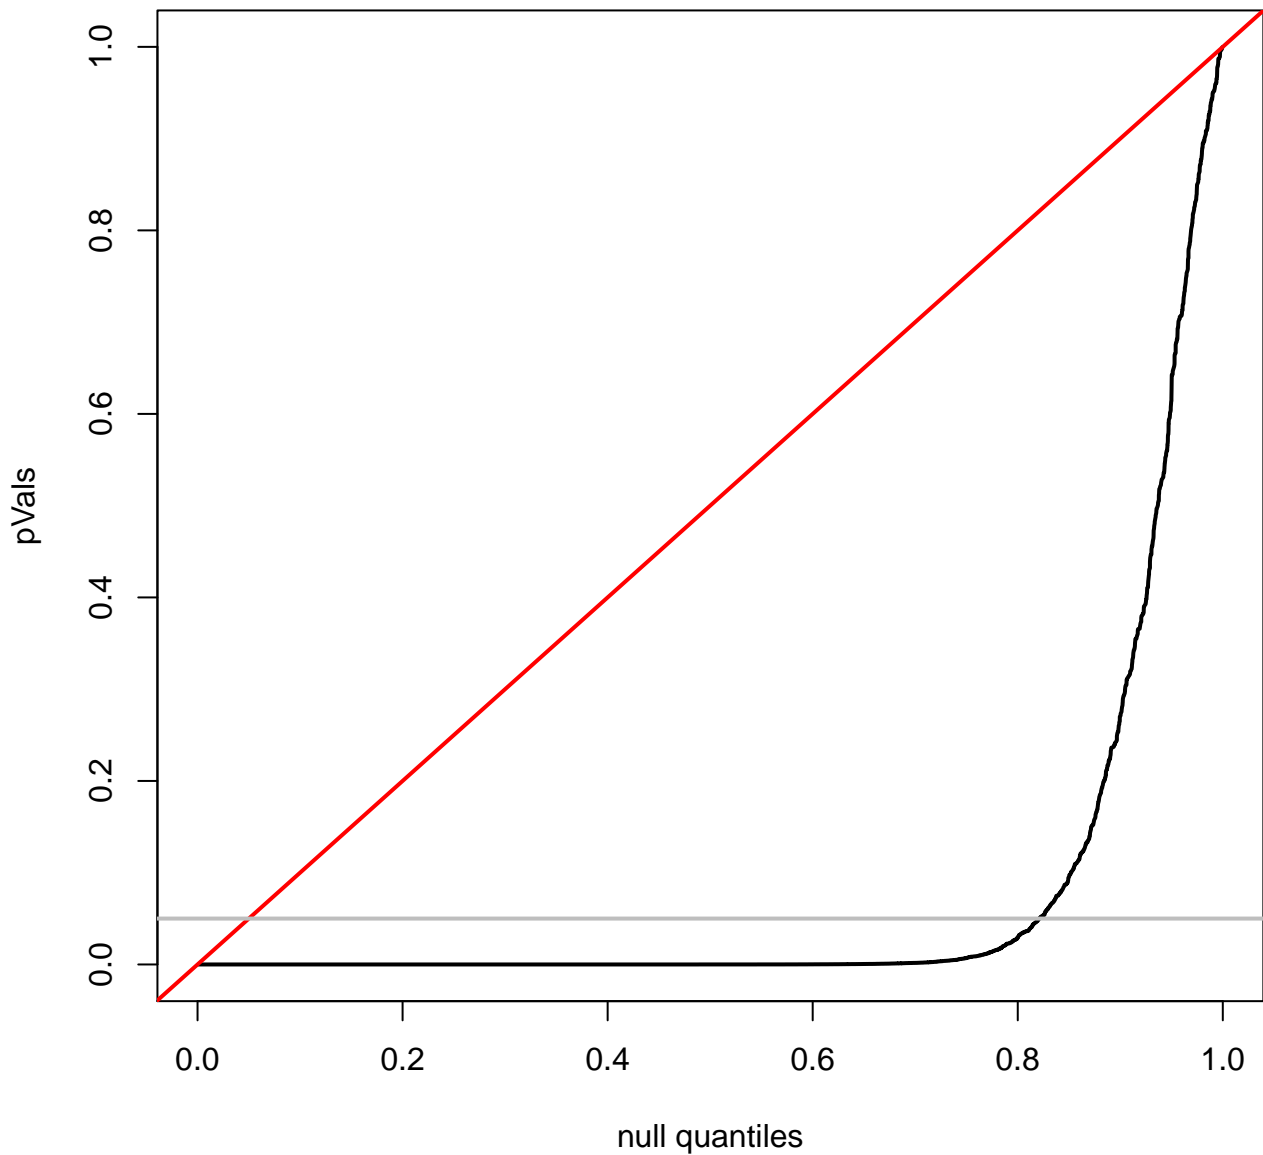

quantile plot for KIRC  
(log-scale)

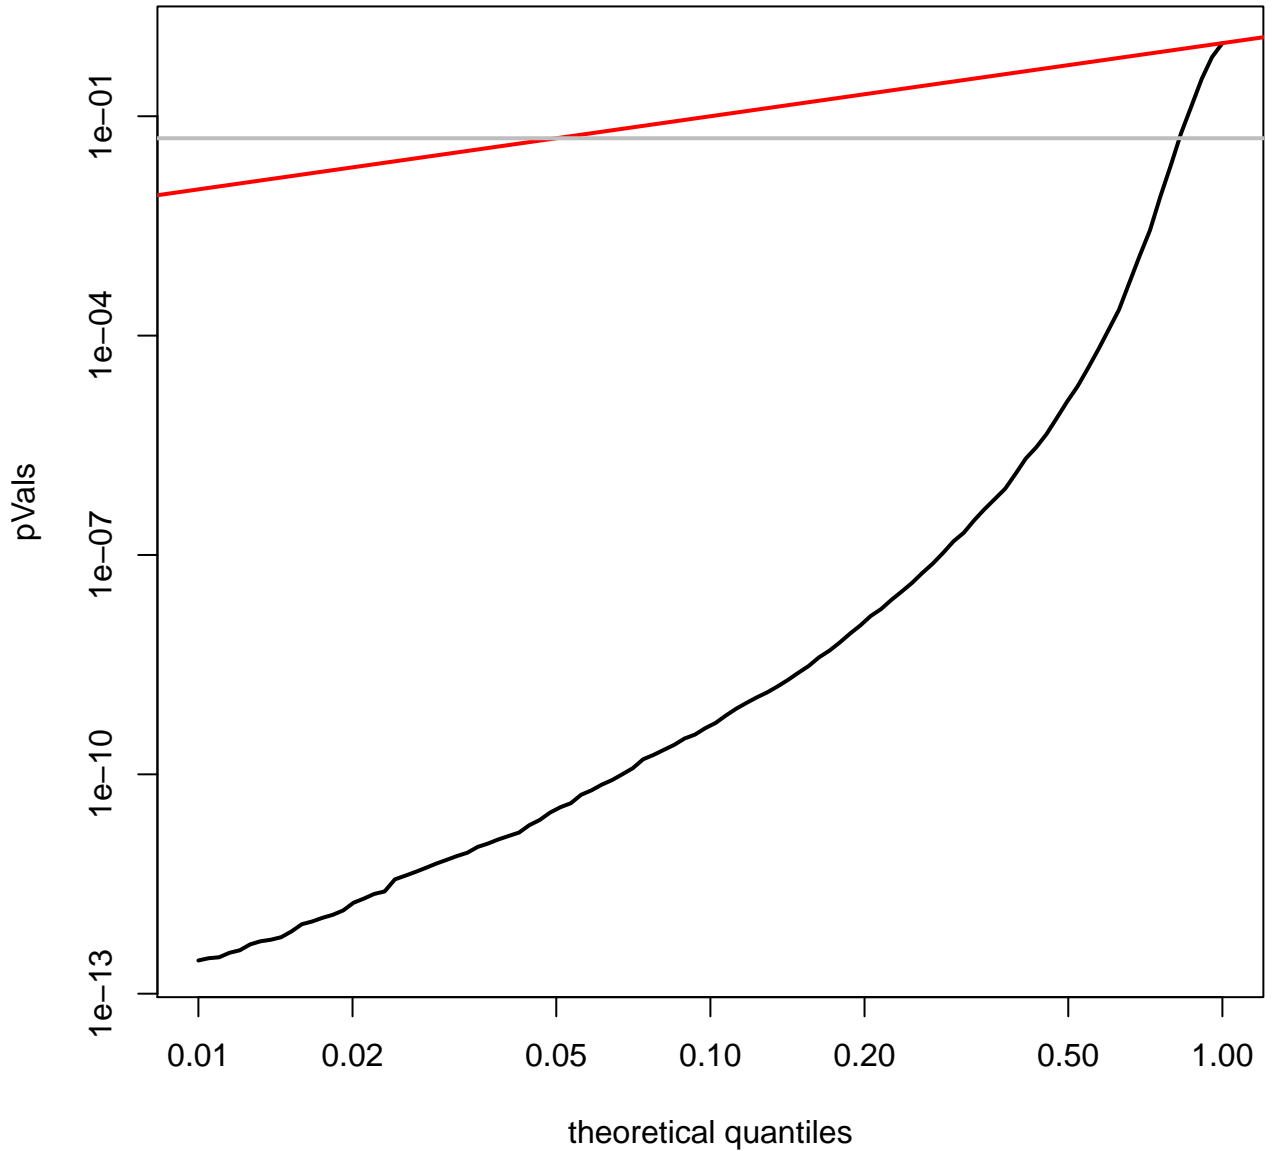

# Cumulative p-value distribution for KIRC

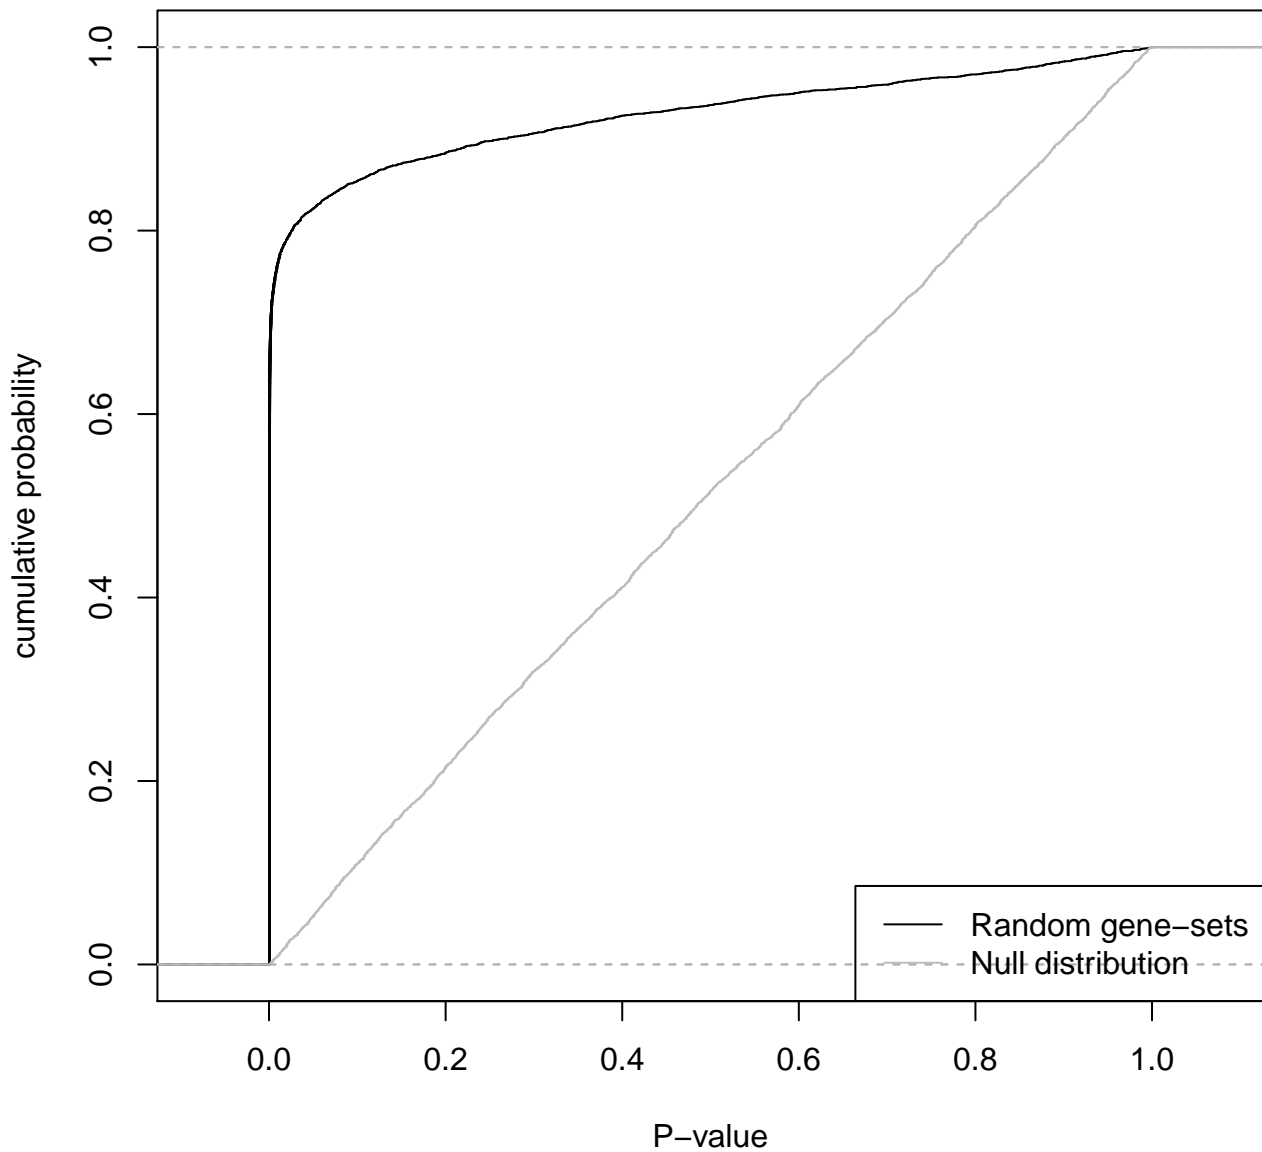

# Histogram for pVals for KIRP

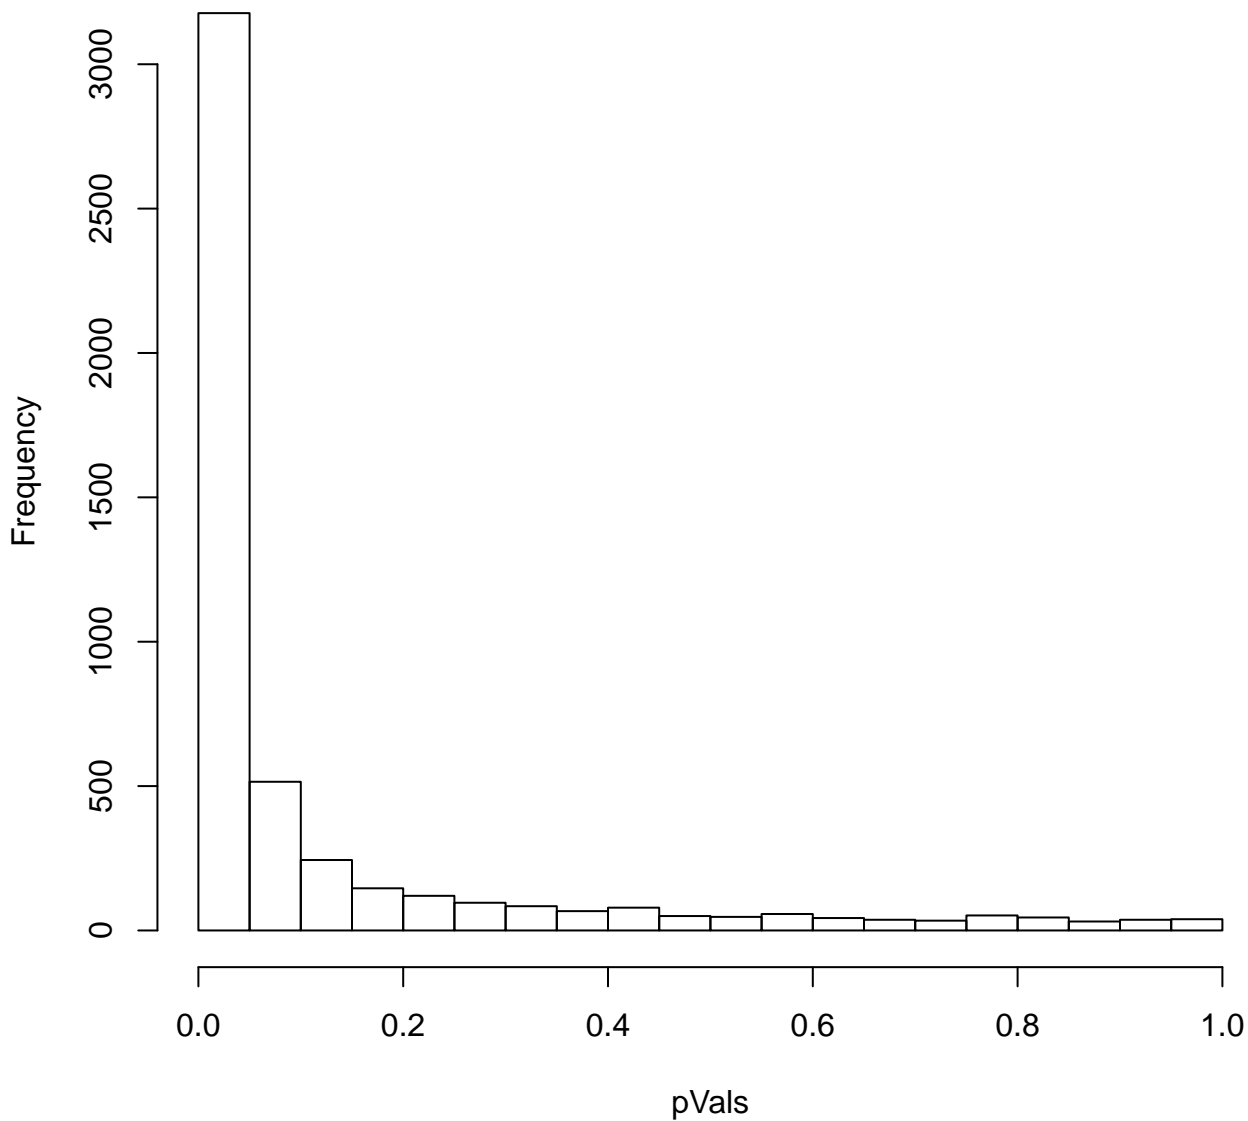

quantile plot for KIRP

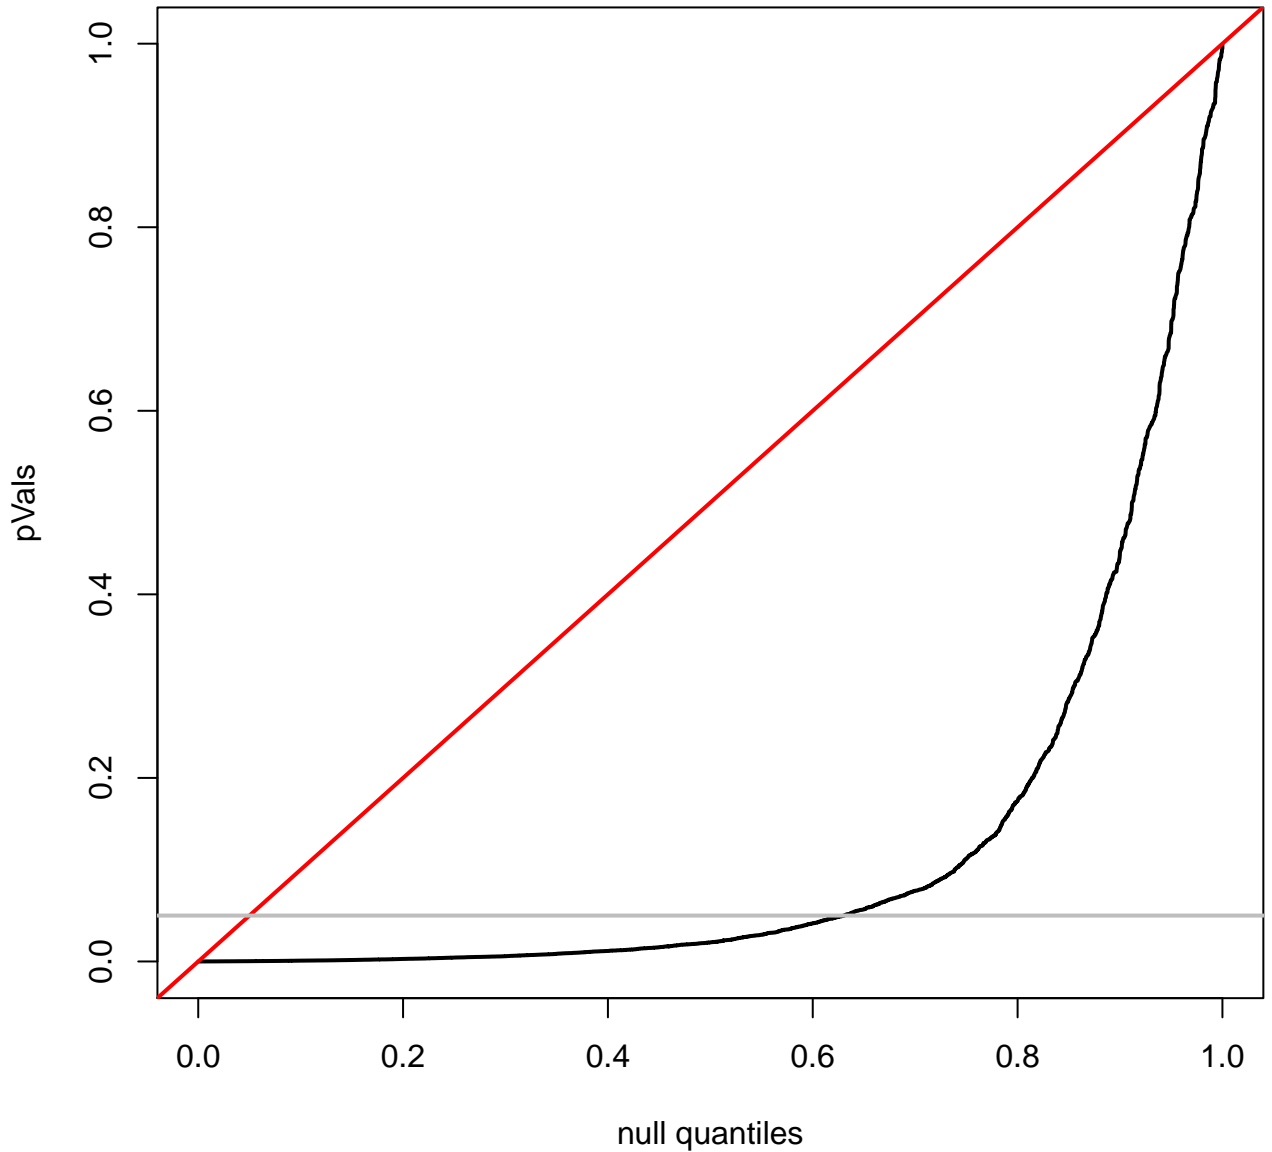

# quantile plot for KIRP (log-scale)

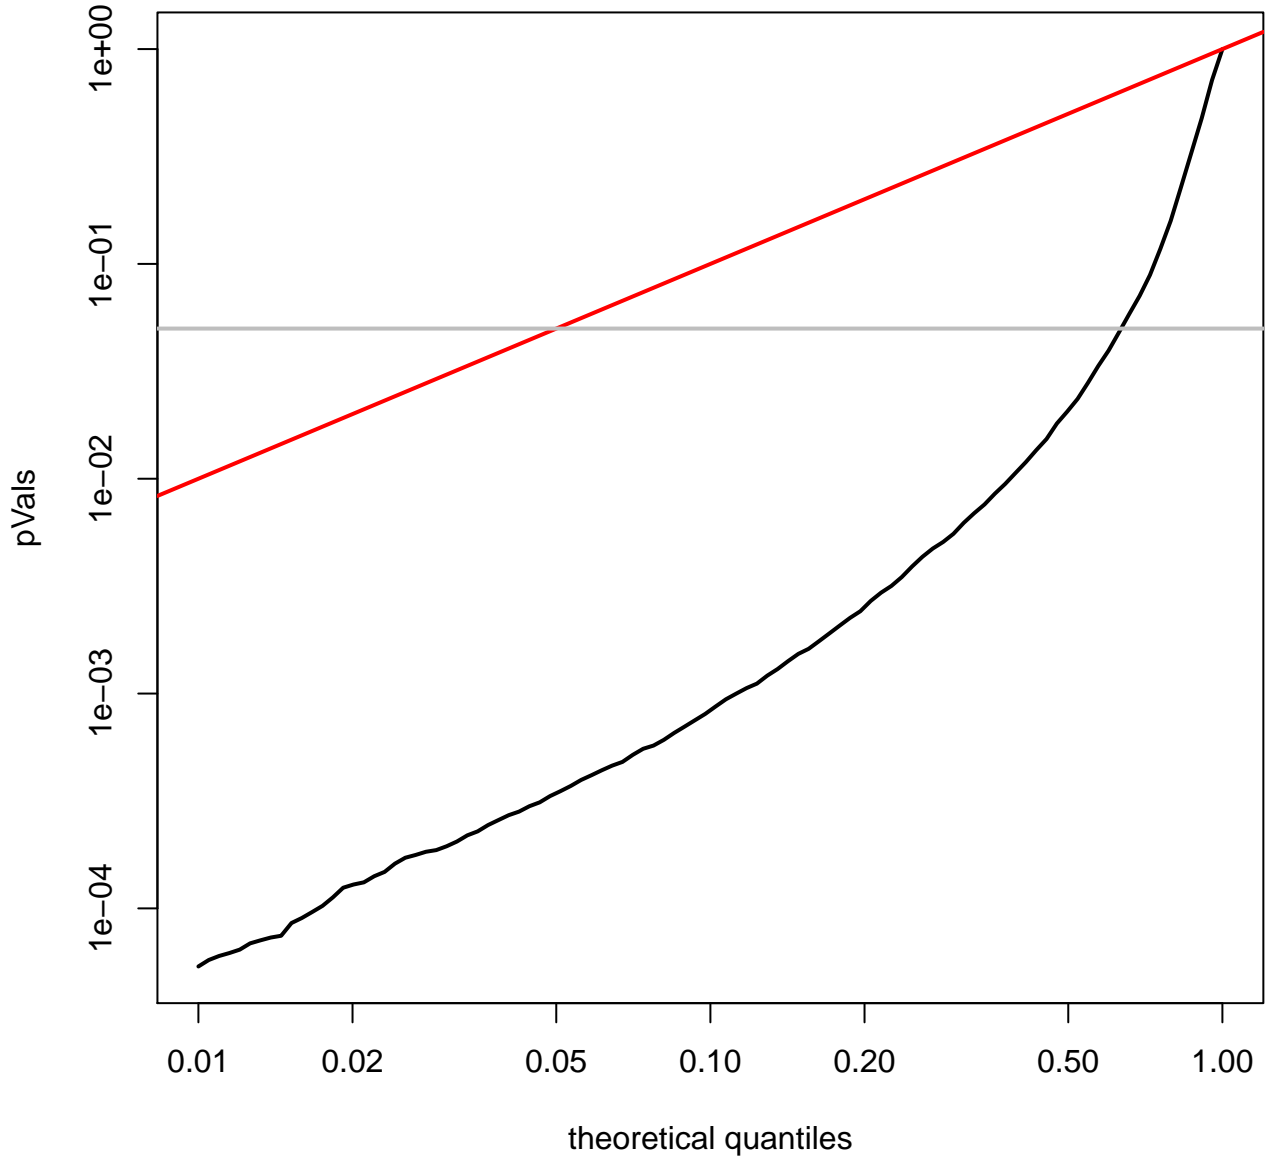

# Cumulative p-value distribution for KIRP

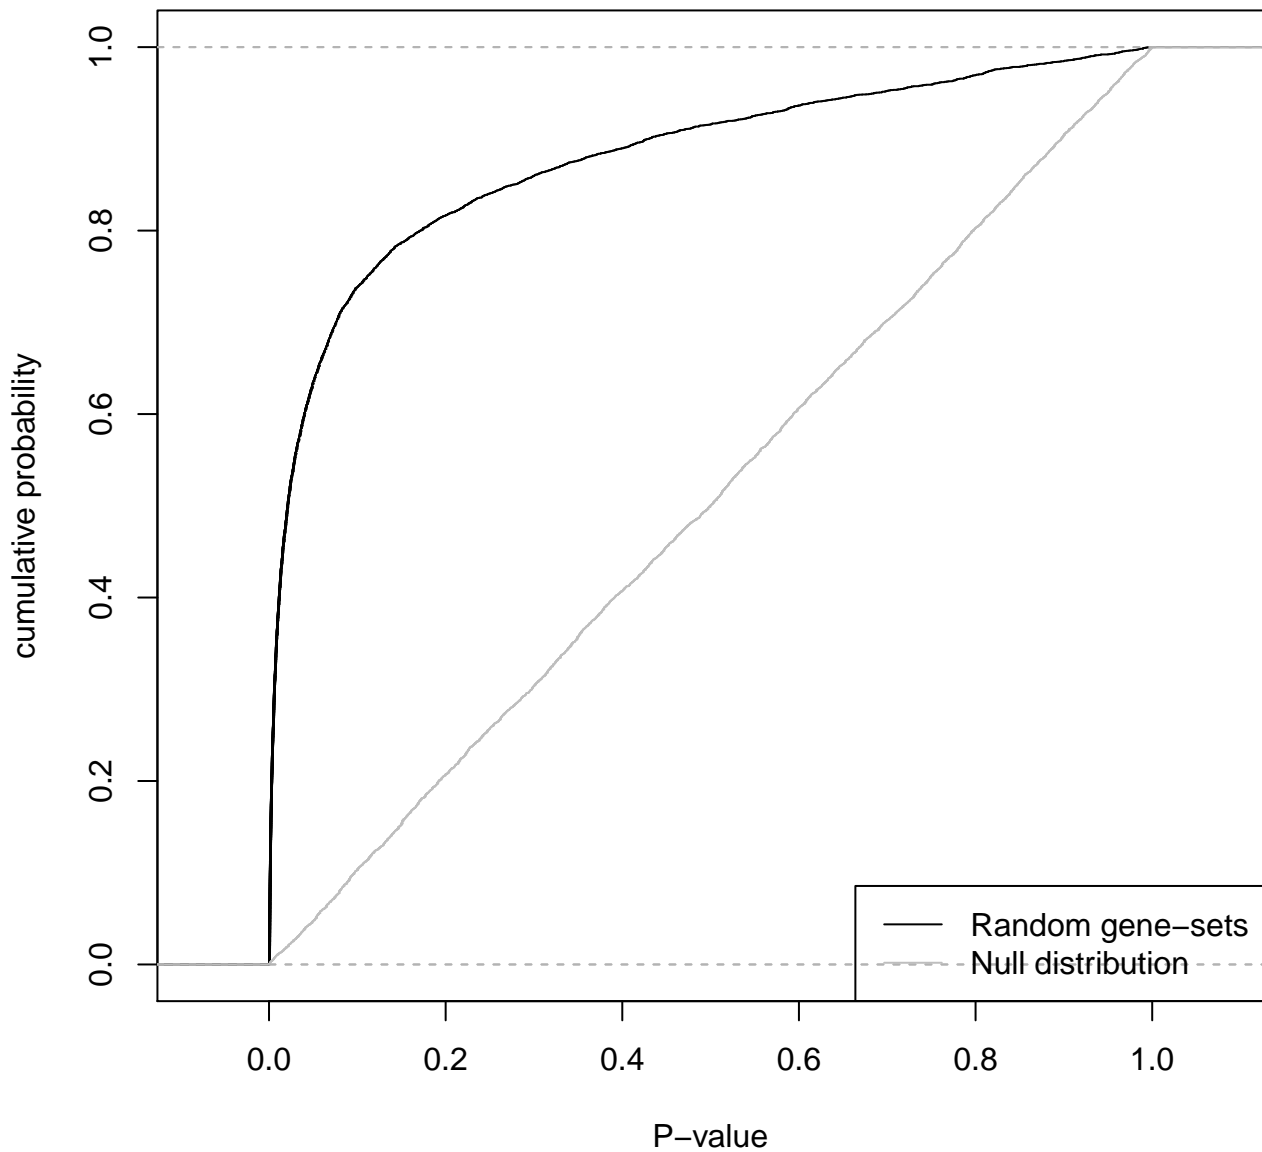



# Histogram for pVals for LAML

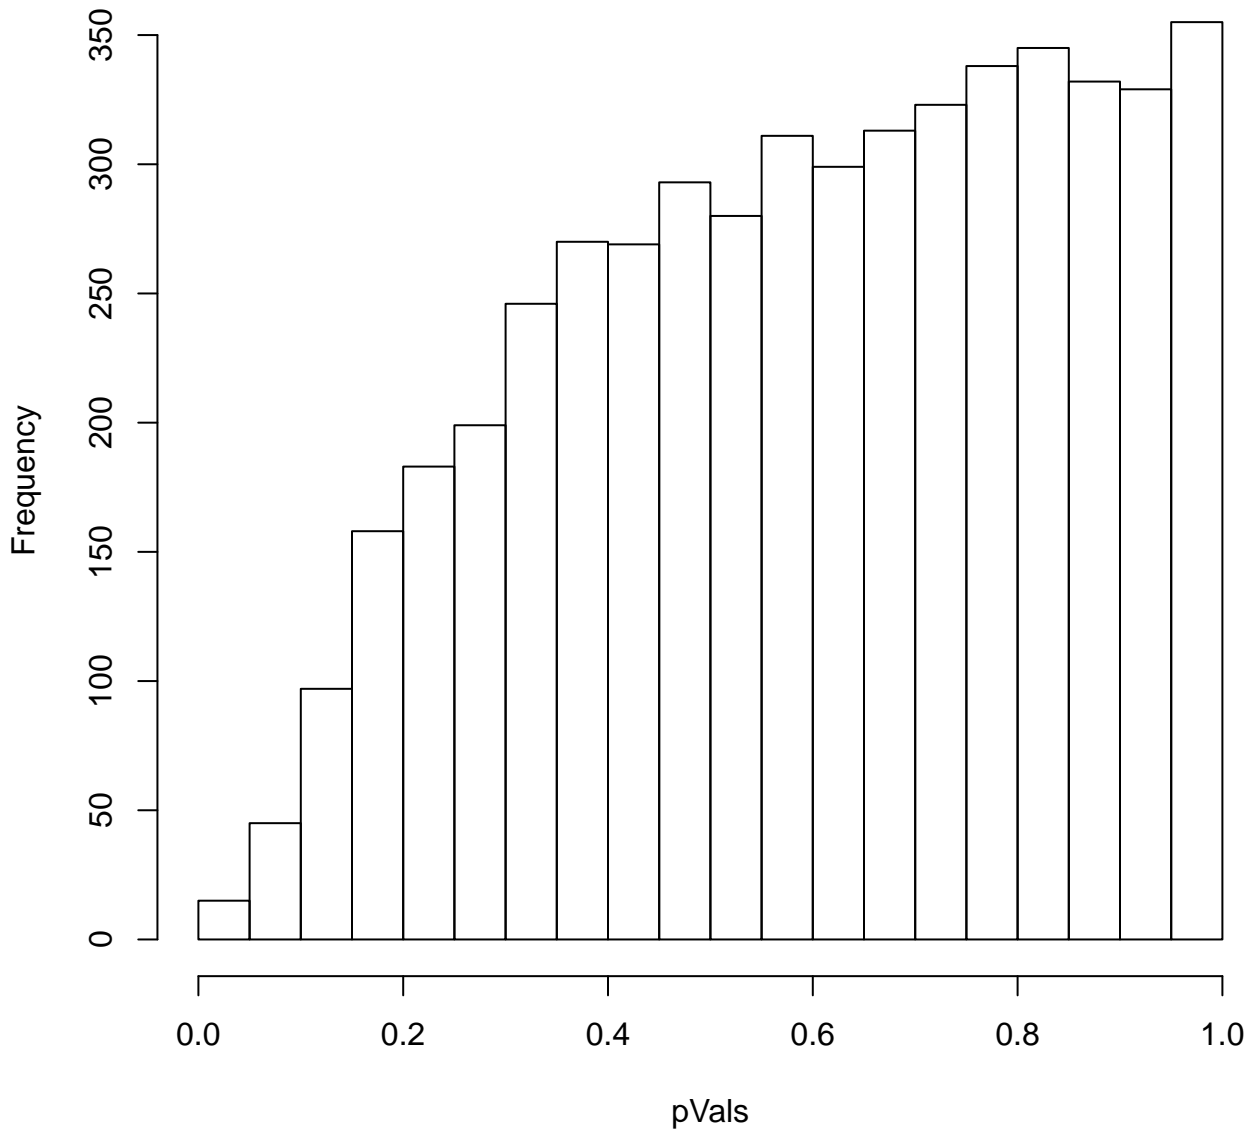

quantile plot for LAML

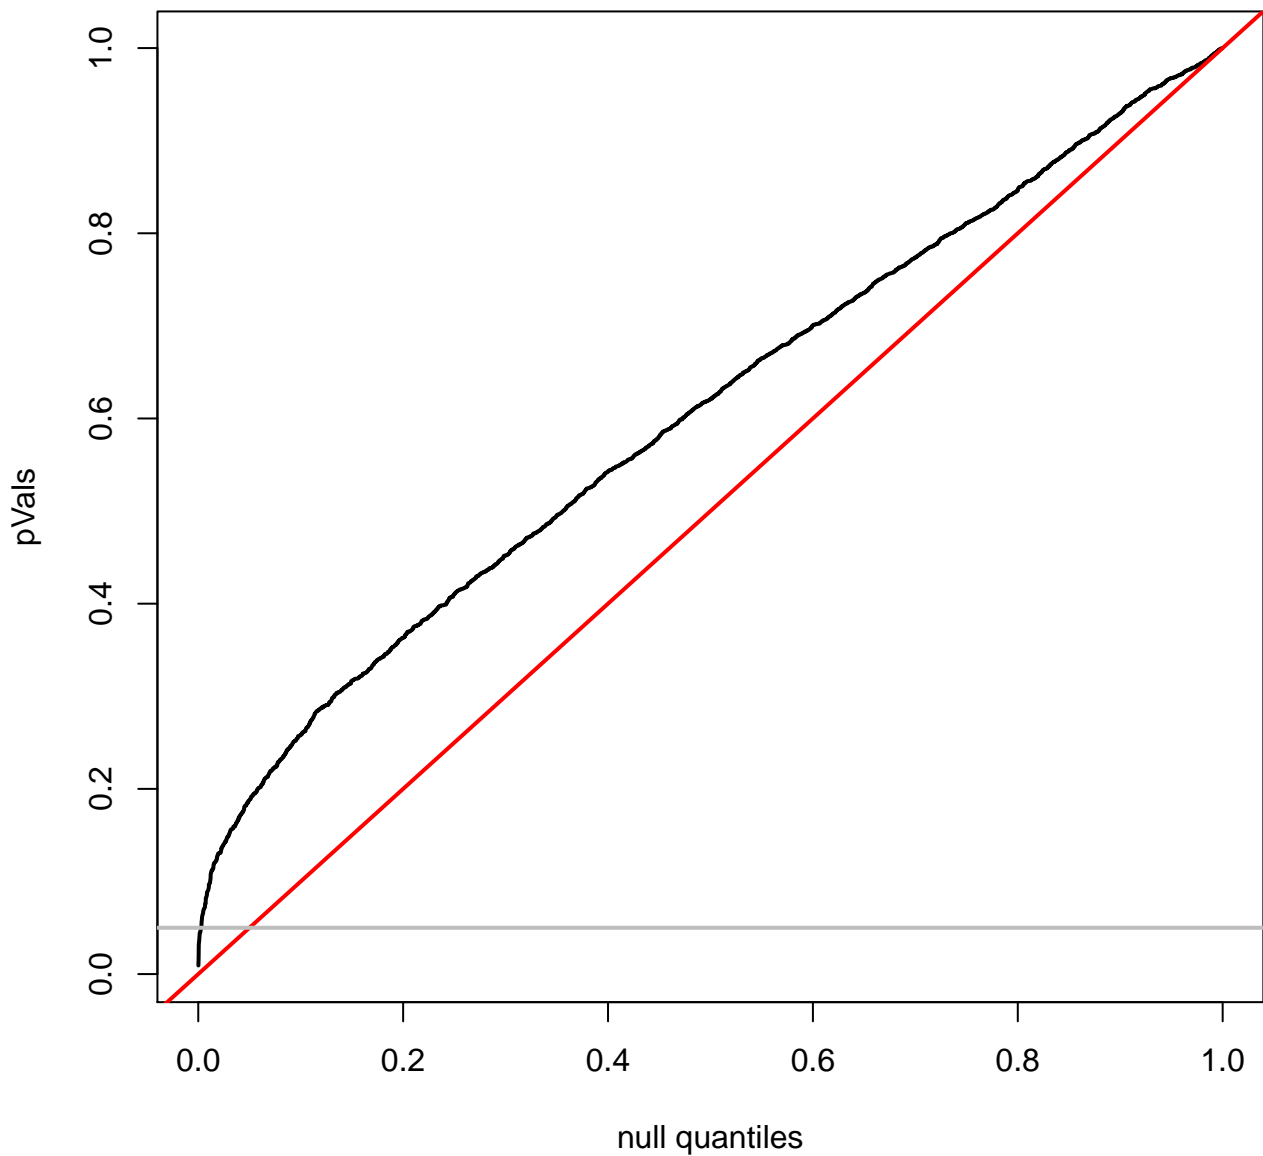

quantile plot for LAML  
(log-scale)

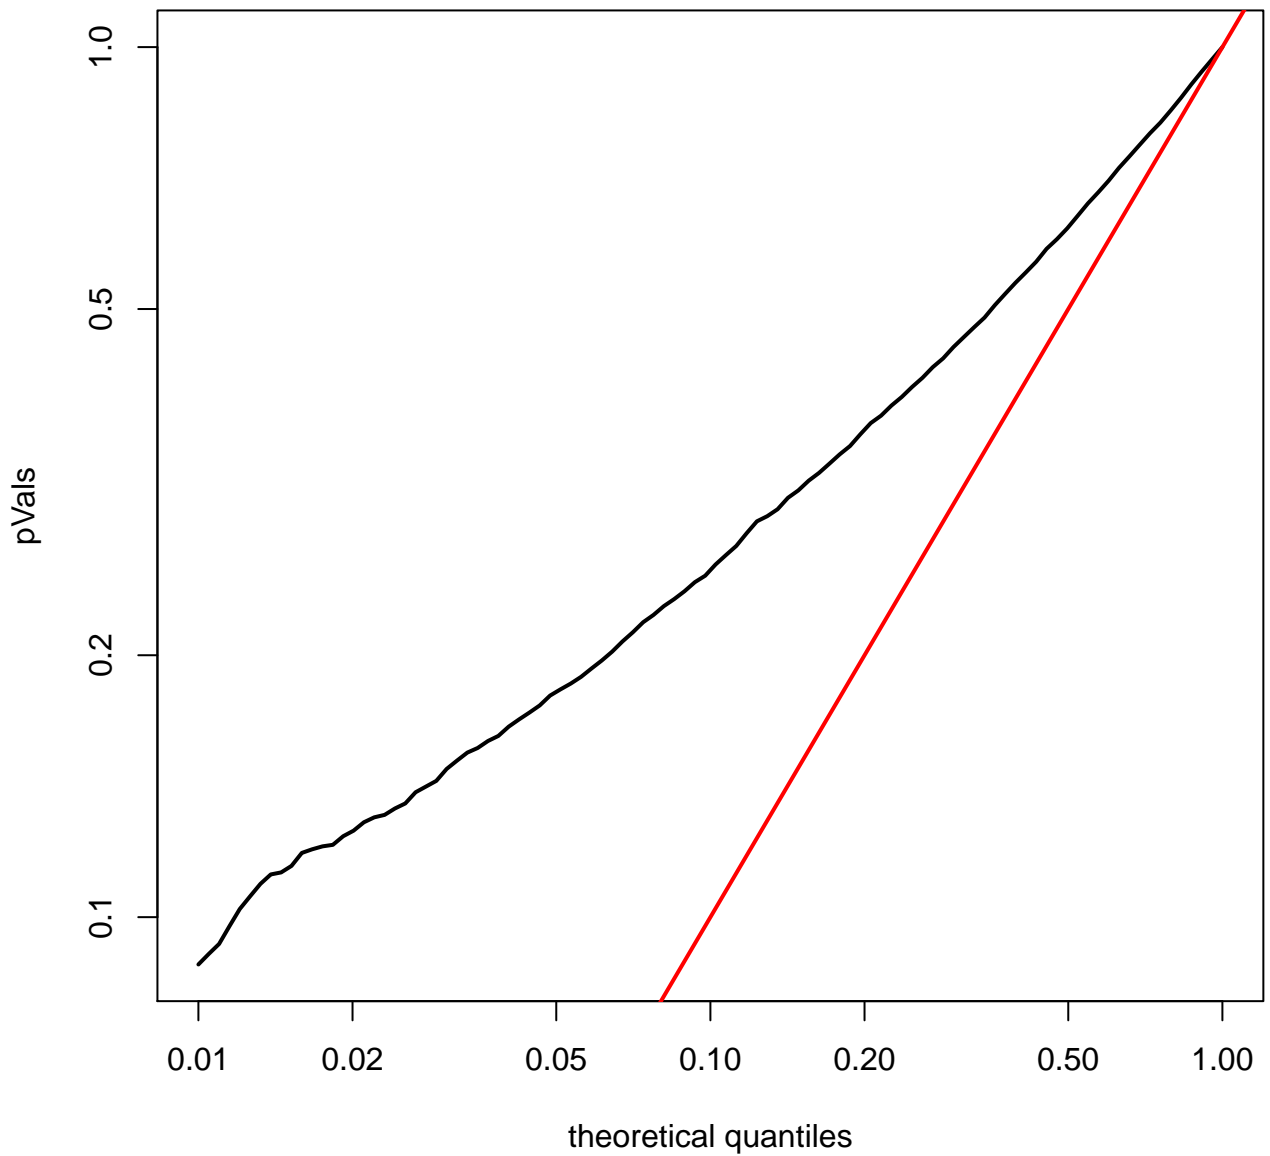

# Cumulative p-value distribution for LAML

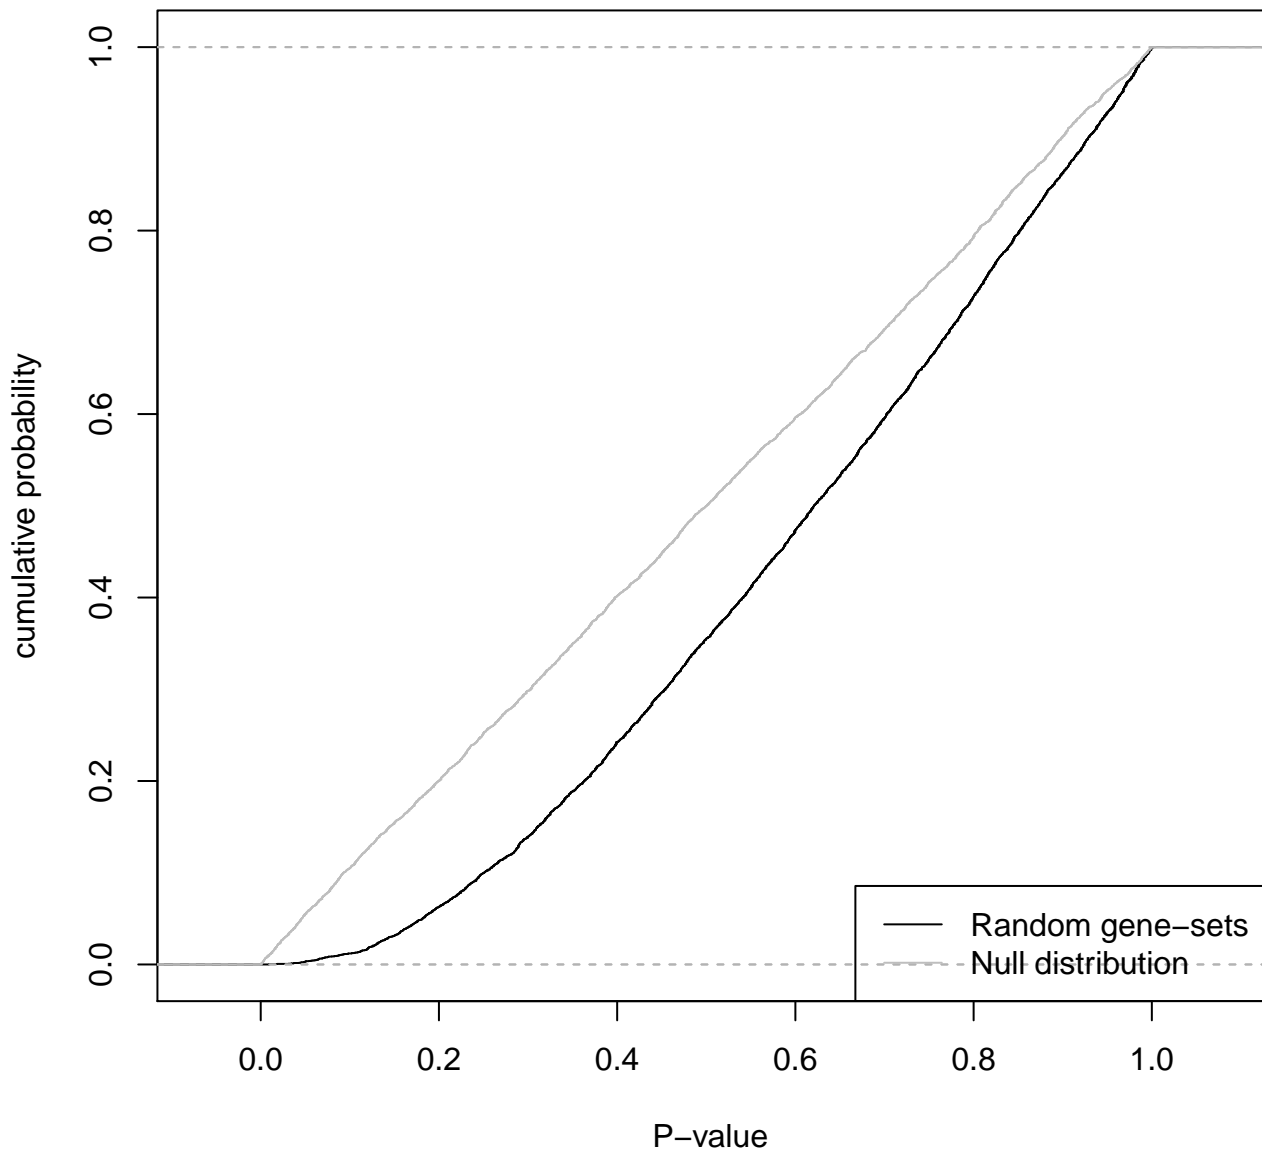

# Histogram for pVals for LGG

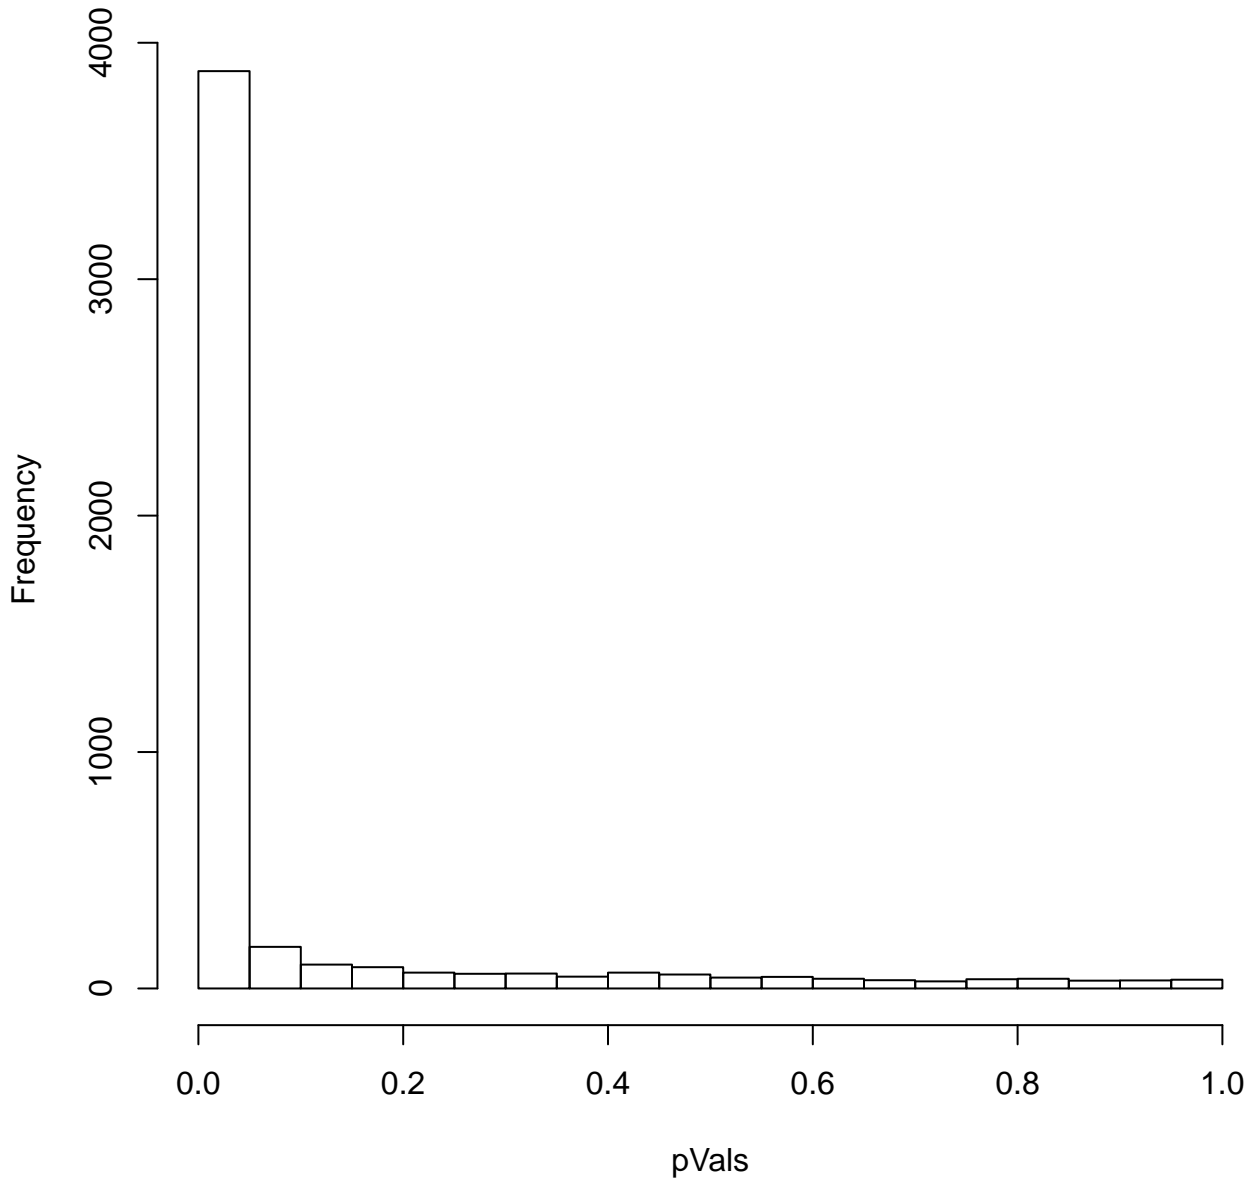

quantile plot for LGG

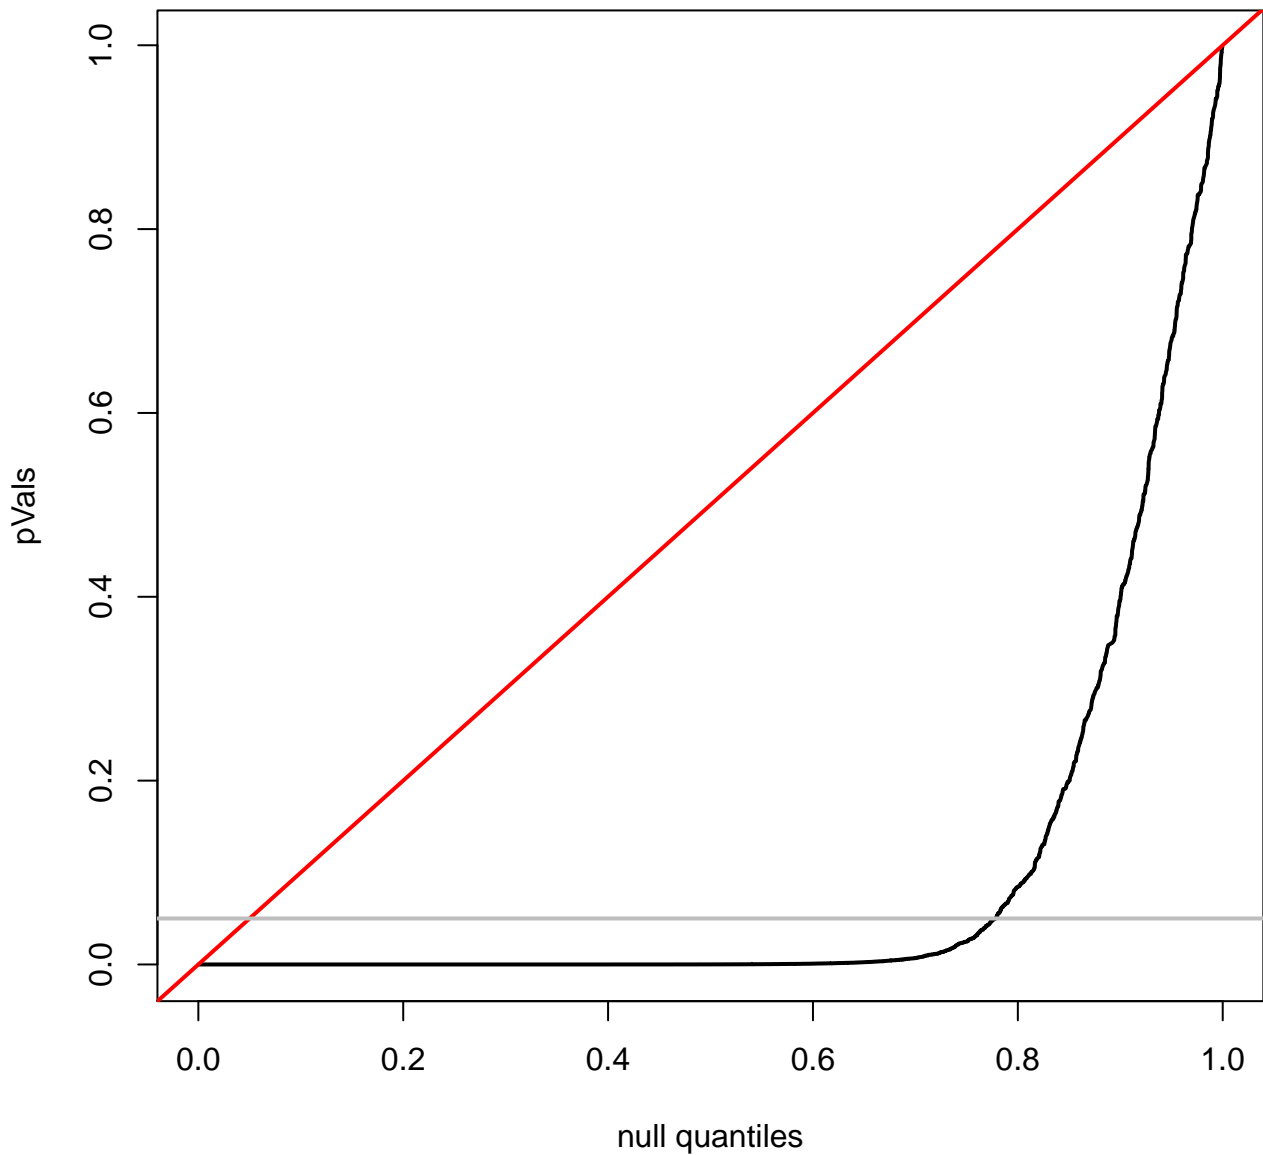

quantile plot for LGG  
(log-scale)

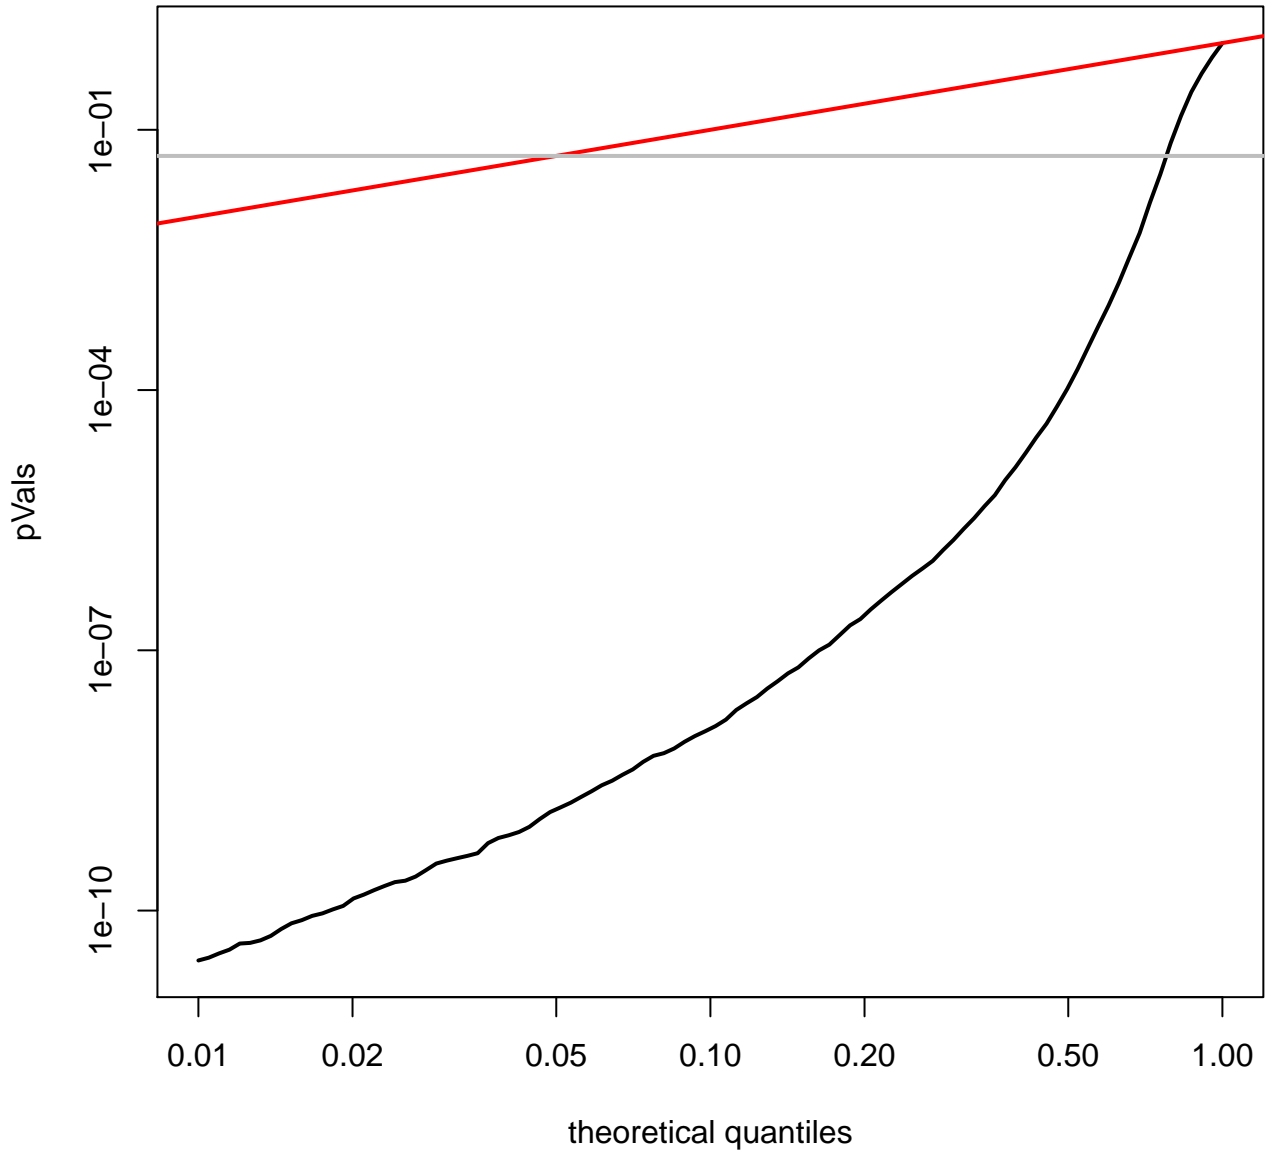

# Cumulative p-value distribution for LGG

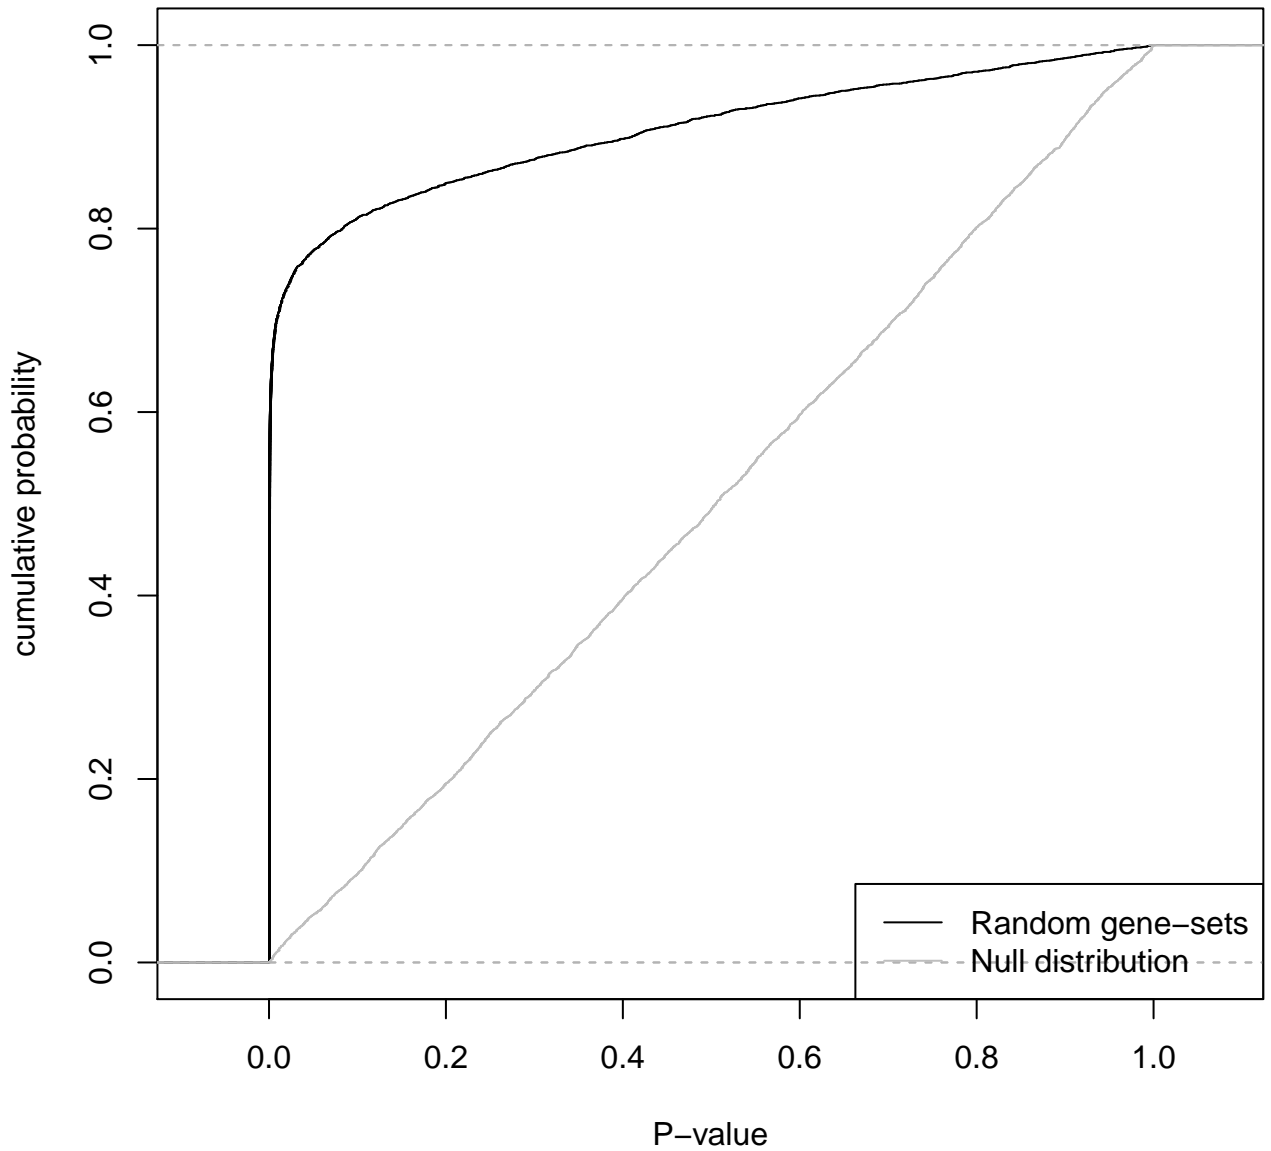



# Histogram for pVals for LHC

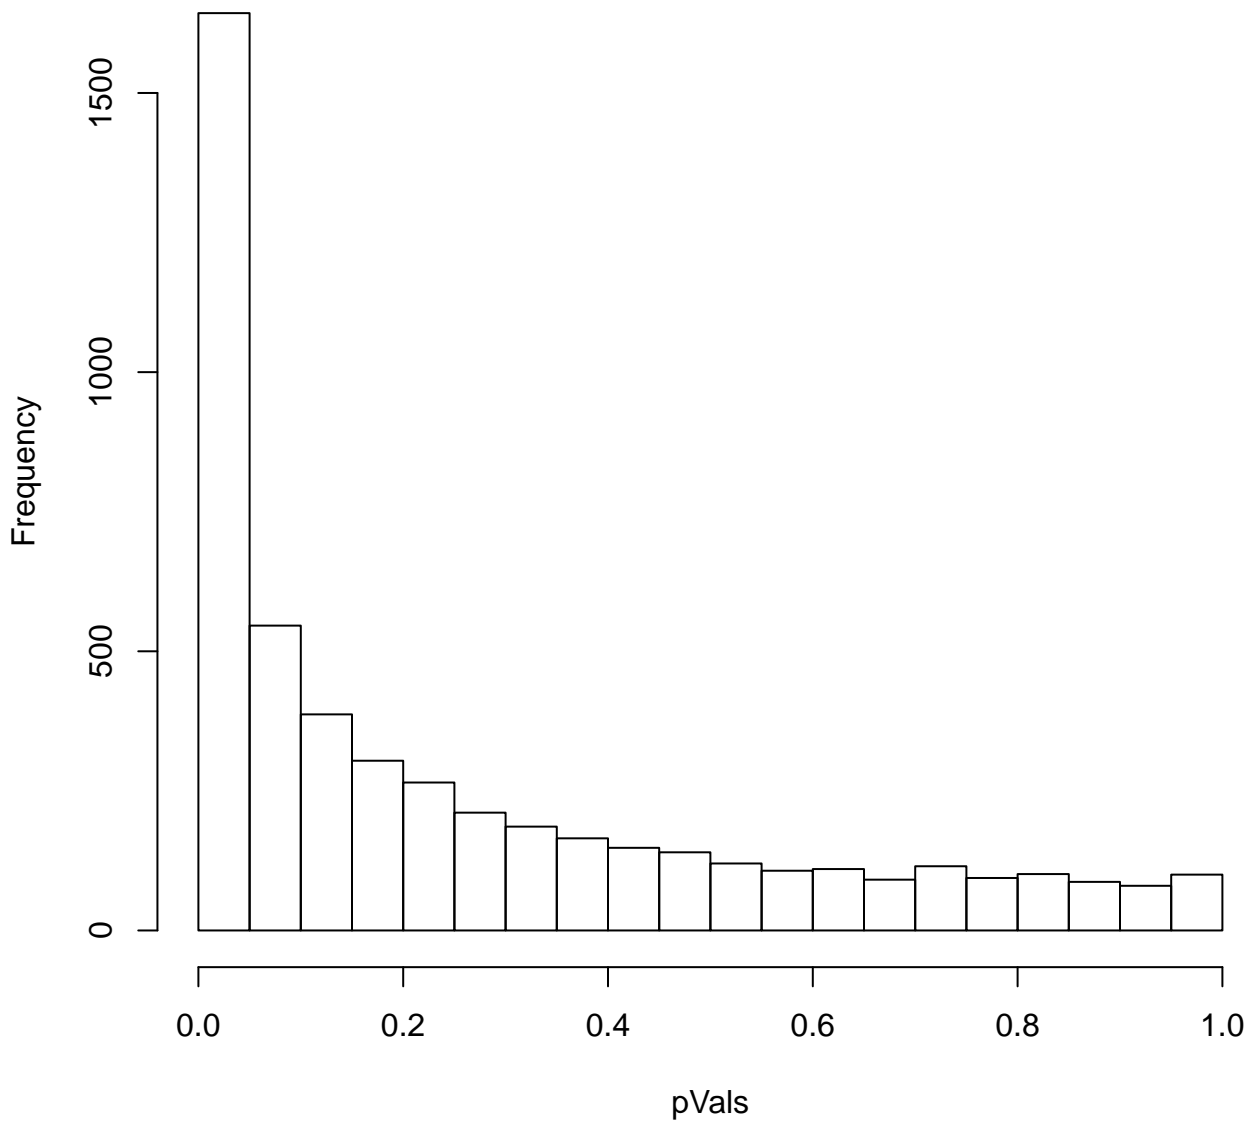

quantile plot for LHC

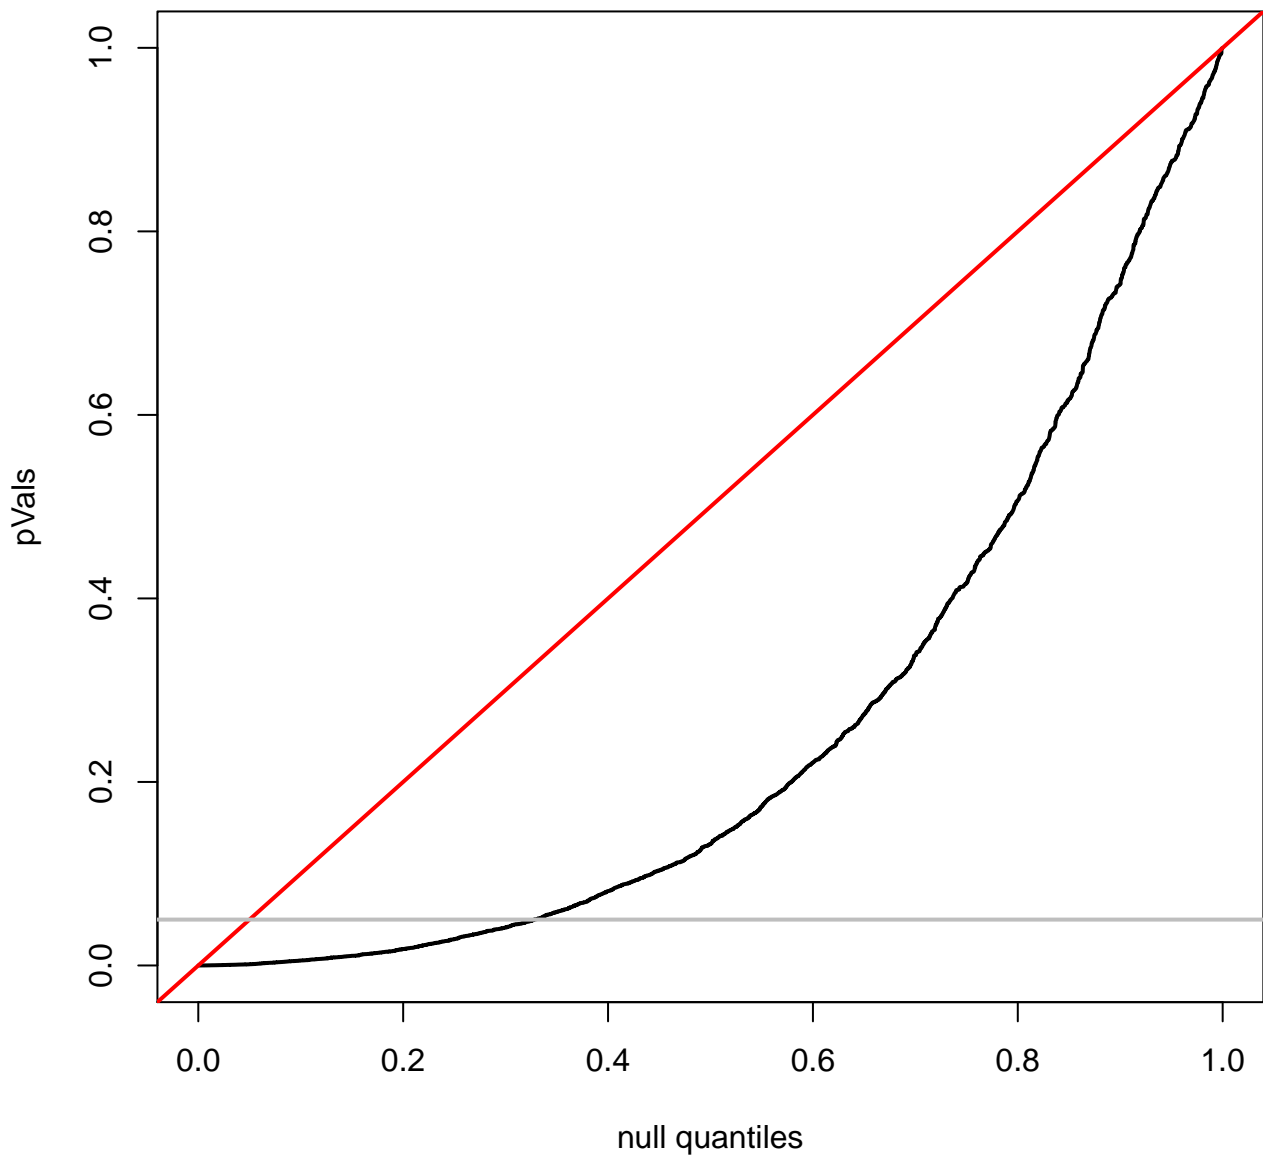

quantile plot for LHC  
(log-scale)

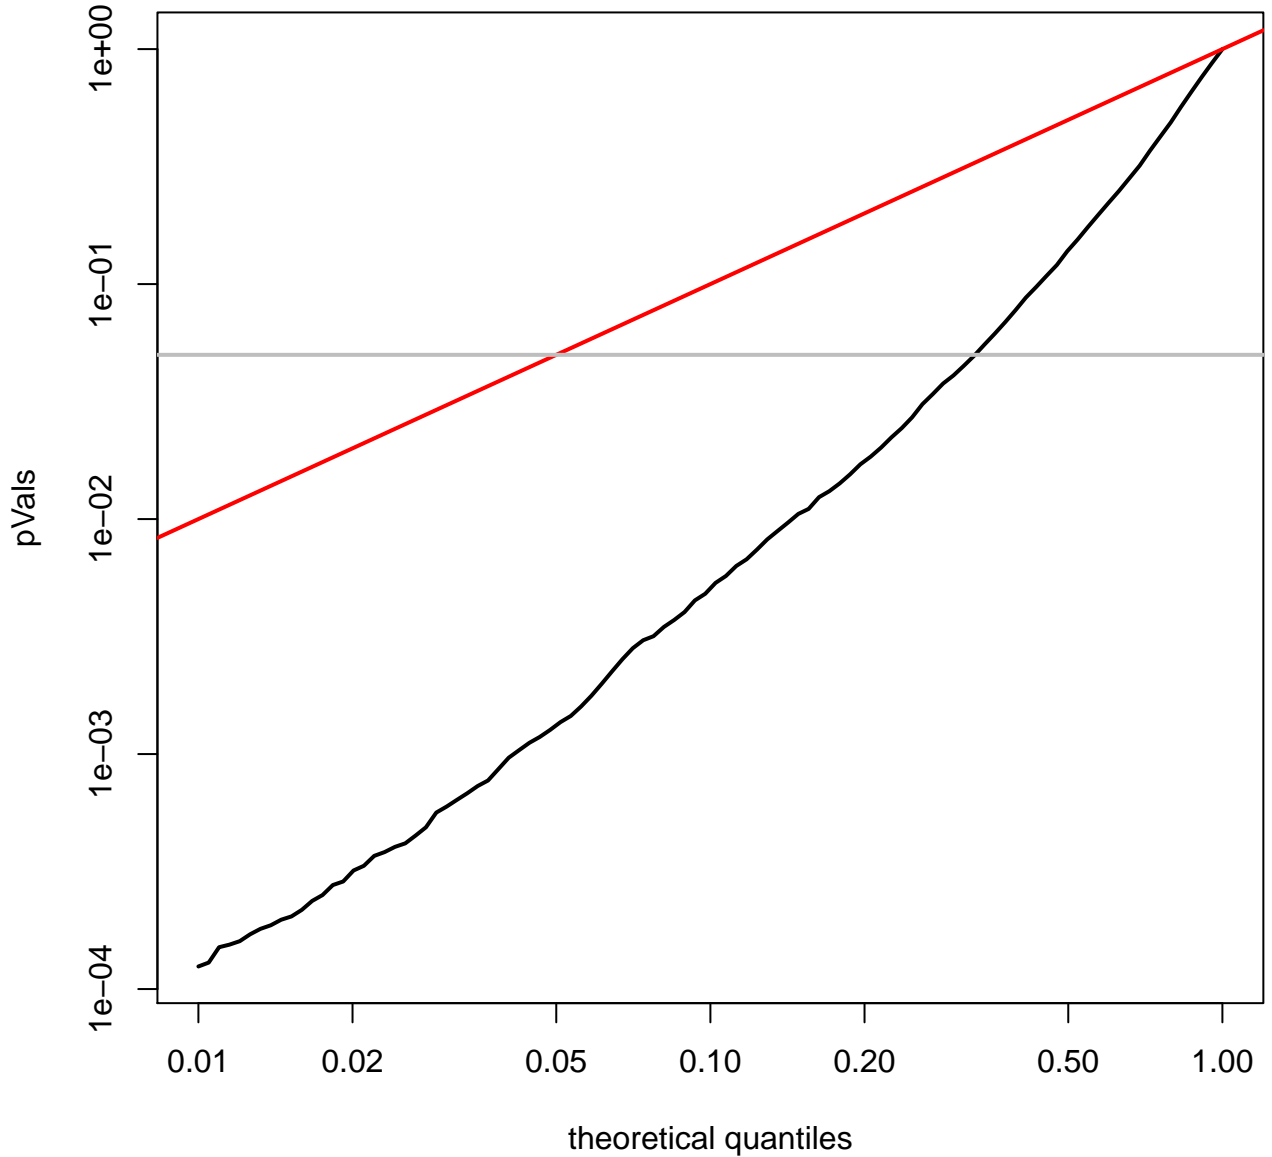

# Cumulative p-value distribution for LHC

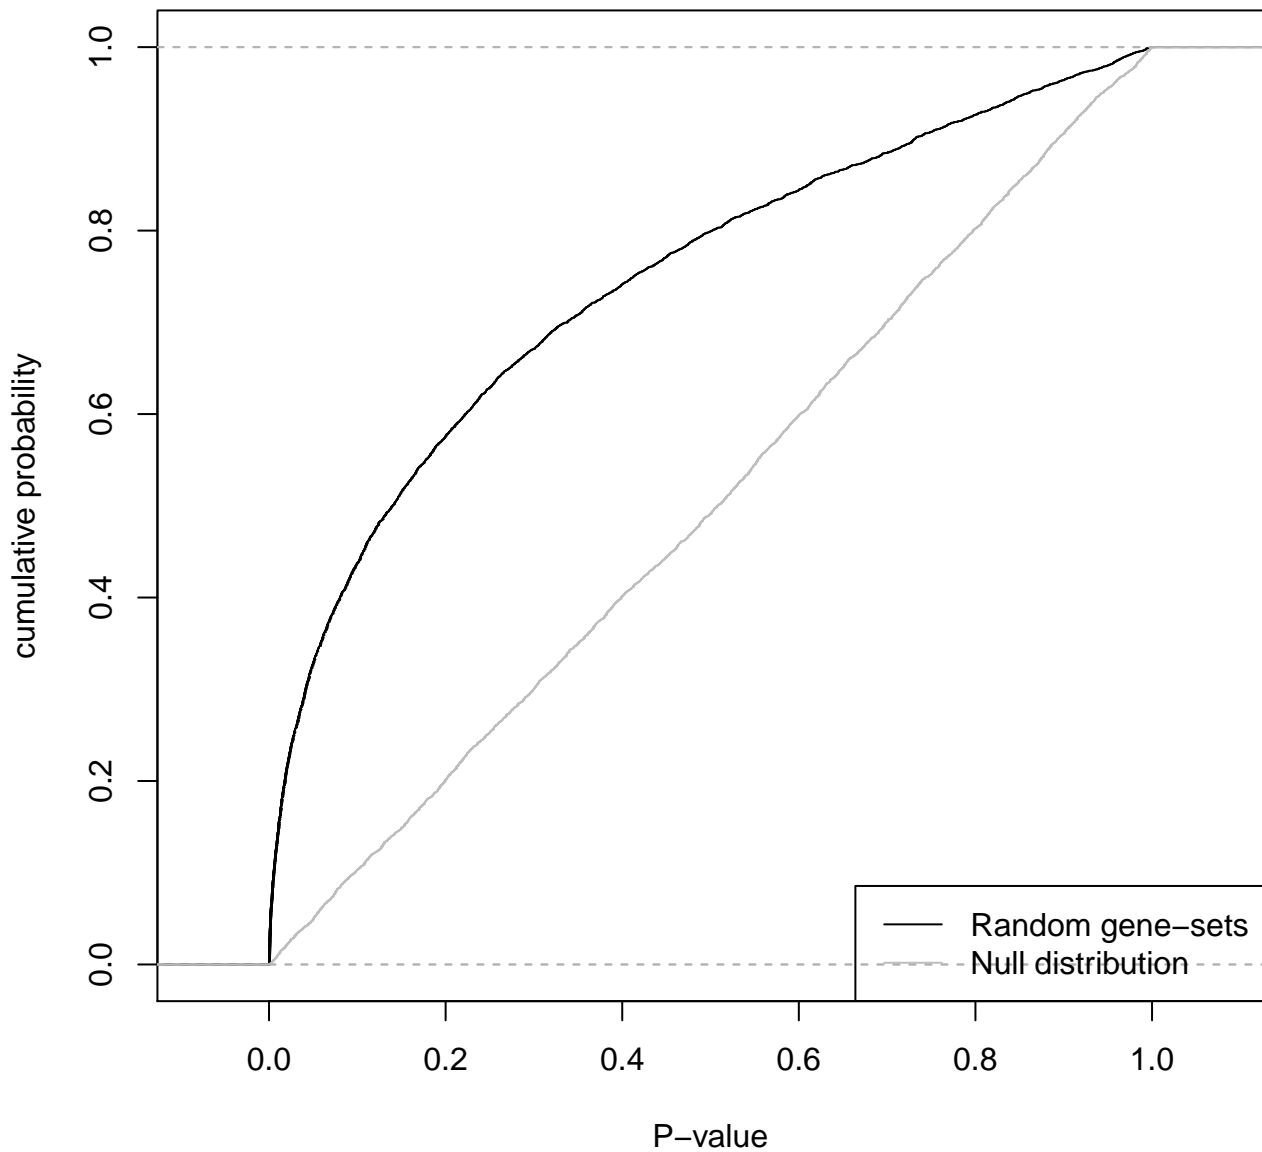

# Histogram for pVals for LUAD

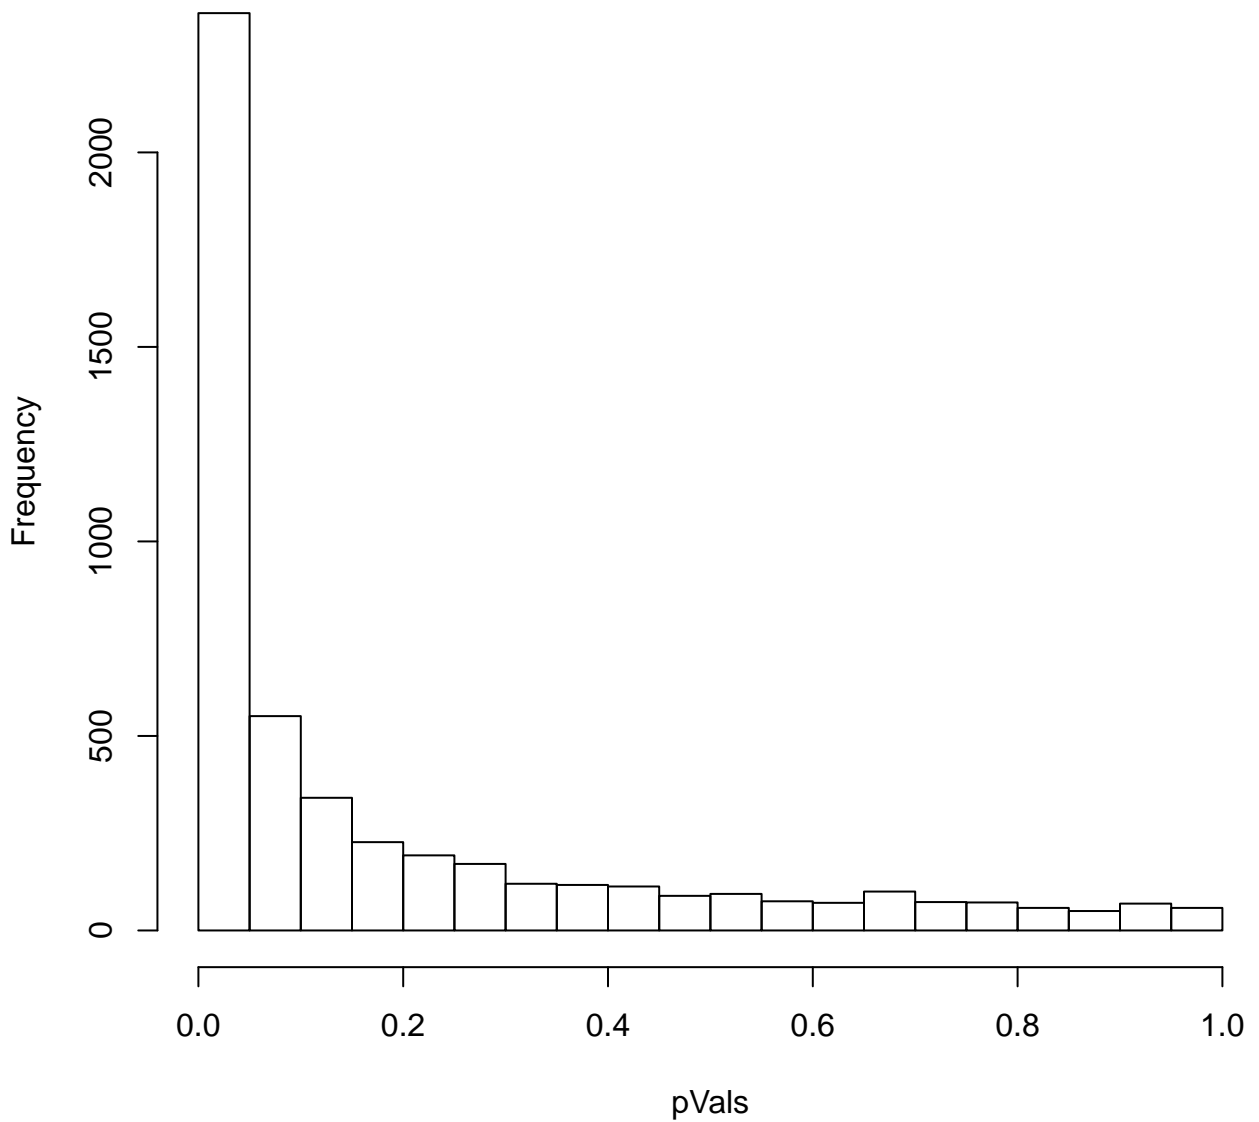

quantile plot for LUAD

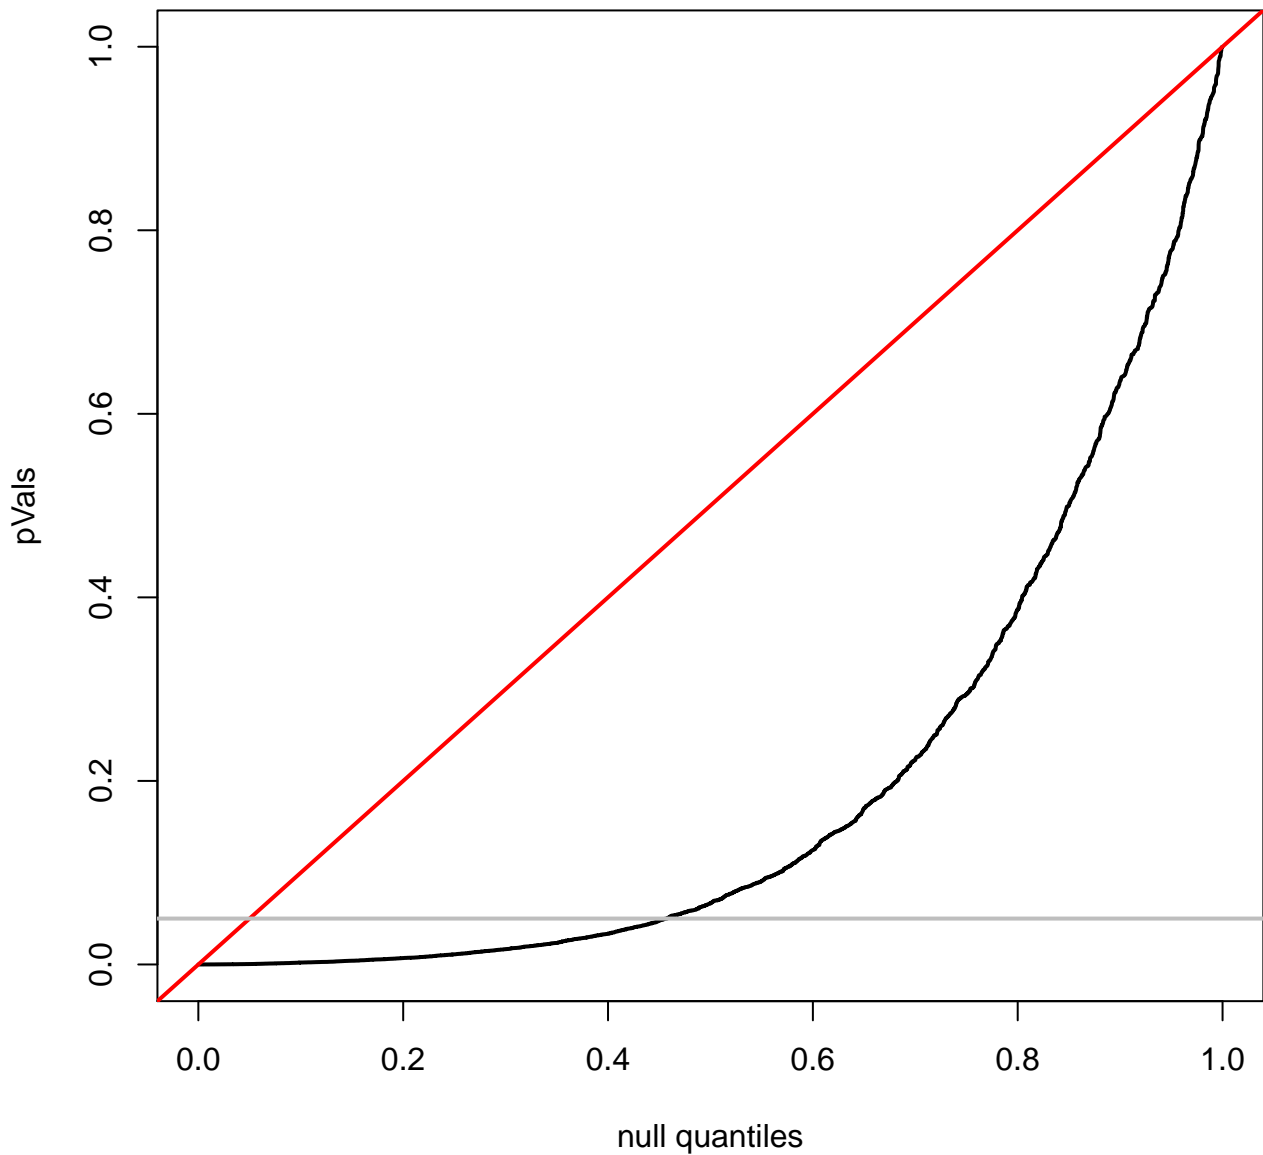

quantile plot for LUAD  
(log-scale)

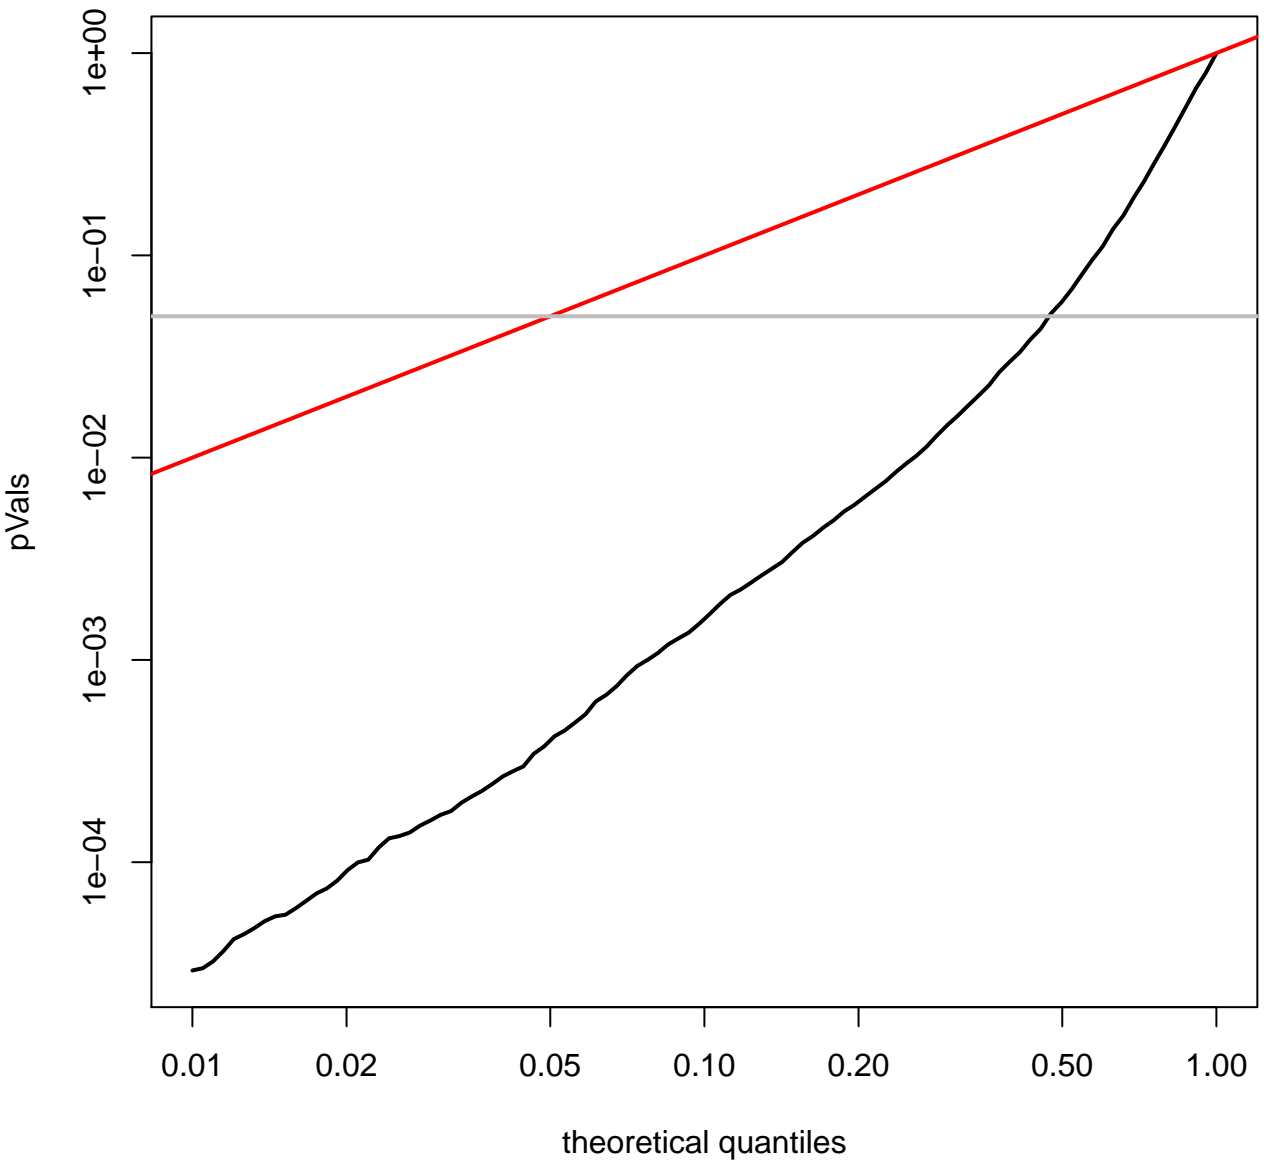

# Cumulative p-value distribution for LUAD

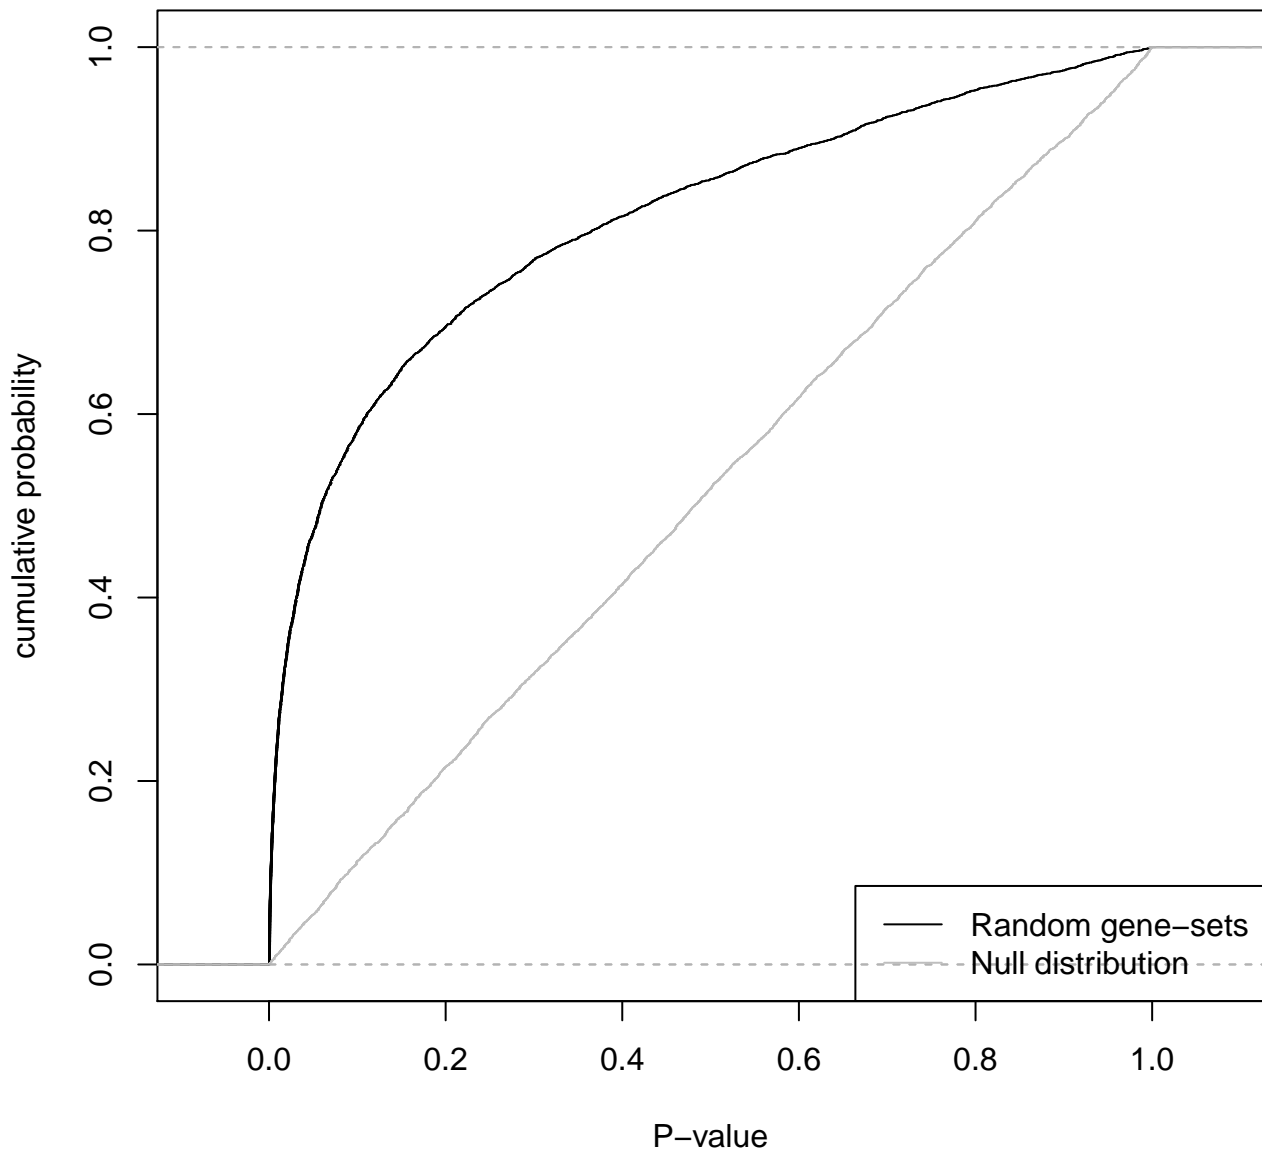



# Histogram for pVals for LUSC

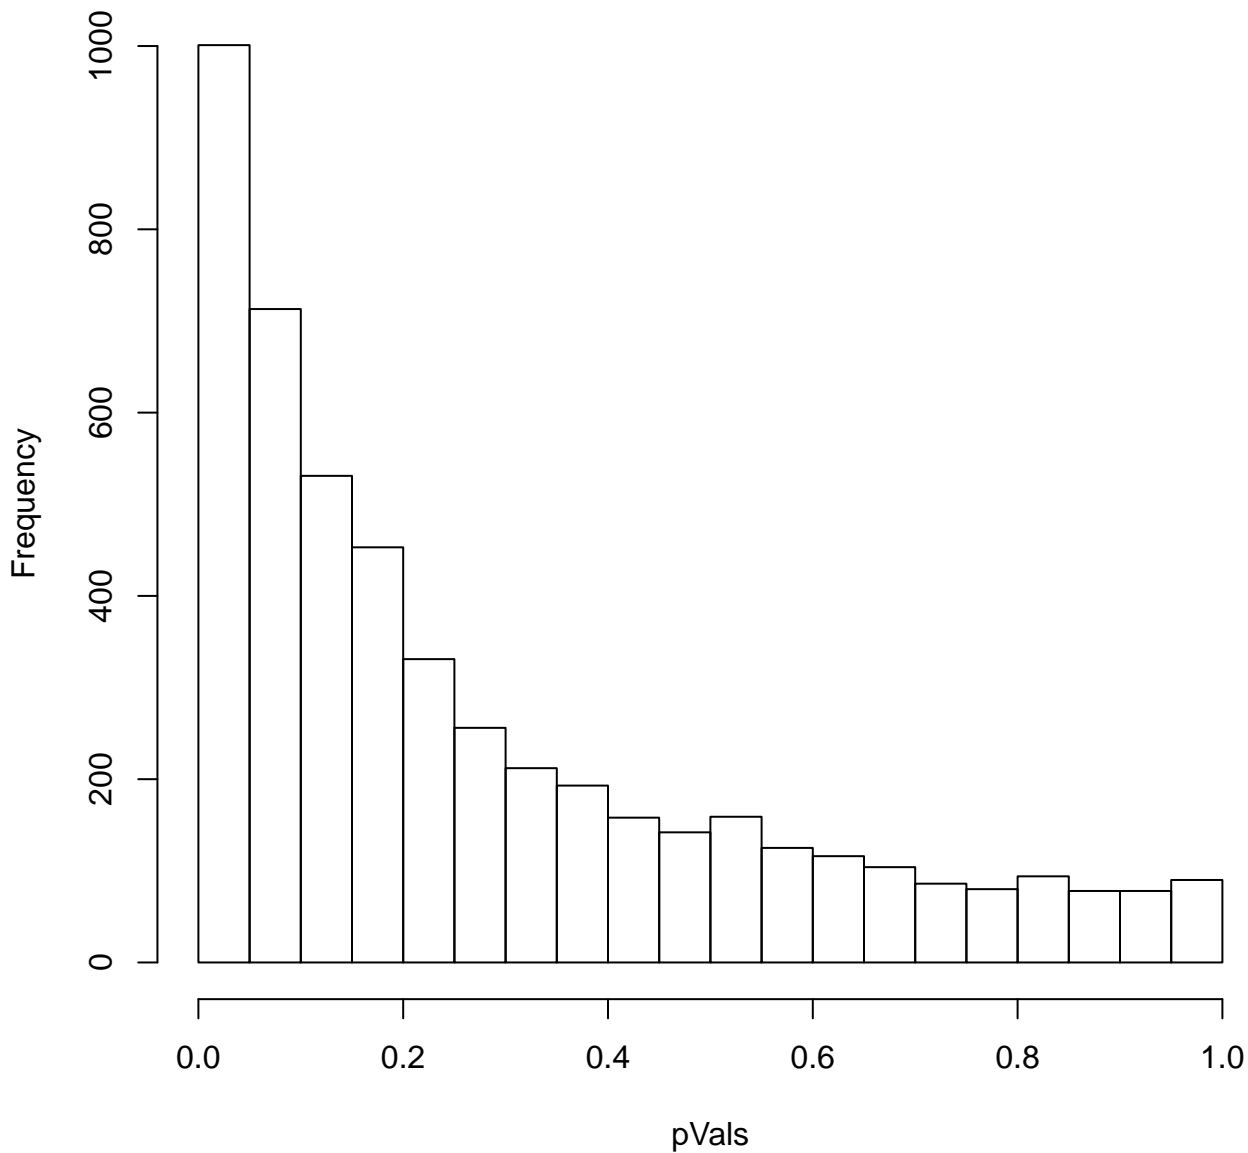

quantile plot for LUSC

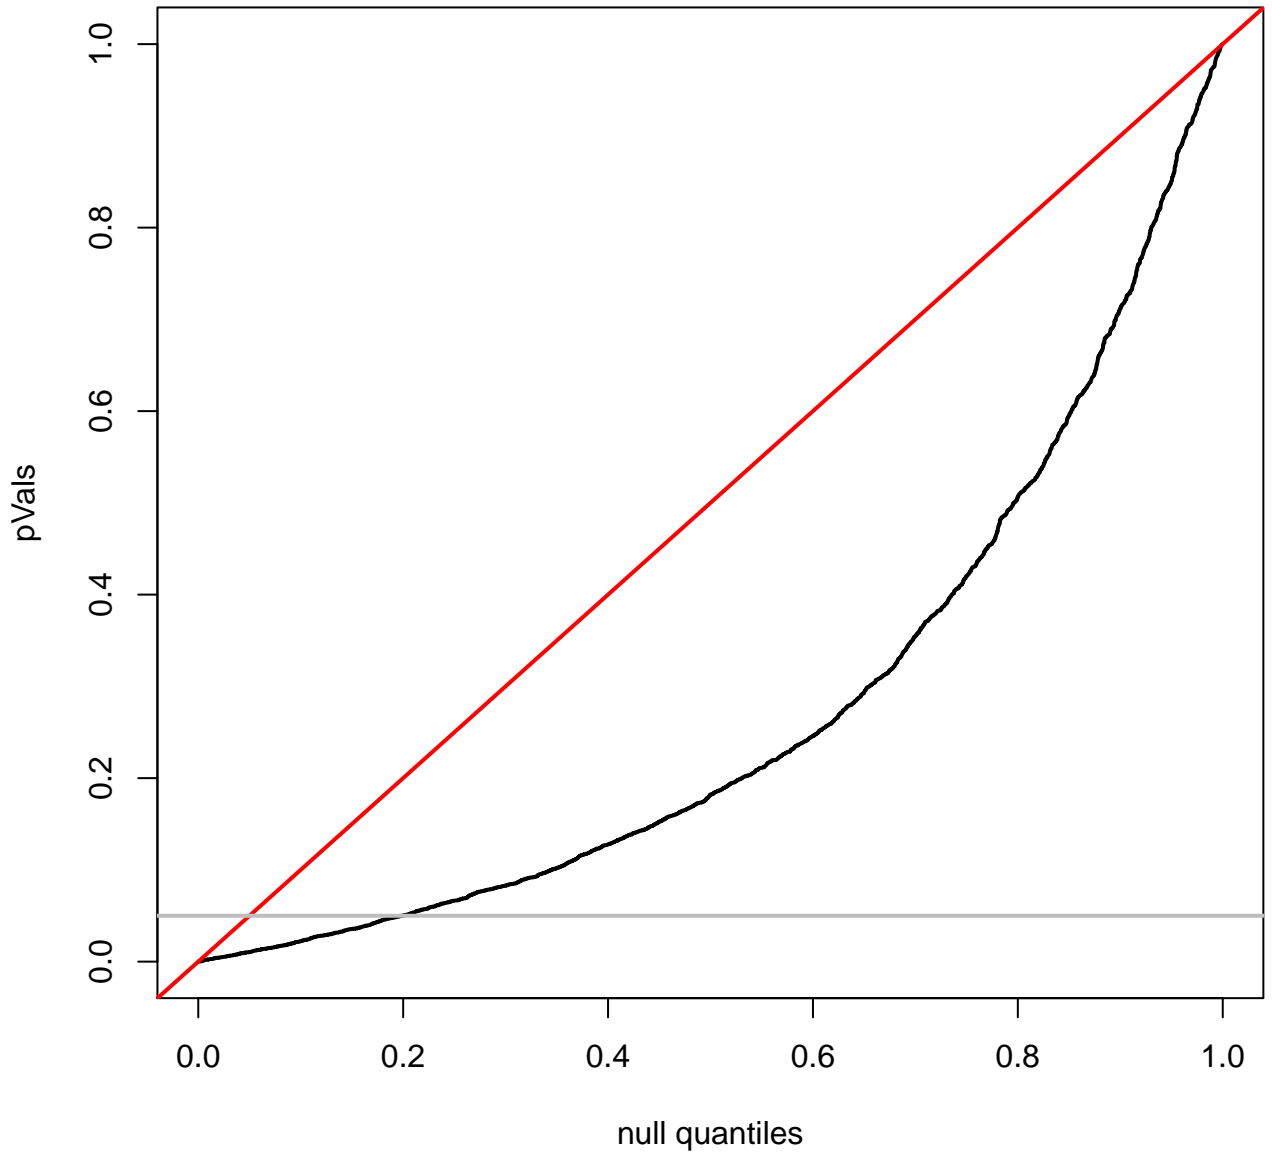

quantile plot for LUSC  
(log-scale)

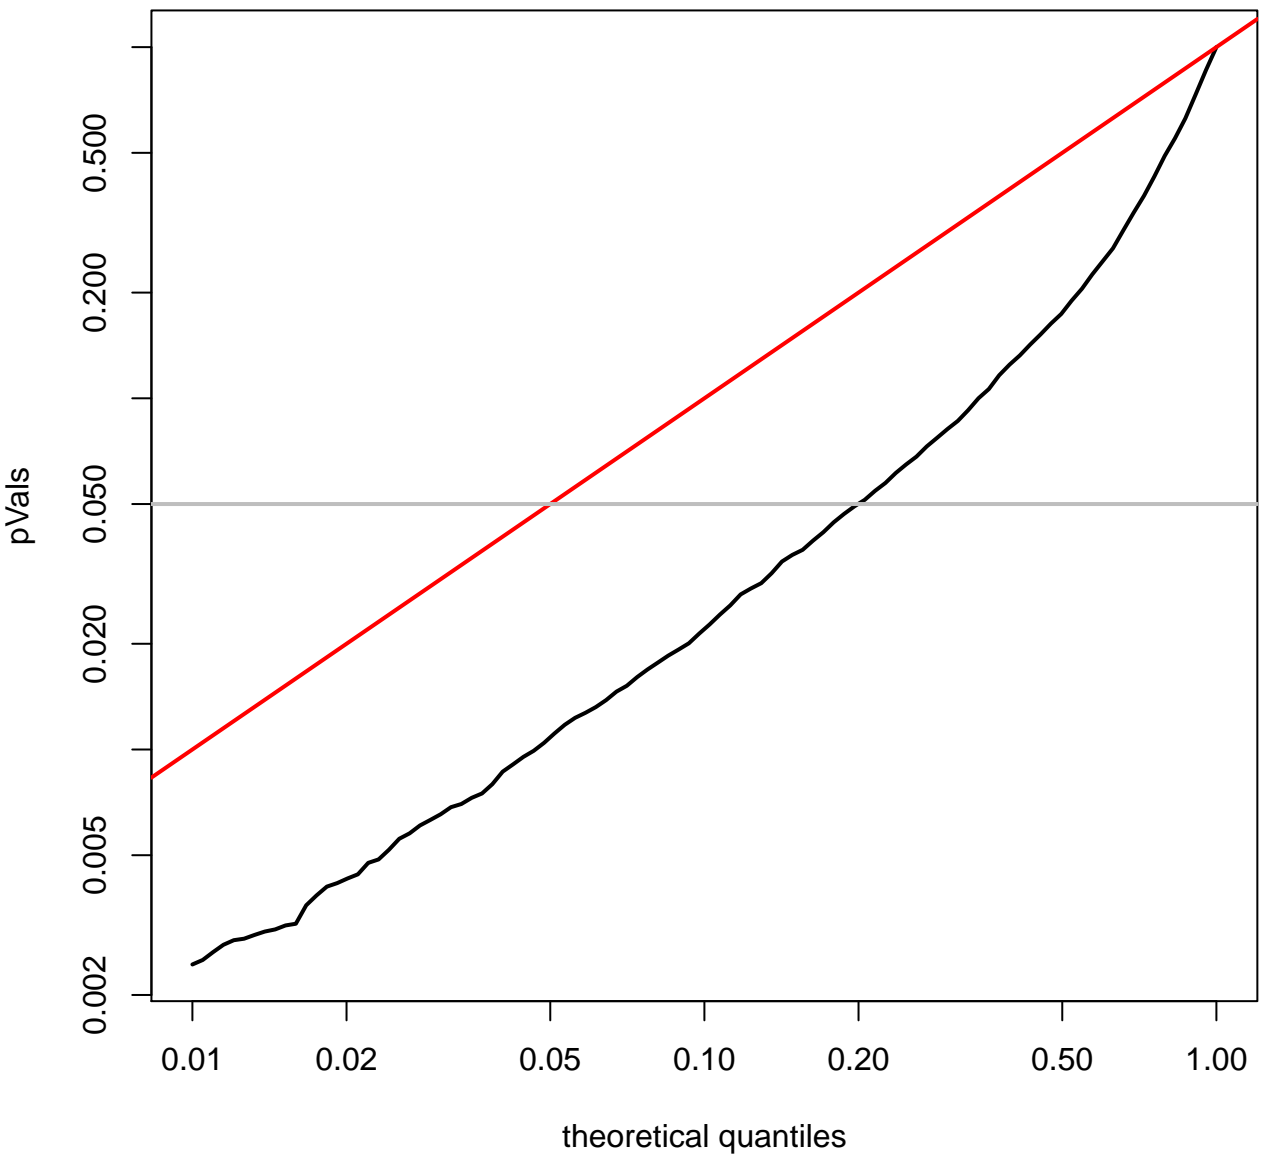

# Cumulative p-value distribution for LUSC

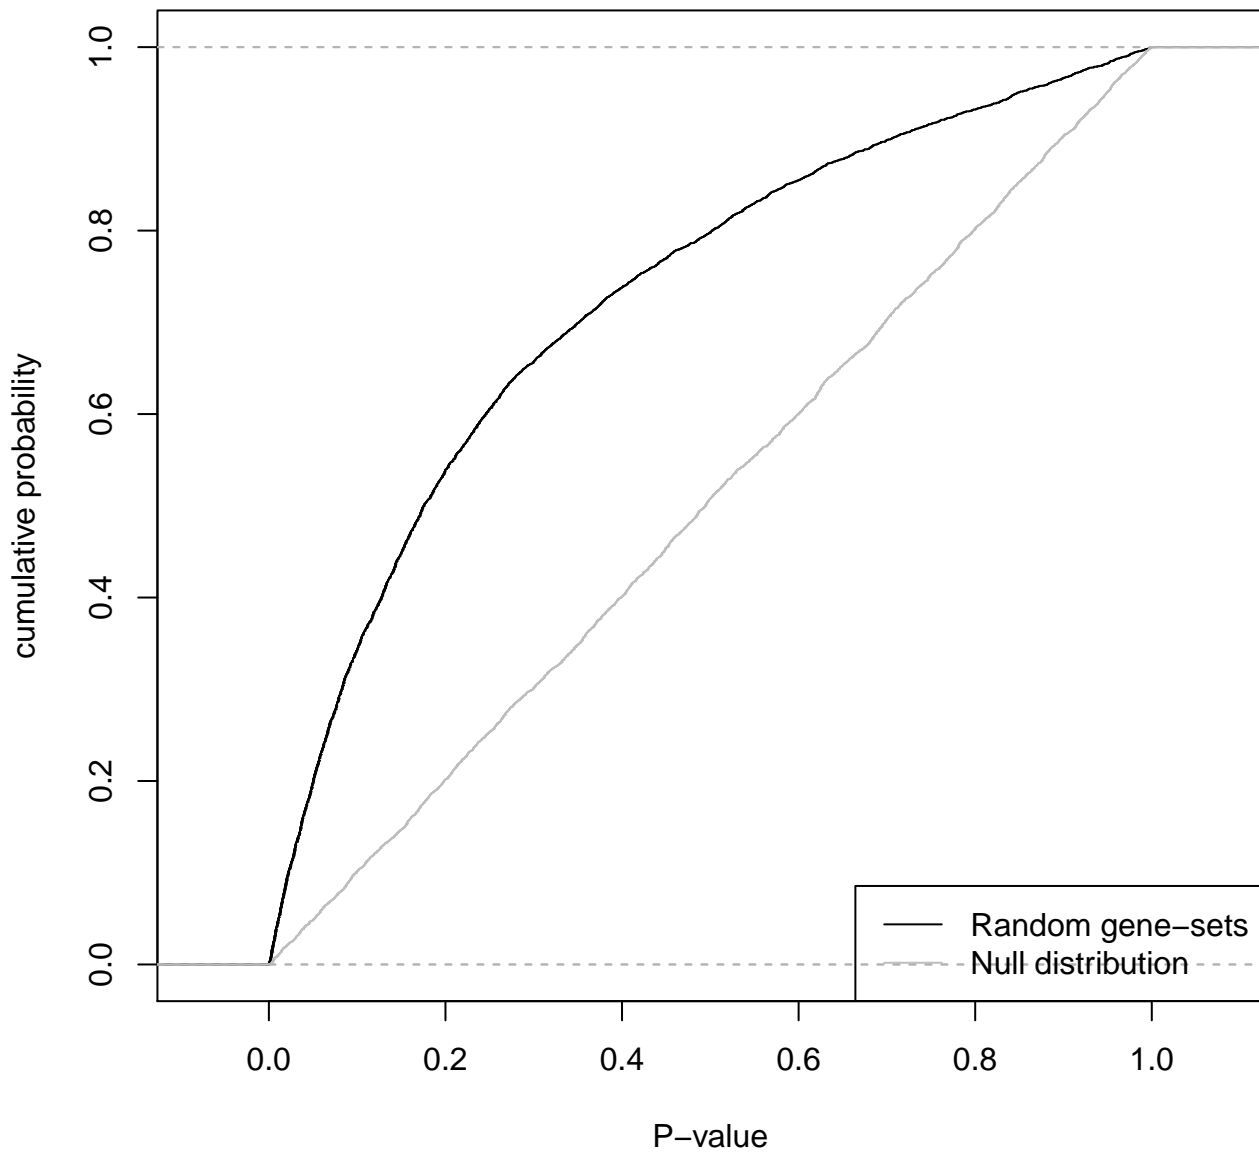

# Histogram for pVals for MESO

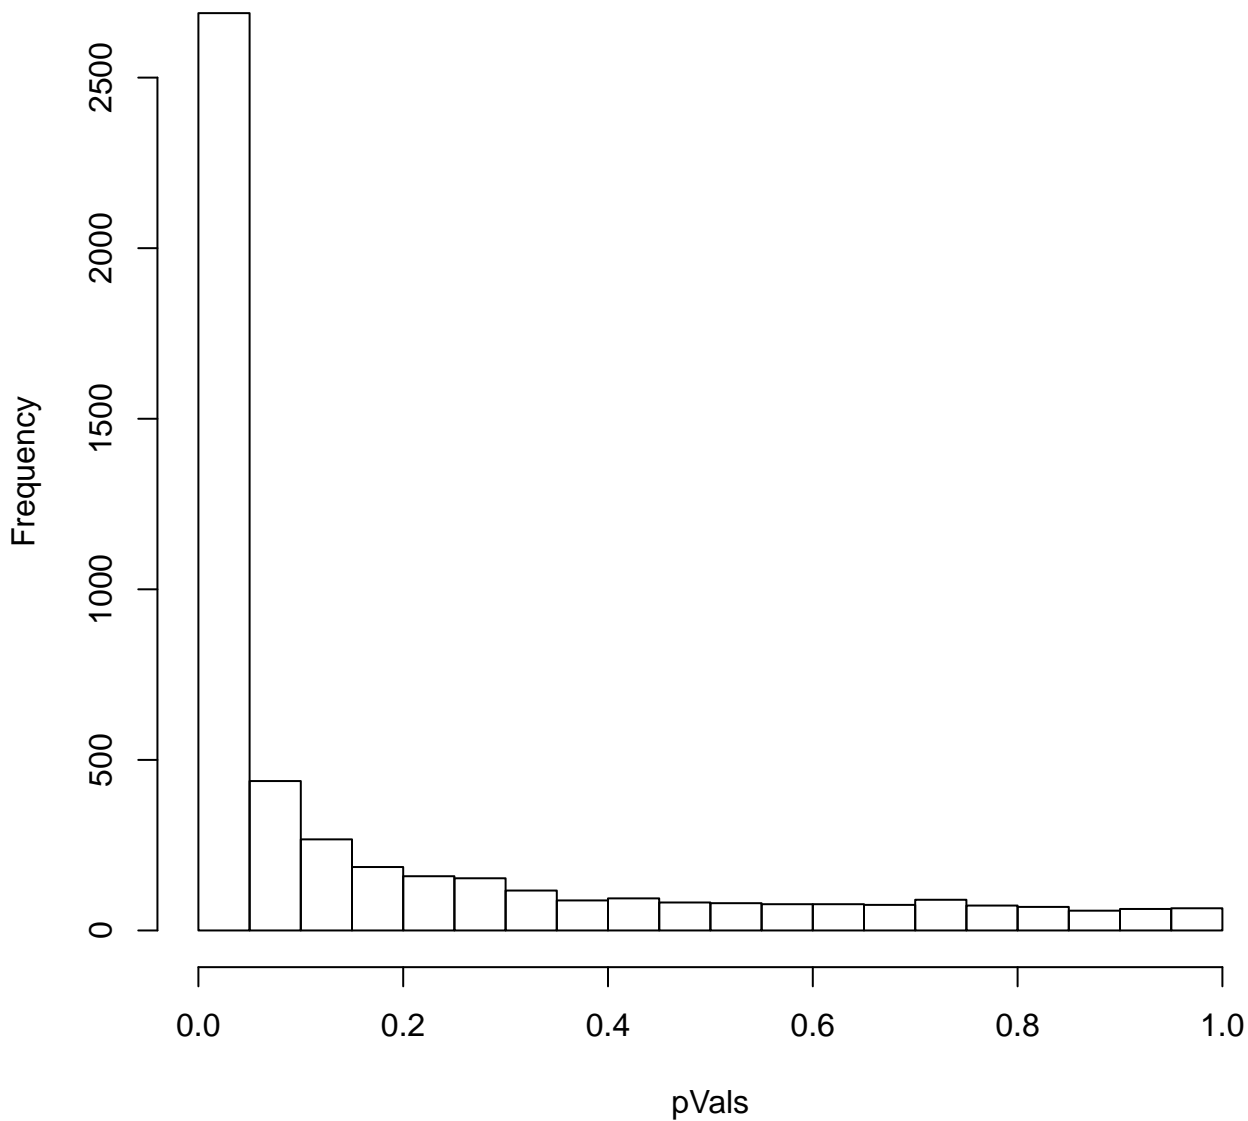

# quantile plot for MESO

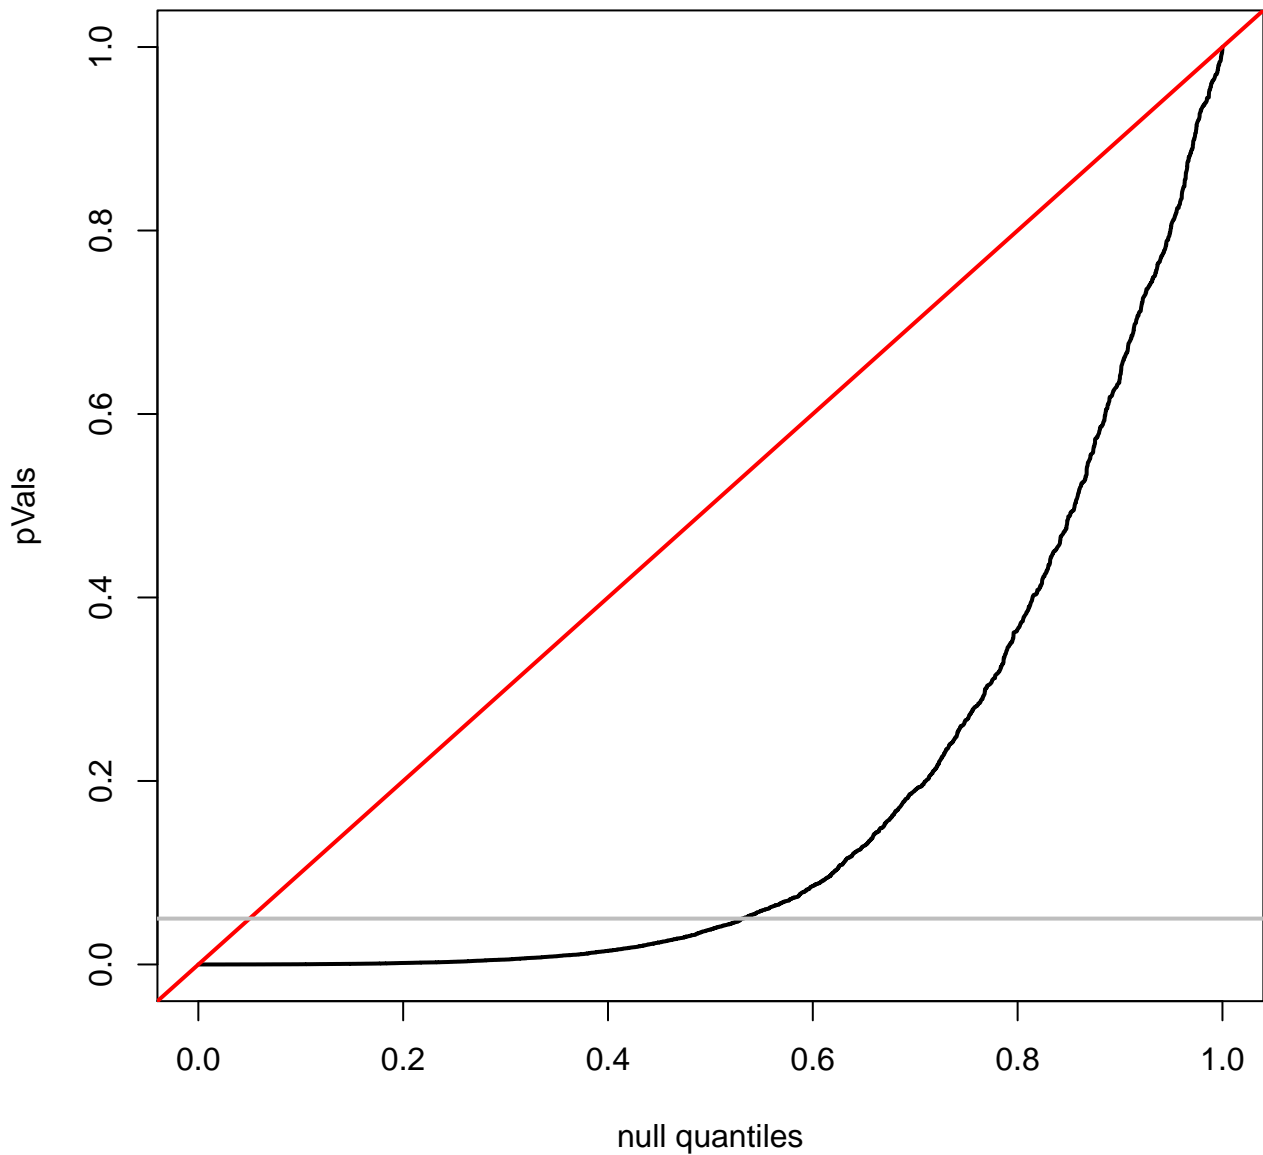

quantile plot for MESO  
(log-scale)

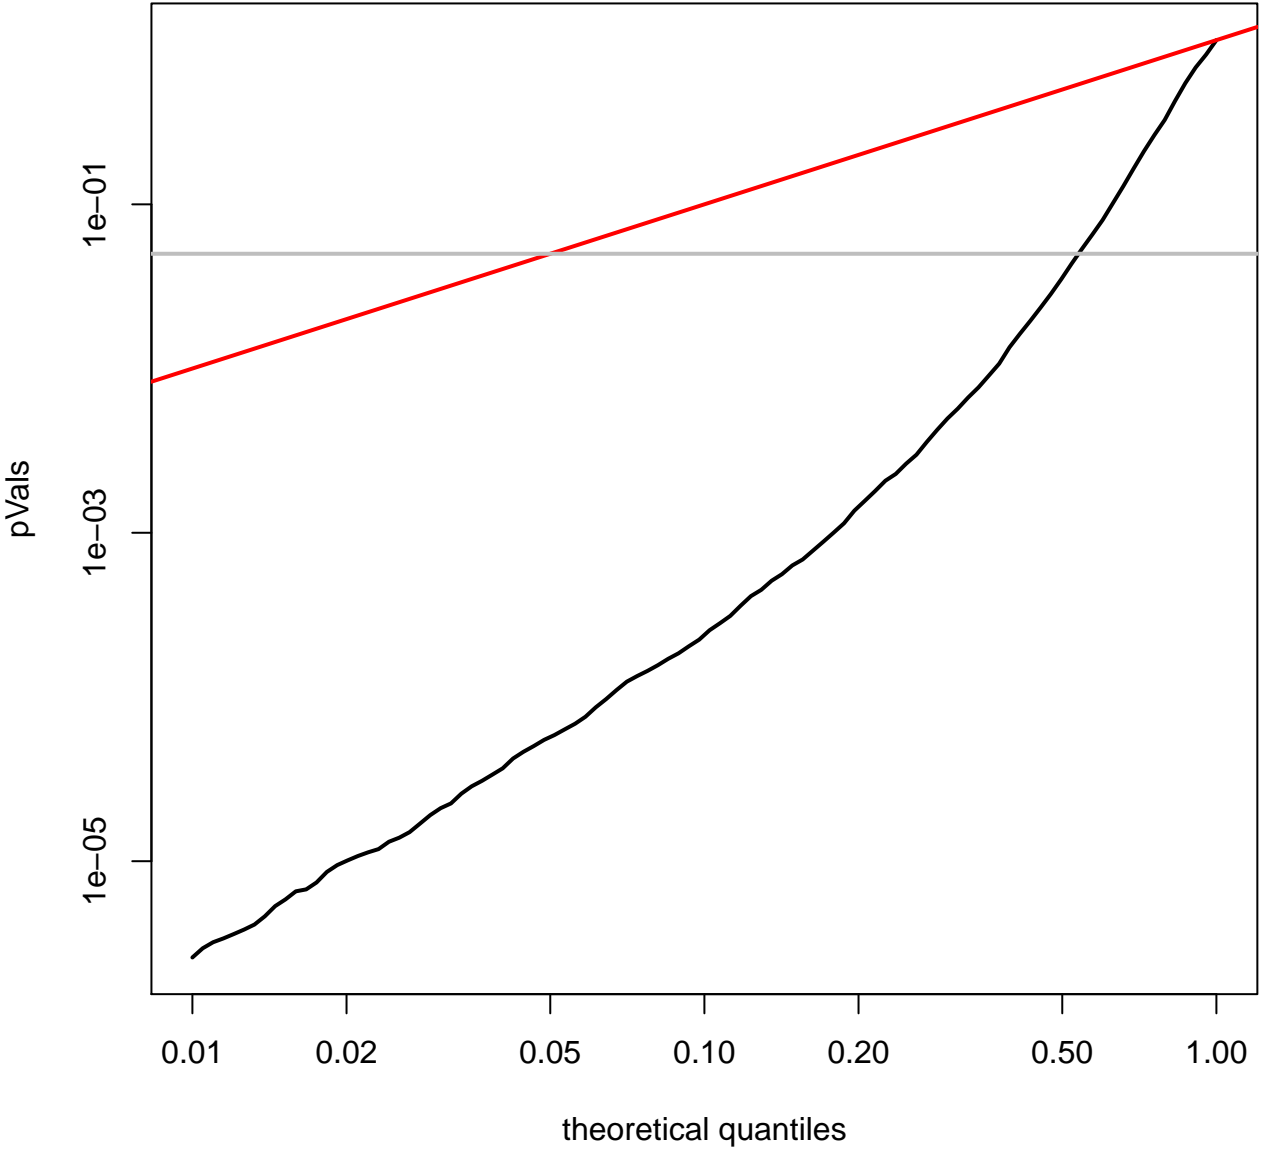

# Cumulative p-value distribution for MESO

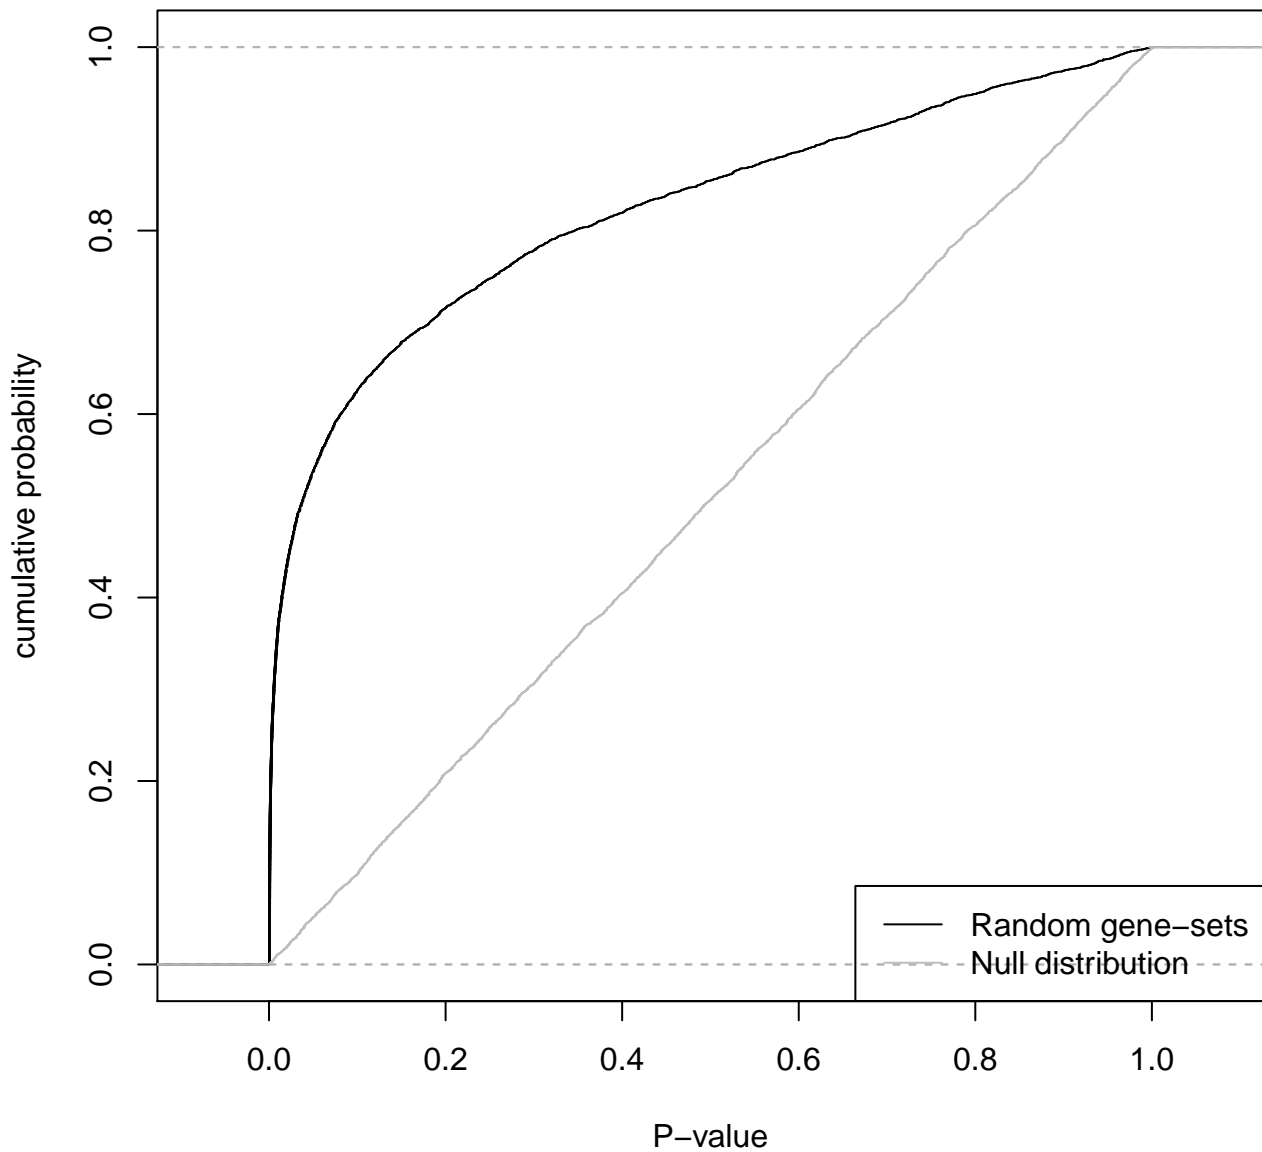



# Histogram for pVals for OV

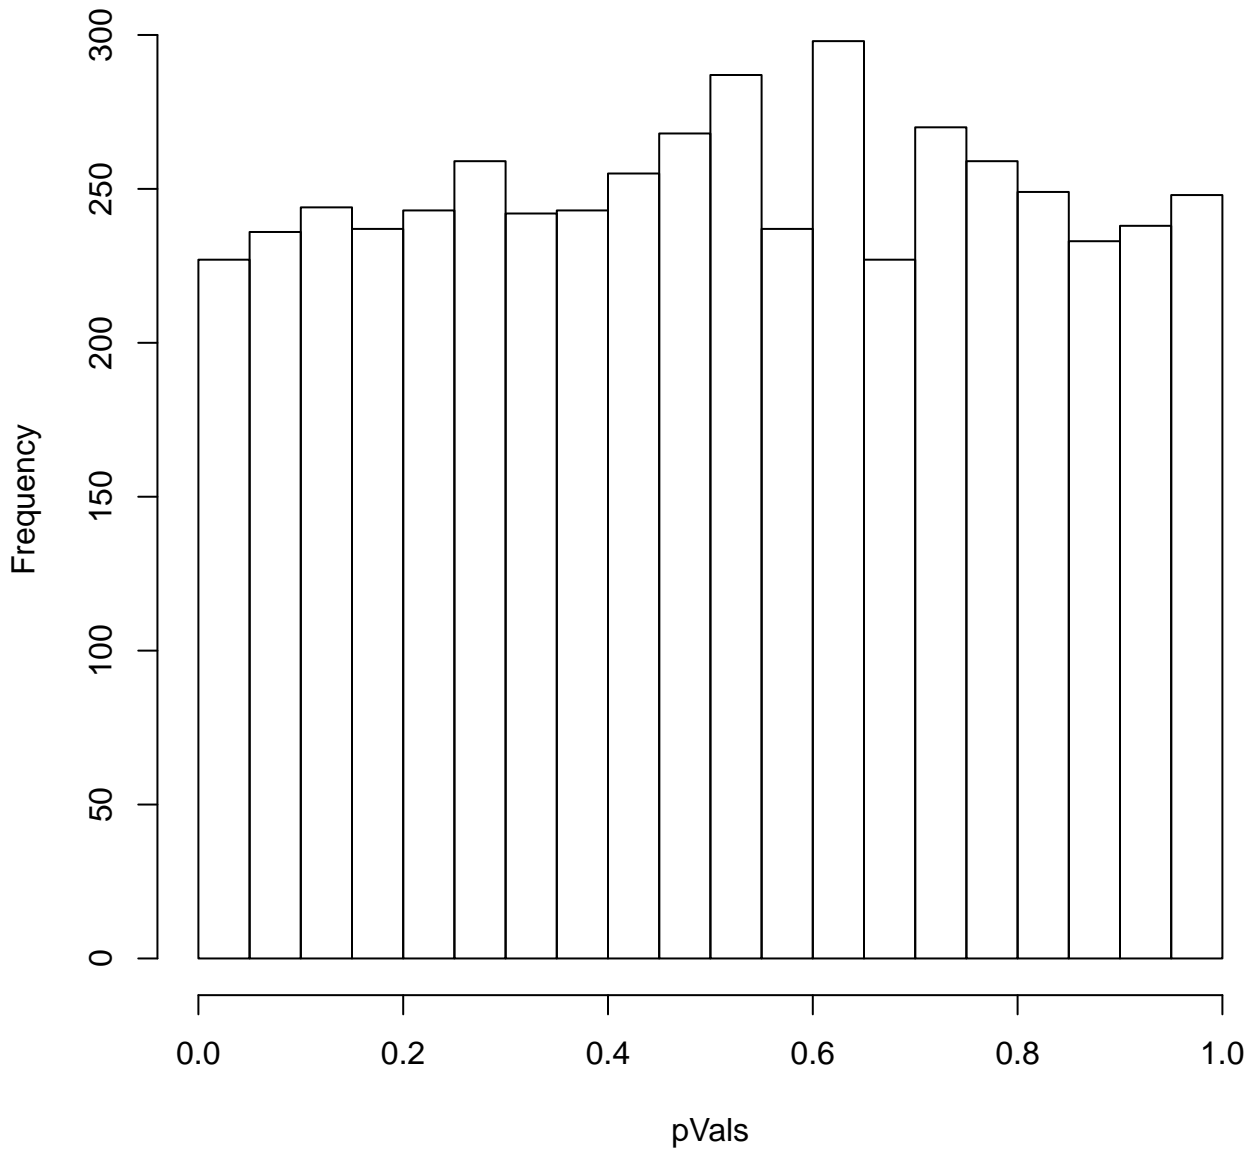

# quantile plot for OV

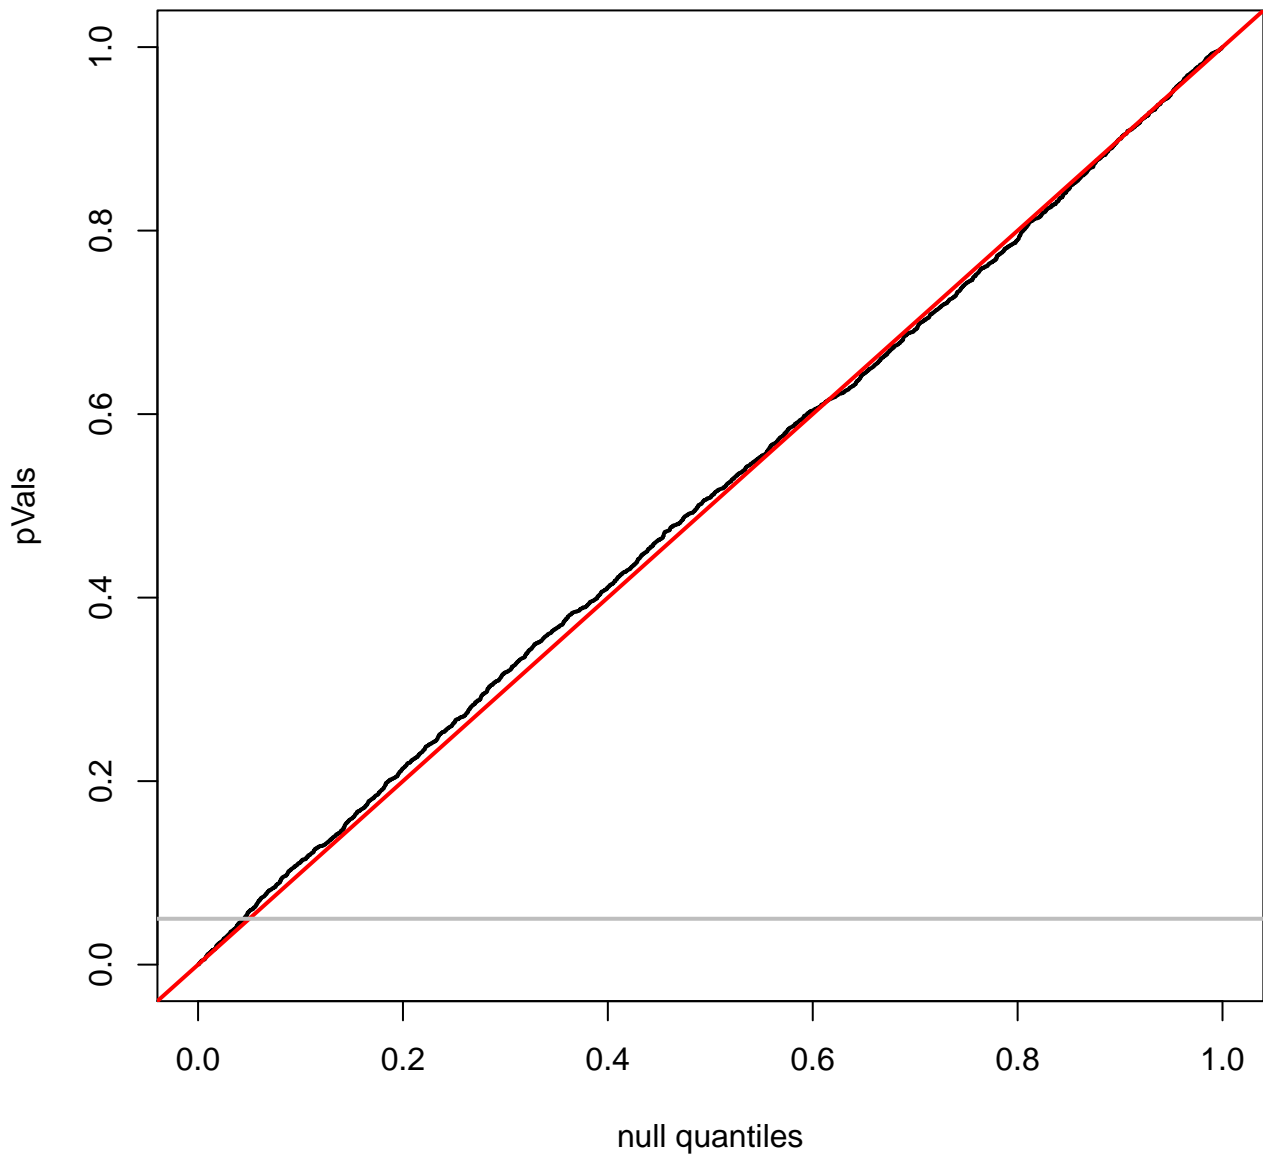

quantile plot for OV  
(log-scale)

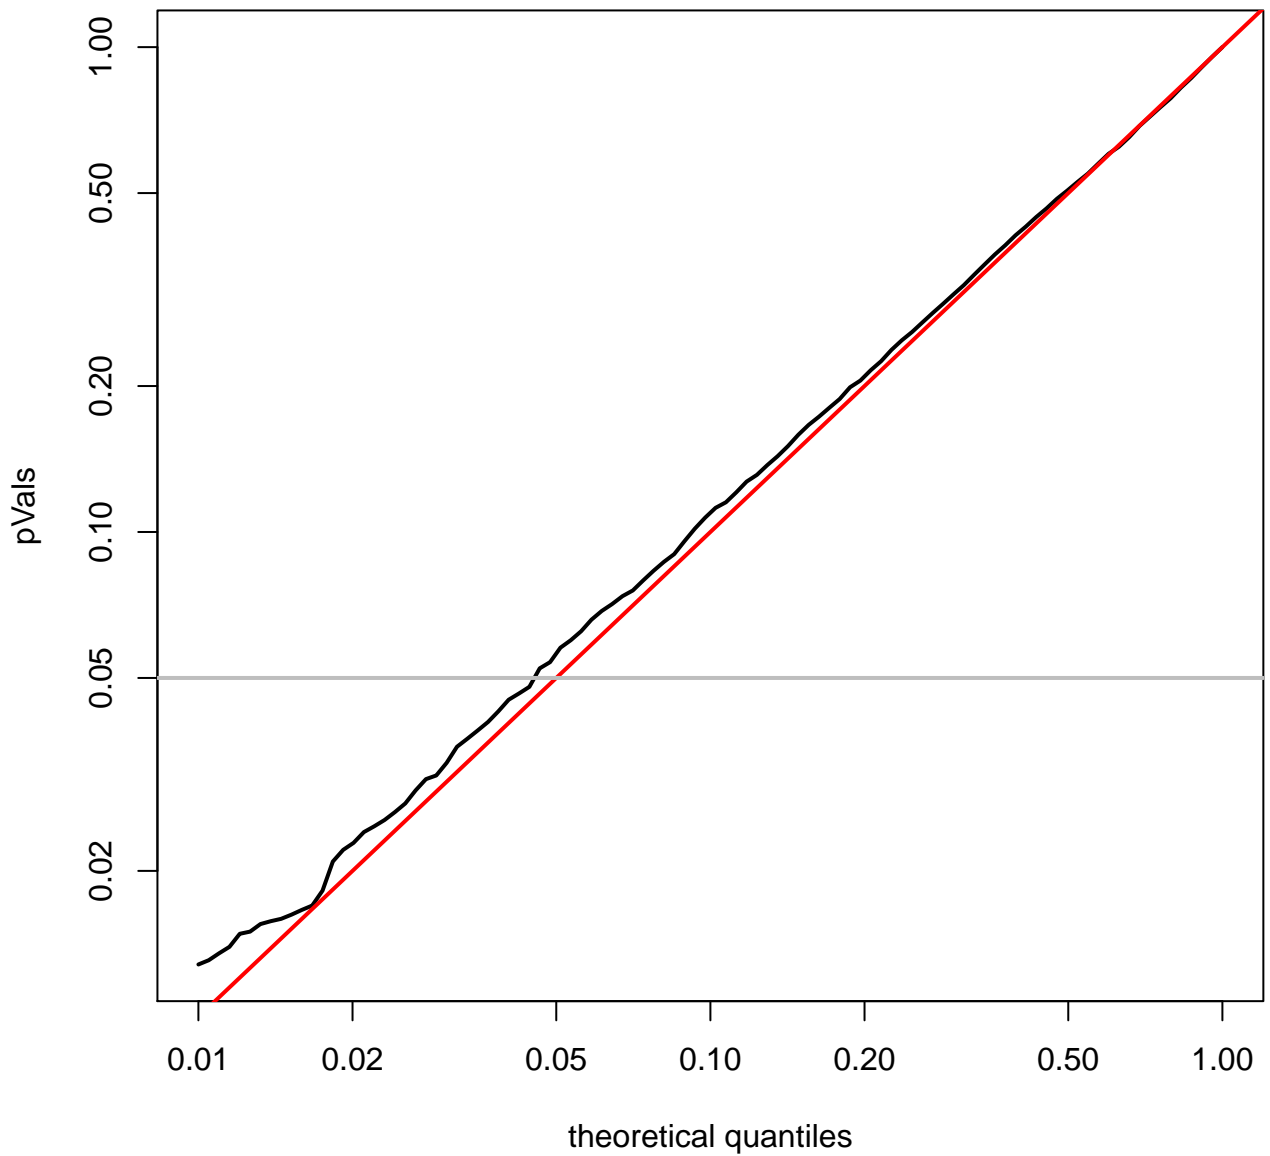

# Cumulative p-value distribution for OV

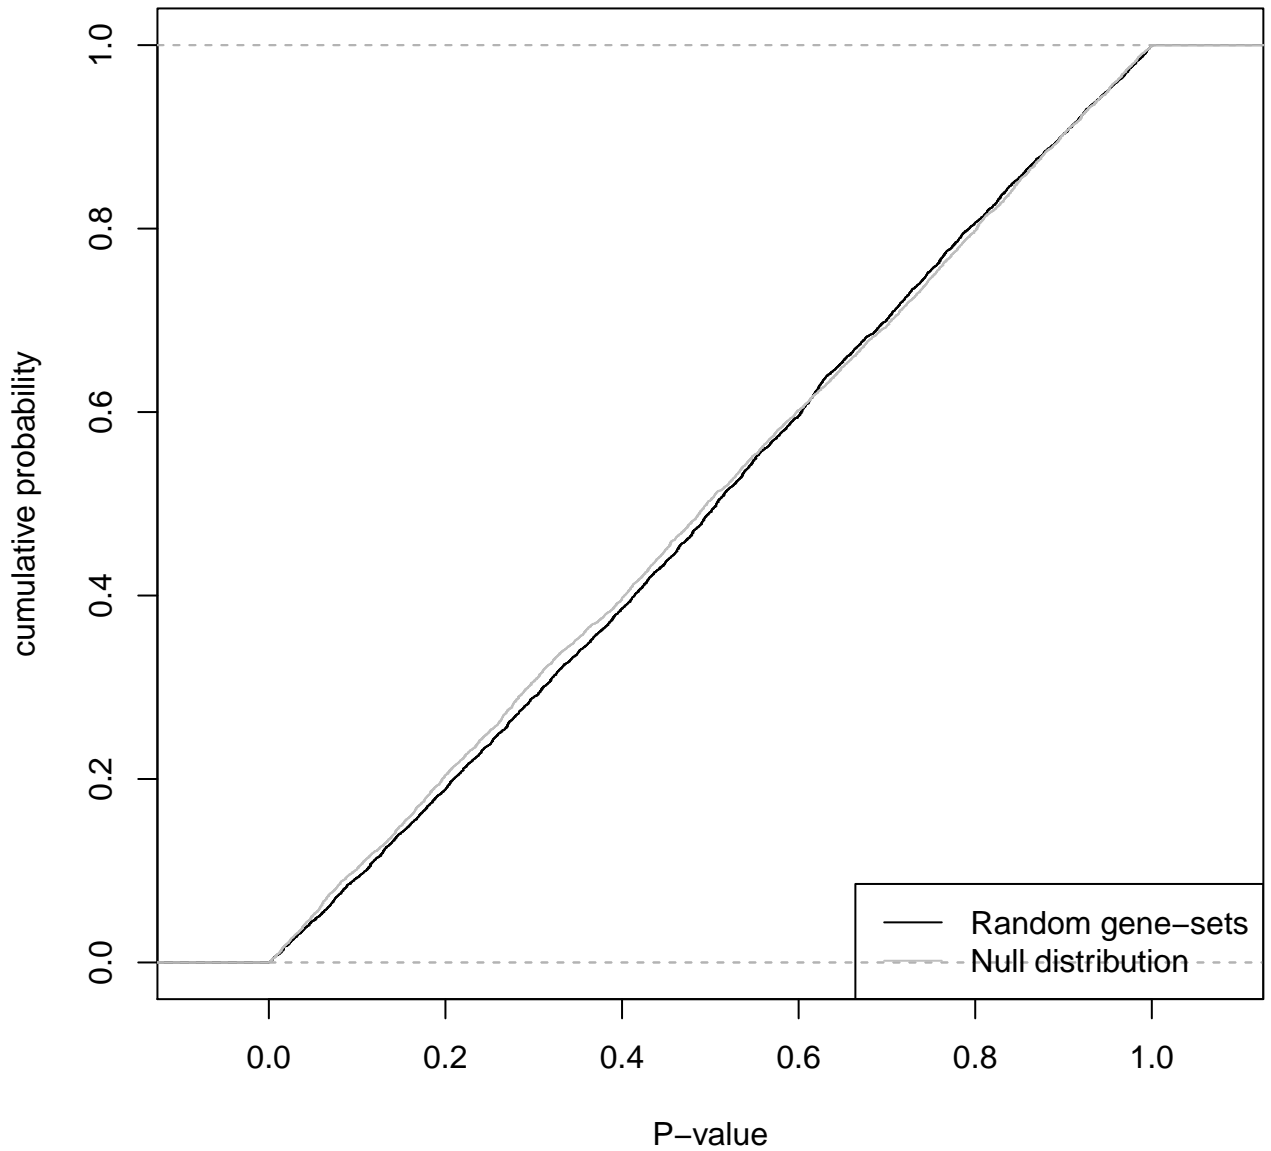

# Histogram for pVals for PAAD

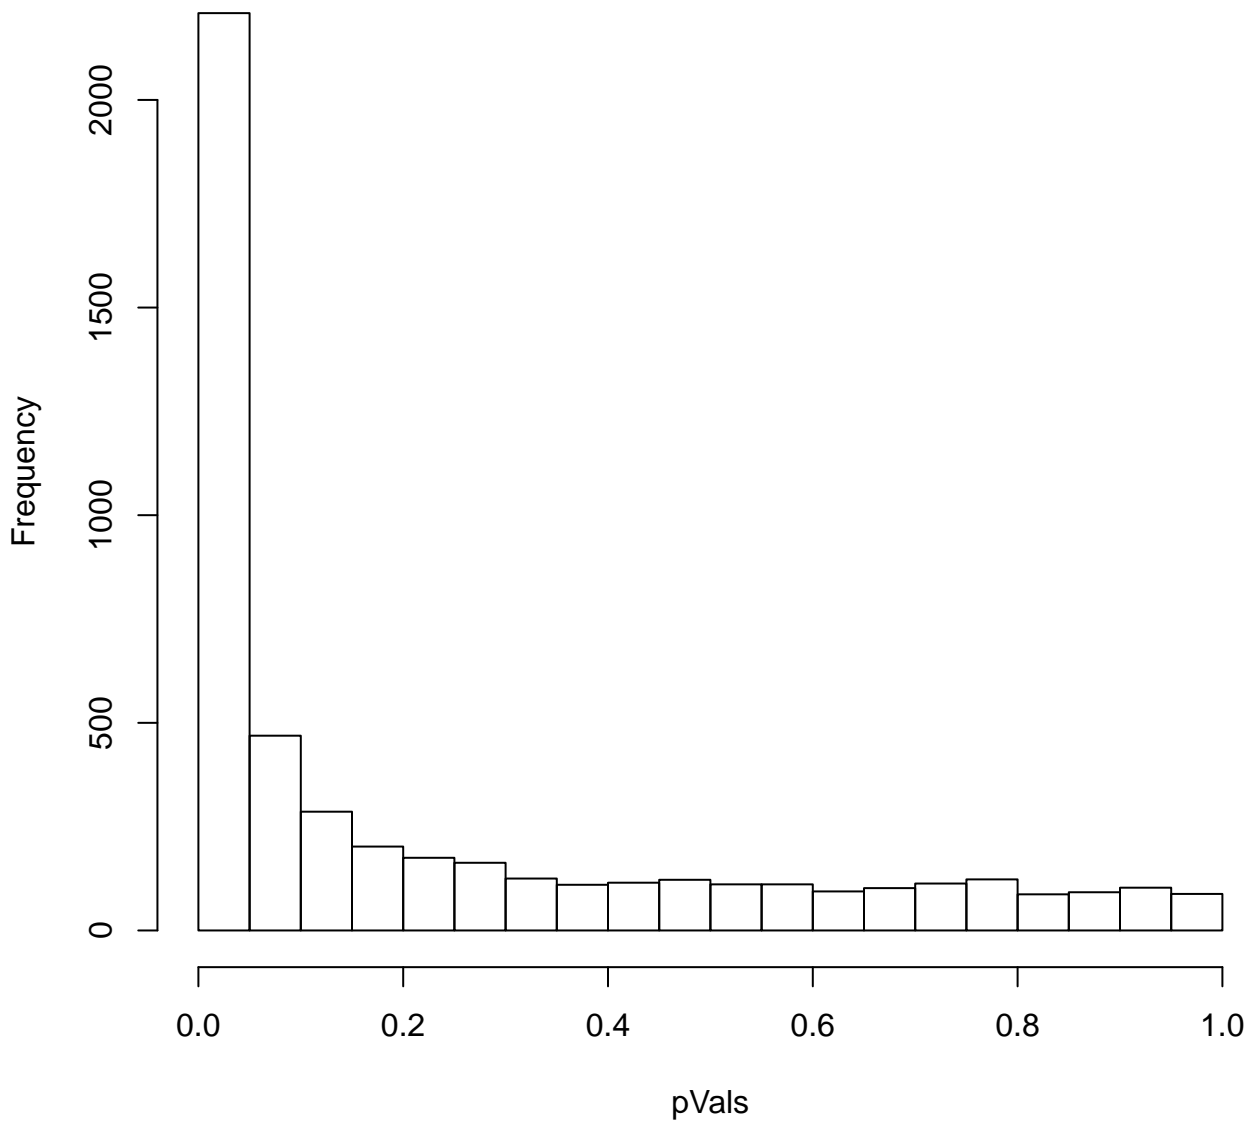

quantile plot for PAAD

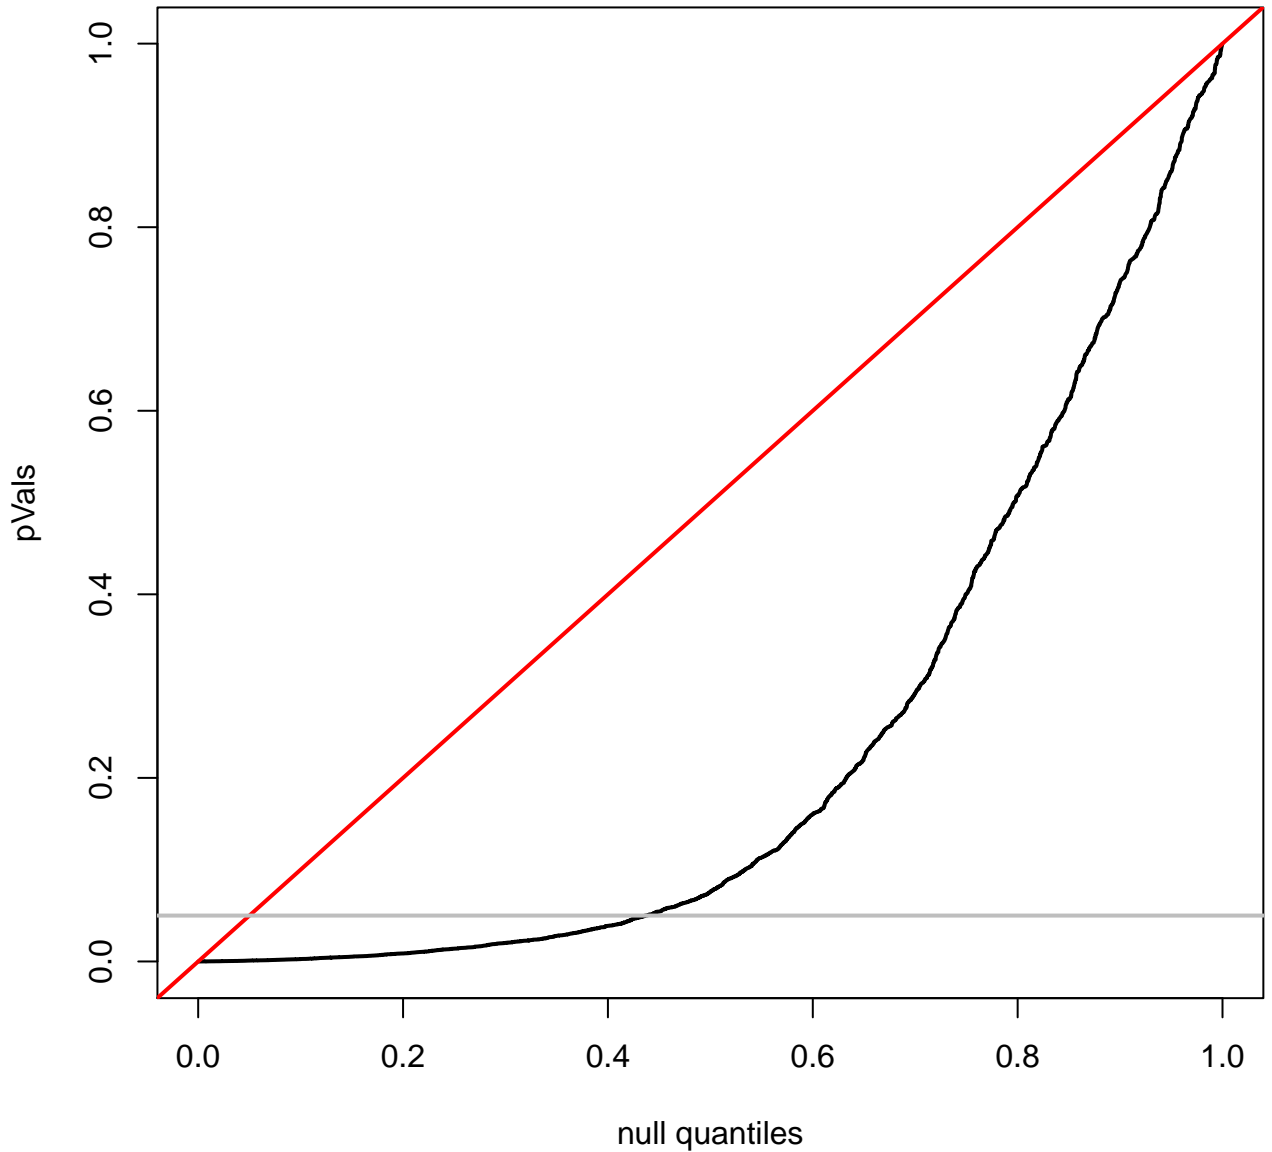

quantile plot for PAAD  
(log-scale)

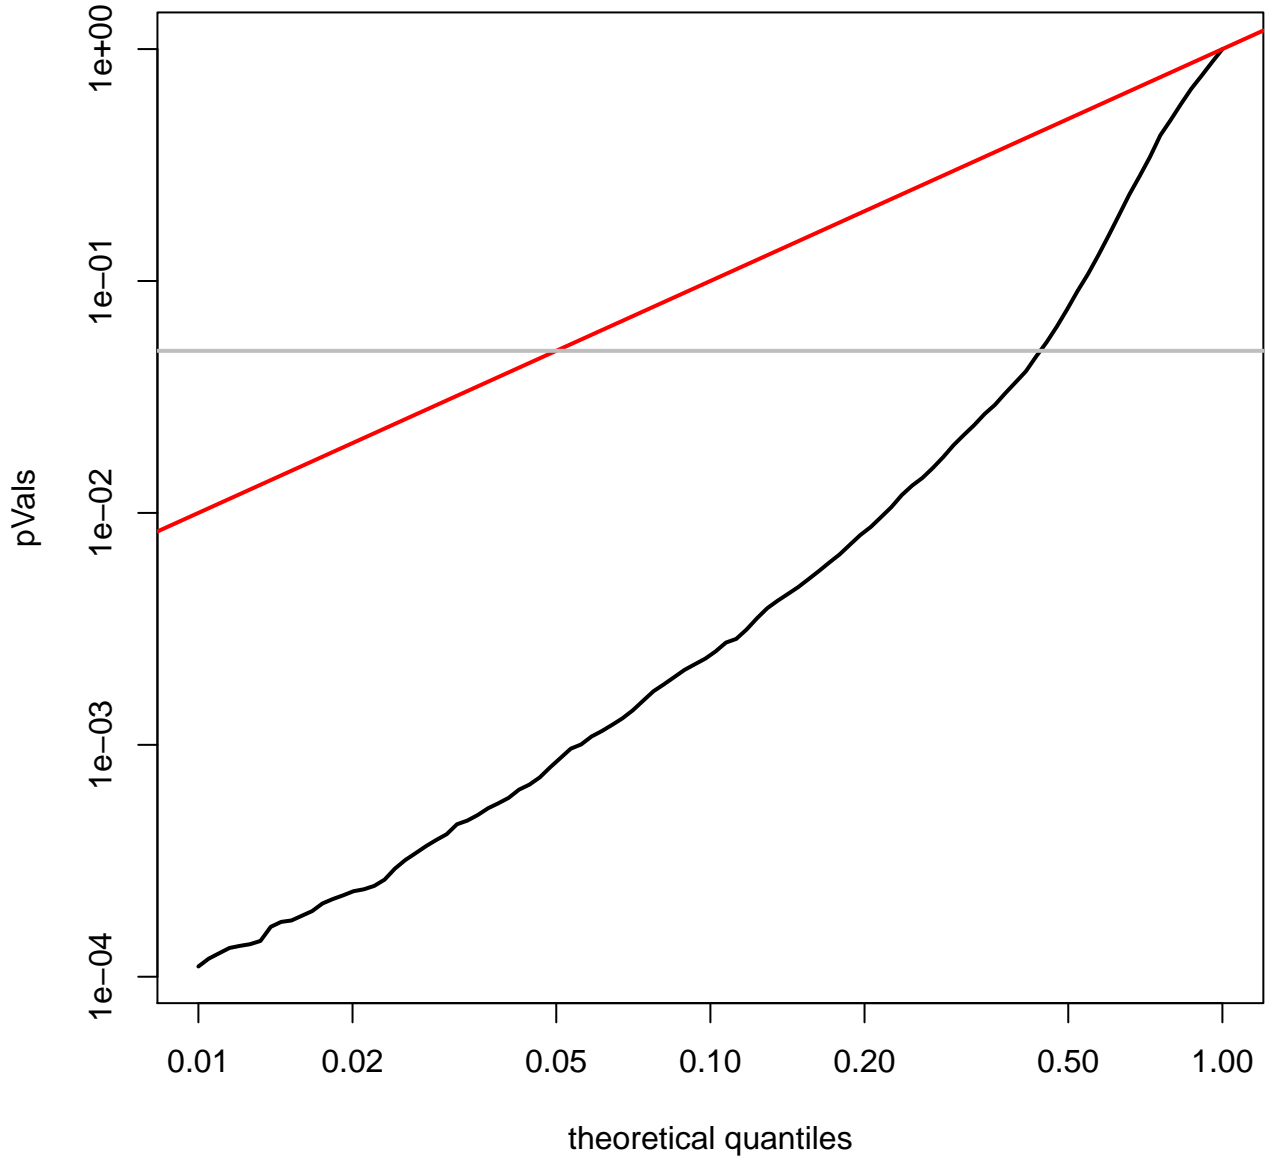

# Cumulative p-value distribution for PAAD

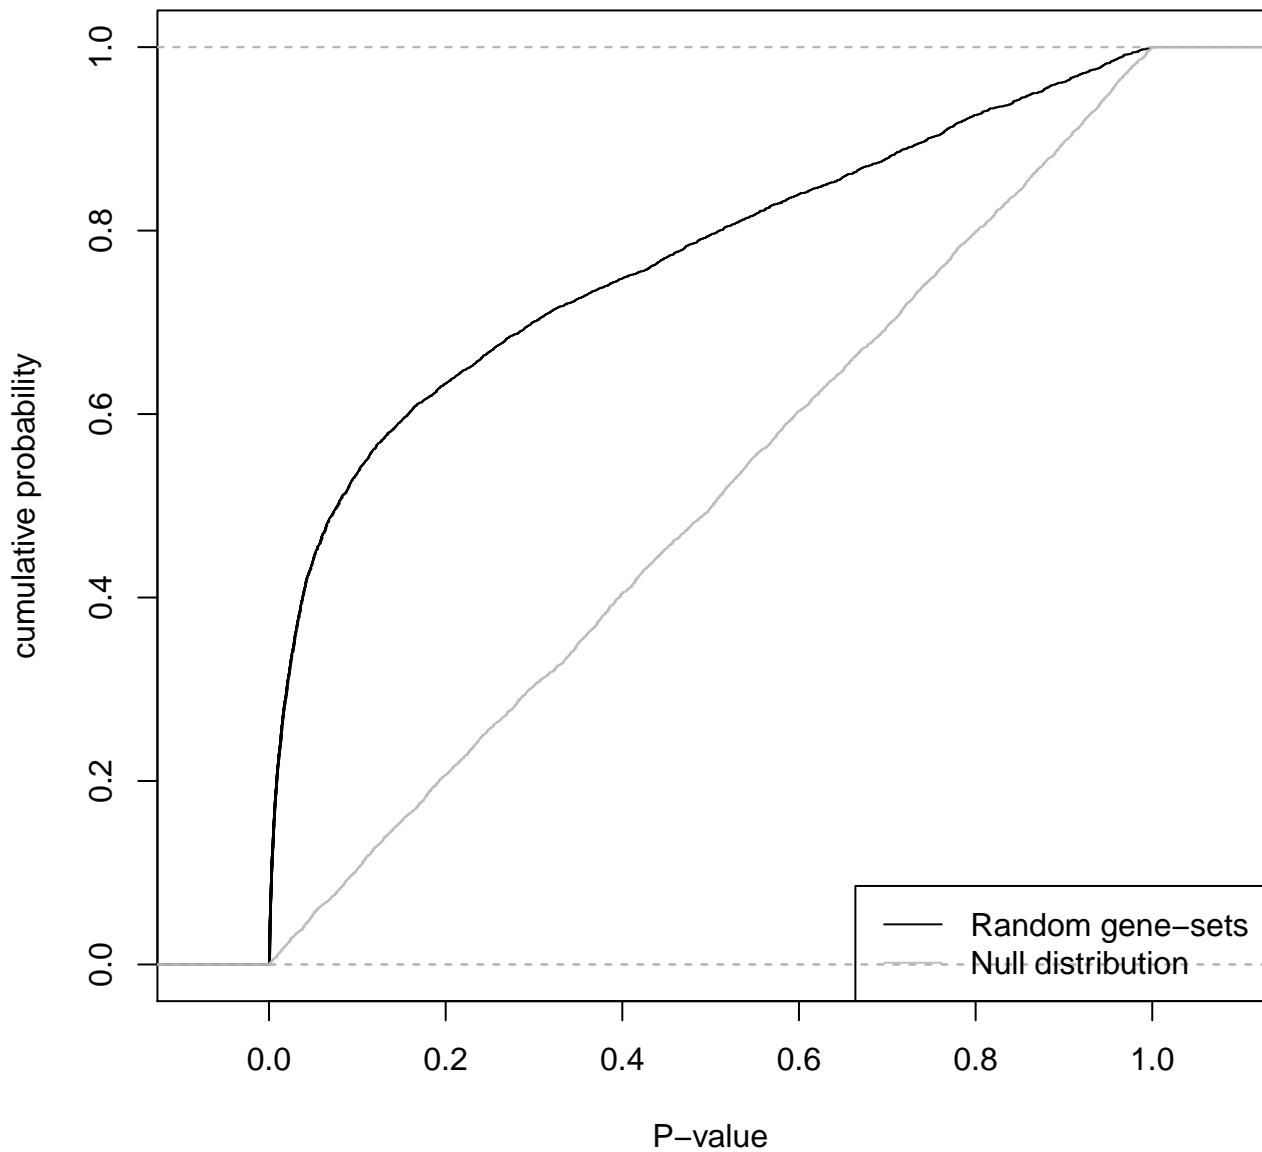



# Histogram for pVals for PCPG

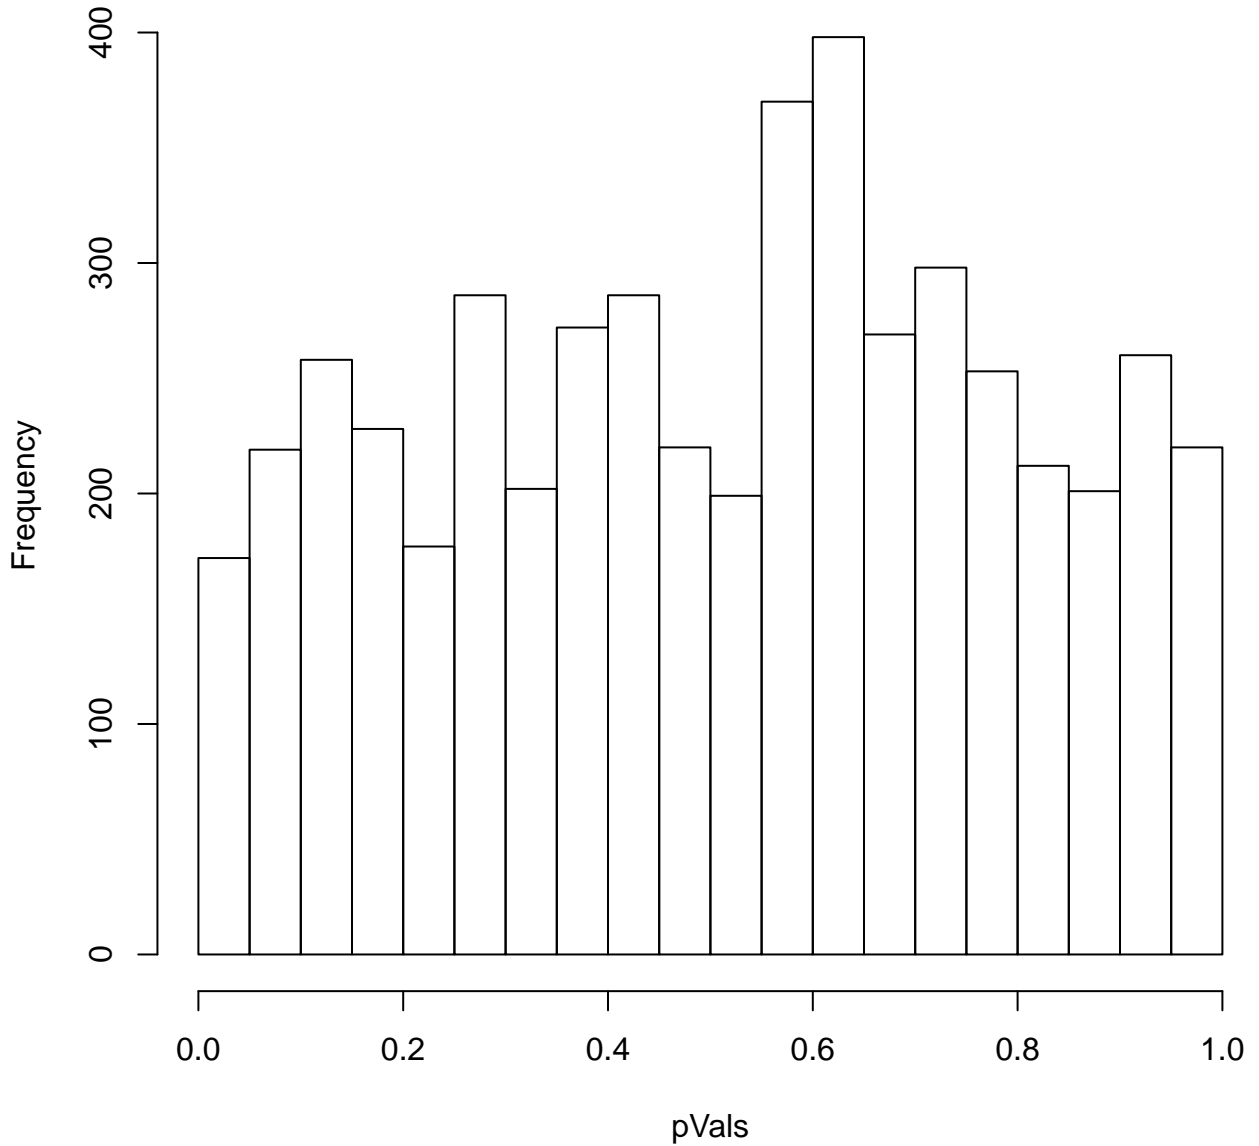

quantile plot for PCPG

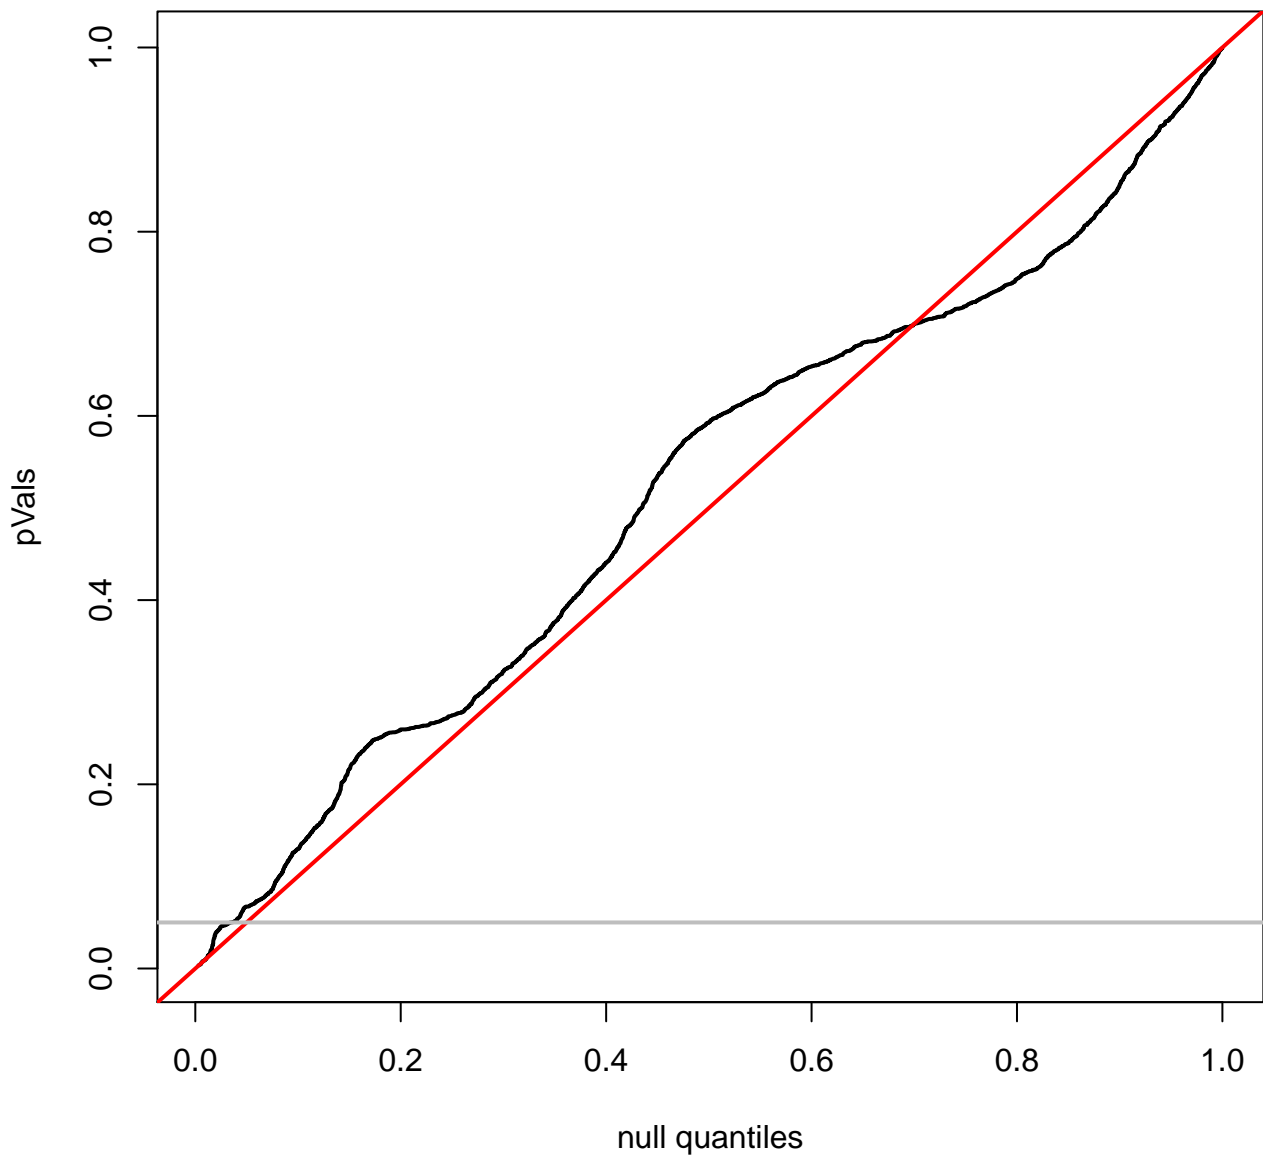

quantile plot for PCPG  
(log-scale)

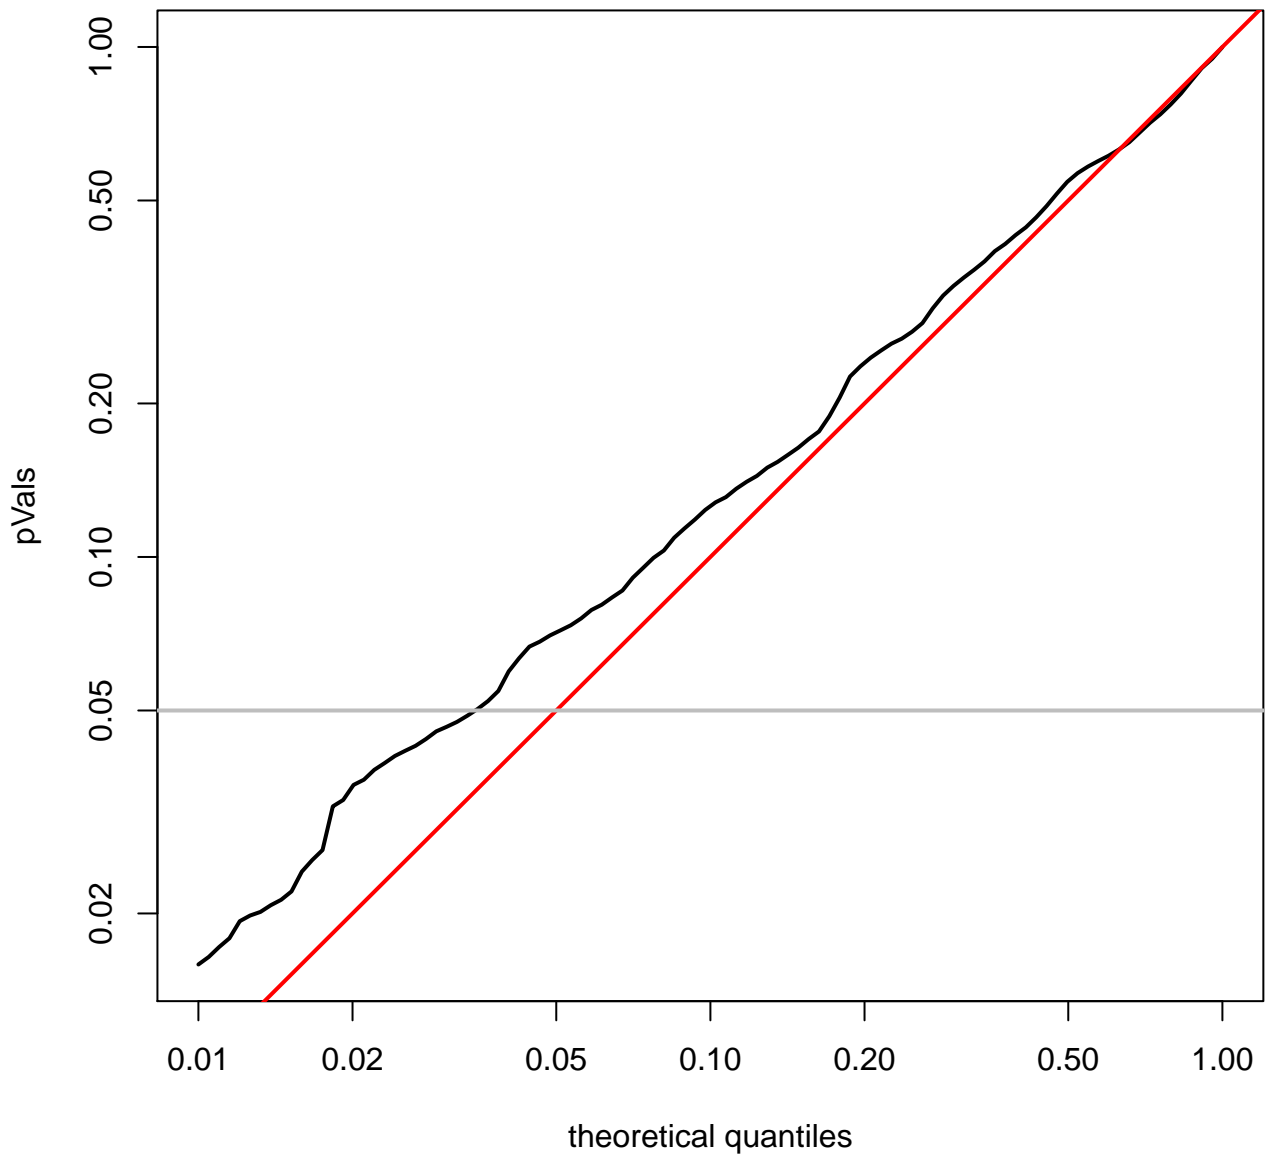

# Cumulative p-value distribution for PCPG

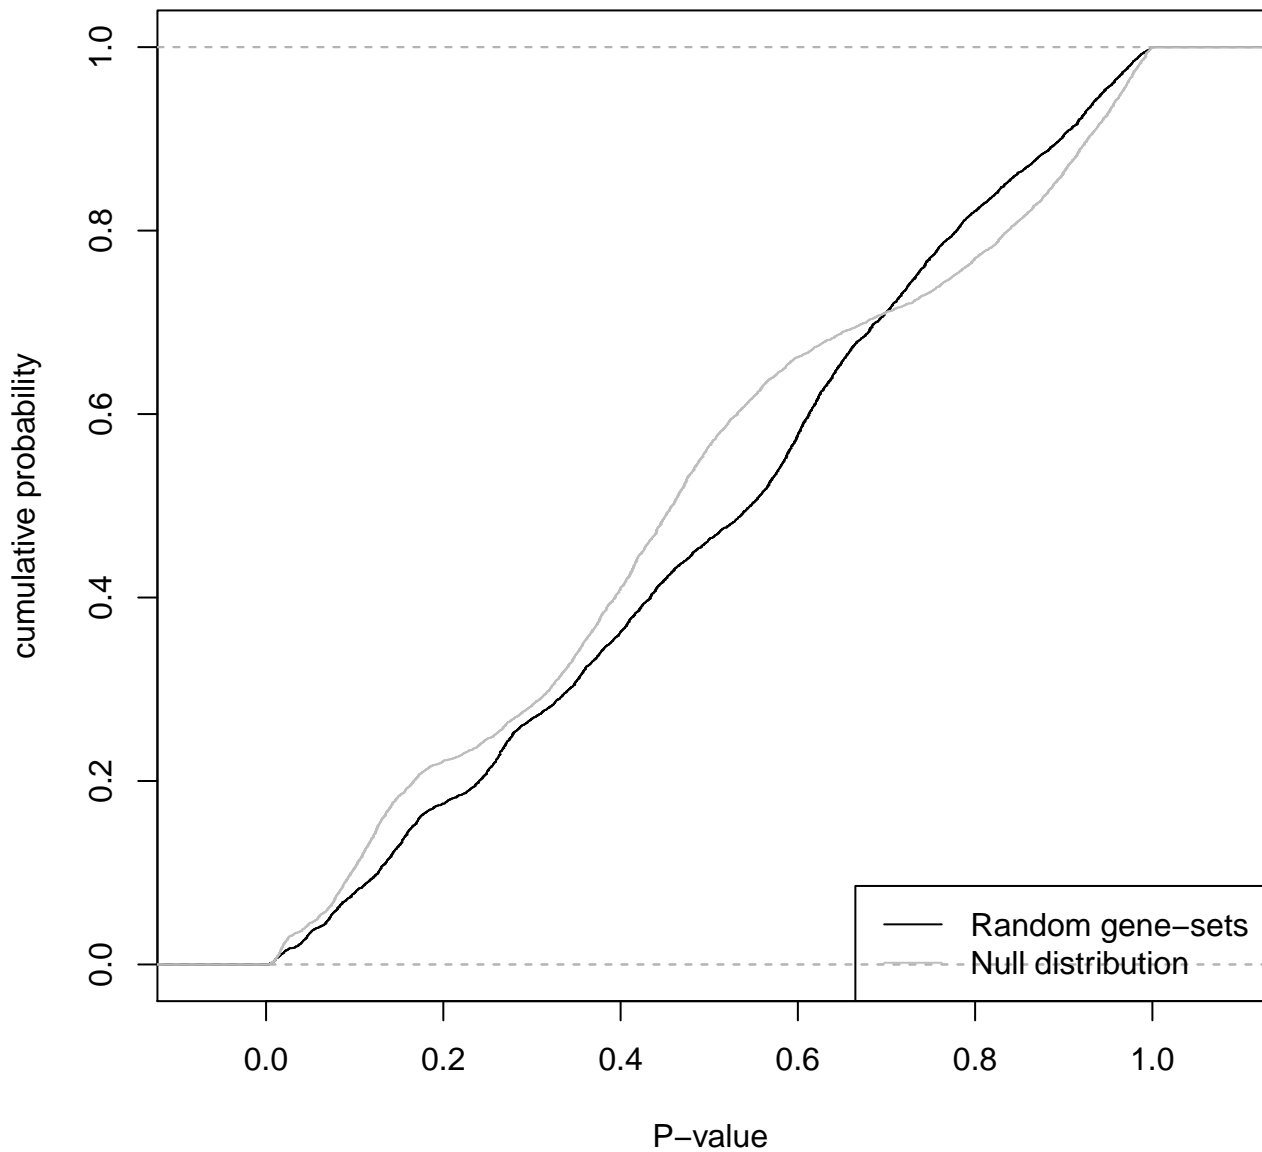

# Histogram for pVals for PRAD

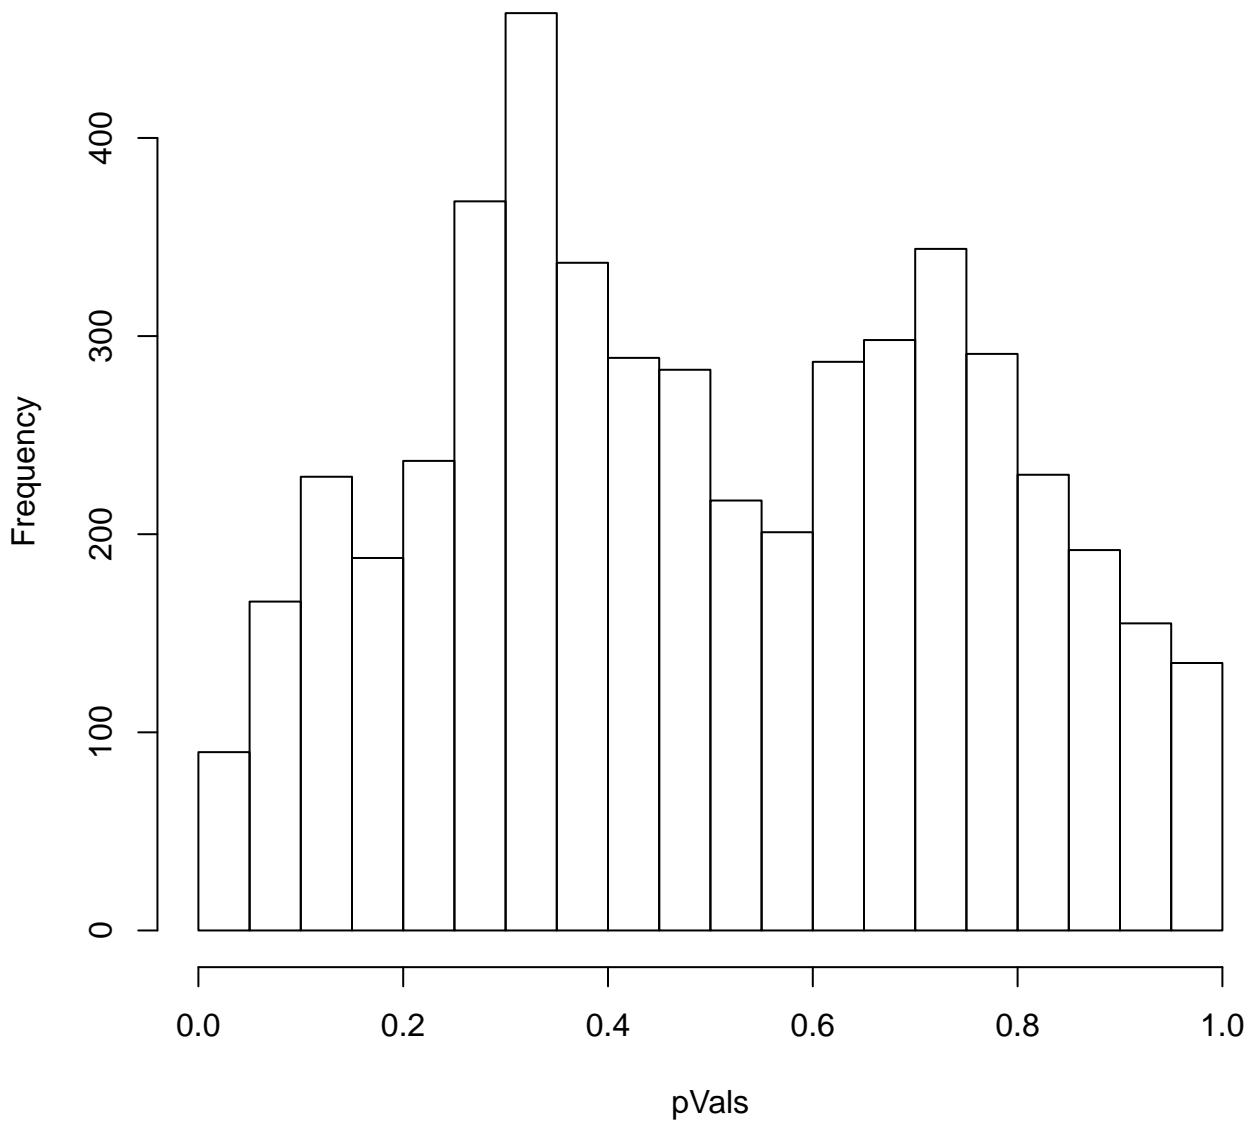

quantile plot for PRAD

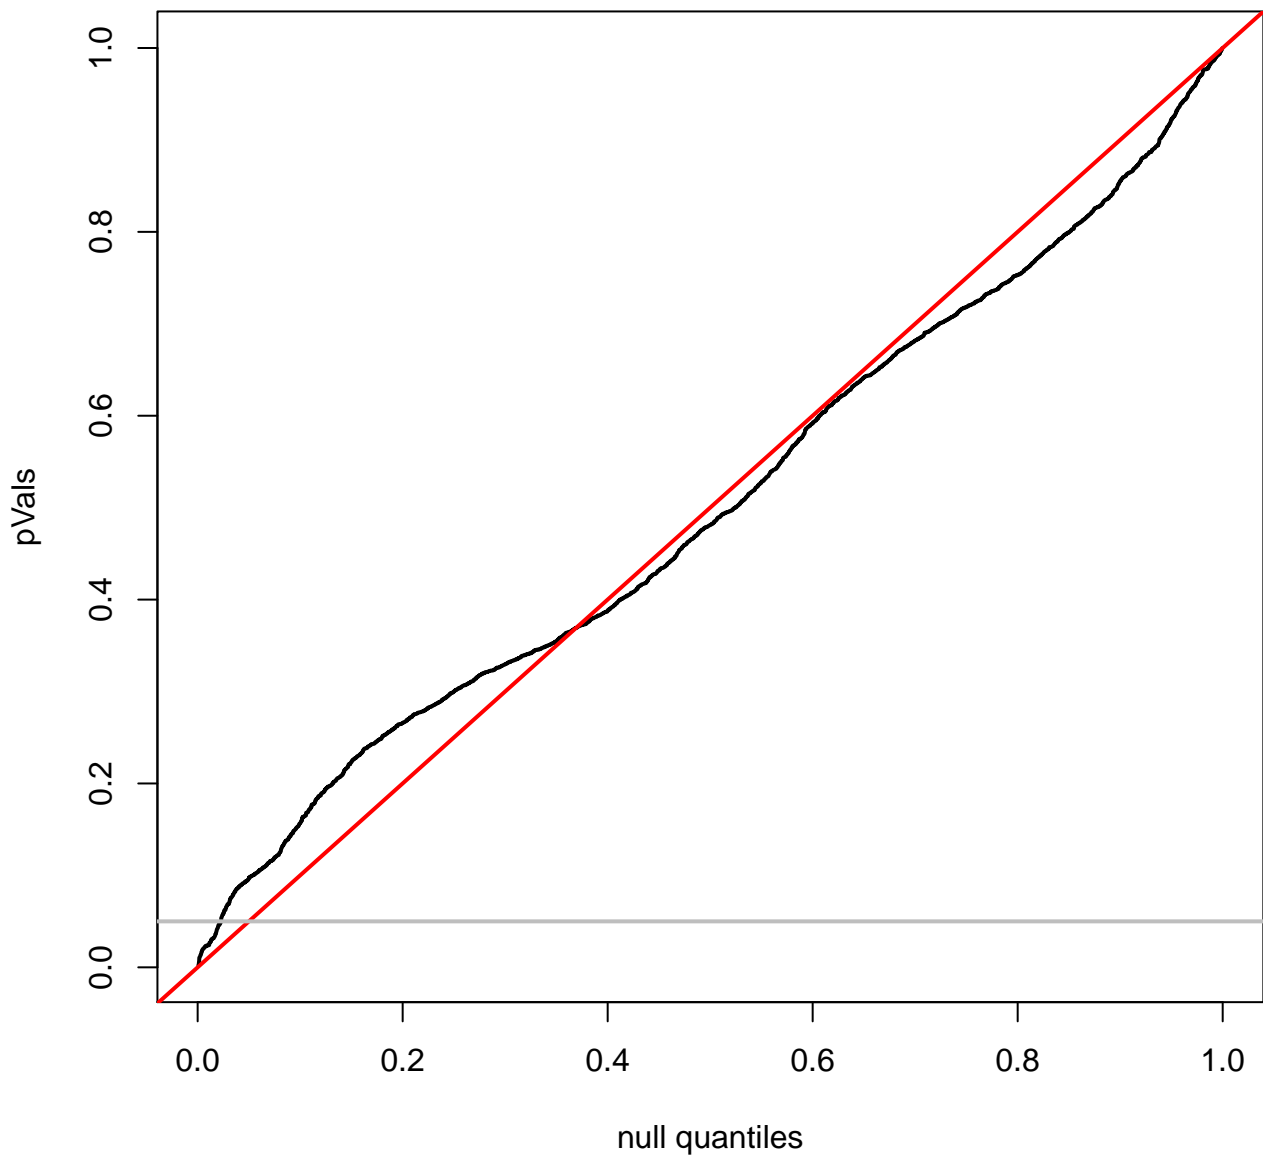

quantile plot for PRAD  
(log-scale)

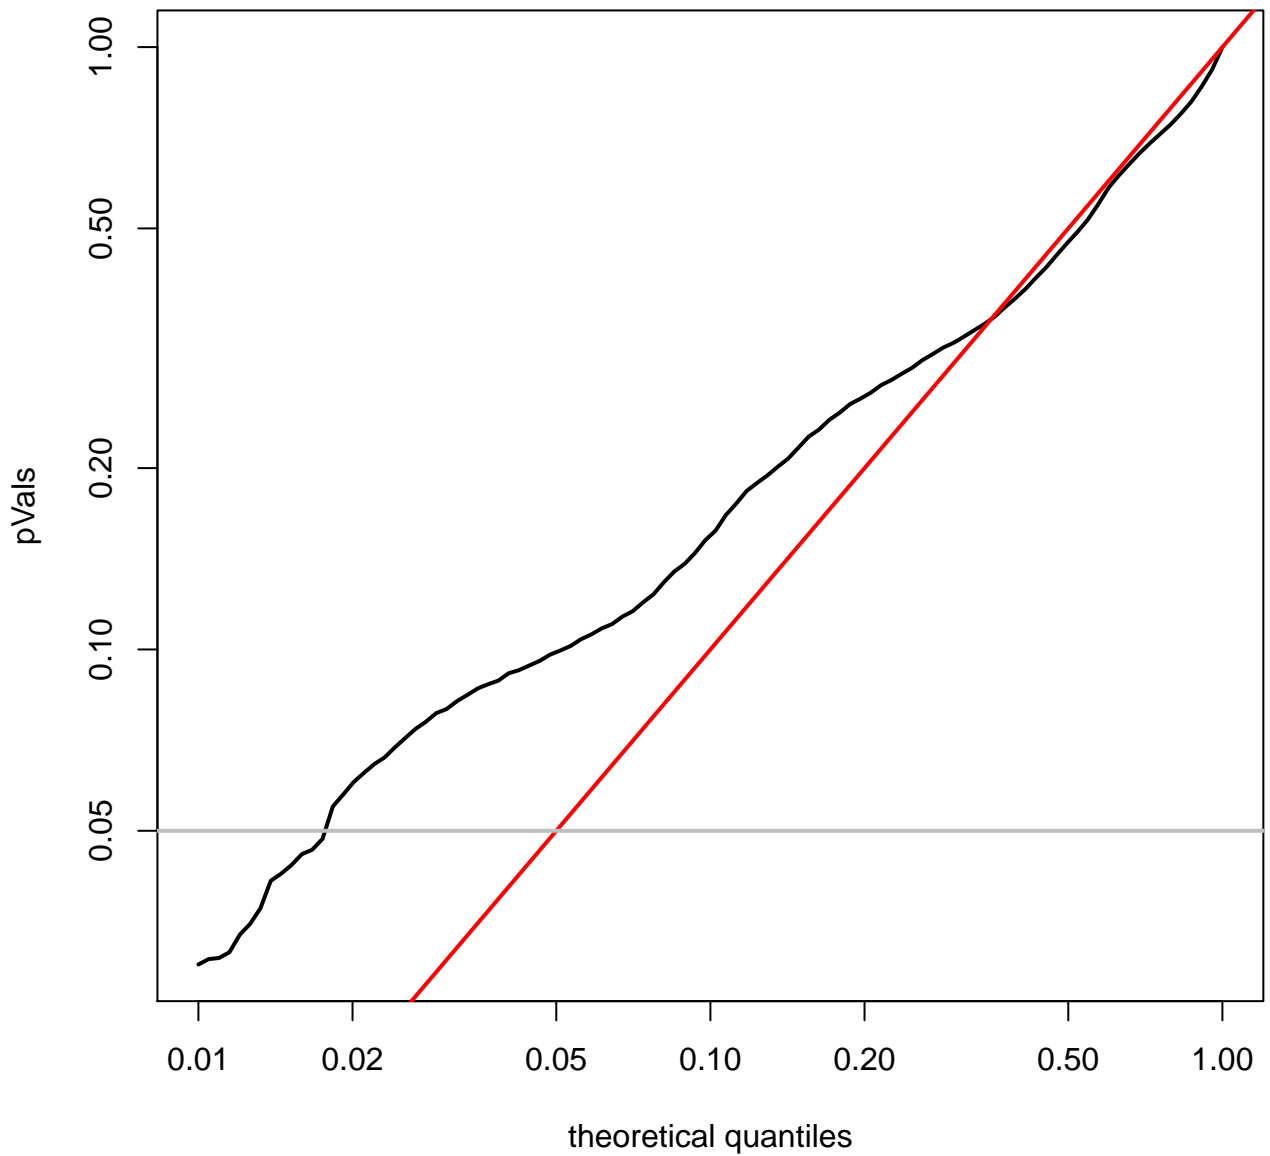

# Cumulative p-value distribution for PRAD

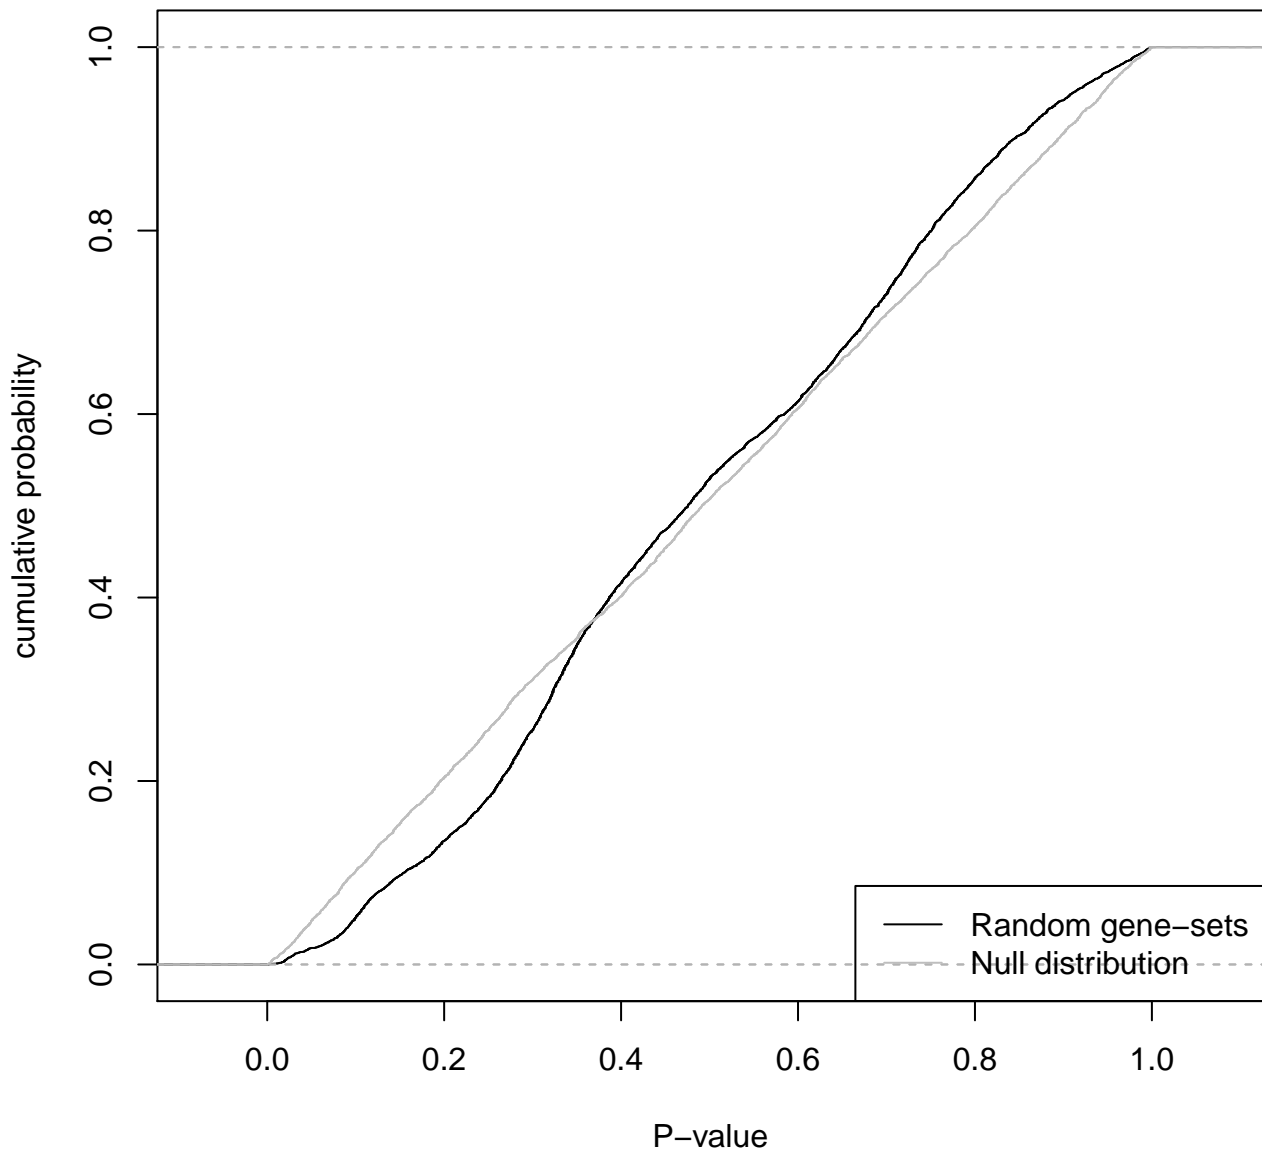



# Histogram for pVals for READ

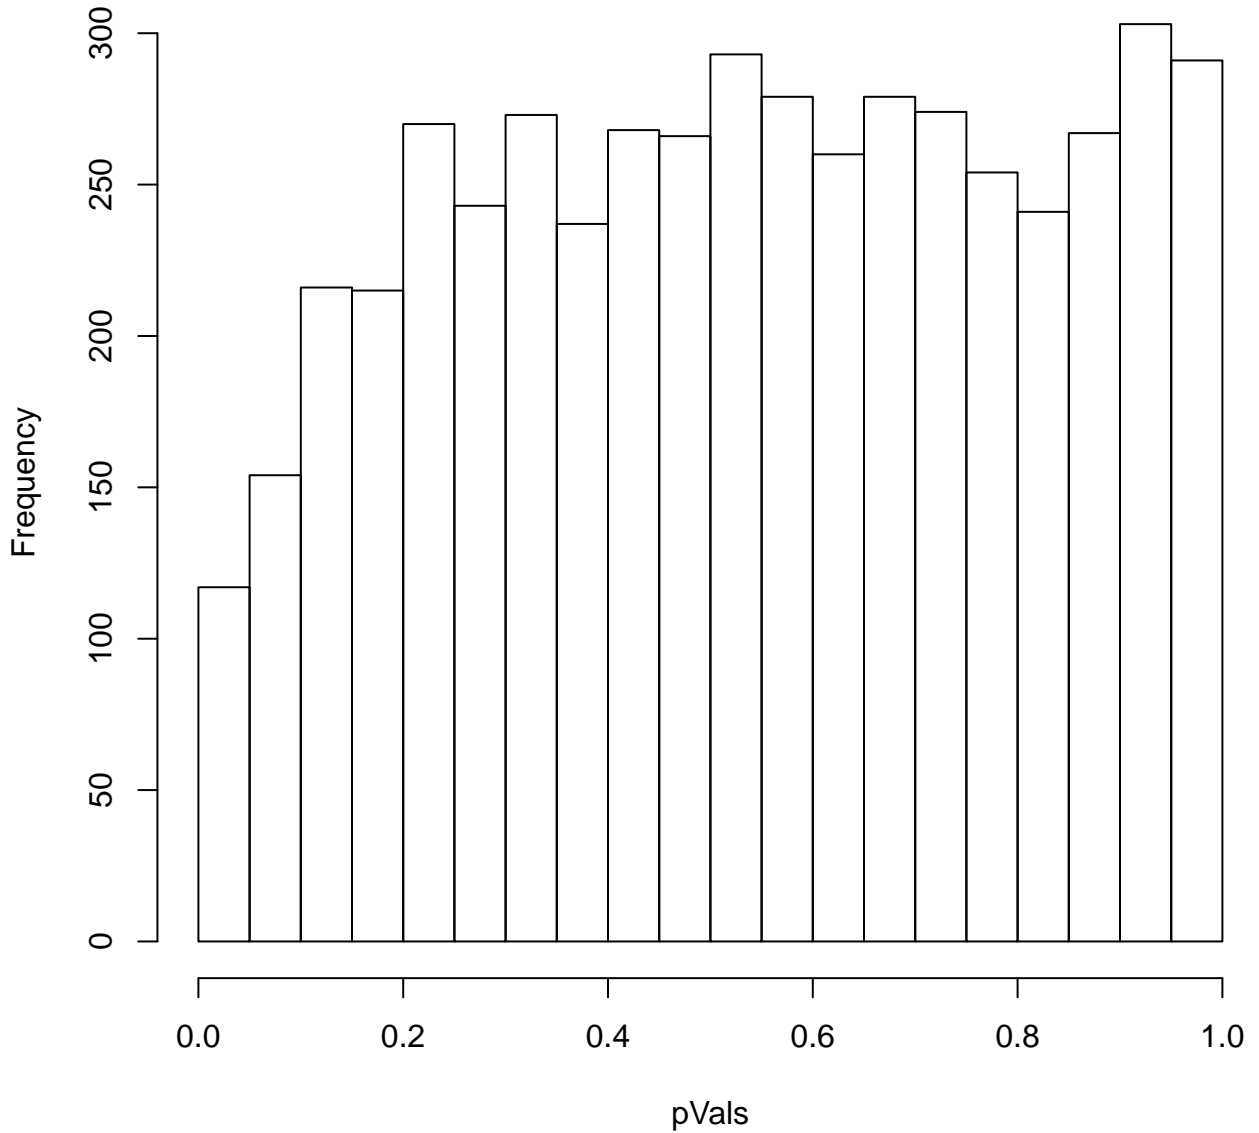

quantile plot for READ

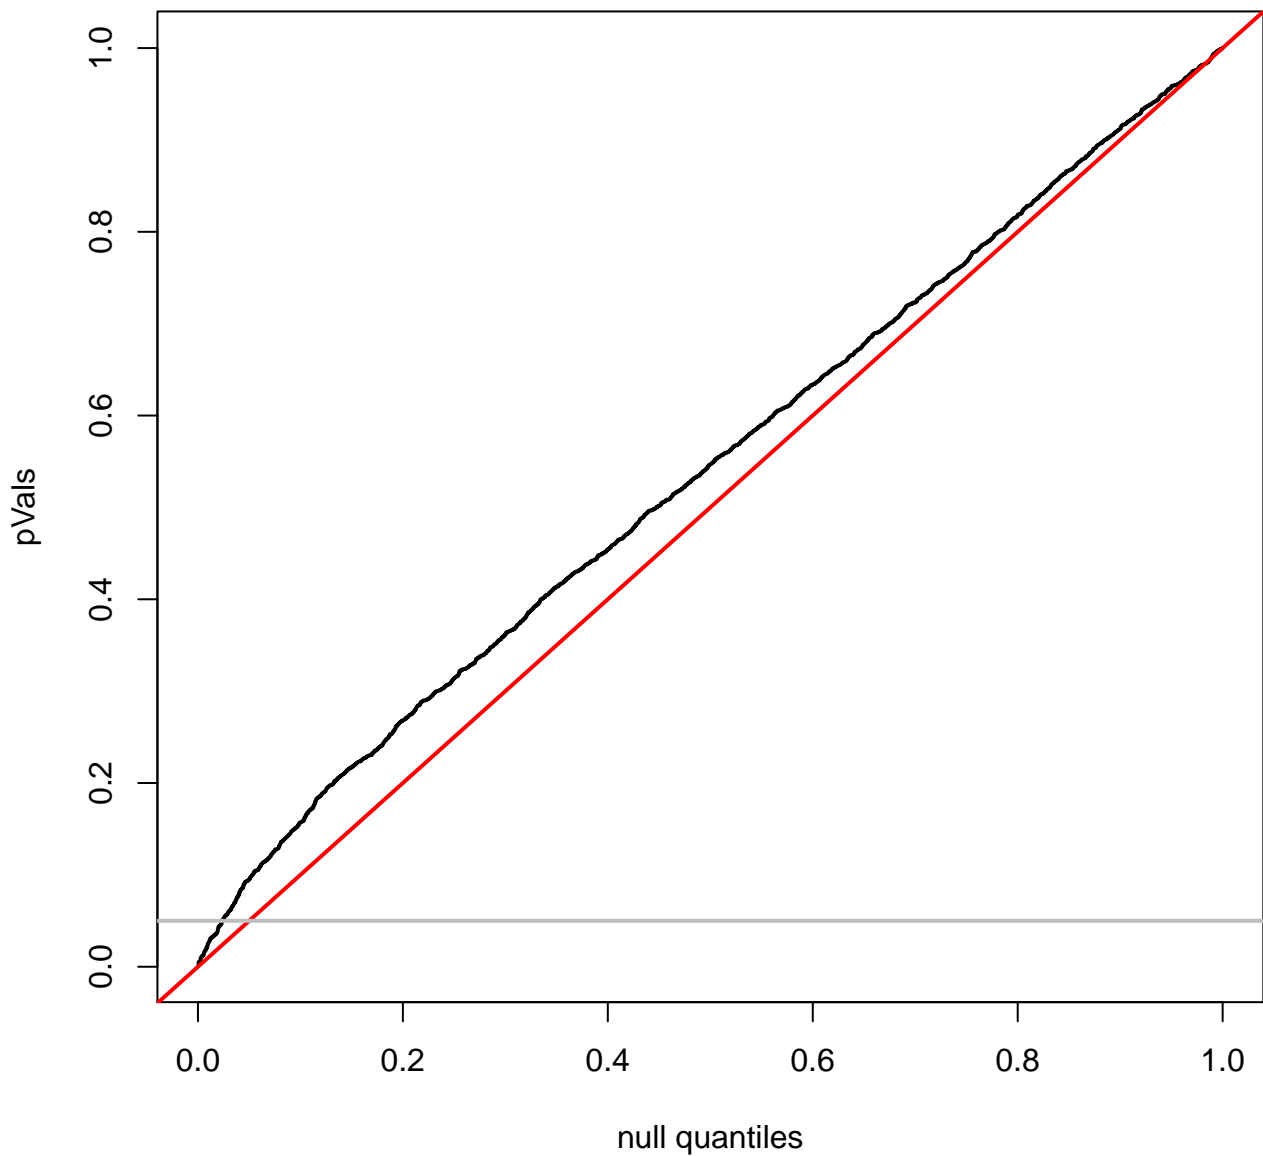

quantile plot for READ  
(log-scale)

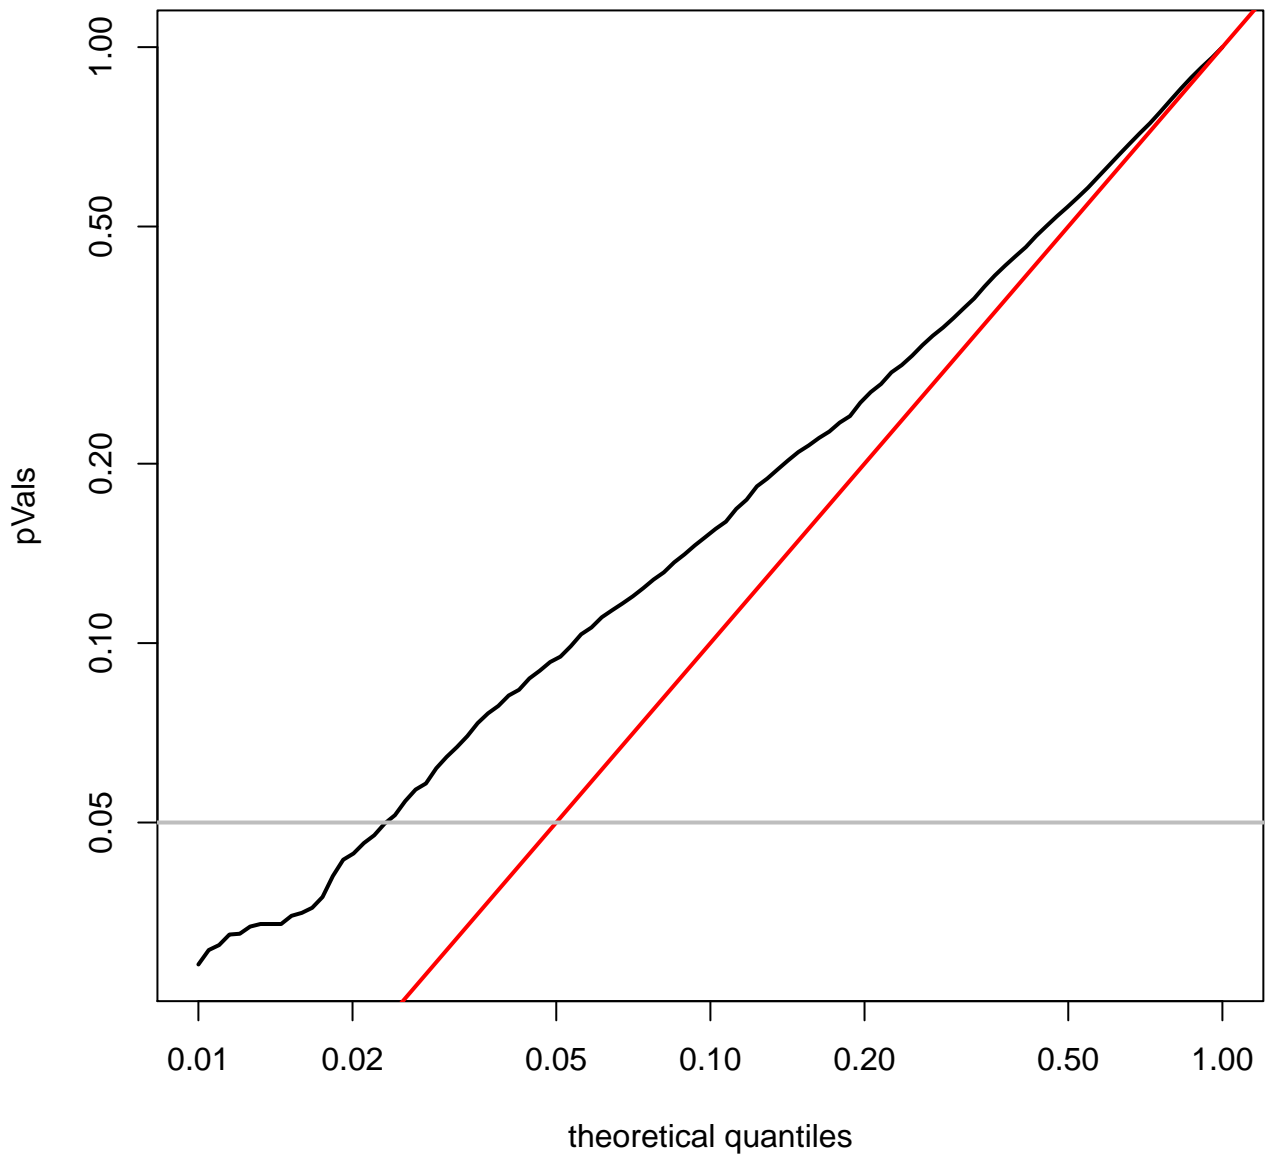

# Cumulative p-value distribution for READ

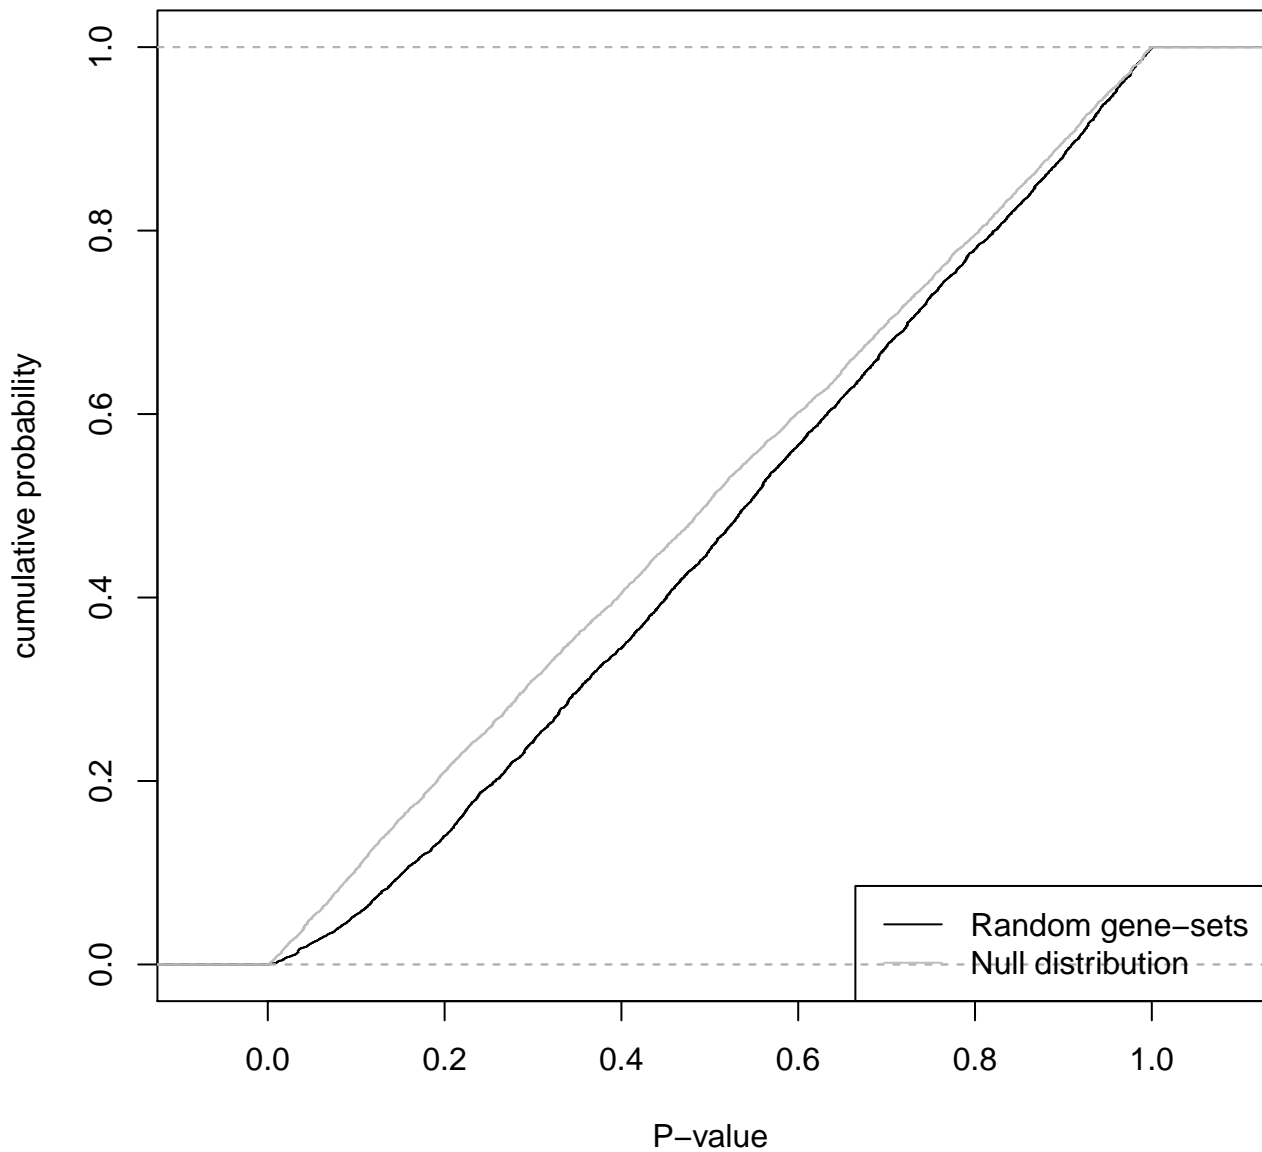

# Histogram for pVals for SKCM

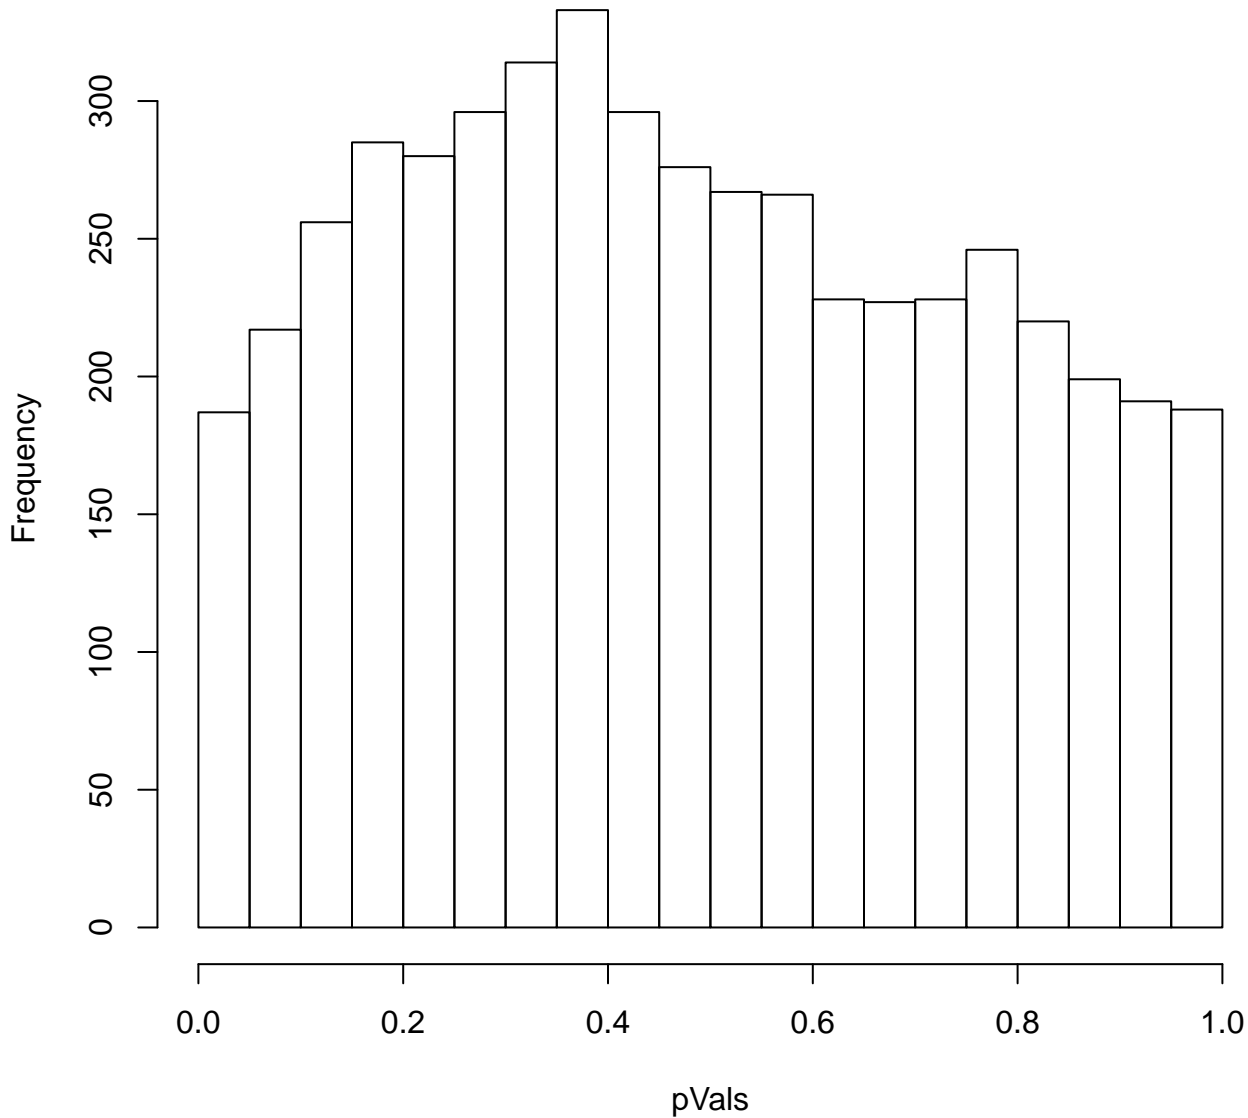

# quantile plot for SKCM

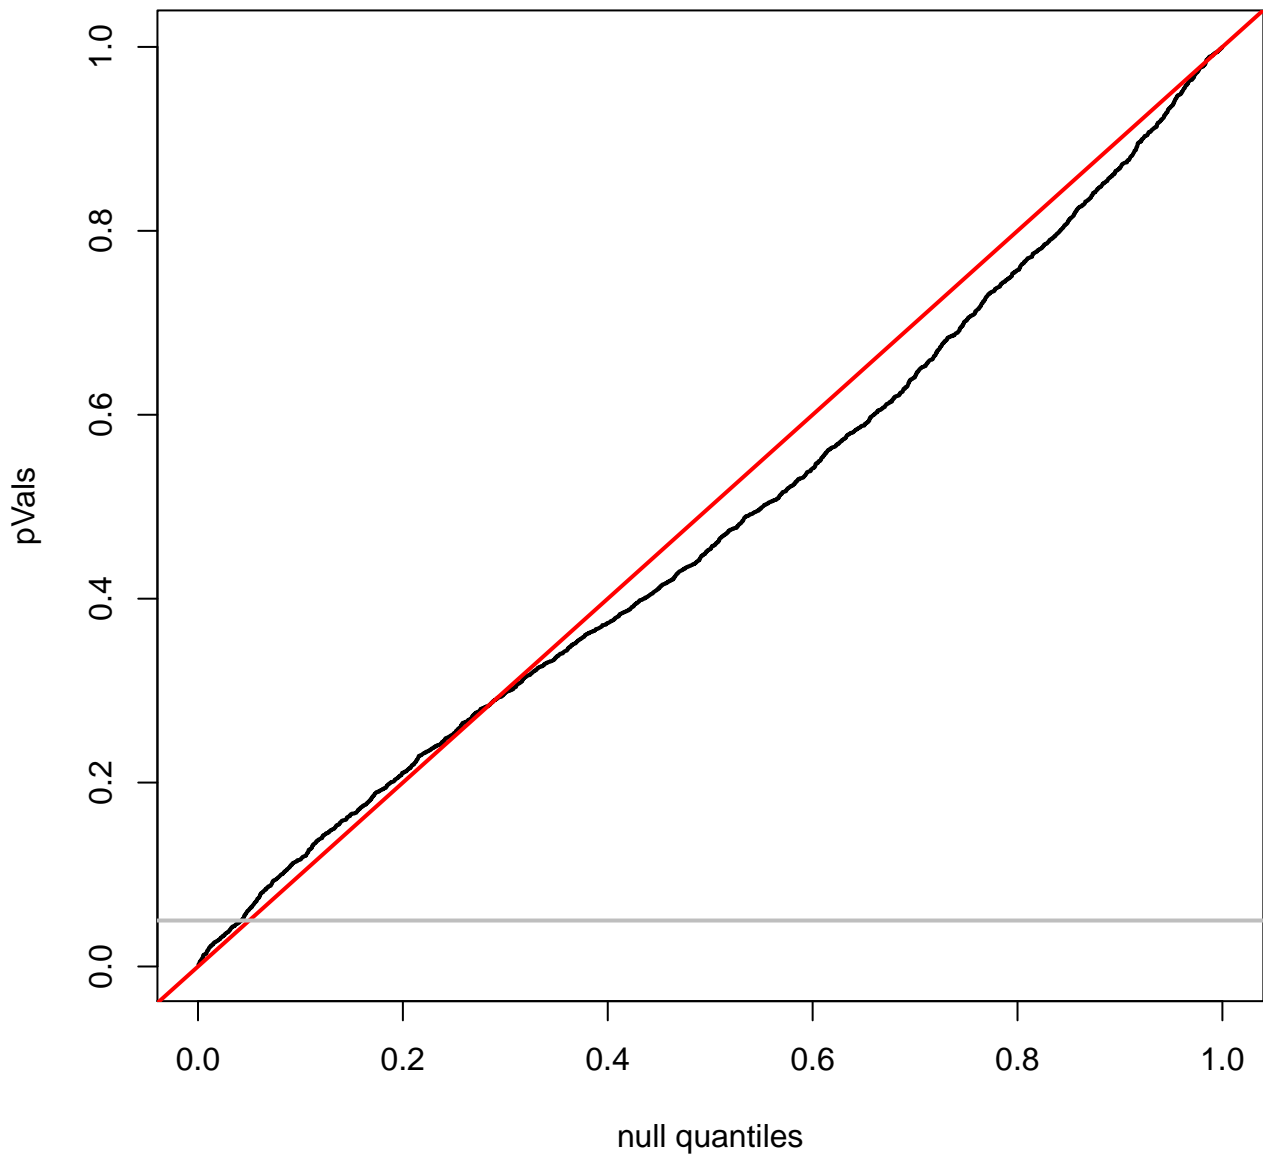

quantile plot for SKCM  
(log-scale)

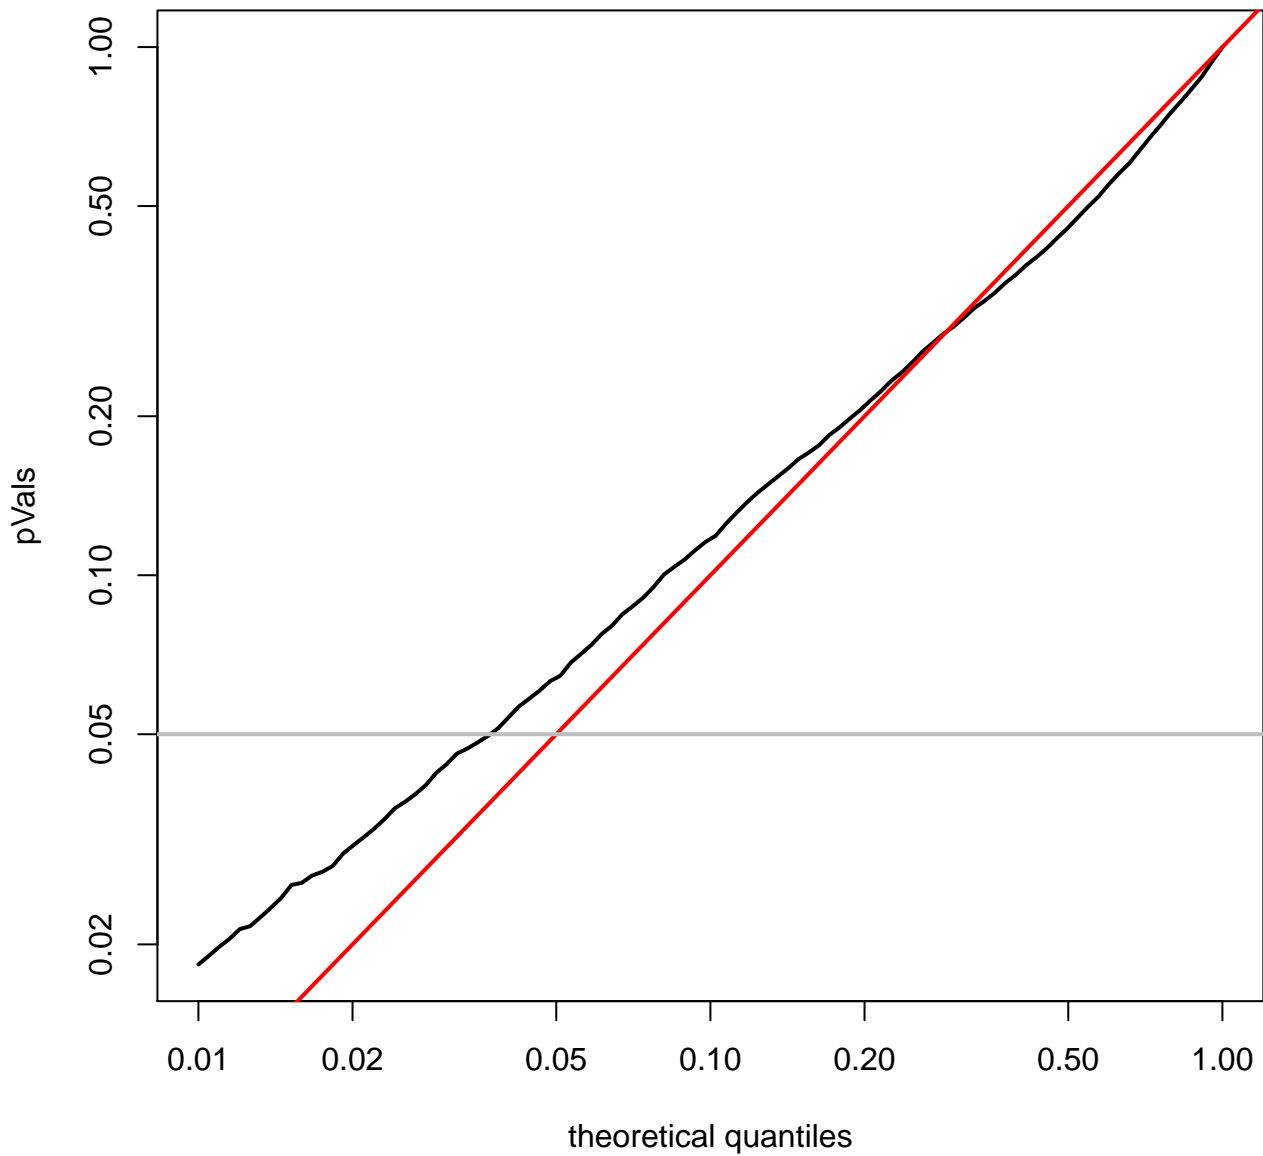

# Cumulative p-value distribution for SKCM

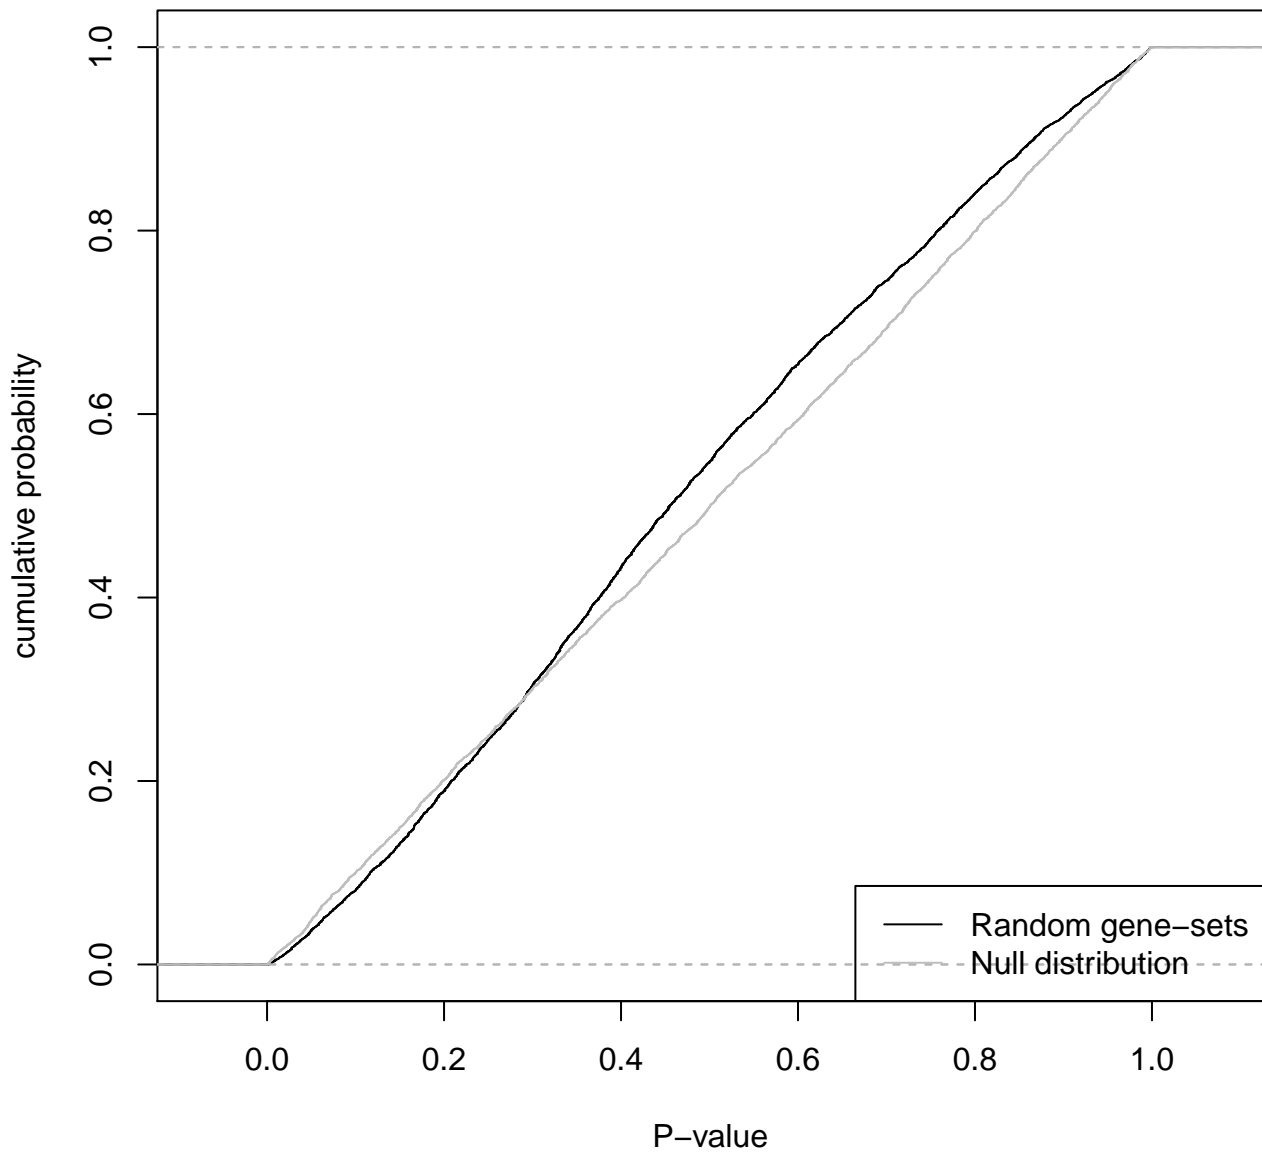



# Histogram for pVals for TGCT

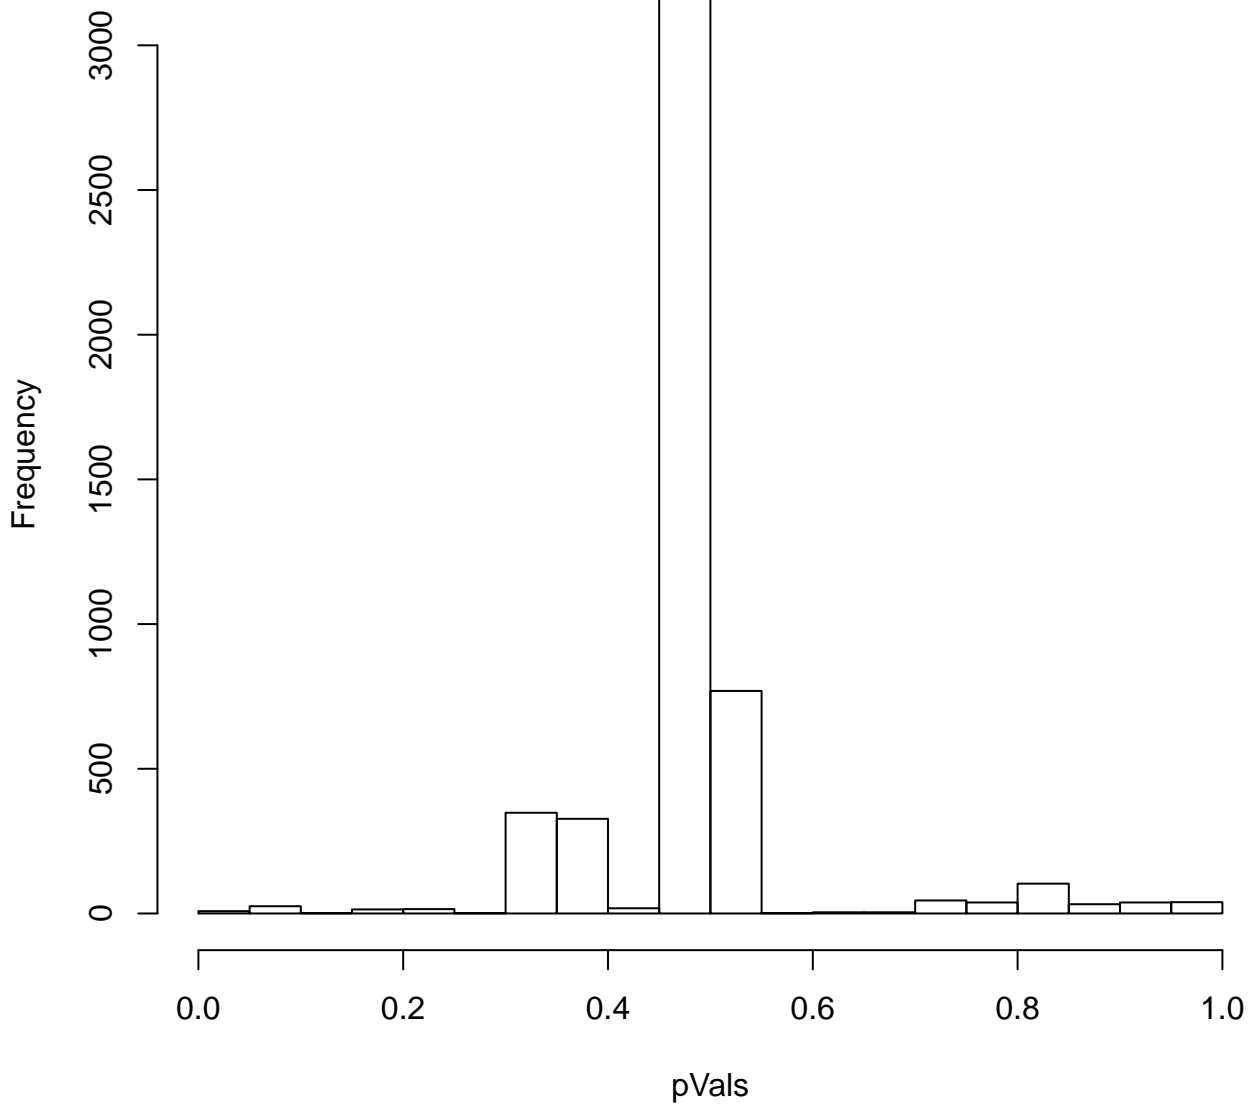

quantile plot for TGCT

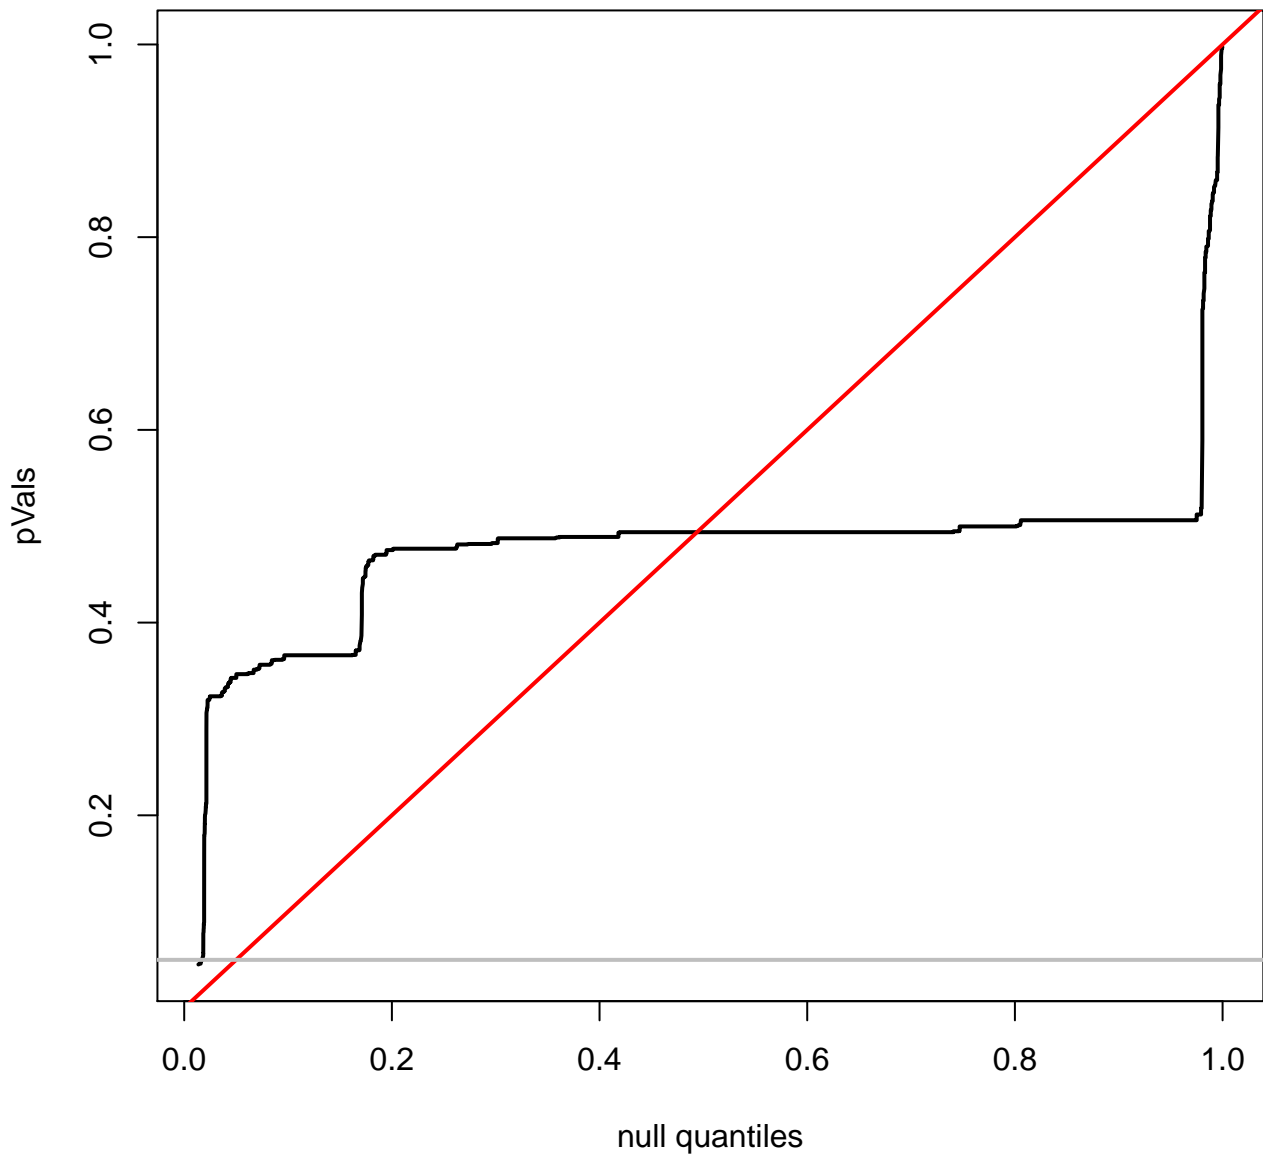

quantile plot for TGCT  
(log-scale)

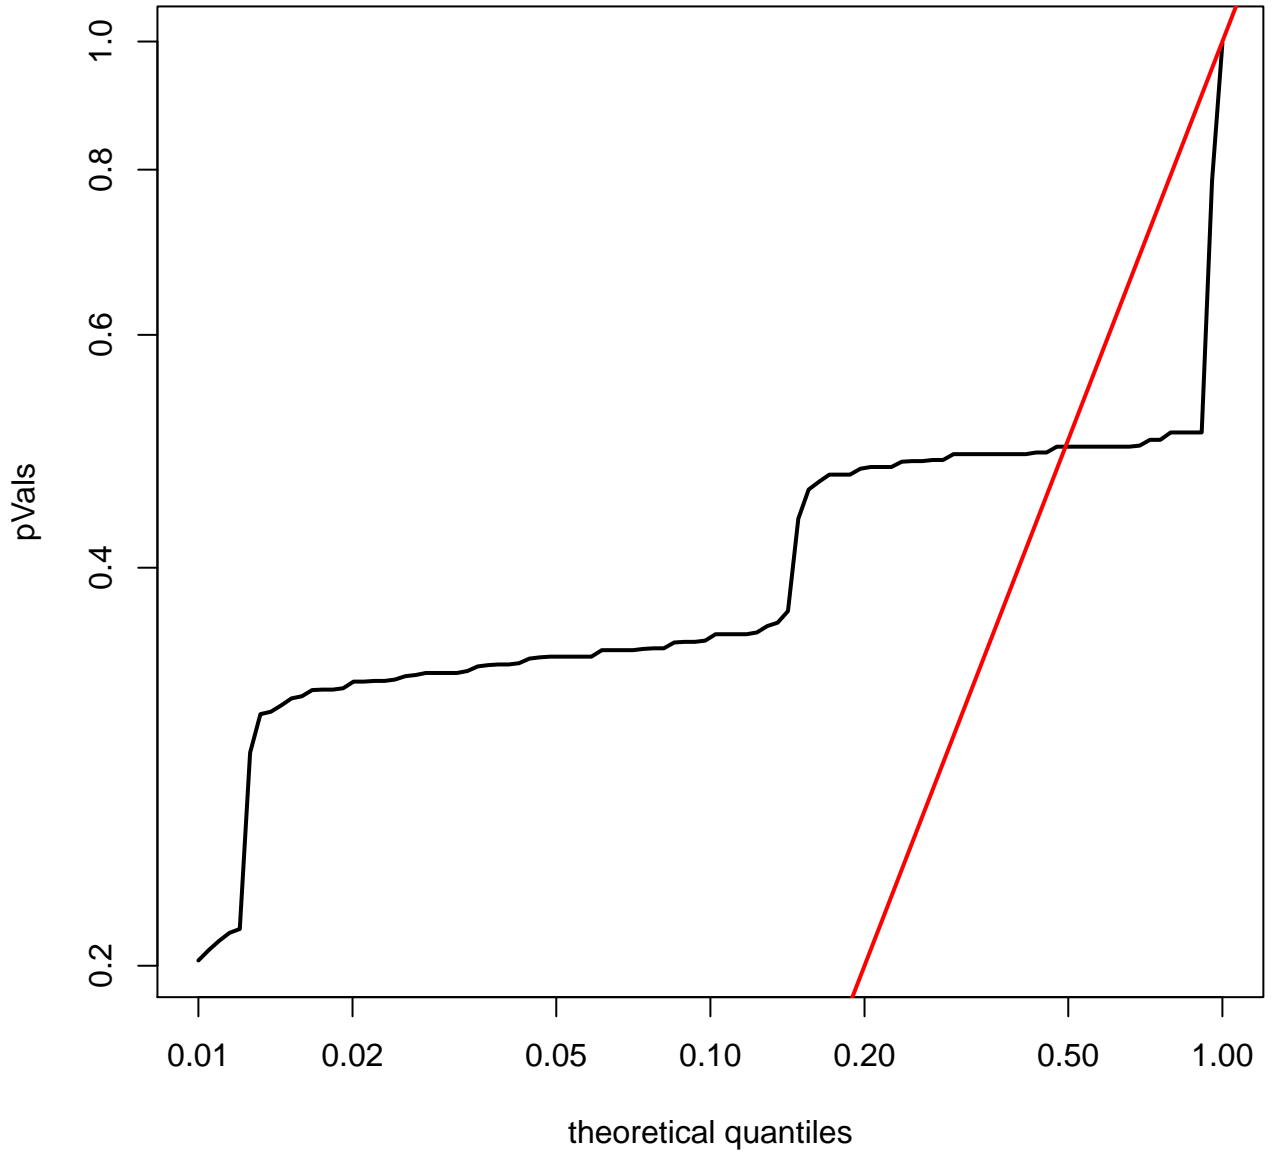

# Cumulative p-value distribution for TGCT

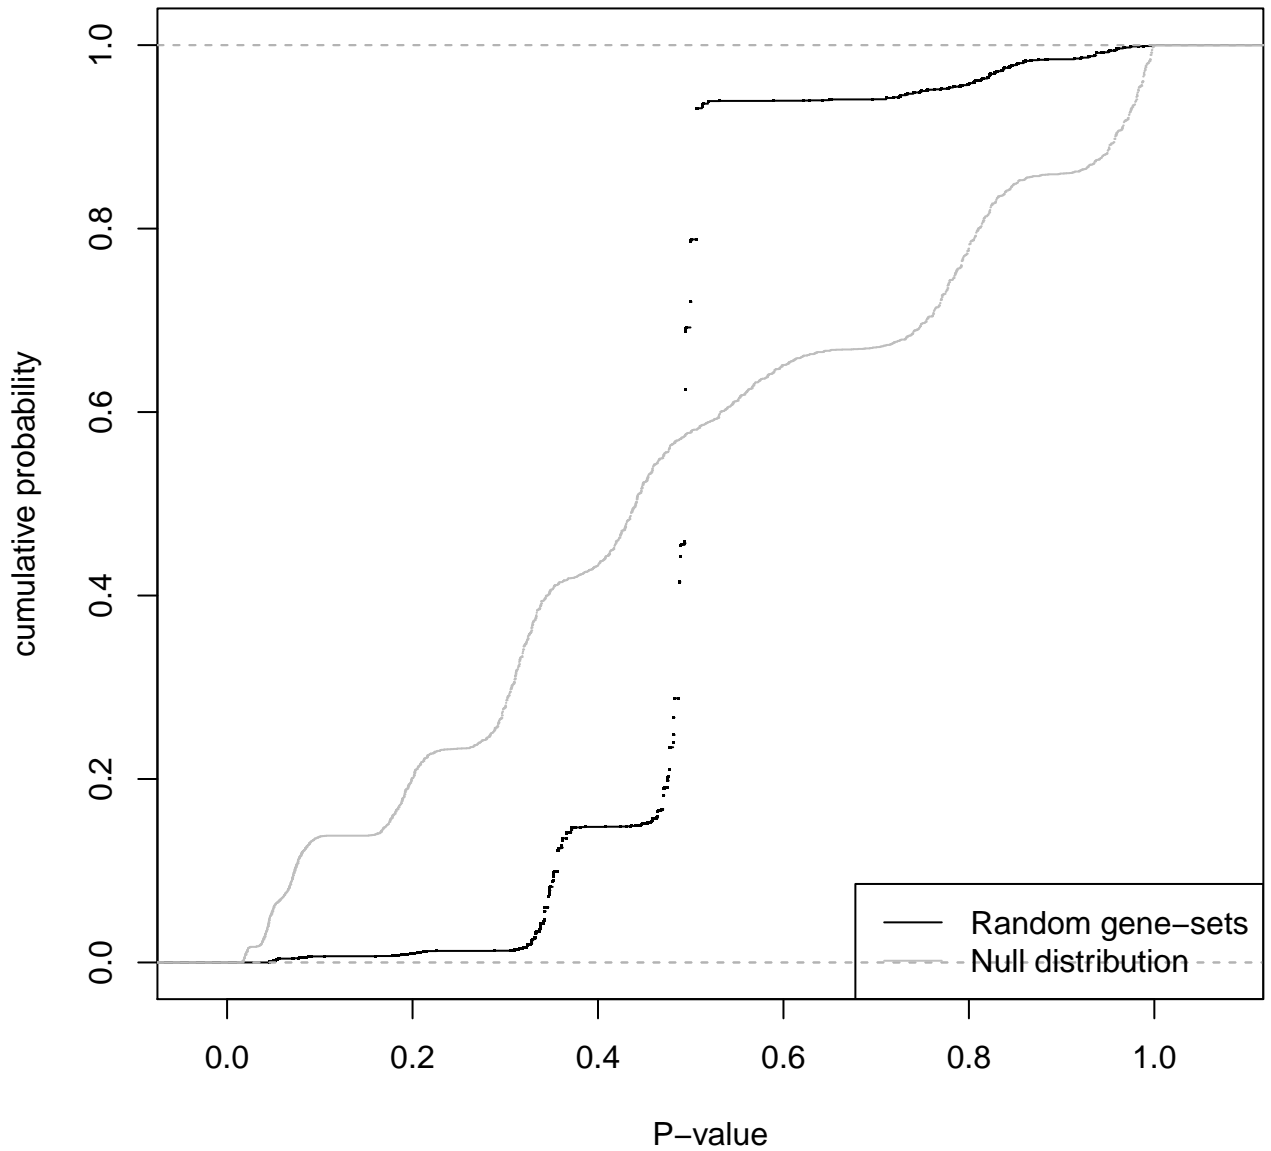

# Histogram for pVals for THCA

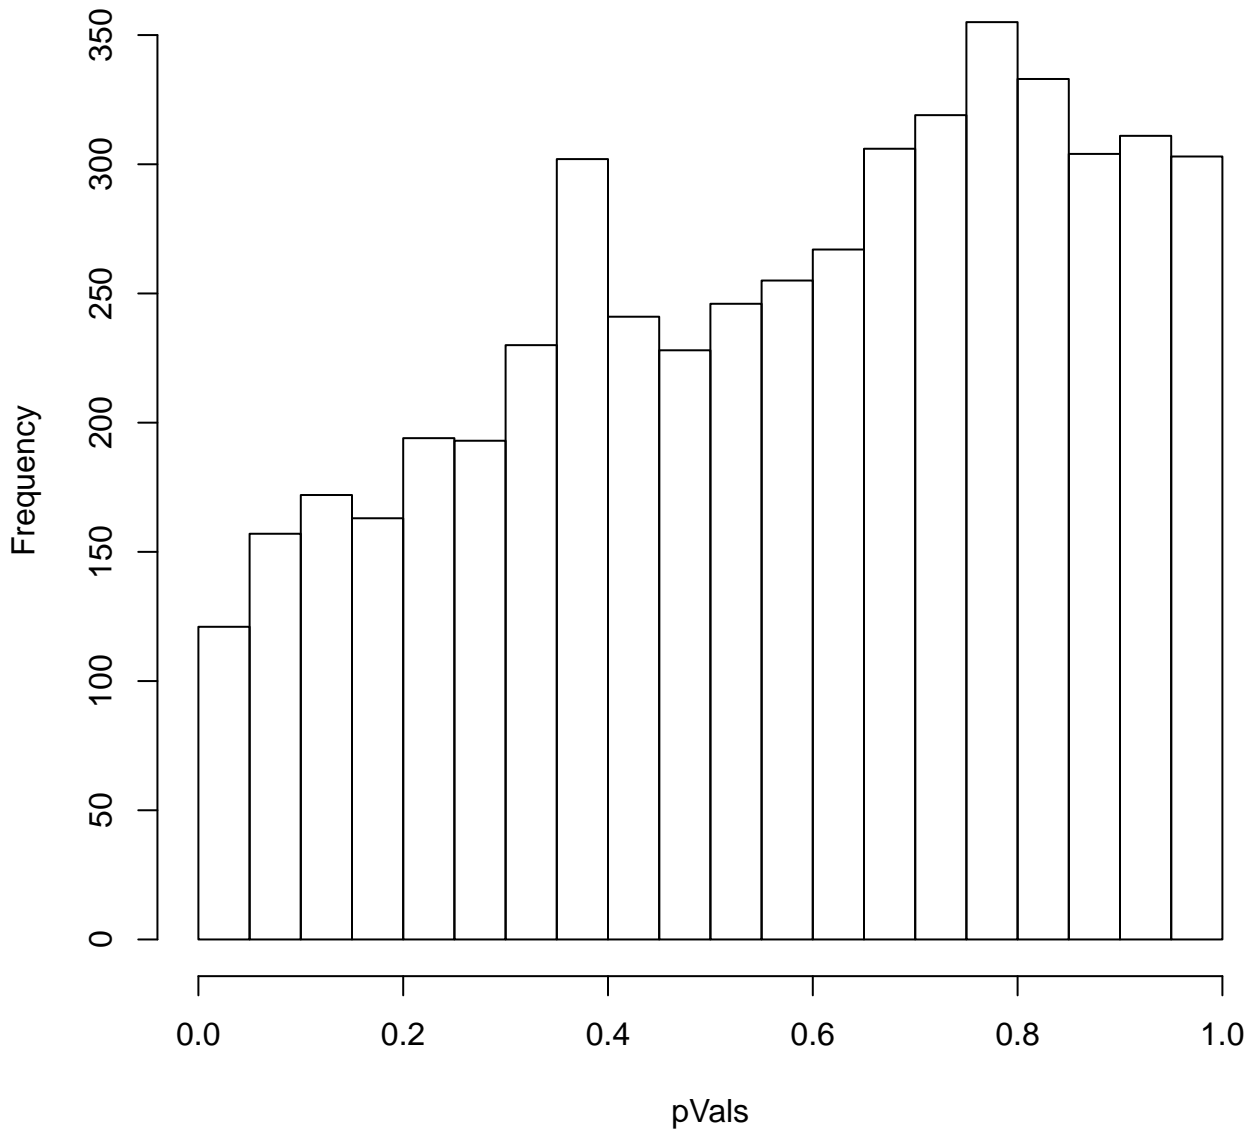

# quantile plot for THCA

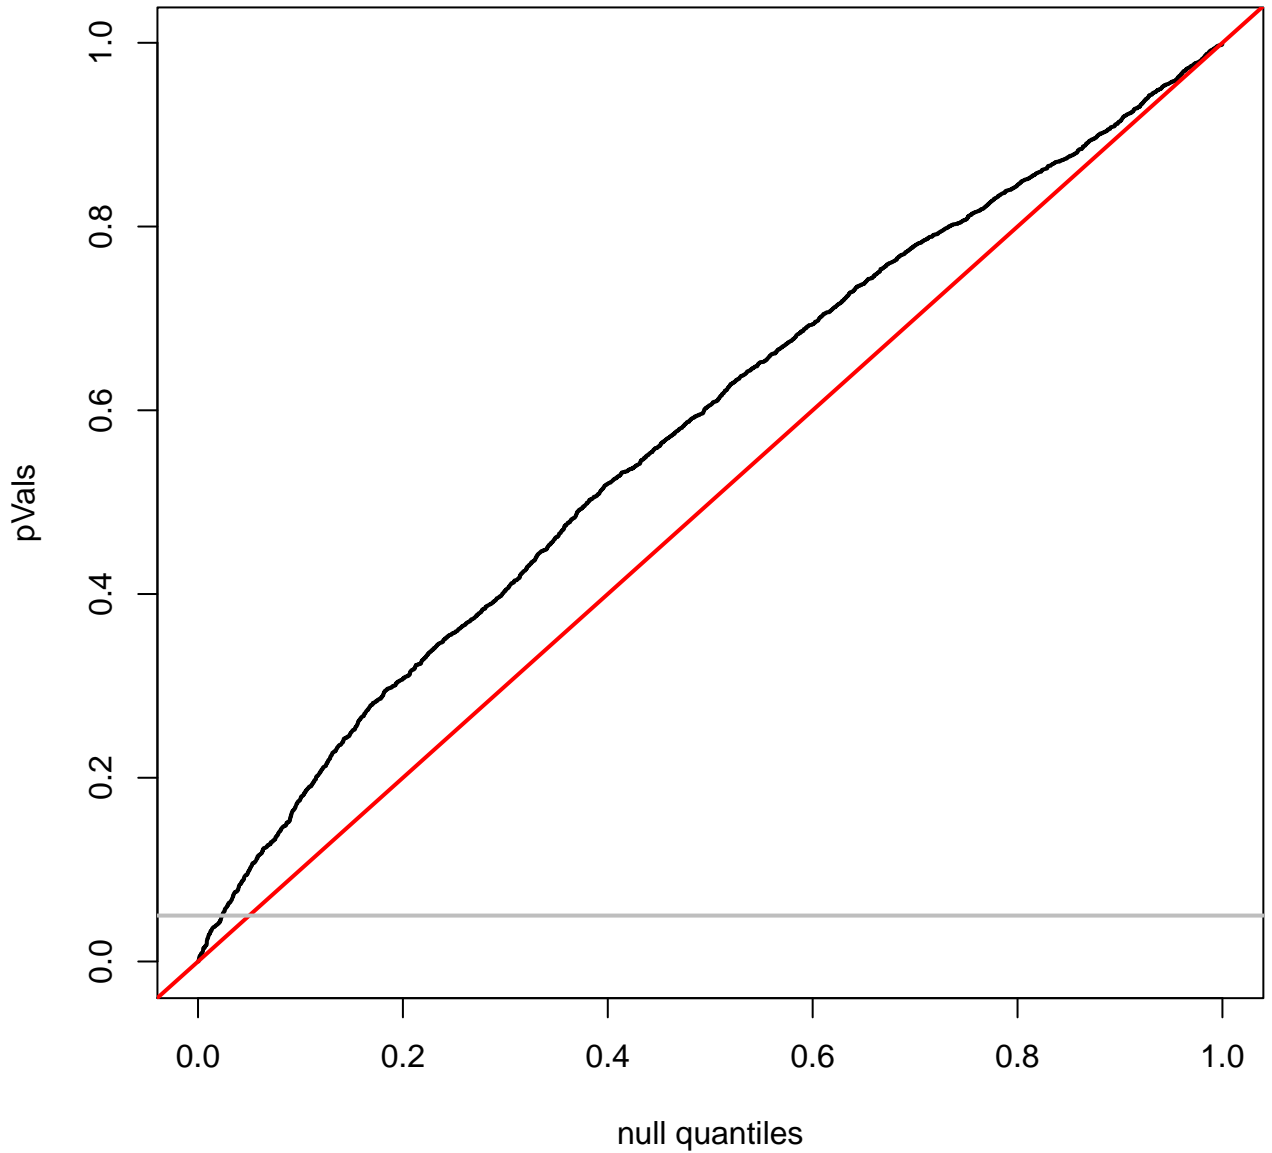

quantile plot for THCA  
(log-scale)

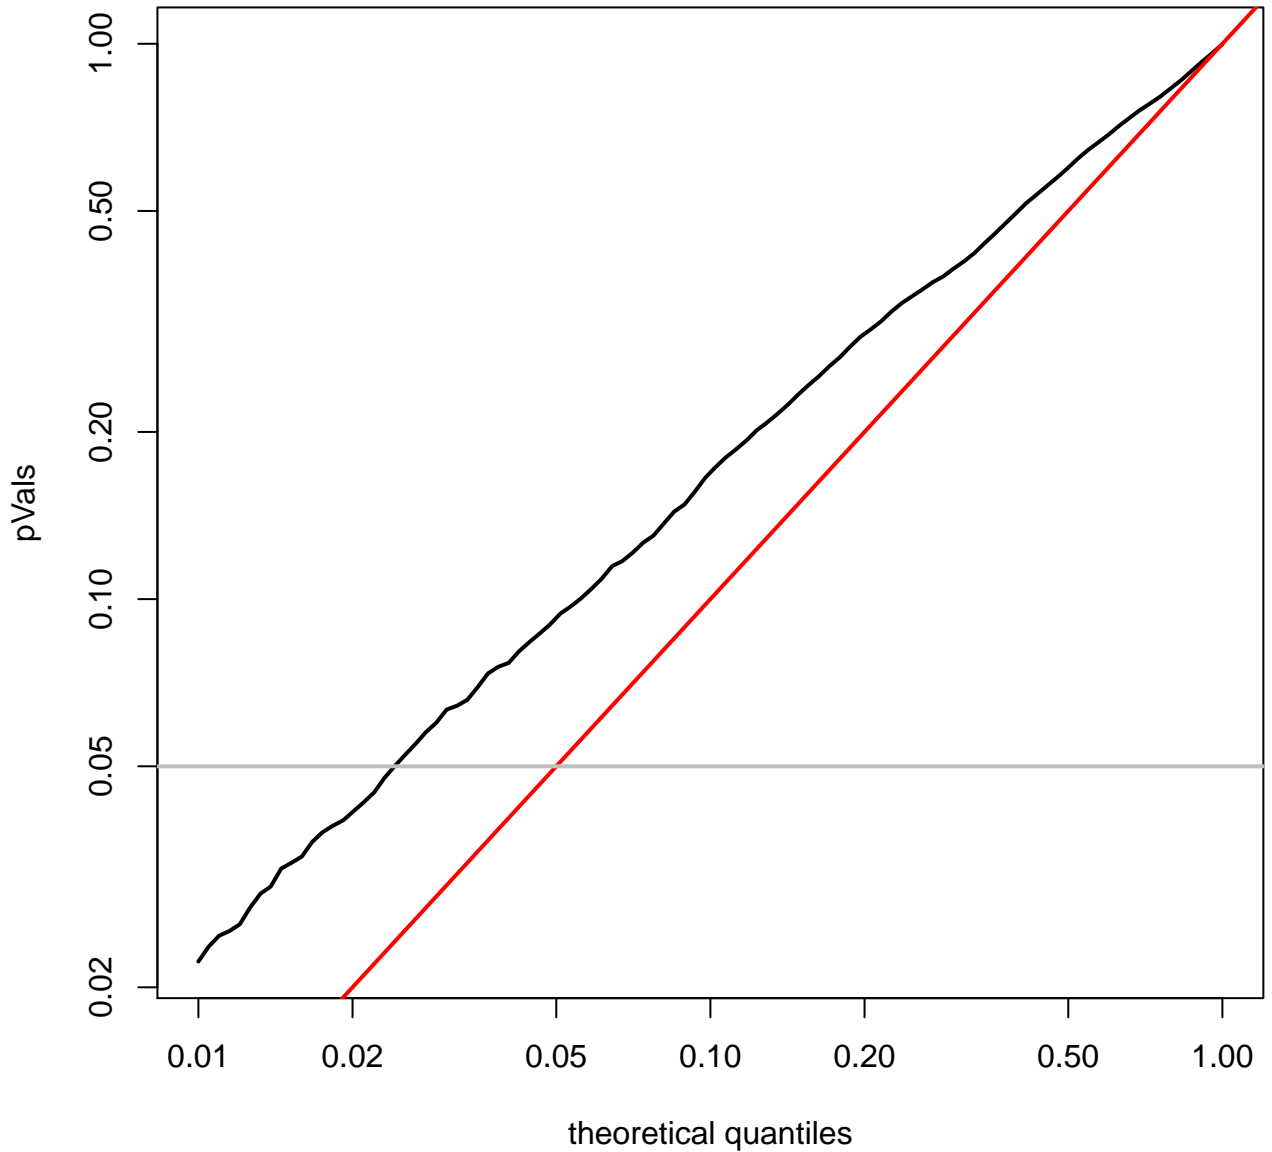

# Cumulative p-value distribution for THCA

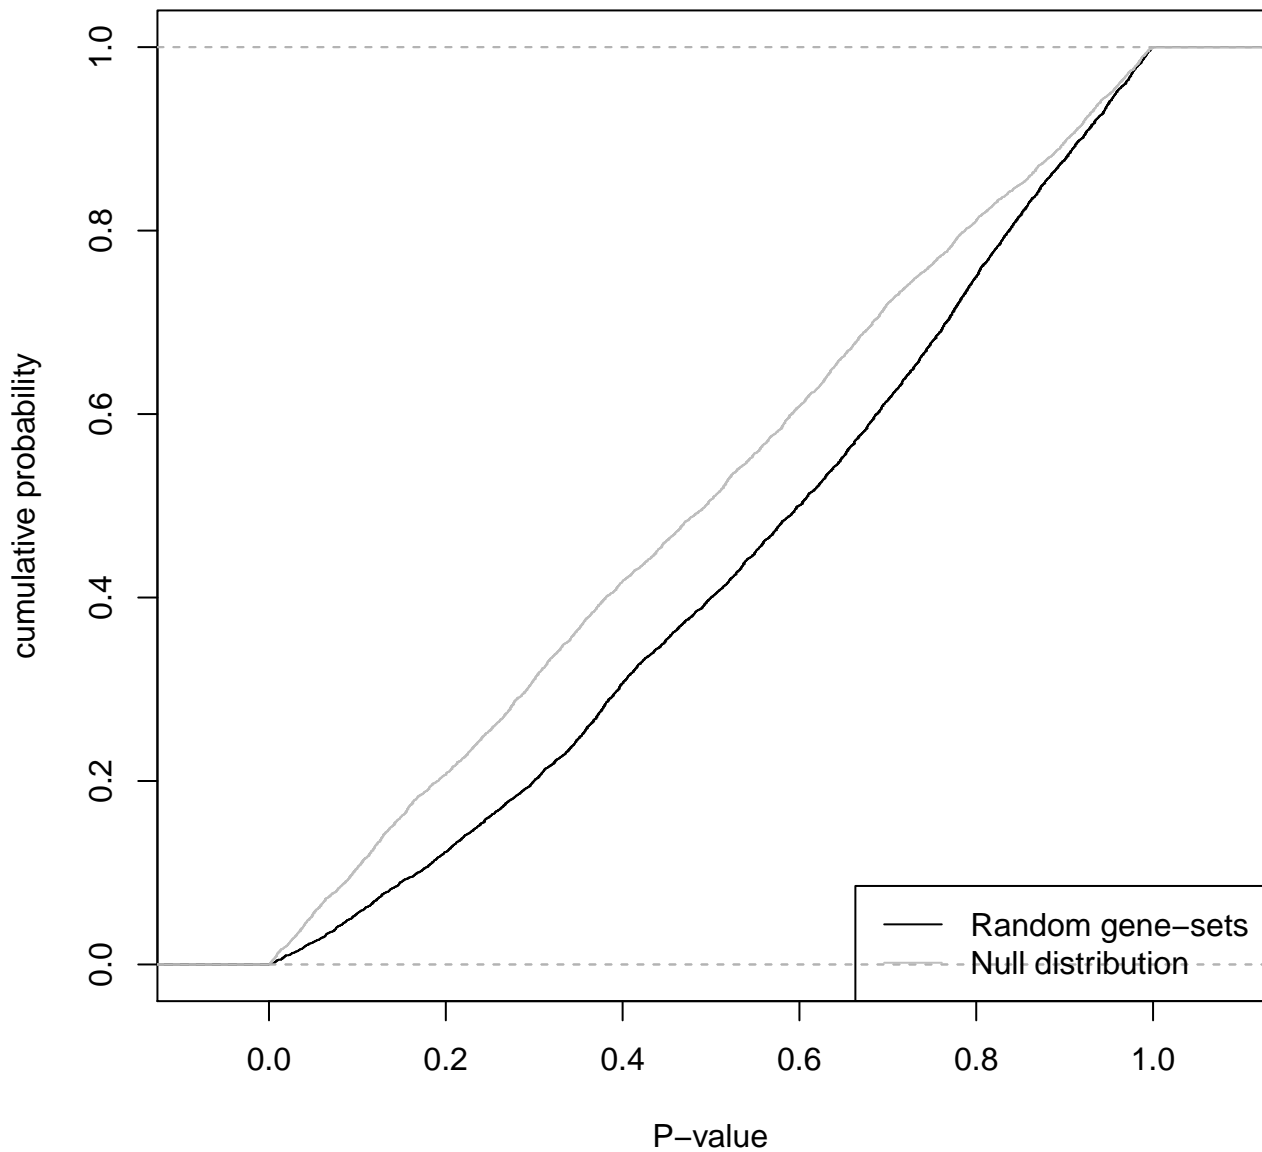



### Histogram for pVals for THYM

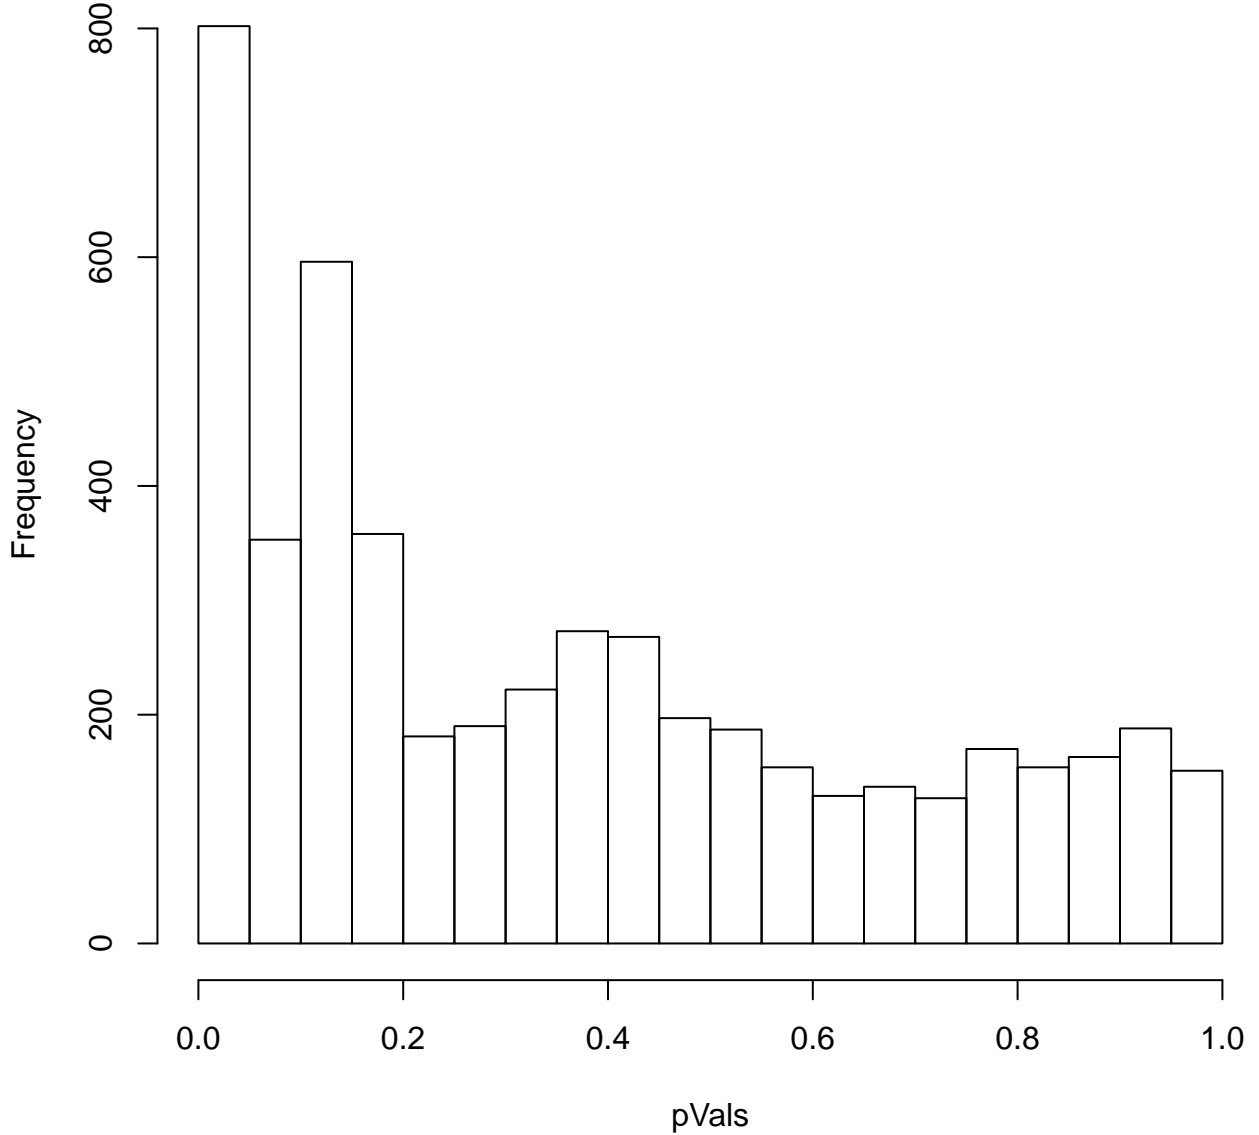

quantile plot for THYM

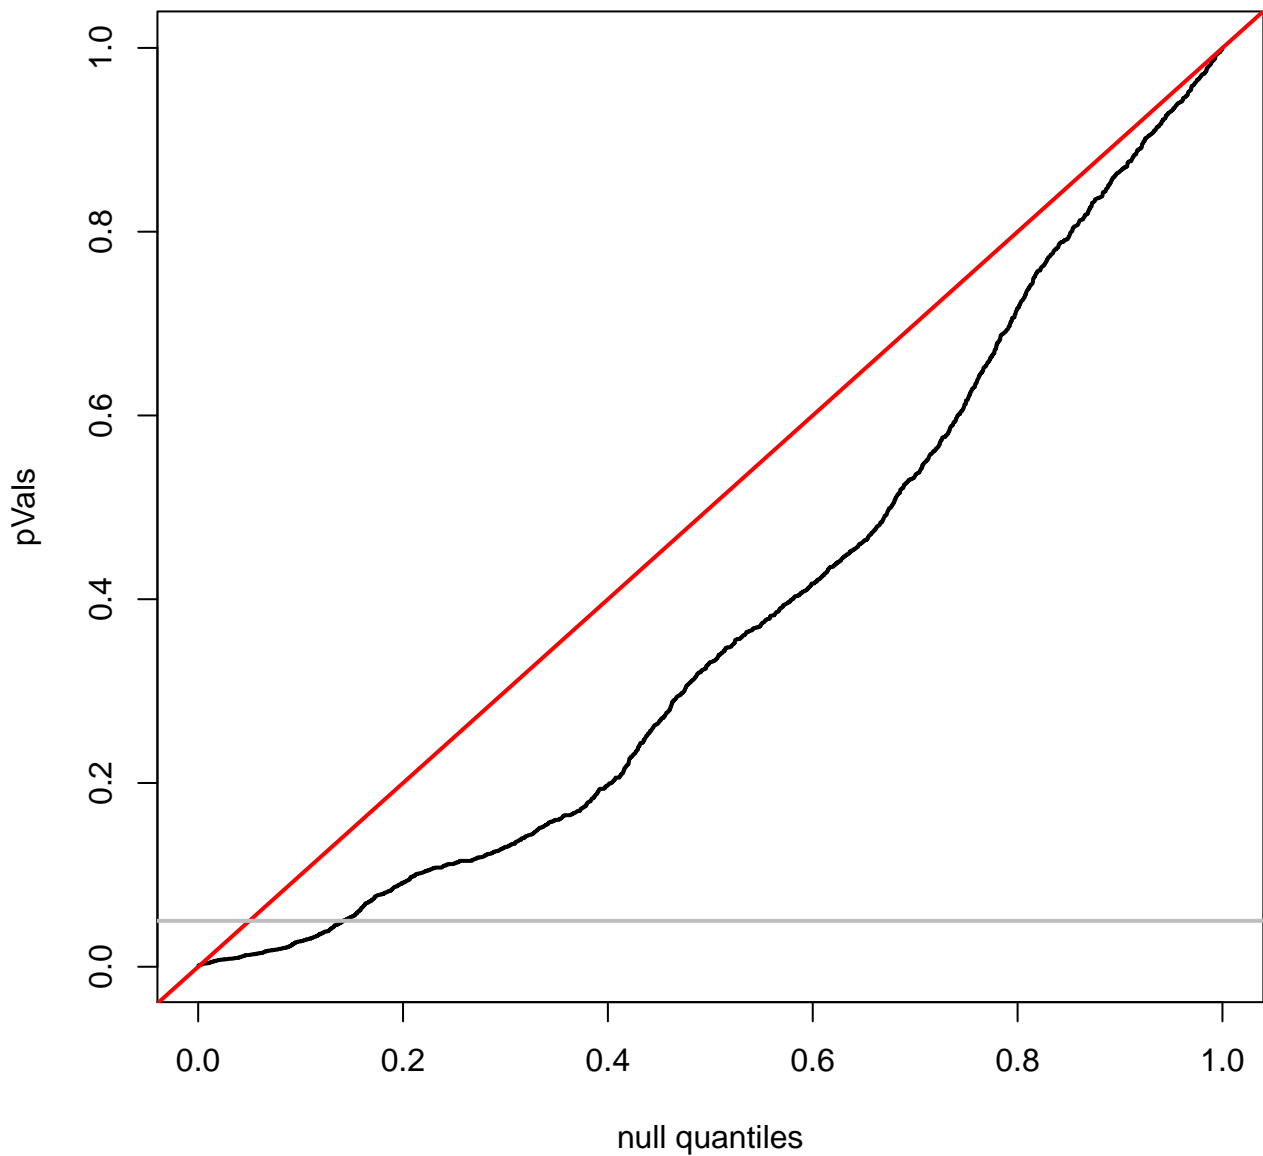

quantile plot for THYM  
(log-scale)

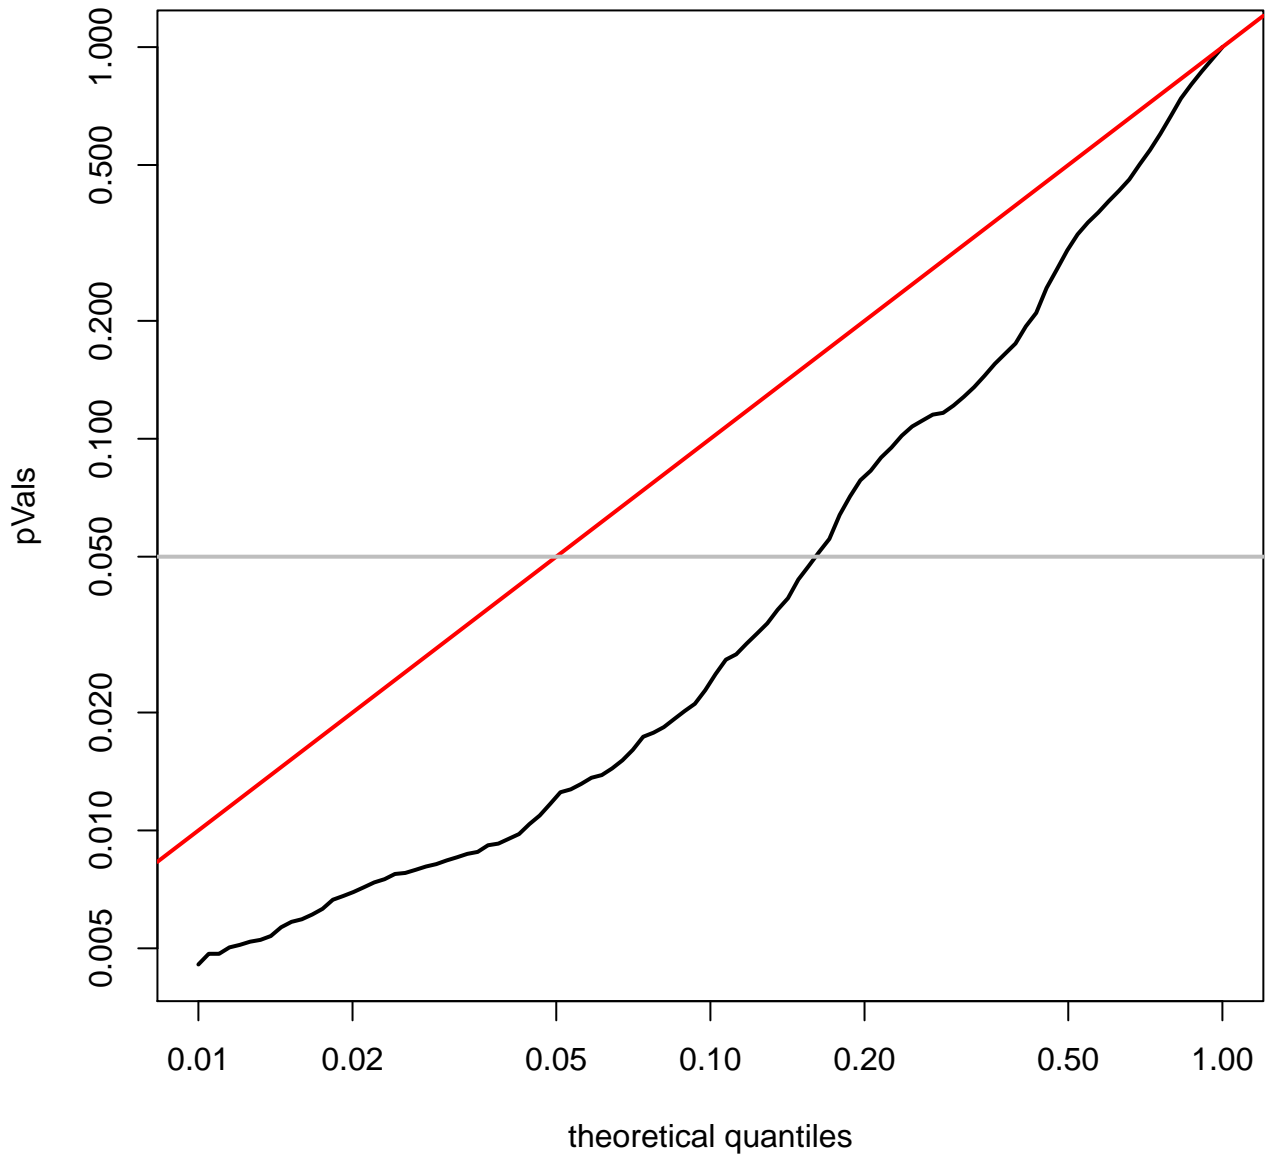

# Cumulative p-value distribution for THYM

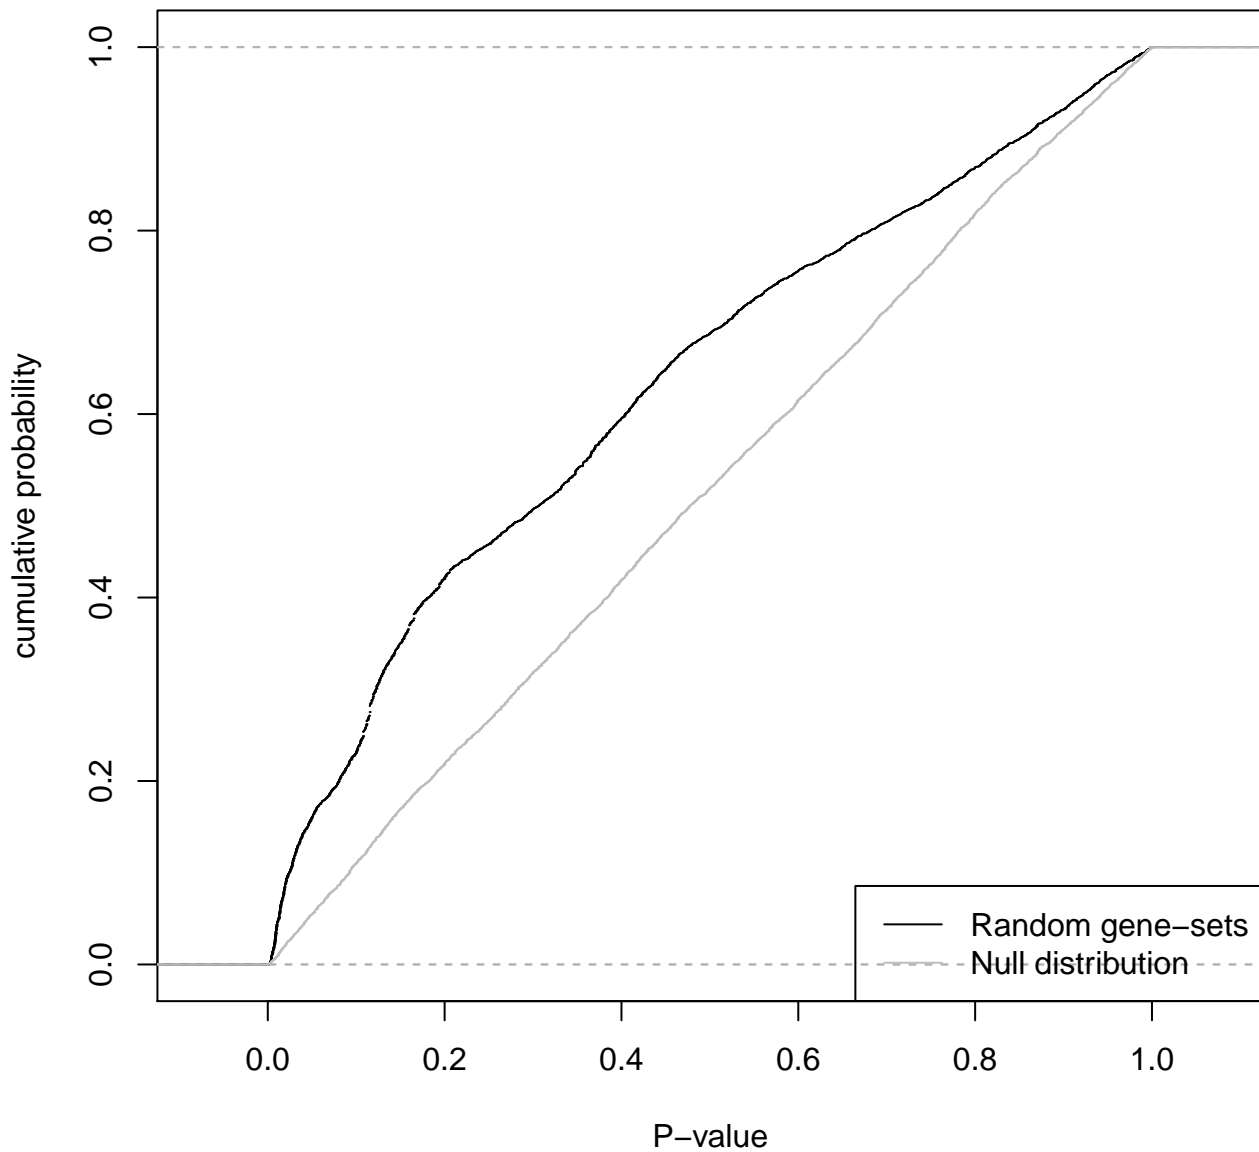

# Histogram for pVals for UCEC

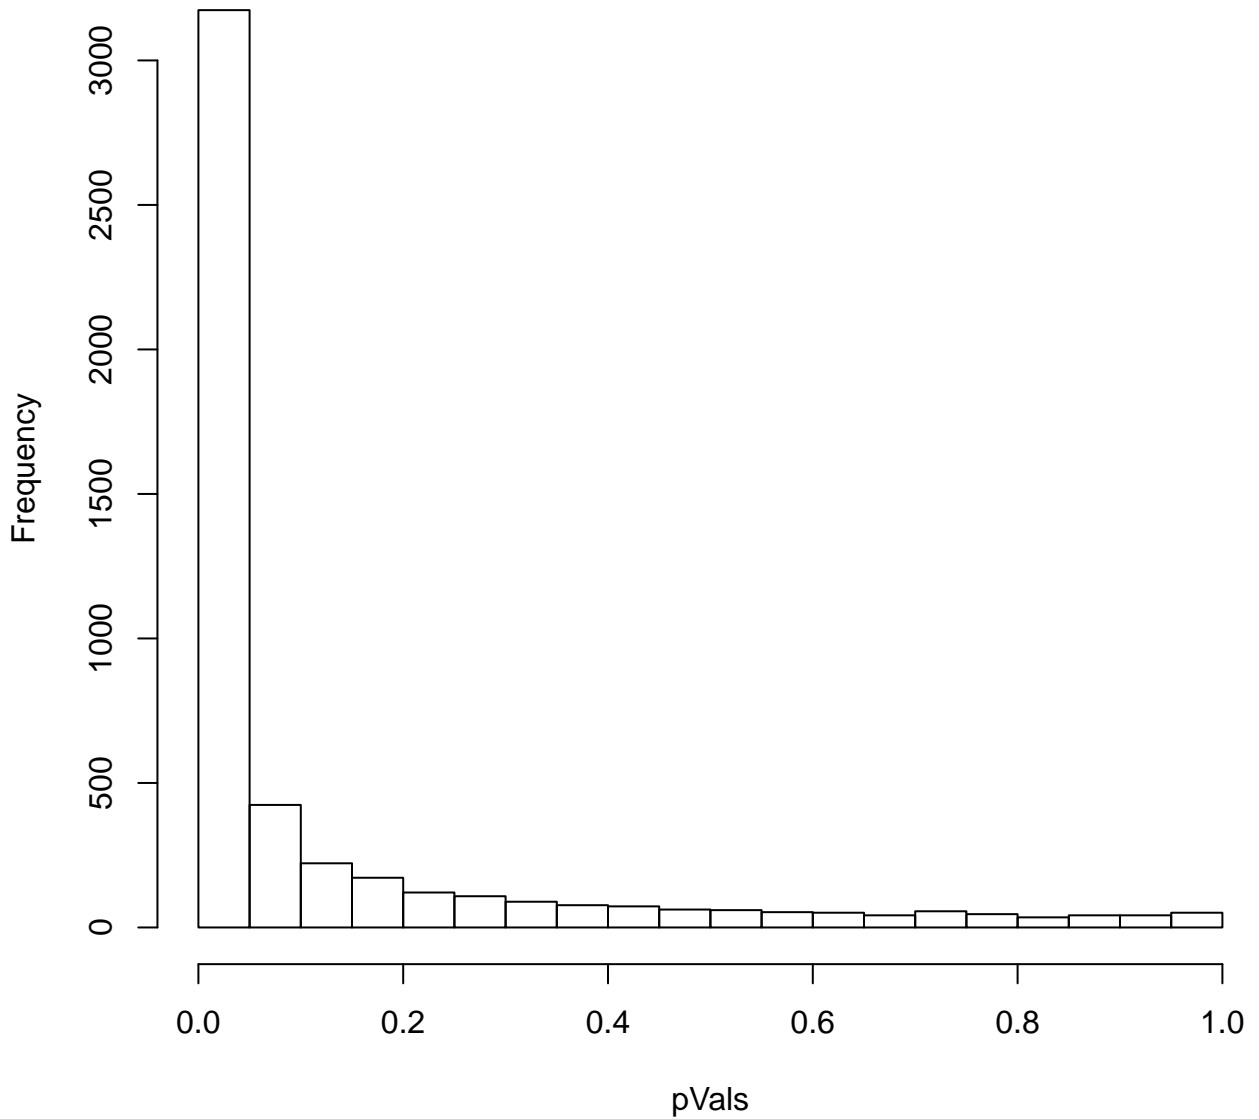

quantile plot for UCEC

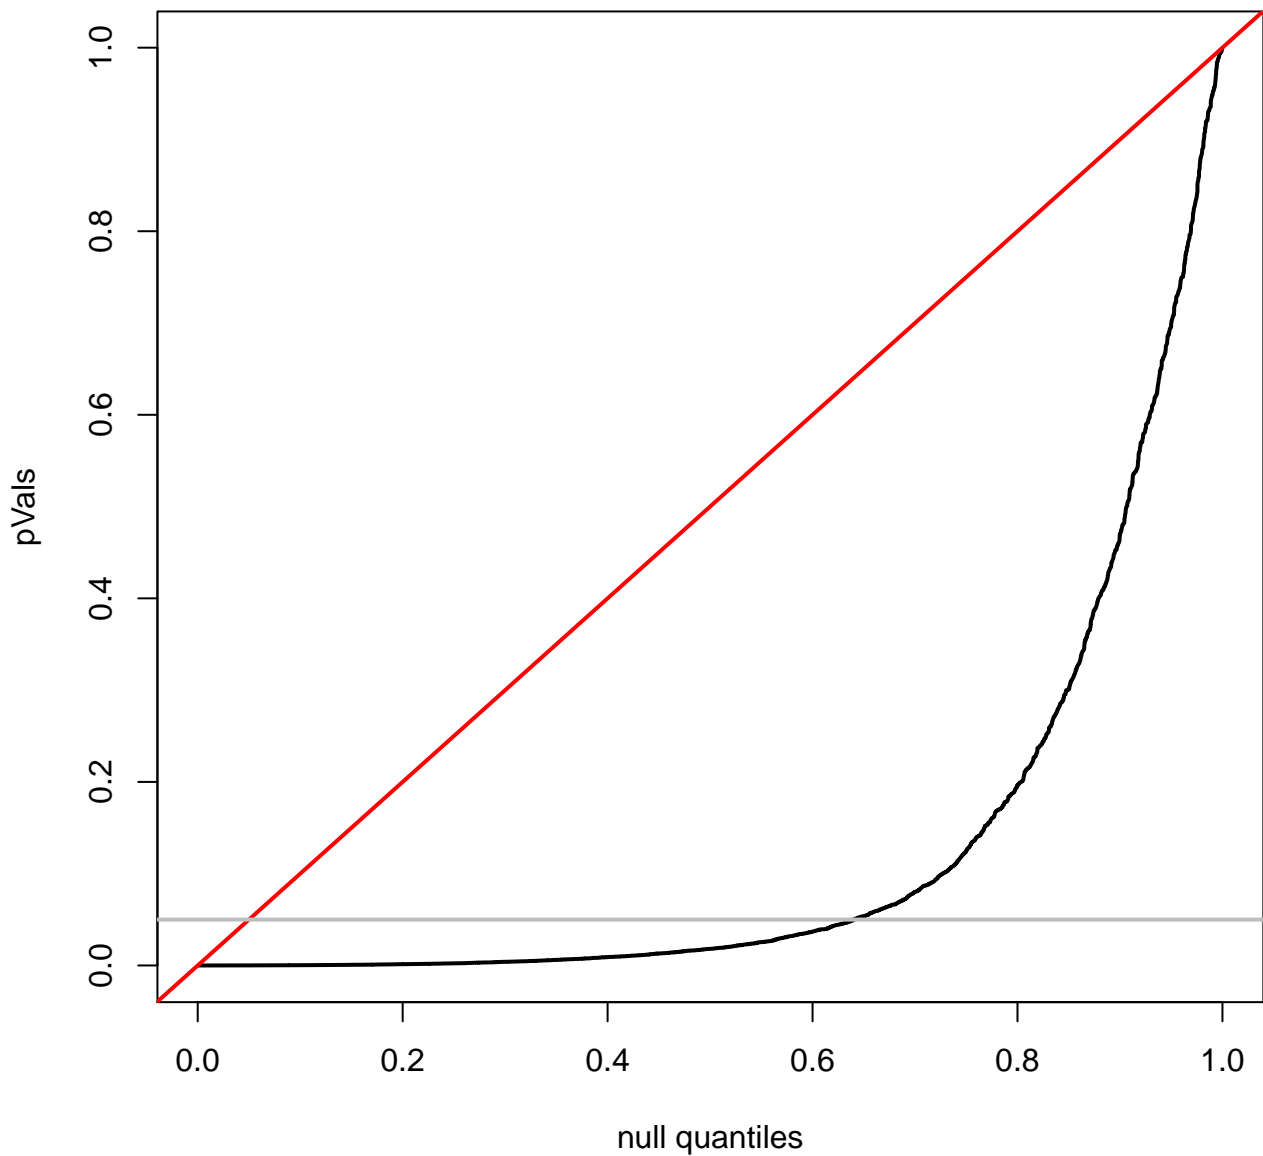

quantile plot for UCEC  
(log-scale)

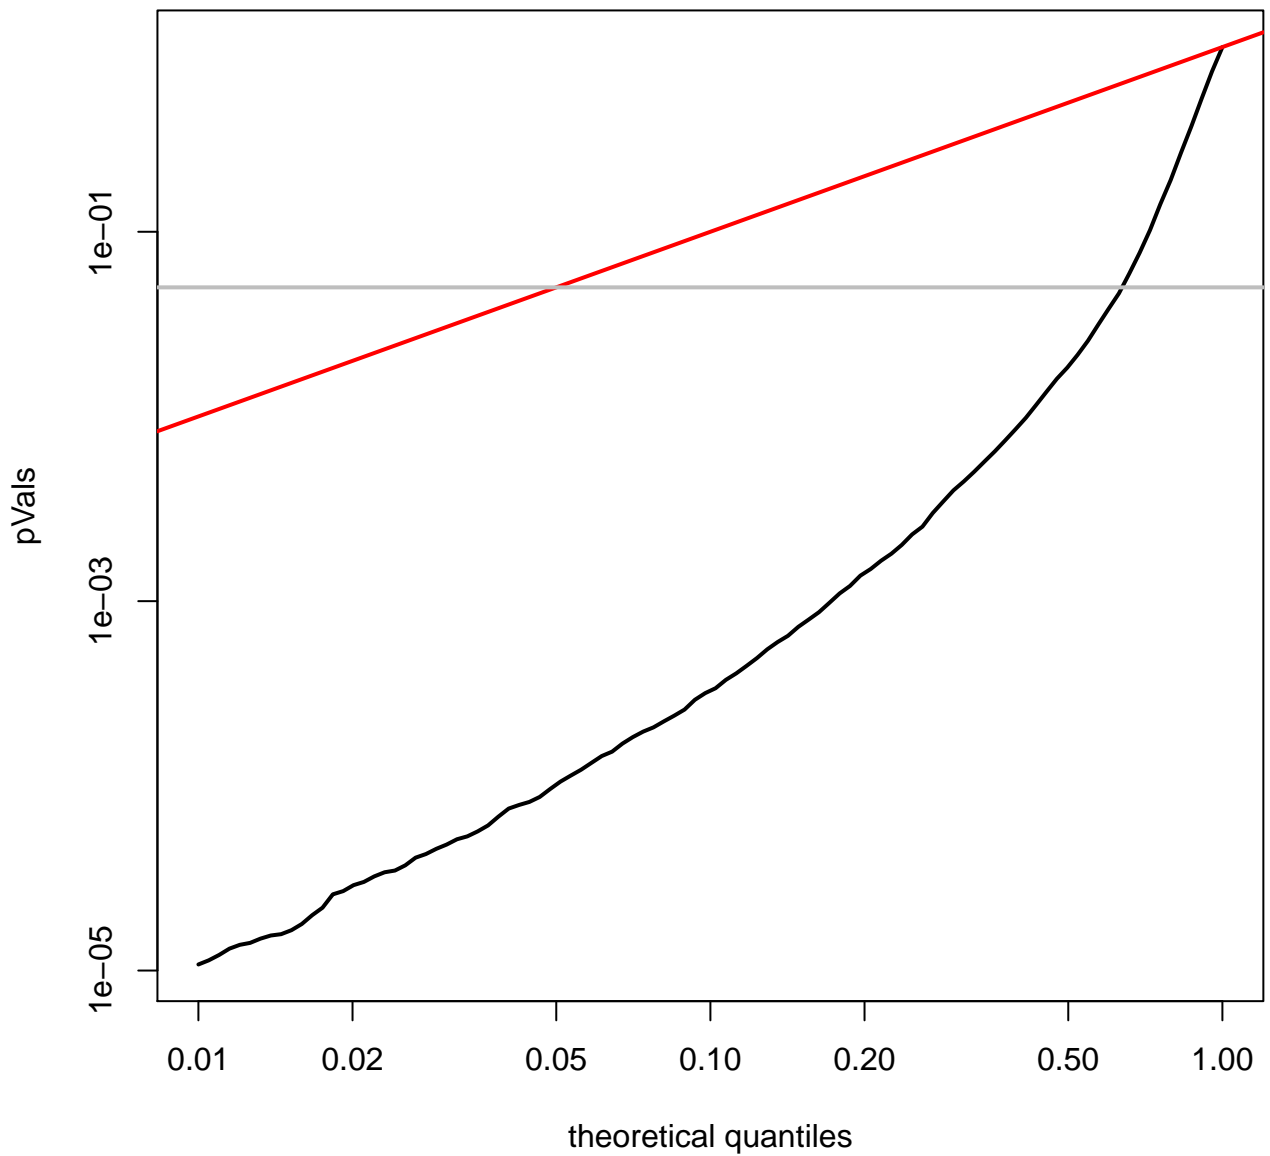

# Cumulative p-value distribution for UCEC

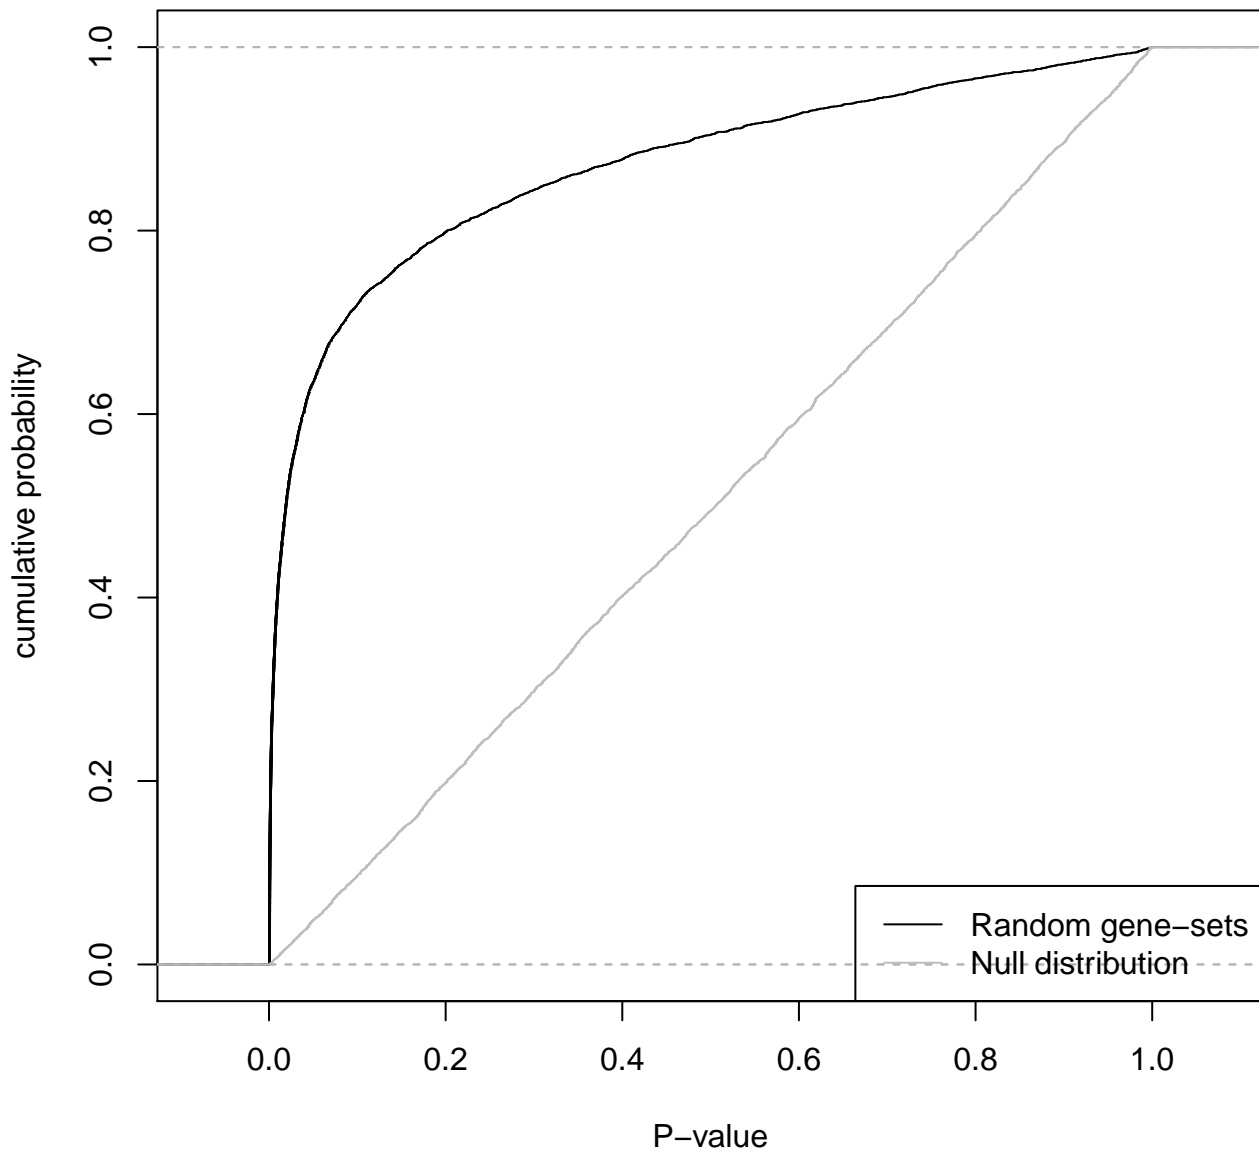



### Histogram for pVals for UCS

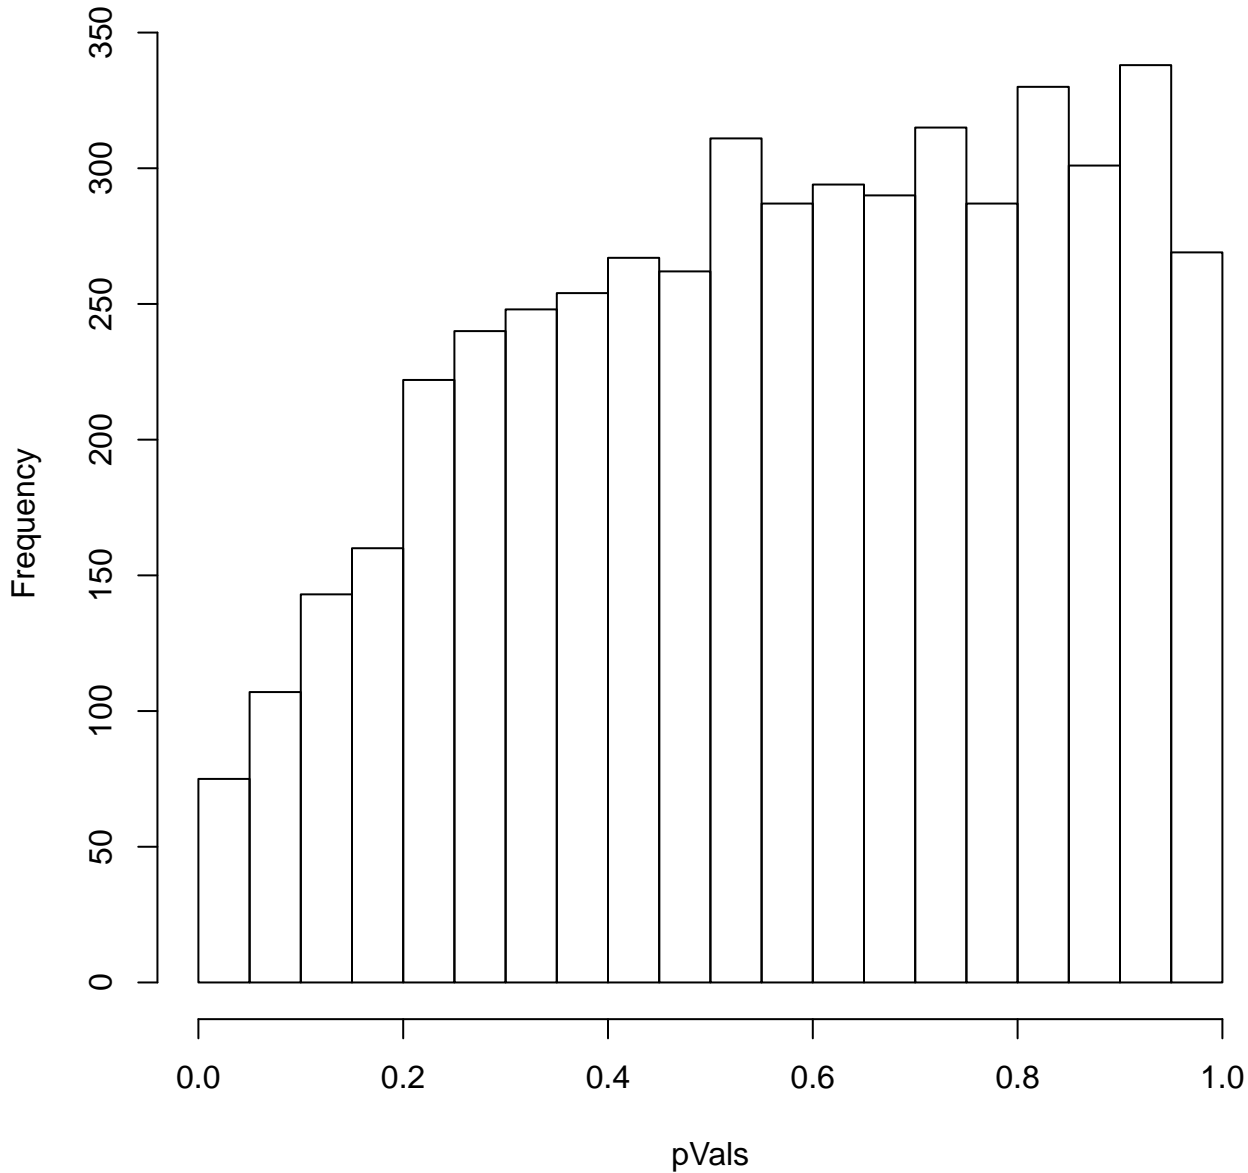

quantile plot for UCS

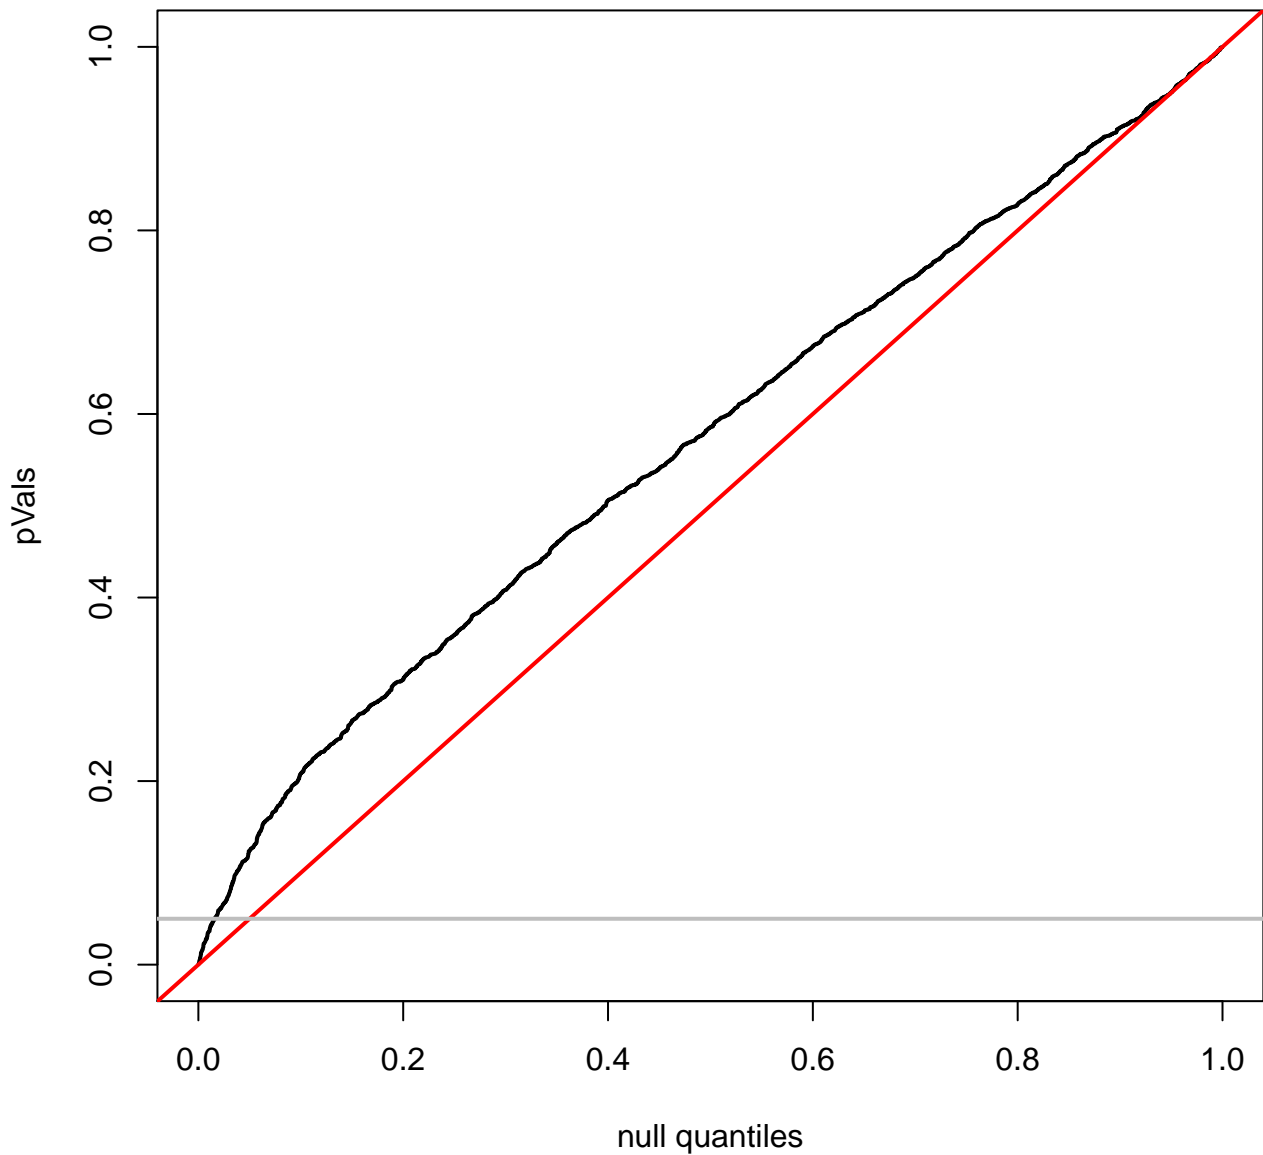

quantile plot for UCS  
(log-scale)

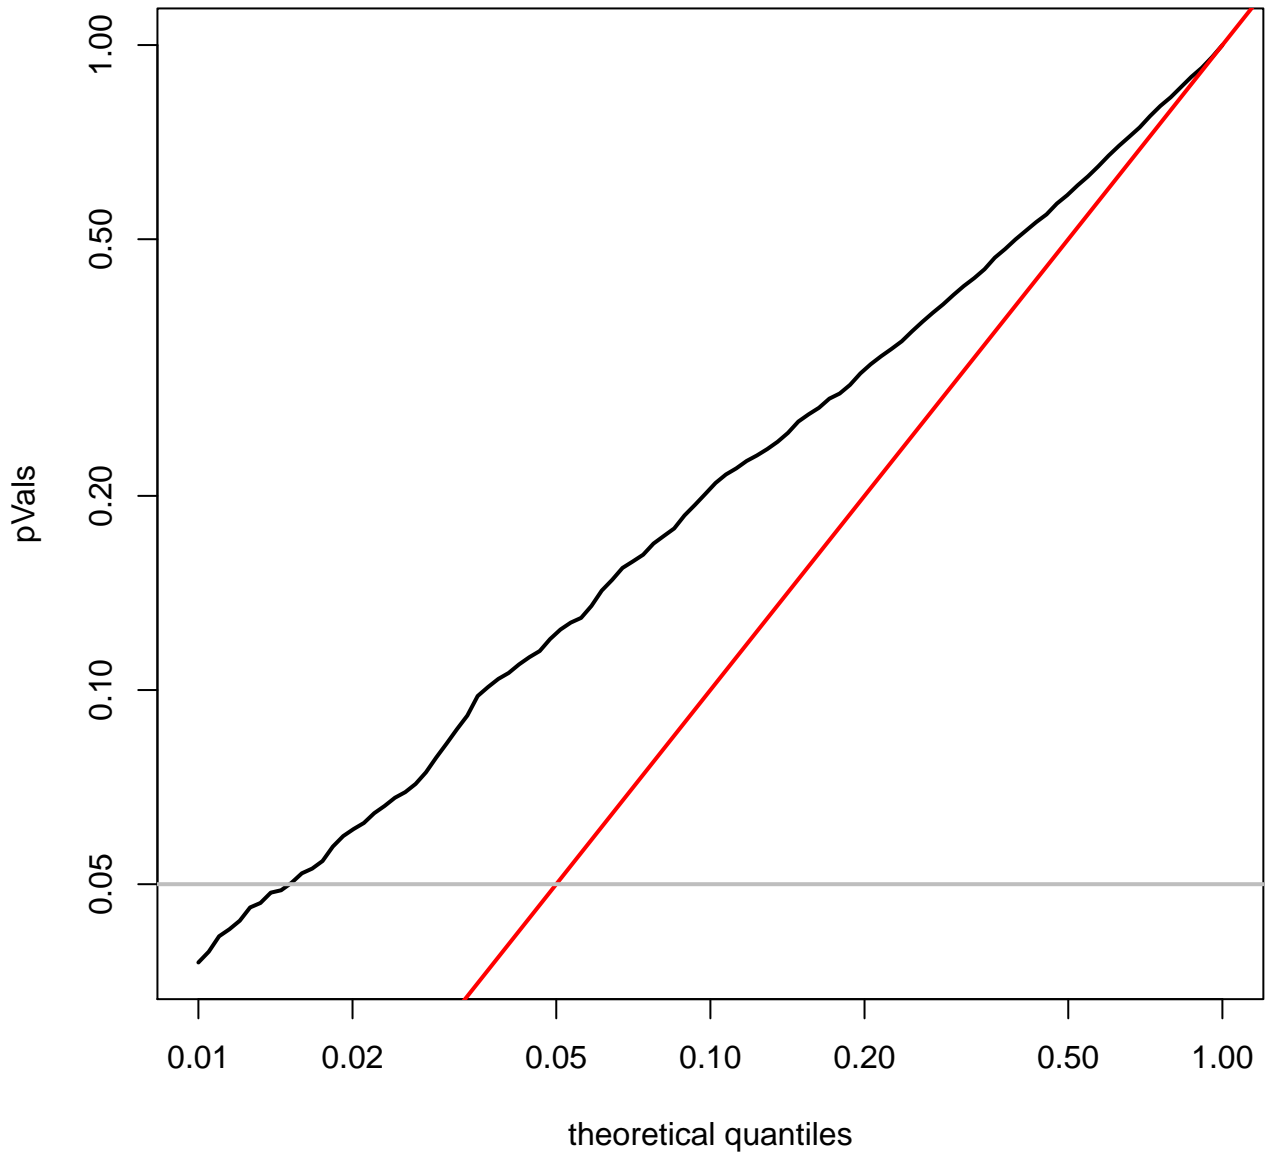

# Cumulative p-value distribution for UCS

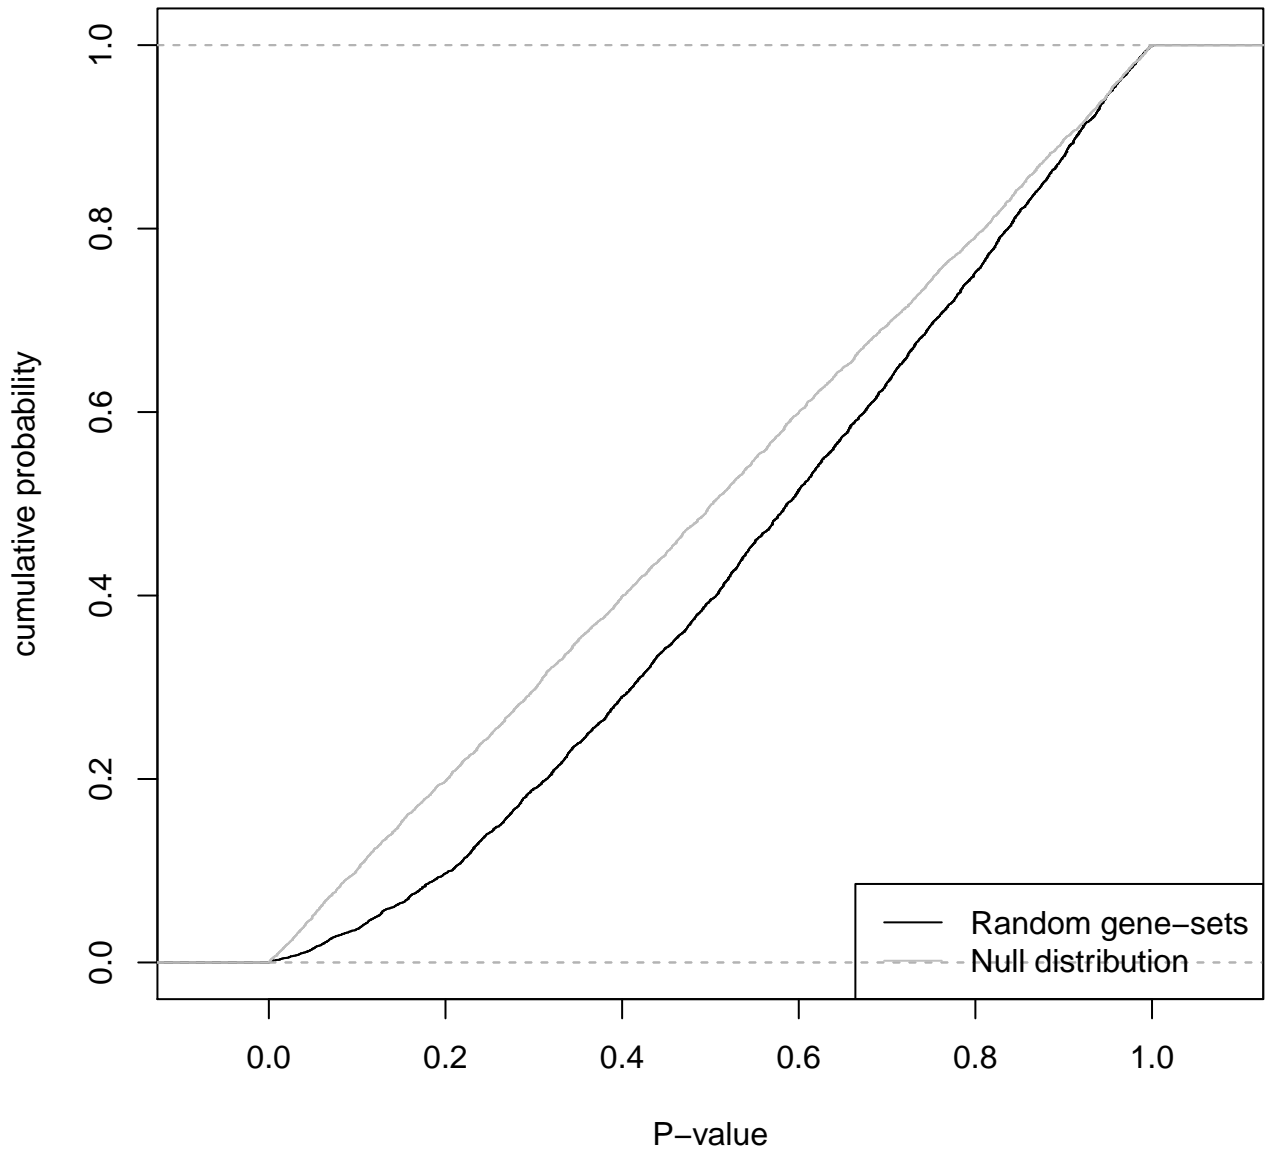

# Histogram for pVals for UVM

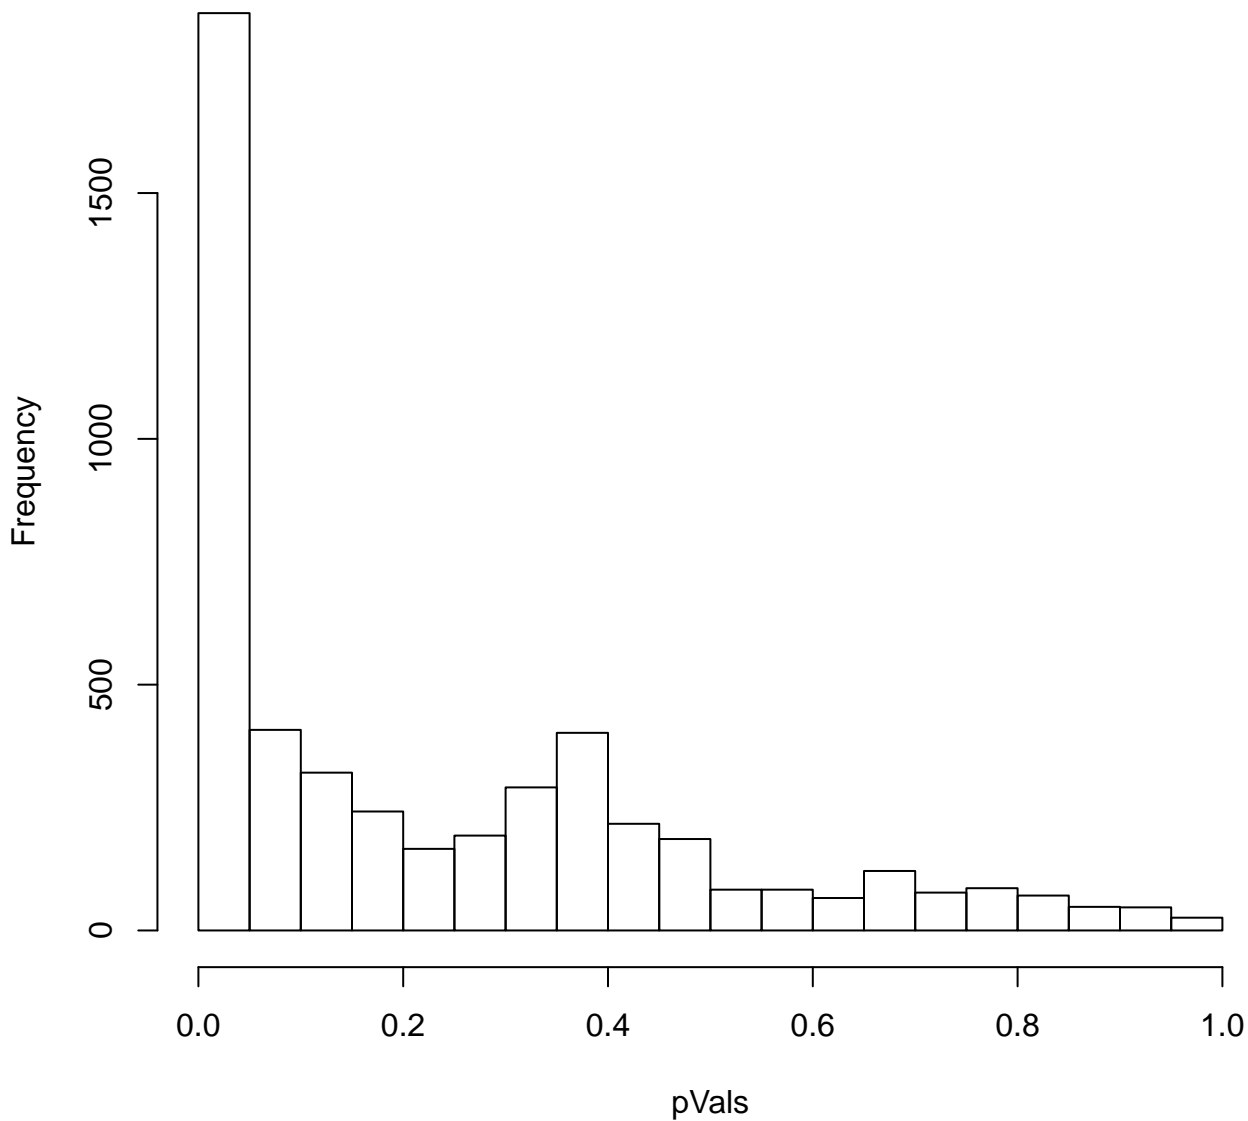

quantile plot for UVM

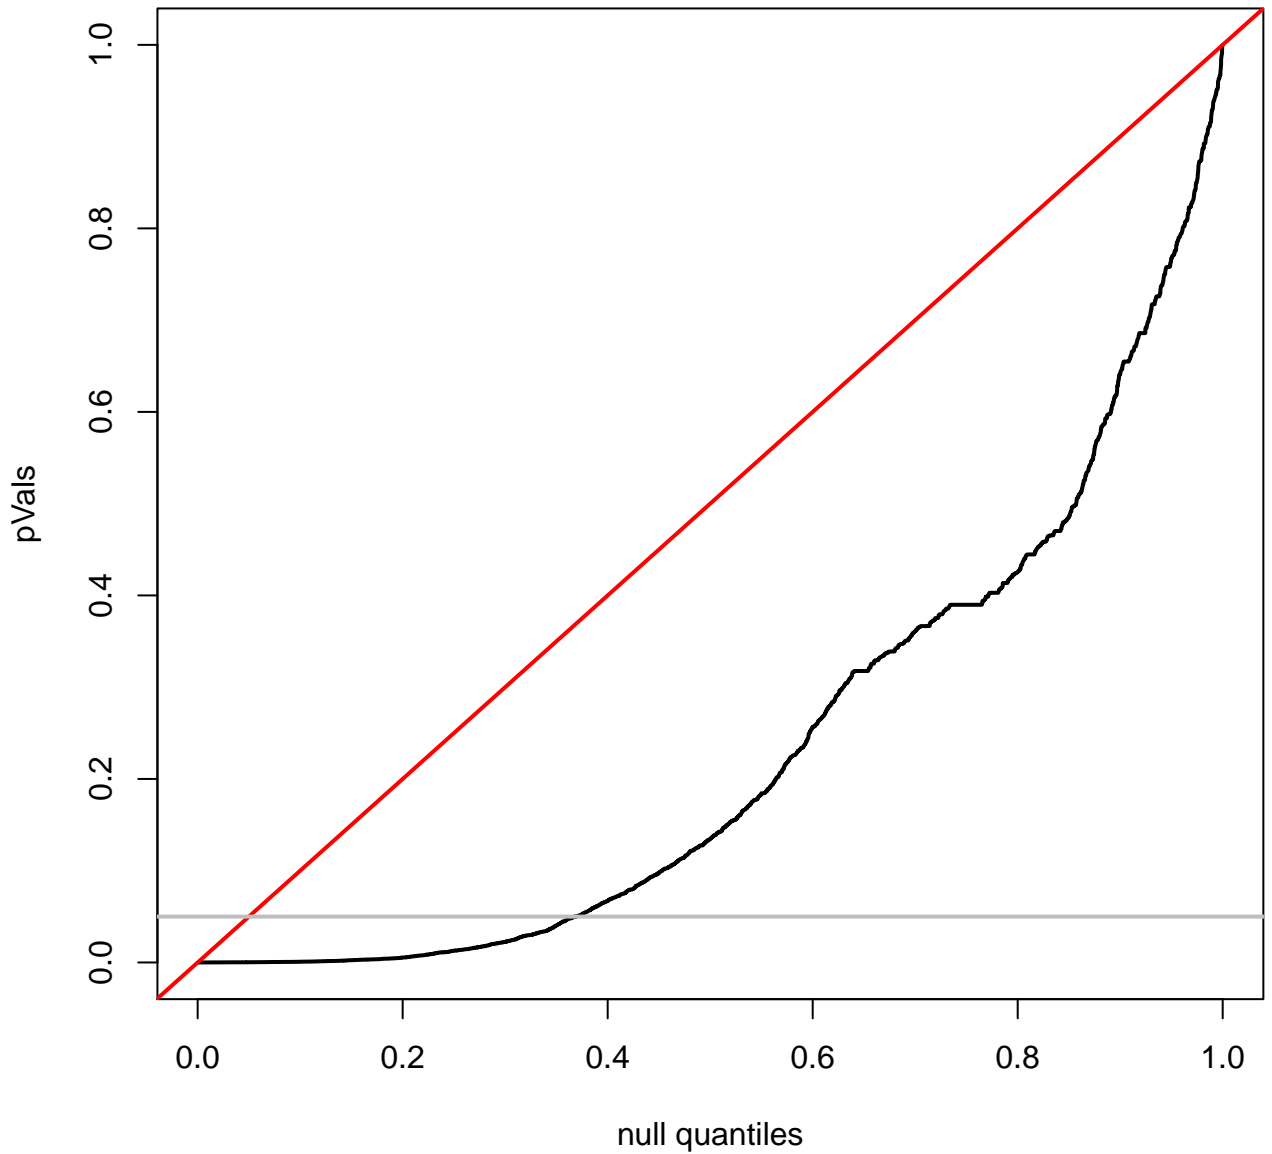

# quantile plot for UVM (log-scale)

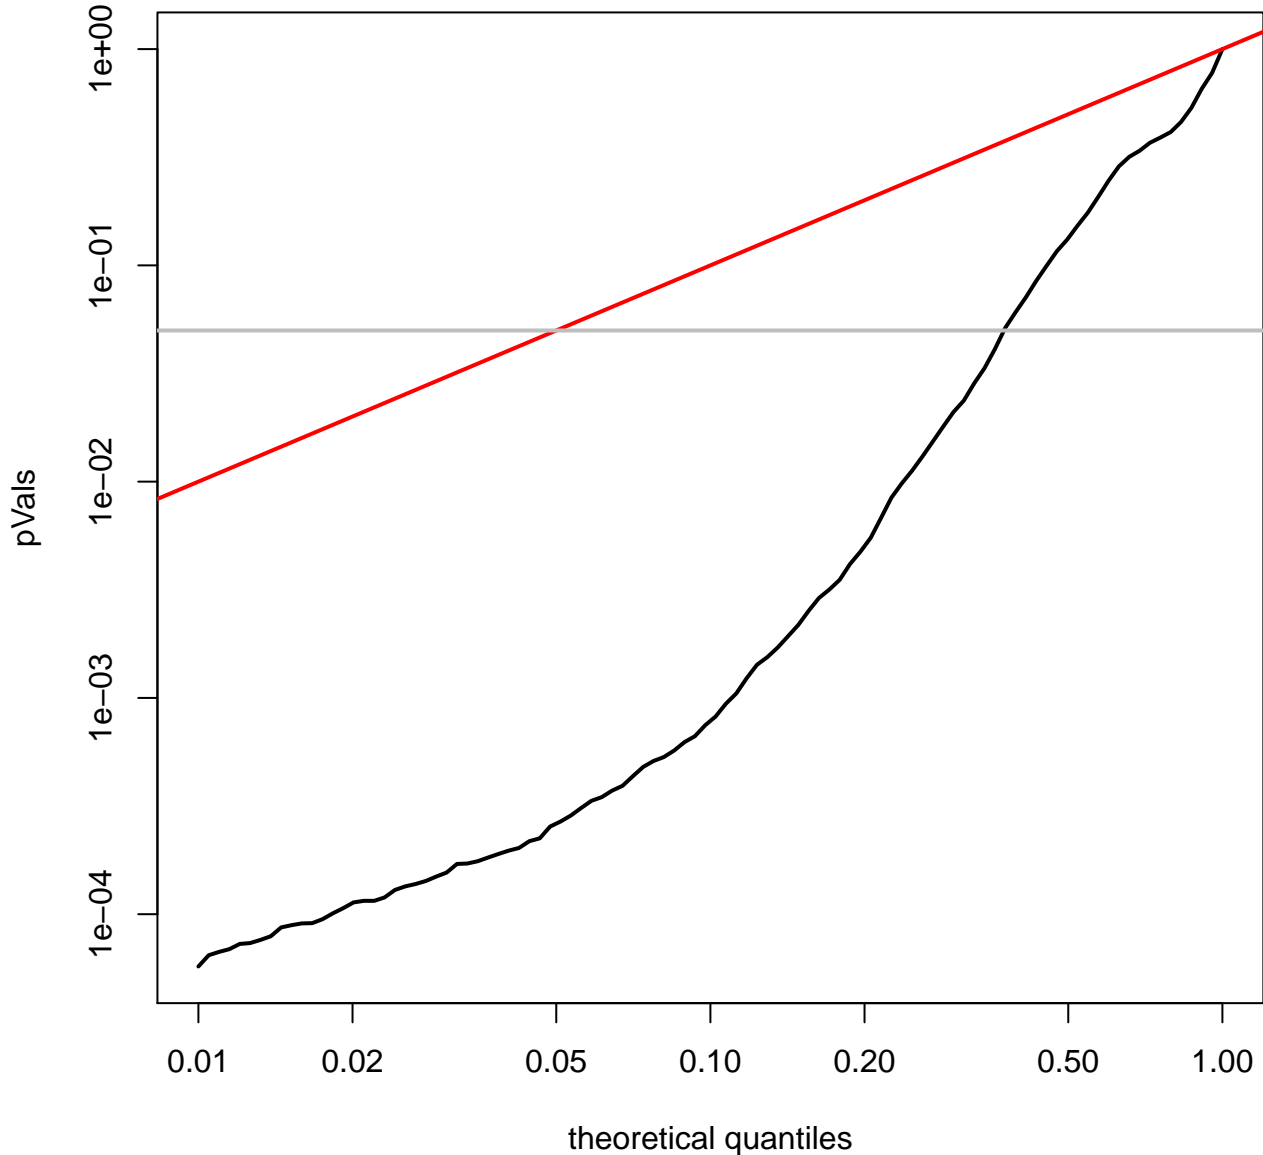

# Cumulative p-value distribution for UVM

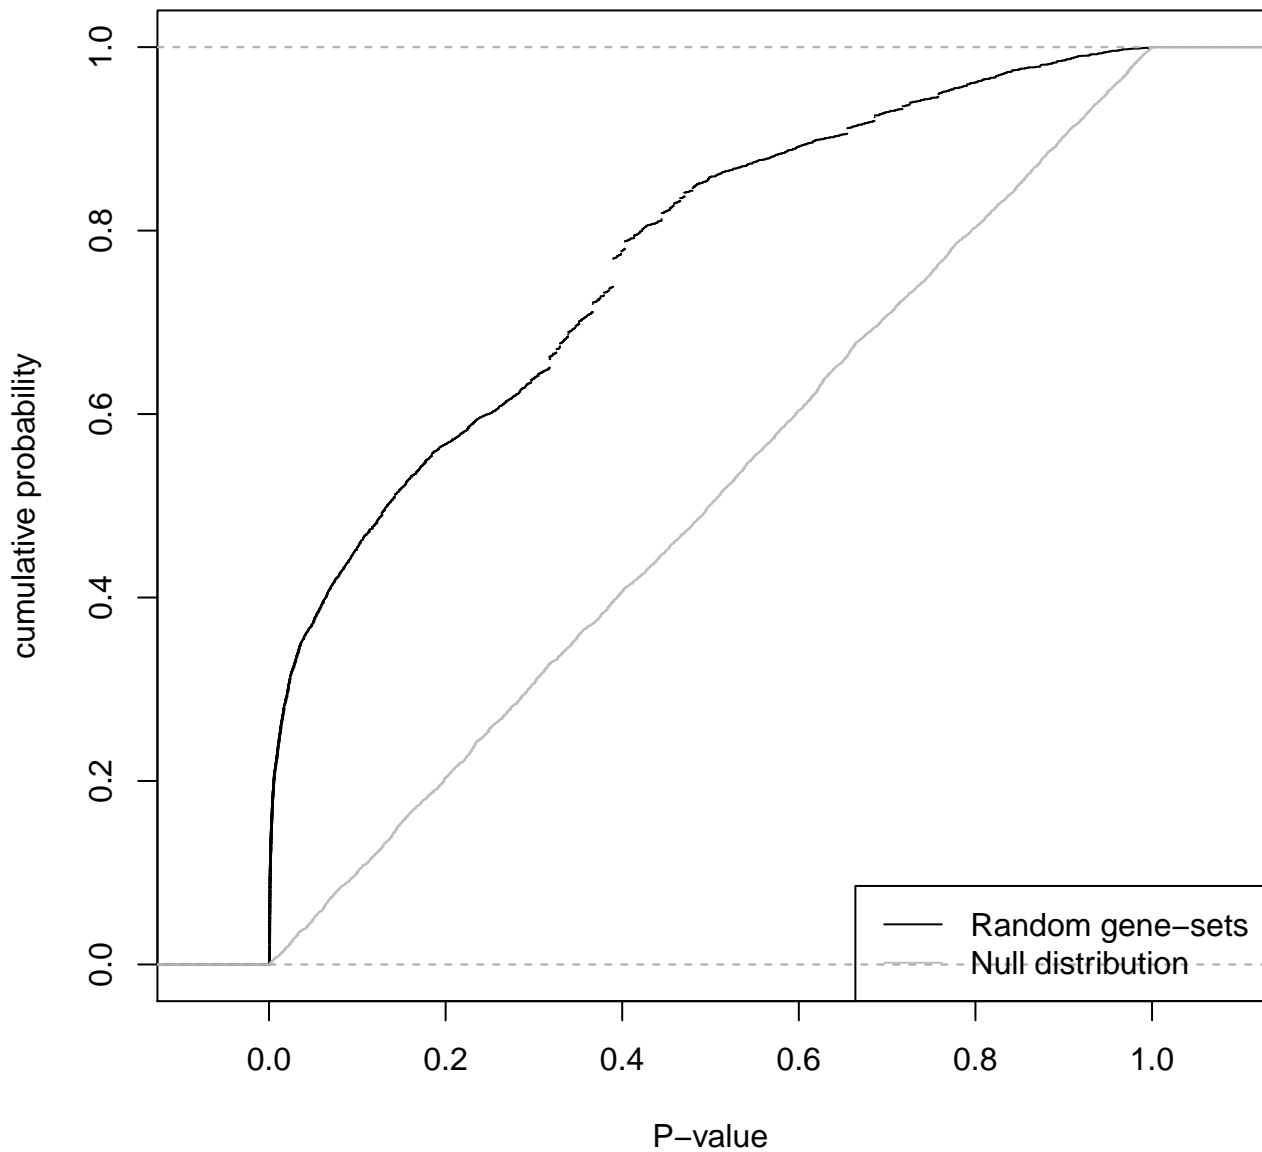

Supplement: pcbi.1006026.s001.pdf [file pcbi.1006026.s001.pdf]
